# Supplementary material for: Genome-wide transcriptome profiling and development of age prediction models in the human brain
Source: publisher site journal article supplement (doi:10.18632/aging.205609), 2024-02-28
Supplement: Supplementary file [file aging-v16i5-205609-supplementary-material-SD1.pdf]

SUPPLEMENTARY FIGURE

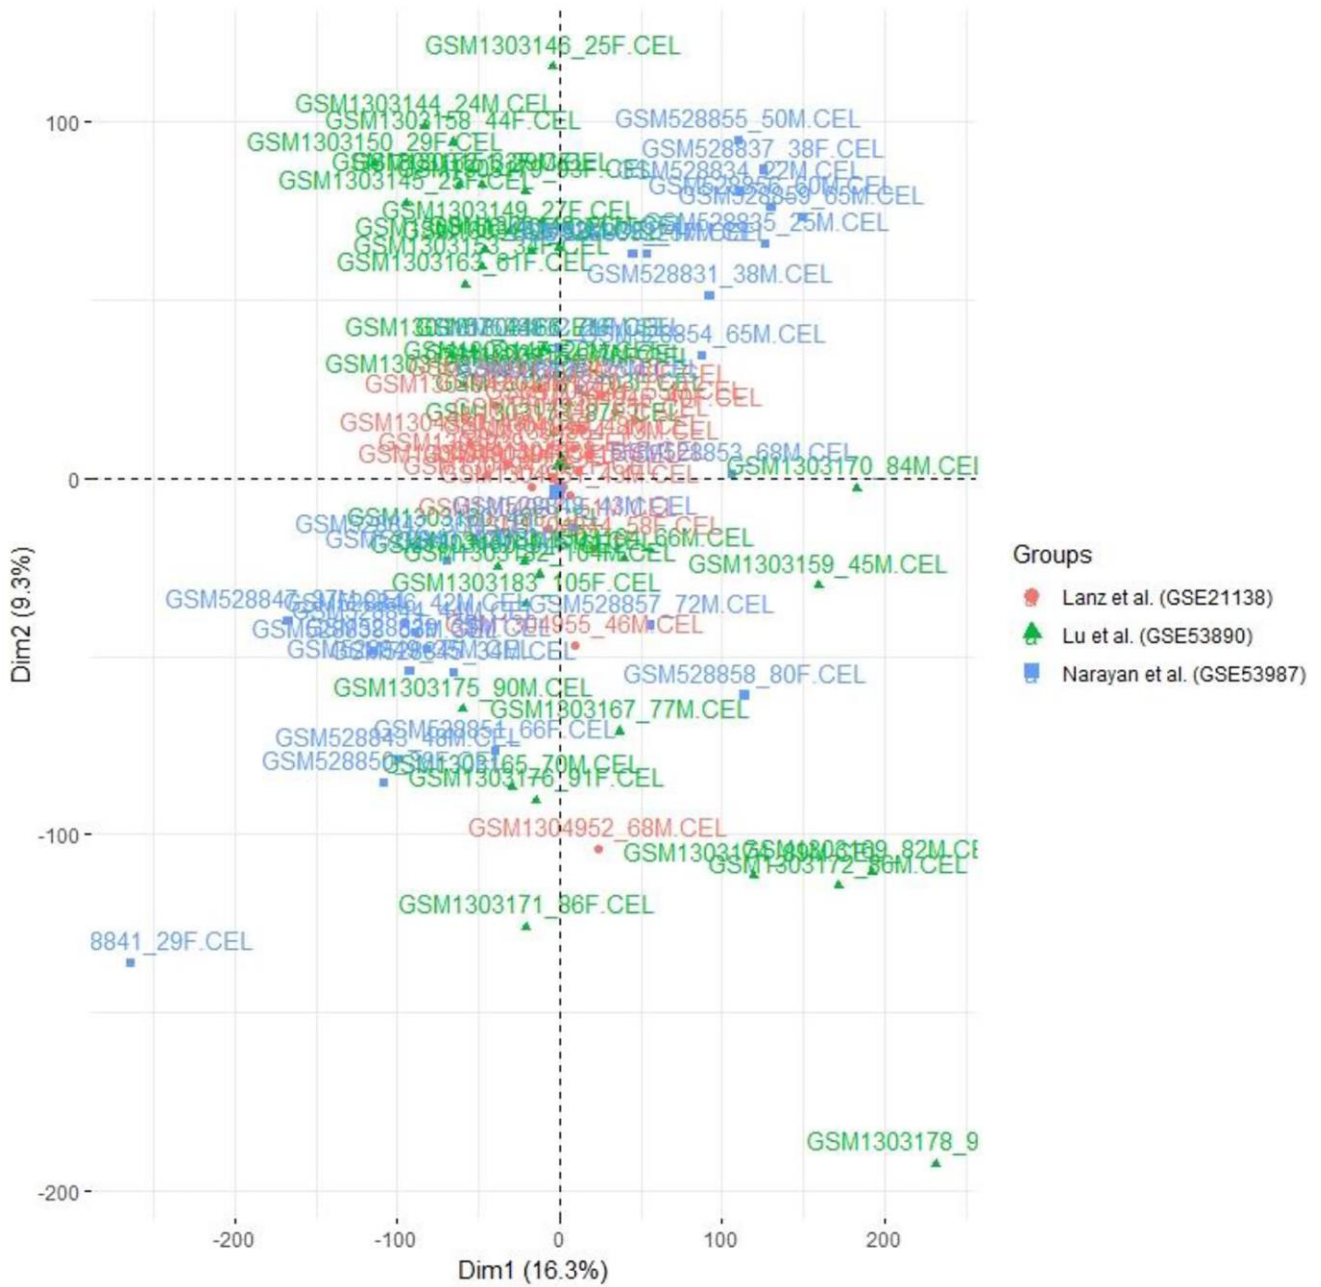

Supplementary Figure 1. PCA plot of the harmonized dataset generated from this study, related to Figures 1–3.
