# Supplementary material for: Genome-wide transcriptome profiling and development of age prediction models in the human brain
Source: publisher site journal article supplement (doi:10.18632/aging.205609), 2024-02-28
Supplement: Supplementary file [file aging-v16i5-205609-supplementary-material-SD10.pdf]

## SUPPLEMENTARY TABLES

**Supplementary Table 9. The age and sex distributions of the training and test set.**

|                      | <b>Total (N = 87)</b> | <b>Training Set (N = 72)</b> | <b>test set (N = 15)</b> | <b>p-value (Training vs. test set)</b> |
|----------------------|-----------------------|------------------------------|--------------------------|----------------------------------------|
| Age: mean (min–max)  | 52.8 (21–105)         | 52.4 (21–105)                | 54.8 (25–103)            | 0.732 <sup>a</sup>                     |
| Female: <i>n</i> (%) | 34 (39.1%)            | 28 (38.8%)                   | 6 (40.0%)                | 1.000 <sup>b</sup>                     |
| Male: <i>n</i> (%)   | 53 (60.9%)            | 44 (61.1%)                   | 9 (60.0%)                |                                        |

<sup>a</sup>Student's *T*-test, <sup>b</sup>Fisher's Exact Test.

**Supplementary Table 10. The parameters used to construct the four prediction models, based on the initial five-fold CV results.**

| <b>Lasso (22 probe sets)</b> | <b>EN (252 probe sets)</b> | <b>XGBoost (269 probe sets)</b> | <b>LightGBM (404 probe sets)</b>   |
|------------------------------|----------------------------|---------------------------------|------------------------------------|
| Alpha = 1                    | Alpha = 0.05               | Learning rate = 0.1             | Learning rate = 0.05               |
| Lambda = 4.335               | Lambda = 45.205            | Gamma = 0.425                   | Max. tree depth = 5                |
|                              |                            | Max. tree depth = 3             | Num. of leaves = 30                |
|                              |                            | Min. child weight = 9.5         | Min. data in a leaf = 22           |
|                              |                            | Subsample ratio = 1             | Min. sum hessian in a leaf = 0.001 |
|                              |                            | Column sample ratio = 0.8       | Subsample ratio = 0.85             |
|                              |                            | L1 regularization = 0           | Column sample ratio = 0.6          |
|                              |                            | L2 regularization = 3.5         | L1 regularization = 0.4            |
|                              |                            | Num. boosting rounds = 366      | L2 regularization = 0.4            |
|                              |                            |                                 | Min. gain to split = 0             |
|                              |                            |                                 | Num. boosting rounds = 970         |
