# Supplementary material for: Genome-wide transcriptome profiling and development of age prediction models in the human brain
Source: Aging (Albany NY). 2024 Feb 28;16(5):4075–94. doi: 10.18632/aging.205609 (PMC10968712; doi:10.18632/aging.205609)
Supplement: Supplementary Table 1 [file aging-16-205609-s002.xlsx]

## Sheet: Sheet1
Supplementary Table 1. Summary of the file names of the CEL files from GEO used, and corresponding age and sex of the samples used for the analysis.
CEL file GEO GSM number	Age	Sex
GSM528833	21	M
GSM1304942	22	M
GSM528834	22	M
GSM1303144	24	M
GSM1303145	25	F
GSM1303146	25	F
GSM528835	25	M
GSM528836	25	M
GSM1303147	26	M
GSM1303148	26	M
GSM528832	26	M
GSM1303149	27	F
GSM1303150	29	F
GSM1303151	29	M
GSM528841	29	F
GSM1303152	33	F
GSM1303153	34	F
GSM528845	34	M
GSM528849	35	M
GSM1303154	36	F
GSM1304939	36	F
GSM528842	36	M
GSM1303155	37	M
GSM528847	37	M
GSM528831	38	M
GSM528837	38	F
GSM528839	38	M
GSM528850	38	F
GSM1304949	39	F
GSM1303156	40	M
GSM1304945	40	F
GSM1304946	41	F
GSM528840	42	M
GSM528846	42	M
GSM1304951	43	M
GSM1304954	43	M
GSM528848	43	M
GSM1303157	44	F
GSM1303158	44	F
GSM528844	44	M
GSM1303159	45	M
GSM1304955	46	M
GSM1303160	48	F
GSM1304948	48	M
GSM1304950	48	M
GSM528843	48	M
GSM1304947	49	M
GSM528855	50	M
GSM1303161	51	M
GSM1304937	51	M
GSM1304938	51	F
GSM1303162	52	M
GSM1304943	52	F
GSM528838	53	M
GSM1304941	55	M
GSM528852	57	M
GSM1304944	58	F
GSM1304953	58	F
GSM528856	60	M
GSM1303163	61	F
GSM1304940	65	F
GSM528854	65	M
GSM528859	65	M
GSM1303164	66	M
GSM528851	66	F
GSM1304952	68	M
GSM528853	68	M
GSM1303165	70	M
GSM1303166	71	F
GSM528857	72	M
GSM1303167	77	M
GSM528858	80	F
GSM1303168	80.6	F
GSM1303169	82	M
GSM1303170	84	M
GSM1303171	86	F
GSM1303172	86	M
GSM1303173	87	F
GSM1303174	89	M
GSM1303175	90	M
GSM1303176	91	F
GSM1303178	92	M
GSM1303179	93	F
GSM1303180	94	F
GSM1303181	103	F
GSM1303182	104	M
GSM1303183	105	F
