# Supplementary material for: Genome-wide transcriptome profiling and development of age prediction models in the human brain
Source: Aging (Albany NY). 2024 Feb 28;16(5):4075–94. doi: 10.18632/aging.205609 (PMC10968712; doi:10.18632/aging.205609)
Supplement: Supplementary Table 2 [file aging-16-205609-s003.xlsx]

## Sheet: Sheet1
Supplementary Table 2. Summary of differentially regulated transcripts across age categories in reference to the young among females and males, related to Figure 1.
Female Age 21-39 (ref.) vs. 65-84 group
Probe set	Symbol	logFC	P.Value	FDR adj.P.Val
1552293_at	TMEM196	-0.4042	7.19668e-05	0.0321436
1552924_a_at	PITPNM2	-0.585016	2.87195e-05	0.0199809
1553410_a_at	ABCC12	-0.808645	2.23697e-05	0.0178688
1557113_at	RPS6KA5	1.0353	6.51141e-05	0.0312773
1559526_at	LOC101930421	0.94267	1.0217e-05	0.0148855
1566989_at	ARID1B	0.445206	0.00010648	0.0392564
200989_at	HIF1A	0.635843	5.73365e-05	0.029443
201060_x_at	STOM	1.08744	0.000142611	0.0452317
201302_at	ANXA4	0.762741	0.000145591	0.0455077
201309_x_at	NREP	-1.07117	6.08411e-05	0.0301653
201324_at	EMP1	1.73432	0.000141948	0.0452317
201413_at	HSD17B4	0.451474	7.01487e-05	0.0318512
201481_s_at	PYGB	0.427578	6.90747e-05	0.0318512
201609_x_at	ICMT	-0.338649	5.37766e-05	0.0286377
201651_s_at	PACSIN2	0.403024	6.52593e-05	0.0312773
201924_at	AFF1	0.789013	3.40056e-05	0.0212584
201941_at	CPD	0.442096	9.66943e-05	0.0368181
202112_at	VWF	0.883672	0.000111965	0.0402569
202545_at	PRKCD	-0.678177	2.84816e-05	0.0199809
202975_s_at	RHOBTB3	1.11285	4.70824e-05	0.0257076
203038_at	PTPRK	0.537116	1.73347e-05	0.017511
203124_s_at	SLC11A2	0.557858	1.8137e-05	0.017511
203367_at	DUSP14	-0.597847	1.28857e-05	0.0153518
203414_at	MMD	-0.788168	1.3008e-06	0.00935167
203540_at	GFAP	1.47817	1.86946e-05	0.017511
203548_s_at	LPL	1.24582	5.57141e-06	0.0127567
203549_s_at	LPL	1.0981	5.26071e-06	0.0127567
203687_at	CX3CL1	-0.541828	1.96365e-05	0.017511
203723_at	ITPKB	1.23789	0.000139573	0.0452317
203921_at	CHST2	-0.583135	0.000117508	0.0418902
204041_at	MAOB	0.711994	1.88321e-05	0.017511
204134_at	PDE2A	-0.39387	2.48934e-05	0.0185134
204392_at	CAMK1	-0.535207	4.4048e-05	0.0250633
204411_at	KIF21B	-0.700418	0.000160991	0.0485617
204723_at	SCN3B	-0.805821	1.47003e-05	0.0165677
205330_at	MN1	-0.726254	1.29657e-05	0.0153518
205591_at	OLFM1	-0.647565	8.56317e-05	0.0348464
205625_s_at	CALB1	-1.42871	2.60943e-05	0.0190776
205626_s_at	CALB1	-1.37944	8.92438e-05	0.0353168
205629_s_at	CRH	-0.641212	9.1878e-05	0.0357041
205630_at	CRH	-2.13608	2.08744e-05	0.0176553
205874_at	ITPKA	-0.691376	6.97801e-05	0.0318512
205901_at	PNOC	-0.755932	1.9892e-05	0.017511
205952_at	KCNK3	-0.703643	4.43089e-05	0.0250633
205960_at	PDK4	1.34952	4.53214e-05	0.0250633
206023_at	NMU	-0.826597	3.73039e-05	0.0223486
206084_at	PTPRR	-0.776387	1.02226e-05	0.0148855
206208_at	CA4	-0.846643	2.66508e-06	0.0127567
206209_s_at	CA4	-1.01533	7.5047e-06	0.01296
206384_at	CACNG3	-0.664242	2.1386e-06	0.0127567
206577_at	VIP	-1.47003	9.72964e-06	0.0148855
206850_at	RASL10A	-0.681272	7.61744e-05	0.0328578
207453_s_at	DNAJB5	-0.869327	8.80056e-06	0.0146005
207629_s_at	ARHGEF2	-0.347108	0.000148385	0.0460474
208116_s_at	MAN1A1	-0.879014	7.30282e-05	0.0321436
208465_at	GRM2	-0.543274	3.58982e-05	0.0218379
208865_at	CSNK1A1	0.360637	1.31683e-05	0.0153518
208877_at	PAK2	0.590856	6.42278e-05	0.0312773
209685_s_at	PRKCB	-0.481519	0.000159423	0.0484316
209869_at	ADRA2A	-0.769136	4.0727e-05	0.0240652
210182_at	CORT	-0.679157	1.13774e-05	0.0153518
210263_at	KCNF1	-0.59909	0.000131591	0.0450322
210380_s_at	CACNA1G	-0.680347	1.29913e-05	0.0153518
210381_s_at	CCKBR	-0.76296	6.95103e-05	0.0318512
210408_s_at	CPNE6	-0.624498	7.8653e-05	0.0332617
210675_s_at	PTPRR	-0.908794	7.42762e-08	0.00141884
210817_s_at	CALCOCO2	0.619143	0.000137507	0.0452317
212233_at	MAP1B	0.394409	0.000169118	0.0499652
212274_at	LPIN1	0.571188	1.92634e-05	0.017511
212586_at	CAST	0.544134	0.000136009	0.0452317
212875_s_at	C2CD2	0.492062	0.000151521	0.0466848
213096_at	TMCC2	0.430541	0.000104422	0.0388673
213131_at	OLFM1	-0.589455	1.03527e-05	0.0148855
213325_at	NECTIN3	-1.12091	7.13058e-06	0.01296
213327_s_at	USP12	-0.400561	0.000104523	0.0388673
213338_at	TMEM158	-0.826542	1.26916e-05	0.0153518
213479_at	NPTX2	-1.45722	8.82489e-05	0.0352464
213496_at	PLPPR4	-0.799086	3.855e-06	0.0127567
213791_at	PENK	-0.996766	8.25367e-05	0.0345652
213925_at	STUM	-0.865356	5.21569e-06	0.0127567
214595_at	KCNG1	-1.04071	5.61904e-06	0.0127567
214811_at	RIMBP2	-0.735507	7.08927e-06	0.01296
214965_at	SPATA2L	-0.763809	5.12383e-05	0.027627
216048_s_at	RHOBTB3	1.08511	8.42568e-05	0.0347174
218595_s_at	HEATR1	0.370709	0.000129857	0.0450322
218623_at	NSG2	-0.567545	2.18219e-05	0.0177602
218866_s_at	POLR3K	-0.511506	9.14768e-05	0.0357041
218868_at	ACTR3B	-0.634212	3.09138e-05	0.0208408
218888_s_at	NETO2	-1.0136	7.43784e-08	0.00141884
218995_s_at	EDN1	0.772904	0.000141052	0.0452317
219461_at	PAK6	-0.580089	9.57909e-05	0.0368181
219752_at	RASAL1	-0.453408	2.29293e-05	0.0179828
219939_s_at	CSDE1	0.537023	7.51128e-06	0.01296
220331_at	CYP46A1	-0.635454	4.10612e-06	0.0127567
220677_s_at	ADAMTS8	-0.641383	2.40908e-06	0.0127567
220889_s_at	CA10	-0.753446	0.000164849	0.0490399
221718_s_at	AKAP13	0.674643	0.000144958	0.0455077
221810_at	RAB15	-0.551014	7.28897e-06	0.01296
221904_at	FAM131A	-0.703579	4.28512e-06	0.0127567
222473_s_at	ERBIN	1.06831	9.73052e-05	0.0368181
222774_s_at	NETO2	-1.23694	9.86789e-08	0.00141884
223226_x_at	SSBP4	-0.456739	2.694e-05	0.0193676
223382_s_at	ZNRF1	-0.566825	5.53837e-06	0.0127567
223383_at	ZNRF1	-0.634815	2.44793e-05	0.0185134
223604_at	GARNL3	-0.364785	5.62237e-05	0.0293995
223913_s_at	MIR7-3HG	-1.01693	1.49795e-05	0.0165677
224393_s_at	TMEM121B	-0.640902	9.66523e-07	0.0083382
224818_at	SORT1	0.403423	0.000141855	0.0452317
224840_at	FKBP5	1.78444	4.43963e-05	0.0250633
224856_at	FKBP5	1.48564	2.04966e-05	0.0176553
224896_s_at	TTL	-0.479058	0.000138534	0.0452317
224908_s_at	TTL	-0.631224	5.65704e-05	0.0293995
225201_s_at	MRPL14	-0.463201	2.13821e-05	0.0177369
225202_at	RHOBTB3	1.25012	6.68428e-05	0.0316842
225582_at	ITPRIP	0.394552	8.45096e-05	0.0347174
225728_at	SORBS2	-0.541761	6.5166e-06	0.01296
225739_at	RAB11FIP4	-0.473472	0.000111993	0.0402569
227015_at	ASPHD2	-0.542298	3.15195e-05	0.0208408
227408_s_at	SNX25	-0.54095	3.32127e-05	0.0210681
227530_at	AKAP12	0.491729	1.54159e-05	0.0166241
227550_at	GFRA1	0.53857	8.65087e-05	0.0348743
228135_at	C1orf52	-0.405993	6.07662e-05	0.0301653
228368_at	ARHGAP20	-0.863491	3.31656e-05	0.0210681
228501_at	GALNT15	1.12119	6.07062e-05	0.0301653
228550_at	RTN4R	-0.699692	2.47394e-05	0.0185134
229254_at	MFSD4A	-0.595872	0.000138665	0.0452317
229430_at	VXN	-0.394852	3.5945e-05	0.0218379
229799_s_at	NCAM1	0.749294	0.000164656	0.0490399
230755_at	RHBDL3	0.582848	5.46911e-06	0.0127567
230765_at	NWD2	-0.862317	1.67541e-05	0.017511
230923_at	TAFA1	-0.773152	0.000109307	0.0399574
231186_at	LINC00643	-0.528644	0.000124132	0.0438889
231935_at	ARPP21	-0.680871	7.54688e-05	0.0328578
232027_at	SYNE1	-0.724727	7.25834e-05	0.0321436
232914_s_at	SYTL2	-0.454665	1.79142e-05	0.017511
233487_s_at	LRRC8A	0.507306	0.000159436	0.0484316
235591_at	SSTR1	-0.845535	3.1888e-05	0.0208408
235649_at	ADAMTS8	-0.569523	3.14996e-05	0.0208408
235793_at	TPGS2	-0.537808	7.8097e-05	0.0332617
236361_at	GALNT15	0.944485	4.50405e-05	0.0250633
236377_at	TMEM132D	-0.524429	0.000132586	0.0450322
237939_at	EPHA5	-0.745873	0.000130545	0.0450322
238815_at	LRRTM1	-0.626313	1.27294e-05	0.0153518
244675_at	RGS8	-0.811555	2.87373e-07	0.00309896
59697_at	RAB15	-0.525494	0.000126544	0.0443778
823_at	CX3CL1	-0.672432	5.11229e-06	0.0127567
Female Age 21-39 (ref.) vs. 85-105 group
Probe set	Symbol	logFC	P.Value	FDR adj.P.Val
1552256_a_at	SCARB1	0.297143	0.00163624	0.0452722
1552264_a_at	MAPK1	-0.709222	0.000128561	0.0108716
1552293_at	TMEM196	-0.373728	4.22067e-05	0.00589187
1552299_at	AK9	-0.33222	0.000580512	0.0244774
1552301_a_at	CORO6	0.607587	0.000125605	0.0107287
1552330_at	CENPBD1P	-0.460903	0.000903443	0.0318765
1552625_a_at	TRNT1	-0.442196	0.000291369	0.0169383
1552658_a_at	NAV3	-0.59952	0.00172846	0.0469208
1552722_at	ARPP21	-1.70978	8.11604e-07	0.000598637
1552733_at	KLHDC1	0.458399	0.000306206	0.017109
1552760_at	HDAC9	-0.681191	0.000642559	0.0261726
1552766_at	HS6ST2	-0.638444	8.95051e-05	0.00897456
1552924_a_at	PITPNM2	-0.525415	2.63474e-05	0.00479534
1552977_a_at	CNPY3	-0.45403	0.00116698	0.0372135
1553112_s_at	CDK8	-0.464613	0.000765222	0.0288256
1553185_at	RASEF	1.17381	0.000266269	0.0160602
1553186_x_at	RASEF	1.11697	0.00037655	0.0189687
1553351_at	OTUD7A	-0.420973	0.00177542	0.0478273
1553510_s_at	CNOT9	-0.370148	0.00189309	0.0498526
1553535_a_at	RANGAP1	-0.505961	0.000725789	0.0279277
1553587_a_at	POLE4	-0.426663	0.000211993	0.0144202
1553689_s_at	METTL6	-0.379852	0.00149032	0.0429339
1553864_at	GPR26	-1.24273	3.09163e-06	0.00146969
1553865_a_at	GPR26	-0.846701	1.59079e-05	0.00359276
1553947_at	EXOSC6	-0.49418	9.75978e-05	0.00948172
1553997_a_at	ASPHD1	-0.394346	0.00070492	0.0275421
1554112_a_at	ULK2	-0.433248	0.000152582	0.0116903
1554239_s_at	ZADH2	-0.333861	0.000119441	0.0104717
1554321_a_at	NFS1	-0.491842	0.000810449	0.0297321
1554333_at	DNAJA4	-1.05036	0.000744431	0.0282917
1554334_a_at	DNAJA4	-0.651862	0.000480716	0.021989
1554443_s_at	BEST1	0.355512	0.001086	0.0357049
1554451_s_at	DNAJC14	-0.560037	0.000296736	0.0170435
1554466_a_at	METTL26	-0.598452	2.71028e-05	0.00482469
1554468_s_at	FBF1	-0.291342	0.000268158	0.0160653
1554500_a_at	RGS7	-1.13644	1.08467e-05	0.00277078
1554509_a_at	MINDY3	-0.443084	0.00112349	0.0365199
1554510_s_at	GHITM	-0.382191	0.00164077	0.045339
1554524_a_at	OLFM3	-0.631175	0.00033384	0.0178858
1554539_a_at	RHOF	-0.394254	0.00132601	0.0399702
1554633_a_at	MYT1L	-1.38194	0.000166742	0.0124007
1554640_at	PALM2AKAP2	-0.553799	0.000642068	0.0261726
1554679_a_at	LAPTM4B	-0.606102	0.0016642	0.0457505
1554689_a_at	NLGN4X	-0.605478	3.22369e-06	0.0014952
1554755_a_at	MTUS2	-0.363816	0.00135824	0.0406157
1554757_a_at	INPP5A	-0.703576	0.000258659	0.0158438
1554758_a_at	CD99L2	-0.714744	4.4505e-05	0.00605413
1554863_s_at	DOK5	-0.464846	2.5658e-05	0.00468965
1555098_a_at	CACNB2	-0.74514	2.91711e-05	0.00489609
1555140_a_at	BCL2L2	-0.655442	0.000218399	0.014538
1555202_a_at	RPRD1A	-0.581833	0.00168138	0.0460193
1555226_s_at	C1orf43	-0.439803	0.000109616	0.00995427
1555230_a_at	KCNIP2	-0.616868	0.00132829	0.0400074
1555235_s_at	IQCF3	-0.281821	0.00032862	0.0177743
1555262_a_at	MAGI1	-0.416645	0.000453691	0.021111
1555304_a_at	KCNH5	-0.403806	0.000523764	0.0230772
1555337_a_at	ZNF317	-0.498709	0.000504553	0.0225238
1555388_s_at	SNX25	-0.381876	0.00114241	0.0367126
1555461_at	TXNL4A	-0.635683	8.01294e-05	0.00836896
1555487_a_at	ACTR3B	-0.904052	4.74599e-08	8.18874e-05
1555609_a_at	ZMAT3	-0.682037	0.000932247	0.0324818
1555611_s_at	MBD1	-0.43349	0.000303283	0.0170992
1555618_s_at	SAE1	-0.740721	5.09108e-06	0.00186105
1555702_a_at	ST3GAL3	-0.378736	0.00174704	0.047243
1555716_a_at	CXADR	-0.506435	0.000233298	0.0151708
1555797_a_at	ARPC5	-0.618712	6.35475e-05	0.0075513
1555808_a_at	EXD2	-0.381054	0.000256635	0.0158142
1555867_at	GNG4	-0.525717	0.000332065	0.0178154
1556365_at	LY86-AS1	-0.690001	0.00145397	0.0422337
1556366_s_at	LY86-AS1	-0.993811	2.95628e-05	0.00490458
1556619_at	SHISA9	-0.418304	0.00100707	0.0340305
1557064_s_at	HGSNAT	0.391922	0.000326124	0.0177171
1557180_at	C11orf87	-1.20519	1.29635e-05	0.00307242
1557181_s_at	C11orf87	-0.887126	0.000218177	0.014538
1557475_at	LINC00507	-1.19479	7.65228e-05	0.00817705
1557910_at	HSP90AB1	-0.881063	0.000466832	0.0215137
1557965_at	MTERF4	-0.374598	0.00130729	0.0396788
1557966_x_at	MTERF4	-0.34349	0.000733761	0.0280592
1558136_s_at	TAF11	-0.544691	3.2148e-05	0.00508478
1558795_at	ADGRB3-DT	0.908783	3.03627e-05	0.00494224
1558796_a_at	ADGRB3-DT	0.648807	6.97034e-05	0.00784337
1559545_at	SNRPN	1.03072	2.77393e-05	0.00482907
1559546_s_at	SNRPN	0.707239	6.48548e-05	0.00760194
1559633_a_at	CHRM3	-1.13165	0.000509897	0.022628
1560445_x_at	ARHGEF1	0.428272	0.00149061	0.0429339
1560587_s_at	PRDX5	-0.435365	7.53411e-05	0.00814496
1560659_at	LINC00342	0.531963	0.000648257	0.026284
1560661_x_at	LINC00342	0.55937	0.000725549	0.0279277
1560692_at	VSTM2A-OT1	-0.776025	0.000598541	0.0250175
1560910_at	PPIL6	0.269545	0.00032747	0.0177575
1561346_at	LOC101927166	0.65131	0.000617718	0.0255713
1563658_a_at	SYT9	-0.427356	0.00020526	0.0142599
1563809_a_at	MCF2L	-0.371819	0.00177738	0.0478273
1564520_s_at	PRMT5	-0.341087	0.0010252	0.0344944
1565620_at	AGAP4	0.624505	0.00158323	0.0445773
1566603_s_at	RPUSD3	-0.568632	0.000714968	0.0277839
1566989_at	ARID1B	0.395363	0.000116333	0.0103242
1568618_a_at	GALNT1	-0.44275	0.00106978	0.035496
1568625_at	SVOP	-0.583542	0.00084905	0.0305815
1568954_s_at	C16orf72	-0.635284	0.000379711	0.0190646
1569905_at	HSD11B1L	-0.477481	1.04437e-05	0.00277078
1861_at	BAD	-0.532579	9.81455e-05	0.0095135
200052_s_at	ILF2	-0.418472	1.97799e-05	0.00410195
200067_x_at	SNX3	-0.405813	1.21662e-06	0.00078327
200068_s_at	CANX	0.302169	0.00023647	0.0152469
200078_s_at	ATP6V0B	-0.642664	2.09103e-09	1.28852e-05
200604_s_at	PRKAR1A	-0.748961	0.000231823	0.0151281
200613_at	AP2M1	-0.354734	0.000339712	0.0179797
200627_at	PTGES3	-0.273127	0.00152483	0.0436454
200628_s_at	WARS1	-0.556138	0.000955111	0.0330113
200630_x_at	SET	0.509905	0.000366006	0.0186395
200638_s_at	YWHAZ	-0.513179	0.00014277	0.0113492
200640_at	YWHAZ	-0.316941	0.000262288	0.0159574
200641_s_at	YWHAZ	-0.966724	1.02932e-05	0.00277078
200658_s_at	PHB	-0.44923	1.22403e-05	0.00299993
200686_s_at	SRSF11	0.570211	8.4207e-06	0.00243776
200693_at	YWHAQ	-0.340215	5.24175e-05	0.00666971
200696_s_at	GSN	0.906721	0.000103161	0.00971076
200734_s_at	ARF3	-0.427581	0.000206539	0.0143003
200739_s_at	SUMO3	-0.585283	0.000216589	0.014538
200747_s_at	NUMA1	0.293918	0.000206491	0.0143003
200749_at	RAN	-0.344358	0.000418755	0.0201596
200751_s_at	HNRNPC	-0.426769	0.00183017	0.0486409
200785_s_at	LRP1	0.316364	0.00176564	0.0476899
200802_at	SARS1	-0.418251	0.000279783	0.0165095
200808_s_at	ZYX	0.47183	0.000216164	0.014538
200820_at	PSMD8	-0.511559	1.07074e-05	0.00277078
200846_s_at	PPP1CA	-0.288176	3.84546e-05	0.00564197
200848_at	AHCYL1	0.89444	4.25835e-05	0.00589264
200849_s_at	AHCYL1	0.776252	0.000104772	0.00973999
200850_s_at	AHCYL1	0.684776	0.000498035	0.0224246
200853_at	H2AZ1	-0.40525	0.00151274	0.0434435
200861_at	CNOT1	0.286524	0.00184022	0.0487878
200862_at	DHCR24	-0.515488	0.000970882	0.0333432
200877_at	CCT4	-0.315503	0.00048891	0.0221798
200880_at	DNAJA1	-0.460323	2.0927e-05	0.00420505
200881_s_at	DNAJA1	-0.72874	4.60654e-06	0.00182255
200894_s_at	FKBP4	-0.627636	0.000144141	0.0113666
200903_s_at	AHCY	-0.351965	0.00019825	0.0139861
200911_s_at	TACC1	0.267525	0.000730796	0.0280592
200927_s_at	RAB14	-0.345498	0.000897023	0.0317738
200940_s_at	RERE	0.352005	0.000127986	0.0108461
200941_at	HSBP1	-0.414189	3.3752e-07	0.000326217
200987_x_at	PSME3	-0.420581	5.85553e-05	0.00717551
201008_s_at	TXNIP	1.11095	0.00160712	0.0448694
201009_s_at	TXNIP	1.04638	0.000376867	0.0189687
201010_s_at	TXNIP	1.22136	0.000330908	0.0178154
201048_x_at	RAB6A	-0.868933	0.00177684	0.0478273
201052_s_at	PSMF1	-0.50739	2.04078e-06	0.00108678
201054_at	HNRNPA0	-0.372525	0.00144707	0.0421217
201056_at	GOLGB1	0.354252	3.724e-06	0.00155472
201063_at	RCN1	-0.54176	0.000989827	0.0336986
201071_x_at	SF3B1	0.317901	0.000944318	0.0327437
201078_at	TM9SF2	-0.298572	0.001748	0.047243
201192_s_at	PITPNA	-0.481541	0.000270675	0.0161488
201196_s_at	AMD1	-0.343294	0.000374711	0.0189264
201207_at	TNFAIP1	-0.283218	0.000500293	0.0224793
201214_s_at	PPP1R7	-0.350611	0.000302573	0.0170992
201221_s_at	SNRNP70	0.552079	3.45162e-06	0.00151451
201225_s_at	SRRM1	0.488663	1.26711e-06	0.000802175
201237_at	CAPZA2	-0.585822	0.000645991	0.0262752
201238_s_at	CAPZA2	-0.514062	0.000132559	0.0110172
201245_s_at	OTUB1	-0.569338	0.000760265	0.0287954
201267_s_at	PSMC3	-0.390415	0.0011896	0.037622
201276_at	RAB5B	0.279374	0.00109023	0.0357612
201284_s_at	APEH	-0.368844	0.00143134	0.0419149
201296_s_at	WSB1	1.07778	0.000151651	0.0116766
201302_at	ANXA4	0.728826	5.37811e-05	0.00682308
201309_x_at	NREP	-1.10761	4.85901e-06	0.00182255
201310_s_at	NREP	-0.490233	0.000578018	0.0244393
201335_s_at	ARHGEF12	-0.402522	0.00130965	0.0396788
201336_at	VAMP3	0.691029	0.000364696	0.0186368
201341_at	ENC1	-0.370002	0.000449566	0.0210542
201345_s_at	UBE2D2	-0.348524	0.00109997	0.0359624
201351_s_at	YME1L1	-0.334768	0.00135827	0.0406157
201364_s_at	OAZ2	-0.30724	0.00062172	0.0256631
201366_at	ANXA7	0.317853	0.00103037	0.0346144
201373_at	PLEC	0.292513	0.00024676	0.0155105
201377_at	UBAP2L	0.376496	6.76051e-05	0.00774052
201417_at	SOX4	-0.970918	0.00011372	0.010156
201435_s_at	EIF4E	-0.460655	0.00155089	0.0439827
201466_s_at	JUN	-0.774756	4.98042e-05	0.00641284
201481_s_at	PYGB	0.372157	0.000102133	0.00968239
201520_s_at	GRSF1	-0.363808	0.00161163	0.0449081
201537_s_at	DUSP3	-0.567983	0.00127596	0.0392012
201538_s_at	DUSP3	-0.660829	3.90703e-05	0.00565876
201573_s_at	ETF1	-0.311323	0.000681278	0.0270349
201593_s_at	ZC3H15	-0.429056	0.0002401	0.0153433
201613_s_at	AP1G2	0.604973	2.84314e-05	0.00484739
201629_s_at	ACP1	-0.713007	0.000173476	0.0127913
201652_at	COPS5	-0.316477	0.000989777	0.0336986
201659_s_at	ARL1	-0.406871	0.000529903	0.023229
201674_s_at	AKAP1	0.368786	0.000250394	0.015608
201705_at	PSMD7	-0.470099	0.000158475	0.0119508
201722_s_at	GALNT1	-0.295251	0.000565099	0.0241129
201739_at	SGK1	0.875453	0.000646297	0.0262752
201749_at	ECE1	0.332111	0.000213205	0.0144337
201760_s_at	WSB2	-0.405314	2.95286e-05	0.00490458
201772_at	AZIN1	-0.567095	4.69206e-06	0.00182255
201781_s_at	AIP	-0.331688	0.000524899	0.0231036
201821_s_at	TIMM17A	-0.839463	5.34095e-06	0.00187538
201877_s_at	PPP2R5C	-0.270711	0.000204571	0.0142599
201878_at	ARIH1	-0.297256	0.000550423	0.0237016
201881_s_at	ARIH1	-0.431991	0.000242957	0.0154092
201898_s_at	UBE2A	-0.410034	3.03618e-05	0.00494224
201902_s_at	YY1	-0.442243	0.000134015	0.0110473
201912_s_at	GSPT1	-0.319757	0.000548176	0.0236603
201919_at	SLC25A36	0.312498	2.72917e-05	0.00482469
201924_at	AFF1	0.705839	3.33303e-05	0.00520907
201927_s_at	PKP4	-0.626687	0.000795006	0.0294399
201939_at	PLK2	-0.477981	0.00148185	0.0427555
201946_s_at	CCT2	-0.541758	8.4631e-05	0.00867116
201966_at	NDUFS2	-0.317337	0.000108033	0.00989382
201979_s_at	PPP5C	-0.309591	0.0013918	0.041233
201993_x_at	HNRNPDL	0.363729	6.80212e-05	0.00774168
202049_s_at	ZMYM4	-0.443833	0.00012216	0.0106452
202058_s_at	KPNA1	-0.565071	0.000109357	0.00995173
202112_at	VWF	0.832364	5.04565e-05	0.00647086
202128_at	AREL1	-0.484611	3.15994e-05	0.00506706
202143_s_at	COPS8	-0.563863	9.99777e-05	0.0096262
202147_s_at	IFRD1	-0.451528	1.94015e-05	0.00408806
202178_at	PRKCZ	-0.319208	5.80384e-05	0.00717332
202213_s_at	CUL4B	-0.527979	0.00104796	0.0350144
202216_x_at	NFYC	-0.270339	0.00105586	0.0352511
202219_at	SLC6A8	0.55732	4.4913e-05	0.00605413
202225_at	CRK	-0.315868	0.000260122	0.0158704
202239_at	PARP4	0.476787	0.00139486	0.0412675
202249_s_at	DCAF8	0.266754	0.000168014	0.0124524
202272_s_at	FBXO28	-0.363295	0.00123489	0.0385498
202281_at	GAK	0.267653	0.000431578	0.0206158
202308_at	SREBF1	0.528562	0.000125395	0.0107287
202354_s_at	GTF2F1	-0.397294	0.000123333	0.0106977
202355_s_at	GTF2F1	-0.289695	0.00154206	0.0438272
202360_at	MAML1	0.453138	0.000109295	0.00995173
202364_at	MXI1	0.542894	0.00022132	0.0146646
202393_s_at	KLF10	-0.832565	0.000364028	0.0186368
202414_at	ERCC5	0.346585	0.000828437	0.0301514
202422_s_at	ACSL4	-0.591911	0.000413098	0.0199988
202425_x_at	PPP3CA	0.415075	0.00112763	0.0365442
202432_at	PPP3CB	-0.478578	3.44911e-06	0.00151451
202467_s_at	COPS2	-0.277728	0.0014448	0.0421217
202468_s_at	CTNNAL1	0.586356	0.000421351	0.0202394
202498_s_at	SLC2A3	-0.68323	7.40293e-05	0.00806378
202501_at	MAPRE2	-0.459561	1.49044e-05	0.00341969
202506_at	ITPRID2	0.618504	0.000242412	0.0153997
202511_s_at	ATG5	-0.414767	8.96728e-05	0.00897456
202519_at	MLXIP	0.555463	0.000259893	0.0158704
202524_s_at	SPOCK2	0.342714	0.000193405	0.0137213
202539_s_at	HMGCR	-0.690211	0.000789429	0.0293914
202545_at	PRKCD	-0.597627	3.57423e-05	0.00546718
202558_s_at	HSPA13	-0.851725	0.000185669	0.0134442
202593_s_at	GDE1	-0.621111	1.68774e-06	0.000970676
202614_at	SLC30A9	-0.50353	1.96199e-05	0.00408842
202640_s_at	RANBP3	0.279267	0.000957725	0.0330113
202651_at	LPGAT1	-0.507589	0.00146799	0.0424692
202674_s_at	LMO7	-0.425375	0.000217299	0.014538
202727_s_at	IFNGR1	0.562067	0.000852664	0.0306753
202736_s_at	LSM4	-0.37995	0.000321193	0.0175907
202752_x_at	SLC7A8	0.341839	0.00177586	0.0478273
202766_s_at	FBN1	0.51504	7.63585e-05	0.00817705
202775_s_at	SFSWAP	0.461541	1.59086e-05	0.00359276
202779_s_at	UBE2S	-0.767834	1.32196e-08	4.38637e-05
202795_x_at	TRIOBP	0.284236	0.00093366	0.0325048
202822_at	LPP	0.474776	0.00160155	0.0448551
202824_s_at	ELOC	-0.294768	0.000267222	0.0160602
202836_s_at	TXNL4A	-0.356068	3.379e-05	0.00526185
202872_at	ATP6V1C1	-0.496947	0.000488522	0.0221798
202873_at	ATP6V1C1	-0.786461	0.0014377	0.0420252
202874_s_at	ATP6V1C1	-0.637989	3.94099e-05	0.00565876
202887_s_at	DDIT4	1.05101	0.000359886	0.018569
202915_s_at	FAM20B	-0.429241	0.00119214	0.0376449
202923_s_at	GCLC	0.38705	0.000791766	0.0293914
202927_at	PIN1	-0.430789	6.99867e-05	0.00784337
202962_at	KIF13B	0.383566	0.00148173	0.0427555
202975_s_at	RHOBTB3	1.16293	2.85885e-06	0.00139944
202976_s_at	RHOBTB3	1.02357	0.000202498	0.0141798
202988_s_at	RGS1	1.35894	0.000128887	0.0108716
203013_at	ECD	-0.275179	0.00125087	0.0387618
203023_at	NOP16	-0.417967	0.00108191	0.0356245
203038_at	PTPRK	0.442103	6.61302e-05	0.00770953
203060_s_at	PAPSS2	0.910451	0.000503631	0.0225238
203079_s_at	CUL2	-0.473569	0.000299926	0.0170992
203080_s_at	BAZ2B	0.717109	0.00152297	0.0436261
203086_at	KIF2A	-0.284694	0.000801306	0.0296181
203087_s_at	KIF2A	-0.470619	0.000172627	0.0127505
203123_s_at	SLC11A2	0.300899	0.00169363	0.0462372
203124_s_at	SLC11A2	0.483179	3.067e-05	0.00497349
203158_s_at	GLS	-0.892514	0.00132439	0.0399702
203213_at	CDK1	-0.268129	0.000833028	0.0301861
203223_at	RABEP1	-0.66494	0.000272422	0.0161858
203225_s_at	RFK	-0.514992	8.93042e-06	0.00251774
203234_at	UPP1	0.462905	0.00117837	0.0374294
203249_at	EZH1	0.314577	6.03561e-05	0.00729396
203263_s_at	ARHGEF9	-0.832495	0.00019133	0.0136639
203265_s_at	MAP2K4	-0.802078	0.000733534	0.0280592
203269_at	NSMAF	0.54219	6.18827e-06	0.00201565
203272_s_at	TUSC2	-0.685537	1.53726e-08	4.4261e-05
203301_s_at	DMTF1	0.427468	2.80403e-05	0.00483731
203306_s_at	SLC35A1	0.288166	0.00110328	0.0360259
203352_at	ORC4	-0.521011	4.29235e-05	0.00589651
203367_at	DUSP14	-0.433613	0.000308805	0.017232
203380_x_at	SRSF5	0.40292	0.00109993	0.0359624
203389_at	KIF3C	-0.315299	0.000484667	0.0220995
203414_at	MMD	-0.784758	1.08581e-07	0.000149501
203484_at	SEC61G	-0.287864	0.00161907	0.0449701
203487_s_at	ARMC8	-0.368172	0.00152315	0.0436261
203540_at	GFAP	1.0455	0.000548517	0.0236603
203549_s_at	LPL	0.742518	0.000405993	0.0198554
203566_s_at	AGL	0.541407	0.00124277	0.0386773
203569_s_at	OFD1	0.587582	0.000316028	0.0174544
203594_at	RTCA	-0.530609	3.97526e-05	0.0056779
203599_s_at	WBP4	0.291682	8.74075e-05	0.00882979
203608_at	ALDH5A1	0.332568	0.000941585	0.0327015
203624_at	AKAP17A	0.311389	9.67259e-05	0.00943953
203660_s_at	PCNT	0.387628	5.87745e-05	0.00718198
203663_s_at	COX5A	-0.388252	0.000300934	0.0170992
203664_s_at	POLR2D	-0.417356	0.000311289	0.0173481
203687_at	CX3CL1	-0.433588	0.000112016	0.0100663
203688_at	PKD2	0.635146	0.000490639	0.0222298
203720_s_at	ERCC1	-0.267128	0.00161688	0.0449672
203723_at	ITPKB	1.01871	0.000414812	0.0200179
203745_at	HCCS	-0.351933	0.000504937	0.0225238
203746_s_at	HCCS	-0.410446	0.00144718	0.0421217
203763_at	DYNC2LI1	0.538185	0.000946965	0.0328091
203767_s_at	STS	-0.664586	0.00109103	0.0357612
203787_at	SSBP2	-0.349767	0.000389555	0.0193106
203794_at	CDC42BPA	0.31371	0.000517657	0.0229017
203804_s_at	LUC7L3	0.714296	7.03487e-05	0.00786138
203839_s_at	TNK2	0.491887	3.55464e-05	0.00545657
203841_x_at	MAPRE3	-0.621832	0.00141503	0.0415501
203867_s_at	NLE1	-0.337682	0.000217813	0.014538
203890_s_at	DAPK3	-0.608725	0.000292981	0.0169634
203895_at	PLCB4	-0.509661	0.00107449	0.0355732
203921_at	CHST2	-0.449885	0.000773904	0.0290787
203927_at	NFKBIE	-0.341777	0.000247031	0.0155105
203931_s_at	MRPL12	-0.375663	0.0009502	0.0328684
203946_s_at	ARG2	-1.02574	7.89407e-06	0.00233226
203961_at	NEBL	0.481081	0.00143383	0.0419594
203962_s_at	NEBL	0.468934	0.000828152	0.0301514
203981_s_at	ABCD4	0.392343	6.75589e-05	0.00774052
204035_at	SCG2	-0.641578	0.00091279	0.0321152
204040_at	RNF144A	0.413456	0.00013195	0.0110172
204041_at	MAOB	0.50155	0.000578593	0.0244393
204079_at	TPST2	-0.482272	0.00161338	0.0449187
204134_at	PDE2A	-0.335008	5.52594e-05	0.00690927
204185_x_at	PPID	-0.549044	0.00145947	0.0423649
204186_s_at	PPID	-0.991871	4.84531e-06	0.00182255
204187_at	GMPR	0.793728	0.000257394	0.0158284
204206_at	MNT	0.289881	0.000244859	0.0154641
204212_at	ACOT8	-0.415806	4.17777e-05	0.00586996
204247_s_at	CDK5	-0.429154	4.60197e-05	0.00614569
204280_at	RGS14	-0.340535	0.00070811	0.0276031
204303_s_at	CTIF	0.322402	0.00142851	0.0418606
204331_s_at	MRPS12	-0.84337	1.77395e-08	4.44645e-05
204338_s_at	RGS4	-1.71164	4.13039e-05	0.00582609
204339_s_at	RGS4	-0.87334	0.00123778	0.0385498
204361_s_at	SKAP2	-0.533982	0.000424045	0.0203461
204362_at	SKAP2	-0.472342	7.69649e-05	0.00817705
204373_s_at	CEP350	0.610589	0.00182317	0.0485148
204392_at	CAMK1	-0.495772	2.43831e-05	0.00451401
204414_at	LARGE1	-0.409893	0.000404195	0.0198113
204417_at	GALC	0.371085	0.00152043	0.0436062
204471_at	GAP43	-0.522334	0.000313886	0.01742
204477_at	RABIF	-0.265644	0.00153333	0.0437146
204526_s_at	TBC1D8	0.330933	0.00158096	0.0445718
204527_at	MYO5A	-0.583017	0.000368226	0.0186657
204530_s_at	TOX	0.599149	0.00118517	0.0375625
204538_x_at	NPIPA1	0.664947	2.23415e-05	0.00430223
204552_at	INPP4A	-0.541968	0.00162425	0.045027
204559_s_at	LSM7	-0.504055	1.86188e-05	0.00399564
204560_at	FKBP5	0.909071	0.00111979	0.036427
204568_at	ATG14	0.382731	0.000102072	0.00968239
204593_s_at	MIEF1	-0.340437	0.000207192	0.0143225
204599_s_at	MRPL28	-0.389311	0.000134202	0.0110473
204610_s_at	CCDC85B	-0.486086	0.000254228	0.0157108
204635_at	RPS6KA5	0.719386	5.34767e-06	0.00187538
204671_s_at	ANKRD6	-0.589937	2.8148e-05	0.00483731
204675_at	SRD5A1	-0.768116	1.15627e-05	0.00287677
204678_s_at	KCNK1	-0.909776	7.24486e-05	0.00797212
204716_at	CCDC6	-0.473723	0.000621449	0.0256631
204723_at	SCN3B	-0.693853	2.76986e-05	0.00482907
204735_at	PDE4A	0.438747	0.000185759	0.0134442
204748_at	PTGS2	-0.65295	0.00156943	0.0443046
204784_s_at	MLF1	-0.389409	0.00158282	0.0445773
204791_at	NR2C1	0.600012	0.00163169	0.0452041
204797_s_at	EML1	-0.500772	0.000239515	0.0153433
204842_x_at	PRKAR2A	0.518678	0.00106796	0.035463
204990_s_at	ITGB4	0.612784	0.000112923	0.0101057
204996_s_at	CDK5R1	-0.535606	0.000198512	0.0139861
205036_at	LSM6	0.265218	0.00116726	0.0372135
205037_at	IFT27	-0.433598	0.000103792	0.00972909
205110_s_at	FGF13	-0.333051	0.00143846	0.0420252
205148_s_at	CLCN4	-0.55793	0.000121276	0.0105895
205166_at	CAPN5	-0.301057	0.00189634	0.0498773
205202_at	PCMT1	-0.397156	0.000334206	0.0178858
205241_at	SCO2	-0.492714	0.000664548	0.0266159
205293_x_at	BAIAP2	-0.448956	0.000285386	0.0167588
205301_s_at	OGG1	-0.331982	0.000617389	0.0255713
205330_at	MN1	-0.617598	3.02787e-05	0.00494224
205367_at	SH2B2	0.455774	0.000410368	0.019935
205370_x_at	DBT	0.607878	0.000249376	0.015608
205433_at	BCHE	-0.685554	0.000690312	0.0272301
205462_s_at	HPCAL1	-0.696536	0.000328998	0.0177743
205518_s_at	CMAHP	0.721686	0.000495264	0.0223465
205591_at	OLFM1	-0.537938	0.000238749	0.0153251
205625_s_at	CALB1	-1.93869	1.74046e-09	1.25125e-05
205626_s_at	CALB1	-2.20402	1.1546e-10	2.49019e-06
205630_at	CRH	-1.60238	0.000285562	0.0167588
205632_s_at	PIP5K1B	-0.643813	1.06566e-05	0.00277078
205687_at	UBFD1	-0.566239	0.000267929	0.0160653
205738_s_at	FABP3	-0.614558	0.0014167	0.0415708
205768_s_at	SLC27A2	-0.411476	0.000502788	0.022521
205827_at	CCK	-0.564059	0.000300408	0.0170992
205850_s_at	GABRB3	-1.01186	0.000822923	0.0300566
205874_at	ITPKA	-0.714041	5.89994e-06	0.00195902
205882_x_at	ADD3	0.672771	0.00103566	0.0347382
205883_at	ZBTB16	0.530803	0.000541681	0.0235065
205888_s_at	JAKMIP2	-0.339566	0.000830712	0.0301522
205899_at	CCNA1	-0.416017	0.00187592	0.0495516
205901_at	PNOC	-0.544179	0.000463081	0.0213899
205952_at	KCNK3	-0.66112	1.92673e-05	0.00408806
205981_s_at	ING2	-0.331472	0.00125243	0.038773
205984_at	CRHBP	-0.752834	0.000531652	0.0232348
206017_at	KIAA0319	0.331588	0.000385018	0.019222
206023_at	NMU	-0.642848	0.000281229	0.0165721
206045_s_at	NOL4	-0.554002	6.24574e-05	0.00746288
206075_s_at	CSNK2A1	-0.383714	0.000100703	0.00967443
206084_at	PTPRR	-0.80305	5.24727e-07	0.00041915
206115_at	EGR3	-0.724117	0.000404565	0.0198113
206116_s_at	TPM1	-0.482786	0.00129512	0.039521
206208_at	CA4	-0.697493	1.24592e-05	0.00301756
206209_s_at	CA4	-0.702431	0.000385954	0.0192242
206323_x_at	OPHN1	0.751271	2.42121e-05	0.00451401
206355_at	GNAL	-1.39117	0.000217334	0.014538
206356_s_at	GNAL	-0.898743	4.37183e-05	0.00598663
206382_s_at	BDNF	-0.863264	0.000565718	0.0241129
206384_at	CACNG3	-0.481926	8.35319e-05	0.00862988
206396_at	SLC1A1	-0.580289	0.000538984	0.0234365
206456_at	GABRA5	-0.813772	0.000108961	0.00995173
206460_at	AJAP1	-0.474079	3.67357e-05	0.00552124
206474_at	CDK17	-0.650066	0.000348349	0.0181913
206547_s_at	PPEF1	-0.697496	0.000342029	0.0180169
206577_at	VIP	-1.39078	3.27254e-06	0.00150171
206670_s_at	GAD1	-1.12149	0.000314468	0.01742
206673_at	GPR176	-0.496352	0.000263792	0.0160037
206731_at	CNKSR2	-0.578624	0.000499286	0.0224575
206888_s_at	ARHGDIG	-0.513077	0.000368278	0.0186657
206896_s_at	GNG7	-0.287329	0.00117046	0.0372655
206973_at	PPFIA2	-0.372837	0.00165045	0.045461
206976_s_at	HSPH1	-0.448438	0.000671233	0.0268189
207054_at	IMPG1	-0.515278	0.000453358	0.021111
207058_s_at	PRKN	-0.442247	0.000714001	0.0277714
207081_s_at	PI4KA	-0.43251	0.000718142	0.0278571
207088_s_at	SLC25A11	-0.36035	0.000342086	0.0180169
207103_at	KCND2	-0.595115	0.000740836	0.0282796
207124_s_at	GNB5	-0.735845	0.000101767	0.00968239
207142_at	KCNJ3	-0.763908	0.000207994	0.014331
207147_at	DLX2	-0.447334	0.000539824	0.0234494
207149_at	CDH12	-0.588564	0.000949555	0.0328684
207195_at	CNTN6	-0.435173	0.00128273	0.0392862
207348_s_at	LIG3	-0.269105	0.00183823	0.048765
207365_x_at	USP34	0.578043	0.000451921	0.021097
207435_s_at	SRRM2	0.349822	0.000397482	0.0196172
207436_x_at	SORBS1	0.5	0.00125752	0.0388562
207438_s_at	SNUPN	-0.314822	0.000415253	0.0200179
207483_s_at	CAND1	-0.445484	0.000919429	0.0322435
207527_at	KCNJ9	-0.760688	9.06969e-06	0.00252401
207547_s_at	FAM107A	0.790236	0.000791429	0.0293914
207598_x_at	XRCC2	0.504031	0.0012345	0.0385498
207627_s_at	TFCP2	-0.401901	0.00160434	0.0448551
207630_s_at	CREM	-0.551895	4.79889e-06	0.00182255
207668_x_at	PDIA6	-0.512642	5.05547e-05	0.00647086
207730_x_at	TNFAIP8L1	0.626614	0.000478621	0.0219398
207747_s_at	DOK4	-0.273061	0.000440674	0.0207908
207766_at	CDKL1	-0.362531	0.000346258	0.0181913
207791_s_at	RAB1A	-0.535626	4.94368e-05	0.0063846
207797_s_at	LRP2BP	0.416492	0.00120972	0.0379776
207873_x_at	SEZ6L	-0.319883	0.00144945	0.0421591
207996_s_at	LDLRAD4	-0.548563	0.000313064	0.0174021
208002_s_at	ACOT7	-0.699548	5.8069e-06	0.00195688
208092_s_at	CYRIA	-0.825603	6.8268e-05	0.00774932
208116_s_at	MAN1A1	-0.964684	1.87759e-06	0.00102519
208117_s_at	LAS1L	0.325018	0.000688914	0.0272301
208121_s_at	PTPRO	-0.750211	2.8083e-06	0.00139237
208123_at	KCNB2	-0.402781	0.00152852	0.04366
208124_s_at	SEMA4F	-0.355447	0.000930967	0.0324818
208243_s_at	CNR1	-0.45195	0.000212715	0.0144268
208290_s_at	EIF5	-0.790147	1.03615e-05	0.00277078
208351_s_at	MAPK1	-0.696467	0.000327692	0.0177575
208424_s_at	CIAPIN1	-0.619605	3.73015e-07	0.000336883
208447_s_at	PRPS1	-0.805917	0.000363798	0.0186368
208453_s_at	XPNPEP1	-0.301738	0.00145064	0.0421653
208465_at	GRM2	-0.434645	0.000186748	0.0134705
208614_s_at	FLNB	0.341814	0.000698454	0.027364
208638_at	PDIA6	-0.416729	2.70924e-05	0.00482469
208639_x_at	PDIA6	-0.400363	0.000612133	0.0254868
208675_s_at	DDOST	-0.294062	0.00114514	0.0367253
208679_s_at	ARPC2	-0.408512	3.47112e-05	0.00538585
208687_x_at	HSPA8	-0.545776	2.42882e-05	0.00451401
208708_x_at	EIF5	-0.604516	6.82098e-06	0.00213205
208721_s_at	ANAPC5	-0.590996	5.42336e-05	0.00686031
208744_x_at	HSPH1	-0.612145	0.000315001	0.01742
208750_s_at	ARF1	-0.572727	0.000137736	0.0111677
208761_s_at	SUMO1	-0.321055	0.000528953	0.0232243
208781_x_at	SNX3	-0.475658	1.04778e-07	0.000149501
208798_x_at	GOLGA8A	1.19064	1.7255e-05	0.00378224
208815_x_at	HSPA4	-0.402254	0.00080473	0.0296637
208833_s_at	ATXN10	-0.278225	0.000439143	0.0207604
208837_at	TMED3	-0.443927	0.000394051	0.0194924
208838_at	CAND1	-0.418301	9.94112e-06	0.00269692
208839_s_at	CAND1	-0.418472	7.50058e-05	0.00812908
208840_s_at	G3BP2	-0.946438	0.00181421	0.0483551
208850_s_at	THY1	-0.889109	7.80998e-07	0.000598637
208851_s_at	THY1	-0.340766	0.00178131	0.0478922
208854_s_at	STK24	-0.281969	0.00119332	0.0376546
208857_s_at	PCMT1	-0.50972	0.00107811	0.0355808
208872_s_at	REEP5	-0.609559	0.000276371	0.0163754
208877_at	PAK2	0.408225	0.00163817	0.0452963
208882_s_at	UBR5	0.60648	0.000483424	0.0220661
208884_s_at	UBR5	0.268337	0.00135356	0.0405458
208890_s_at	PLXNB2	0.460642	0.000324132	0.0176533
208909_at	UQCRFS1	-0.41154	0.000336612	0.0179194
208938_at	PRCC	-0.375942	0.00128231	0.0392862
208973_at	ERI3	-0.411547	6.46164e-05	0.00759463
208978_at	CRIP2	-0.580751	1.24781e-05	0.00301756
209018_s_at	PINK1	-0.343887	0.0003801	0.0190646
209022_at	STAG2	0.484724	0.00188739	0.0497633
209036_s_at	MDH2	-0.389001	0.000533431	0.023289
209076_s_at	WDR45B	0.305701	6.69574e-05	0.00773887
209083_at	CORO1A	-0.506908	3.20855e-05	0.00508478
209102_s_at	HBP1	0.481153	0.000648059	0.026284
209104_s_at	NHP2	-0.335013	0.000855373	0.0307337
209118_s_at	TUBA1A	-0.353188	3.30665e-05	0.00520557
209157_at	DNAJA2	-0.366067	0.000682912	0.0270748
209188_x_at	DR1	-0.388548	0.0011332	0.0366946
209198_s_at	SYT11	-0.4379	0.00106223	0.0353544
209227_at	TUSC3	-0.792856	2.127e-05	0.00420505
209228_x_at	TUSC3	-0.647953	0.0001503	0.0116388
209273_s_at	ISCA1	-0.565456	2.04e-05	0.00419539
209364_at	BAD	-0.441496	3.6582e-05	0.00552124
209393_s_at	EIF4E2	-0.408423	0.000893386	0.0317432
209444_at	RAP1GDS1	-0.487614	2.14028e-05	0.00420505
209447_at	SYNE1	0.46578	0.00141971	0.0416309
209452_s_at	VTI1B	-0.315002	3.33024e-05	0.00520907
209541_at	IGF1	-0.824622	0.000129043	0.0108716
209558_s_at	HIP1R	0.567353	0.000144416	0.0113675
209576_at	GNAI1	-0.697696	0.000150831	0.0116388
209582_s_at	CD200	-0.566105	0.000799724	0.029585
209584_x_at	APOBEC3C	0.307716	0.00170806	0.0465616
209615_s_at	PAK1	-1.13254	9.24064e-05	0.00918422
209683_at	CYRIA	-0.50342	0.00060642	0.0253223
209685_s_at	PRKCB	-0.353451	0.0016652	0.0457505
209705_at	MTF2	0.47447	0.000650378	0.0263171
209793_at	GRIA1	-0.316607	0.000998878	0.0338998
209822_s_at	VLDLR	-0.593801	5.44447e-05	0.00686688
209824_s_at	ARNTL	-0.308921	0.00123766	0.0385498
209825_s_at	UCK2	-0.323063	0.00101873	0.0343119
209853_s_at	PSME3	-0.430216	3.55307e-05	0.00545657
209869_at	ADRA2A	-0.683388	4.45288e-05	0.00605413
209875_s_at	SPP1	1.79473	0.000760562	0.0287954
209889_at	SEC31B	0.426636	2.05755e-05	0.00420505
209907_s_at	ITSN2	0.40673	0.000134113	0.0110473
209934_s_at	ATP2C1	-0.331377	5.66501e-05	0.00702185
209965_s_at	RAD51D	-0.299722	0.000960271	0.0330262
209992_at	PFKFB2	0.402291	0.000162068	0.0121405
210009_s_at	GOSR2	-0.570828	2.26858e-07	0.000257513
210056_at	RND1	-0.427498	0.000158348	0.0119508
210104_at	MED6	-0.356429	0.00167638	0.0459277
210115_at	RPL39L	-0.370694	0.000725068	0.0279277
210156_s_at	PCMT1	-0.617198	0.000958207	0.0330113
210182_at	CORT	-0.564457	3.9074e-05	0.00565876
210186_s_at	FKBP1A	-0.61025	0.000587126	0.024708
210231_x_at	SET	0.490315	0.000529257	0.0232243
210243_s_at	B4GALT3	-0.432797	5.10024e-07	0.000415092
210263_at	KCNF1	-0.532179	0.000142868	0.0113492
210277_at	AP4S1	-0.501231	0.000139594	0.0111922
210278_s_at	AP4S1	-0.863368	8.31763e-07	0.000598637
210285_x_at	WTAP	-0.522665	0.000837551	0.0302831
210315_at	SYN2	-1.03256	0.000354581	0.0184275
210338_s_at	HSPA8	-0.700545	2.72119e-05	0.00482469
210349_at	CAMK4	-0.383501	0.000775483	0.0291127
210355_at	PTHLH	-0.419603	6.67743e-06	0.00211787
210408_s_at	CPNE6	-0.495117	0.000404335	0.0198113
210448_s_at	P2RX5	-0.457712	0.000145652	0.0114439
210465_s_at	SNAPC3	-0.675362	4.93648e-05	0.0063846
210534_s_at	B9D1	-0.59756	9.67023e-05	0.00943953
210552_s_at	RALGPS1	-0.305775	0.00124707	0.0387554
210602_s_at	CDH6	-0.358379	0.00128358	0.0392862
210622_x_at	CDK10	-0.315621	0.000659554	0.0264898
210639_s_at	ATG5	-0.507335	0.00120123	0.0377935
210648_x_at	SNX3	-0.432823	1.95856e-08	4.44645e-05
210675_s_at	PTPRR	-0.776006	2.25133e-07	0.000257513
210691_s_at	CACYBP	-0.557149	0.00135302	0.0405458
210721_s_at	PAK5	-0.606477	0.000809369	0.0297321
210740_s_at	ITPK1	0.33577	0.000555663	0.023873
210787_s_at	CAMKK2	-1.26075	2.92846e-05	0.00489609
210817_s_at	CALCOCO2	0.584255	6.1334e-05	0.00739007
210820_x_at	COQ7	-0.306495	0.000234961	0.015195
210829_s_at	SSBP2	-0.368566	2.12309e-05	0.00420505
210880_s_at	EFS	0.348636	0.00117146	0.0372655
210933_s_at	FSCN1	-0.485506	8.36279e-05	0.00862988
210959_s_at	SRD5A1	-0.549125	0.0012365	0.0385498
210968_s_at	RTN4	-0.369557	0.000395308	0.0195322
210971_s_at	ARNTL	-0.589301	0.0015353	0.0437417
211016_x_at	HSPA4	-0.566323	0.000589036	0.0247642
211021_s_at	RGS14	-0.427455	0.00165968	0.0456572
211040_x_at	GTSE1	0.376488	0.00146773	0.0424692
211075_s_at	CD47	-0.553096	0.000691832	0.0272301
211150_s_at	DLAT	-0.527514	0.000129334	0.0108749
211159_s_at	PPP2R5D	-0.418008	0.00085598	0.0307337
211185_s_at	SF3B1	0.322867	0.000156204	0.0118415
211299_s_at	FLOT2	-0.386995	0.000194116	0.0137491
211316_x_at	CFLAR	0.44828	0.000519038	0.0229393
211382_s_at	TACC2	-0.432071	0.000635607	0.0260369
211431_s_at	TYRO3	-0.614848	7.35626e-07	0.000576932
211452_x_at	LRRFIP1	0.568987	0.000829714	0.0301514
211520_s_at	GRIA1	-0.788665	9.79972e-06	0.00267538
211555_s_at	GUCY1B1	-0.647619	0.00155063	0.0439827
211558_s_at	DHPS	-0.307569	0.000744172	0.0282917
211586_s_at	ATP2B2	-0.80206	0.00144714	0.0421217
211595_s_at	MRPS11	-0.307504	0.0009282	0.0324818
211597_s_at	HOPX	-0.477383	0.000289342	0.0168431
211676_s_at	IFNGR1	0.652784	0.000349249	0.0182163
211713_x_at	PCLAF	0.486867	0.000400105	0.0197241
211725_s_at	BID	-0.517768	3.72927e-05	0.00554696
211812_s_at	B3GALNT1	-0.769225	0.000127496	0.0108461
211855_s_at	SLC25A14	-0.50962	9.01841e-06	0.00252401
211925_s_at	PLCB1	-0.754963	0.000318485	0.0175303
211938_at	EIF4B	0.308549	0.000697831	0.027364
211976_at	NUDT3	0.281051	0.0015194	0.0436058
211986_at	AHNAK	0.618817	0.00100687	0.0340305
212009_s_at	STIP1	-0.947301	2.81891e-07	0.000288772
212041_at	ATP6V0D1	-0.535111	4.10314e-06	0.00166971
212080_at	KMT2A	0.517422	0.00123353	0.0385498
212088_at	PMPCA	-0.291217	0.000368186	0.0186657
212117_at	RHOQ	0.441742	0.000787335	0.0293914
212119_at	RHOQ	0.469268	0.000657991	0.0264824
212120_at	RHOQ	0.609166	6.68866e-05	0.00773887
212125_at	RANGAP1	-0.594985	3.75131e-05	0.00556058
212126_at	CBX5	0.330139	0.000929703	0.0324818
212134_at	PHLDB1	0.298611	0.00126725	0.0390448
212144_at	SUN2	0.460477	8.54728e-06	0.00245791
212176_at	PNISR	0.606004	0.00160629	0.0448694
212234_at	ASXL1	0.274795	0.000428832	0.0205074
212254_s_at	DST	0.32604	0.000479231	0.0219444
212255_s_at	ATP2C1	-0.4312	0.00130781	0.0396788
212271_at	MAPK1	-0.354544	0.000943633	0.0327437
212274_at	LPIN1	0.428636	0.000267329	0.0160602
212288_at	FNBP1	0.542252	0.000697952	0.027364
212299_at	NEK9	0.462247	4.78257e-05	0.00627596
212306_at	CLASP2	-0.416086	0.00160241	0.0448551
212311_at	SEL1L3	-0.455983	0.000351448	0.0182867
212314_at	SEL1L3	-0.586568	0.00139679	0.0412675
212325_at	LIMCH1	-0.485742	0.000885999	0.0315848
212339_at	EPB41L1	0.46321	0.000217619	0.014538
212343_at	YIPF6	0.317427	0.00159436	0.0447448
212355_at	KHNYN	0.396479	0.0018787	0.0495946
212364_at	MYO1B	-0.566477	0.00045273	0.021111
212365_at	MYO1B	-0.474233	9.5321e-05	0.00938738
212410_at	MICU2	0.396774	0.000675931	0.0269466
212411_at	IMP4	-0.274397	0.00127897	0.0392651
212432_at	GRPEL1	-0.377956	0.000258267	0.0158438
212445_s_at	NEDD4L	-0.600904	0.0009588	0.0330113
212454_x_at	HNRNPDL	0.68602	5.03359e-06	0.00185576
212461_at	AZIN1	-0.44401	0.000409293	0.0199265
212485_at	GPATCH8	0.38548	2.83966e-05	0.00484739
212487_at	GPATCH8	0.474409	0.000331683	0.0178154
212494_at	TNS2	0.430797	0.000255259	0.0157519
212500_at	ADO	-0.398916	0.000551583	0.0237214
212502_at	ADO	-0.286198	0.00101002	0.0340636
212548_s_at	FRYL	0.432934	0.000488759	0.0221798
212551_at	CAP2	-0.571606	0.000212149	0.0144202
212553_at	RPRD2	0.409199	0.00130023	0.0395804
212572_at	STK38L	0.404707	0.00106339	0.0353658
212586_at	CAST	0.435803	0.000564027	0.0241123
212646_at	RFTN1	-0.320104	0.00188084	0.0496207
212669_at	CAMK2G	0.403684	0.000720729	0.0279072
212704_at	TUT4	0.370955	0.00103697	0.034755
212711_at	CAMSAP1	-0.354184	0.000123507	0.0106977
212712_at	CAMSAP1	-0.472126	2.07973e-05	0.00420505
212726_at	PHF2	0.320639	0.00119826	0.0377491
212729_at	DLG3	-0.493095	0.000192603	0.0136868
212757_s_at	CAMK2G	0.37007	0.000147095	0.0115094
212772_s_at	ABCA2	0.552869	0.000270031	0.0161326
212784_at	CIC	0.343893	0.000501593	0.0225143
212795_at	WASHC4	0.409247	0.00172417	0.0468339
212805_at	PRUNE2	0.269236	0.0012507	0.0387618
212829_at	PIP4K2A	0.657352	0.000632843	0.0259484
212852_s_at	RO60	0.58303	0.000753732	0.0285948
212854_x_at	NBPF1	0.579531	5.90943e-06	0.00195902
212857_x_at	SUB1	-0.334666	0.000894996	0.0317622
212866_at	R3HCC1	-0.34408	0.000891869	0.0317176
212943_at	C2CD5	0.324468	0.000167974	0.0124524
212976_at	LRRC8B	-0.669899	0.00014077	0.0112447
212994_at	THOC2	0.336392	0.00120468	0.0378746
213047_x_at	SET	-0.284073	0.00112713	0.0365442
213061_s_at	NTAN1	-0.37838	0.000986929	0.0336721
213072_at	CYHR1	-0.339009	0.00107632	0.0355763
213074_at	PHIP	0.558885	0.000543831	0.023576
213096_at	TMCC2	0.395945	6.78863e-05	0.00774168
213104_at	TSR3	-0.410379	0.000733714	0.0280592
213124_at	ZNF473	-0.327961	0.00113572	0.0366946
213131_at	OLFM1	-0.591949	1.02165e-06	0.000682039
213132_s_at	MCAT	-0.35308	0.000596965	0.0249758
213144_at	GOSR2	-0.392056	0.000339656	0.0179797
213185_at	KATNIP	0.293095	0.000154951	0.0117902
213219_at	ADCY2	-0.959903	8.32694e-07	0.000598637
213305_s_at	PPP2R5C	-0.471668	6.2914e-05	0.00749668
213309_at	PLCL2	-0.516213	0.000143295	0.0113573
213325_at	NECTIN3	-1.25004	5.35702e-08	8.8875e-05
213327_s_at	USP12	-0.348303	0.000154059	0.0117709
213330_s_at	STIP1	-0.396386	0.000628273	0.0258013
213333_at	MDH2	-0.324724	0.000891048	0.0317176
213338_at	TMEM158	-0.568227	0.000591516	0.0248201
213375_s_at	N4BP2L1	0.444346	2.92641e-05	0.00489609
213423_x_at	TUSC3	-0.520332	0.00111267	0.036255
213428_s_at	COL6A1	0.489119	0.000149011	0.0116021
213436_at	CNR1	-0.574575	0.000209935	0.0143739
213438_at	NFASC	0.463712	2.14469e-05	0.00420505
213447_at	IPW	0.336951	0.00118912	0.037622
213465_s_at	PPP1R7	-0.461564	5.71841e-06	0.00194853
213466_at	RAB40C	-0.343838	0.00174316	0.047243
213486_at	COPG2IT1	0.387767	0.00140215	0.0413127
213489_at	MAPRE2	-0.48018	1.30178e-06	0.000802175
213496_at	PLPPR4	-0.724451	2.88745e-06	0.00139944
213510_x_at	USP32P2	0.446016	0.000936104	0.0325373
213532_at	ADAM17	0.486494	0.000339475	0.0179797
213538_at	SON	0.288652	0.00071564	0.027785
213545_x_at	SNX3	-0.365697	3.00113e-05	0.00494224
213548_s_at	CDV3	-0.509298	0.00125303	0.038773
213552_at	GLCE	-0.536026	0.000296411	0.0170435
213589_s_at	B3GNTL1	-0.321001	0.00165821	0.0456457
213609_s_at	SEZ6L	-0.313964	0.00129553	0.039521
213616_at	TPGS2	-0.685412	8.87274e-06	0.00251774
213617_s_at	TPGS2	-0.502208	4.55564e-05	0.00610272
213664_at	SLC1A1	-0.453042	0.000243275	0.0154092
213696_s_at	MED8	-0.318862	0.00114078	0.0366946
213737_x_at	GOLGA8N	0.777163	4.51138e-07	0.000389196
213791_at	PENK	-0.935778	3.82352e-05	0.00564197
213793_s_at	HOMER1	-0.624883	0.000124522	0.0107093
213799_s_at	PTPRA	-0.517023	0.000463155	0.0213899
213887_s_at	POLR2E	-0.480672	0.00013536	0.0110792
213921_at	SST	-1.54161	0.000849348	0.0305815
213924_at	GNAL	-0.563147	7.83294e-06	0.00233226
213938_at	ERC2	-0.415332	0.00114439	0.0367253
214011_s_at	NOP16	-0.310622	7.19294e-05	0.00797212
214016_s_at	SFPQ	0.923809	7.68949e-05	0.00817705
214071_at	GNAL	-0.694861	0.00034099	0.0180032
214241_at	NDUFB8	0.514325	0.00015418	0.0117709
214260_at	COPS8	-0.613931	1.28409e-05	0.00306018
214270_s_at	MAPRE3	-0.677125	0.00171887	0.0467487
214285_at	FABP3	-0.617909	0.000365521	0.0186368
214293_at	SEPTIN11	-0.394092	0.00125054	0.0387618
214318_s_at	FRY	-0.637358	0.000205295	0.0142599
214323_s_at	UPF3A	0.467598	0.00186857	0.0494179
214359_s_at	HSP90AB1	-0.422118	0.000882322	0.0314797
214361_s_at	RGS12	-0.295329	0.00189603	0.0498773
214365_at	TPM3	-0.35126	0.000414165	0.0200179
214372_x_at	ERN2	0.363934	0.00125456	0.0387925
214500_at	MACROH2A1	-0.378033	0.00114304	0.0367126
214507_s_at	EXOSC2	-0.418949	0.000320292	0.0175773
214508_x_at	CREM	-0.306658	0.00036291	0.0186368
214512_s_at	SUB1	-0.44007	0.000127805	0.0108461
214553_s_at	ARPP19	-0.981727	2.68328e-06	0.00134585
214595_at	KCNG1	-1.15327	4.55644e-08	8.18874e-05
214611_at	GRIK1	-0.475781	0.000229573	0.0151185
214649_s_at	MTMR2	-0.425637	0.00155414	0.0440169
214652_at	DRD1	-0.573816	0.000507887	0.0225878
214656_x_at	MYO1C	0.469896	0.00178226	0.0478922
214661_s_at	NOP14	0.29555	0.00111282	0.036255
214671_s_at	ABR	-0.562279	2.10966e-05	0.00420505
214683_s_at	CLK1	0.996053	0.000722022	0.0279272
214707_x_at	ALMS1	0.579307	0.00107632	0.0355763
214733_s_at	YIPF1	-0.326284	0.000470281	0.0216495
214772_at	KIAA1549L	-0.785176	4.21669e-05	0.00589187
214774_x_at	TOX3	-0.657233	0.000233205	0.0151708
214780_s_at	MYO9B	0.29859	0.000363424	0.0186368
214785_at	VPS13A	0.608648	0.00167697	0.0459277
214811_at	RIMBP2	-0.612659	2.46358e-05	0.0045413
214844_s_at	DOK5	-0.568905	3.51109e-06	0.00151451
214874_at	PKP4	-0.385381	0.000250157	0.015608
214913_at	ADAMTS3	-0.582128	0.000958703	0.0330113
214930_at	SLITRK5	-0.420617	0.000347984	0.0181913
214931_s_at	SRPK2	-0.438144	0.00149224	0.0429404
214939_x_at	AFDN	-0.316651	0.00167074	0.0458443
214959_s_at	API5	-0.585114	0.000536216	0.0233708
214965_at	SPATA2L	-0.606333	0.000278979	0.0164846
215016_x_at	DST	0.306003	0.000764008	0.0288256
215063_x_at	LRRC40	0.4864	0.00019007	0.013618
215067_x_at	PRDX2	0.540621	0.000292929	0.0169634
215084_s_at	LRRC42	-0.297523	0.000531038	0.0232316
215108_x_at	TOX3	-0.550129	0.000237511	0.0152883
215119_at	MYO16	-0.310943	0.000465719	0.0214853
215171_s_at	TIMM17A	-0.396128	5.85396e-05	0.00717551
215179_x_at	PGF	0.610074	0.000364897	0.0186368
215227_x_at	ACP1	-0.437805	0.00135872	0.0406157
215235_at	SPTAN1	0.28232	0.00119894	0.0377491
215241_at	ANO3	-0.620003	0.000804981	0.0296637
215253_s_at	RCAN1	-0.449029	5.52614e-05	0.00690927
215380_s_at	GGCT	-0.490779	6.22744e-05	0.00746168
215416_s_at	STOML2	-0.293139	0.000407055	0.0198848
215519_x_at	SGSM3	-0.359557	0.000246354	0.0155105
215529_x_at	DIP2A	0.541643	0.00101898	0.0343119
215531_s_at	GABRA5	-1.24674	4.78786e-05	0.00627596
215543_s_at	LARGE1	-0.324917	0.00134832	0.0405013
215548_s_at	SCFD1	-0.306351	0.000489	0.0221798
215588_x_at	RIOK3	0.644896	0.000251744	0.0156695
215600_x_at	FBXW12	0.639189	0.000684783	0.0271241
215645_at	FLCN	0.423606	0.00180443	0.0481944
215664_s_at	EPHA5	-0.546425	0.000658147	0.0264824
215696_s_at	SEC16A	0.313329	0.00032231	0.0175985
215728_s_at	ACOT7	-0.728694	3.18844e-05	0.00508478
215767_at	ZNF804A	-0.646582	7.12258e-06	0.00219452
215913_s_at	GULP1	-0.502494	0.00171512	0.0466761
215952_s_at	OAZ1	-0.446754	9.7972e-07	0.000679697
215984_s_at	ARFRP1	-0.408907	7.22807e-05	0.00797212
216048_s_at	RHOBTB3	0.984393	6.69573e-05	0.00773887
216095_x_at	MTMR1	0.292173	0.00140153	0.0413127
216120_s_at	ATP2B2	-0.764015	0.00162326	0.045027
216153_x_at	RECK	0.609201	0.000162117	0.0121405
216218_s_at	PLCL2	-1.08373	3.20292e-06	0.0014952
216248_s_at	NR4A2	-0.913151	0.00146898	0.0424696
216266_s_at	ARFGEF1	-0.439936	0.00183574	0.048729
216307_at	DGKB	-1.22608	3.38996e-09	1.82782e-05
216389_s_at	DCAF11	-0.332682	0.000303448	0.0170992
216602_s_at	FARSA	-0.514527	0.000176605	0.0129321
216623_x_at	TOX3	-0.668014	0.000240705	0.0153592
216640_s_at	PDIA6	-0.513662	1.34233e-05	0.00316402
216834_at	RGS1	2.15207	0.000216528	0.014538
216933_x_at	APC	0.5396	0.0018012	0.0481849
216985_s_at	STX3	-0.351419	0.00146439	0.0424692
217118_s_at	KIAA0930	0.565671	0.000108021	0.00989382
217140_s_at	VDAC1	-0.638941	0.00012608	0.0107479
217188_s_at	ERG28	-0.485549	5.21133e-06	0.00187538
217220_at	LOC100287387	-0.37049	0.00116695	0.0372135
217309_s_at	VPS26C	-0.370807	0.000381906	0.0191138
217367_s_at	ZHX3	0.506924	3.44092e-06	0.00151451
217457_s_at	RAP1GDS1	-0.560469	0.000437076	0.0207407
217526_at	NFATC2IP	0.453817	0.000118184	0.0103826
217553_at	STEAP1B	-0.269133	0.00136497	0.0407461
217556_at	CLCN4	-0.716805	0.000815251	0.0298522
217562_at	BRINP3	-0.551821	0.000389928	0.0193106
217681_at	WNT7B	-0.348386	6.76521e-05	0.00774052
217720_at	CHCHD2	-0.266193	0.00127474	0.0391917
217745_s_at	NAA50	-0.286159	0.000303318	0.0170992
217755_at	JPT1	-0.692	3.40322e-07	0.000326217
217781_s_at	ZNF106	0.372078	0.000560175	0.024019
217785_s_at	YKT6	-0.632785	7.00057e-05	0.00784337
217786_at	PRMT5	-0.386988	7.95283e-05	0.00832635
217787_s_at	GALNT2	-0.555134	0.000790512	0.0293914
217802_s_at	NUCKS1	0.443939	9.57616e-05	0.00940928
217807_s_at	NOP53	0.493705	0.0018132	0.0483551
217808_s_at	MAPKAP1	-0.35301	0.000137396	0.0111629
217810_x_at	LARS1	0.510586	0.000702599	0.0274765
217833_at	SYNCRIP	0.35525	0.00176934	0.04776
217860_at	NDUFA10	-0.337215	4.04534e-05	0.00575894
217866_at	CPSF7	0.410639	7.38512e-08	0.000117984
217883_at	MMADHC	-0.34568	4.28314e-05	0.00589651
217899_at	TMEM214	0.268187	0.000547857	0.0236603
217908_s_at	DCAF6	-0.519745	0.000102718	0.00969531
217909_s_at	MLX	-0.331785	0.000204209	0.0142599
217914_at	TPCN1	0.373165	0.00112444	0.0365232
217915_s_at	RSL24D1	-0.411028	0.00100593	0.0340305
217923_at	PEF1	-0.44284	3.10055e-06	0.00146969
217930_s_at	TOLLIP	-0.769095	5.24572e-06	0.00187538
217932_at	MRPS7	-0.339252	0.000334696	0.0178898
217941_s_at	ERBIN	0.792726	0.000903791	0.0318765
217968_at	EIPR1	-0.300398	0.000427712	0.0204765
217971_at	LAMTOR3	-0.291077	0.00129805	0.039542
217976_s_at	DYNC1LI1	-0.49423	0.000174406	0.012816
218001_at	MRPS2	-0.382474	0.000761973	0.0287992
218002_s_at	CXCL14	-0.804402	0.000873174	0.0312717
218026_at	COA3	-0.356648	5.85294e-05	0.00717551
218033_s_at	SNN	-0.442424	0.00117149	0.0372655
218047_at	OSBPL9	0.340573	0.00156591	0.0442923
218067_s_at	ARGLU1	0.555168	0.0015689	0.0443046
218093_s_at	ANKRD10	0.455671	0.00102898	0.0345949
218100_s_at	IFT57	-0.382036	0.000613914	0.0254872
218109_s_at	MFSD1	0.507973	0.000477824	0.0219265
218120_s_at	HMOX2	-0.576323	6.88476e-06	0.0021365
218155_x_at	TSR1	0.523192	0.000139549	0.0111922
218159_at	DDRGK1	-0.419631	0.000241801	0.0153836
218163_at	MCTS1	-0.584779	7.65234e-05	0.00817705
218188_s_at	TIMM13	-0.46418	2.41055e-05	0.00451401
218209_s_at	RPRD1A	-0.560078	0.00010107	0.00968239
218214_at	ATG101	-0.531115	4.05142e-08	8.18874e-05
218217_at	SCPEP1	0.386848	8.45299e-05	0.00867116
218219_s_at	LANCL2	-0.570267	1.51089e-05	0.00344826
218224_at	PNMA1	-0.30649	0.00160349	0.0448551
218225_at	ECSIT	-0.301861	0.00138714	0.0411515
218231_at	NAGK	-0.275109	0.000873591	0.0312717
218260_at	DDA1	-0.449957	0.00127116	0.0391374
218295_s_at	NUP50	-0.697932	1.22254e-05	0.00299993
218309_at	CAMK2N1	-0.313201	0.00136783	0.0407749
218318_s_at	NLK	-0.511388	0.000991714	0.0337097
218364_at	LRRFIP2	0.391674	3.60579e-05	0.00548689
218386_x_at	USP16	0.28216	0.000450028	0.0210542
218396_at	VPS13C	1.16358	1.06528e-05	0.00277078
218428_s_at	REV1	0.448668	0.00108894	0.0357559
218434_s_at	AACS	-0.31905	0.0012918	0.0394629
218471_s_at	BBS1	0.409692	0.000188947	0.0135837
218541_s_at	TCIM	-0.566218	0.000381965	0.0191138
218552_at	ECHDC2	0.49638	0.000278017	0.0164503
218611_at	IER5	-0.572758	6.43396e-05	0.00759463
218623_at	NSG2	-0.457327	0.000110787	0.0100184
218648_at	CRTC3	0.384394	0.000105821	0.00977427
218652_s_at	PIGG	0.395792	0.000146746	0.0115089
218667_at	PJA1	-0.397704	2.10776e-05	0.00420505
218695_at	EXOSC4	-0.314862	0.00030129	0.0170992
218788_s_at	SMYD3	-0.504447	0.00012993	0.0109038
218801_at	UGGT2	0.461483	0.000982309	0.0335975
218811_at	ORAI2	-0.304957	0.000787098	0.0293914
218813_s_at	SH3GLB2	-0.592761	8.56e-05	0.00874232
218841_at	ASB8	-0.409171	4.26221e-05	0.00589264
218866_s_at	POLR3K	-0.508937	1.61737e-05	0.00361447
218868_at	ACTR3B	-0.982436	3.28479e-11	1.41689e-06
218888_s_at	NETO2	-0.969137	1.24235e-08	4.38637e-05
218890_x_at	MRPL35	-0.393574	0.000433015	0.0206616
218923_at	CTBS	0.564946	0.000205132	0.0142599
218942_at	PIP4K2C	-0.448366	0.000105728	0.00977427
218974_at	SOBP	-0.406872	0.000195411	0.0138182
218982_s_at	MRPS17	-0.510013	4.22872e-06	0.00170473
218983_at	C1RL	0.550209	0.0010419	0.034866
218996_at	TFPT	-0.379575	0.0002985	0.0170992
219022_at	C12orf43	-0.425346	0.000527539	0.0231961
219093_at	PID1	-0.481581	2.1358e-05	0.00420505
219099_at	TIGAR	-0.576657	0.000150004	0.0116388
219103_at	ASAP3	0.330223	0.00160076	0.0448551
219105_x_at	ORC6	0.360792	0.000107861	0.00989382
219143_s_at	RPP25	-0.362614	0.0018177	0.0483992
219176_at	MAIP1	-0.416054	0.000150625	0.0116388
219179_at	DACT1	-0.57017	0.000230574	0.0151281
219203_at	EMC9	-0.305452	0.00052265	0.0230752
219204_s_at	SRR	-0.479371	0.000446205	0.0209403
219207_at	EDC3	-0.316116	0.000960888	0.0330262
219219_at	TMEM160	-0.576825	5.22605e-05	0.00666939
219260_s_at	ELP5	-0.440996	3.92609e-05	0.00565876
219326_s_at	B3GNT2	-0.55513	8.77551e-05	0.0088442
219369_s_at	OTUB2	-0.327804	0.000329238	0.0177743
219378_at	NAA16	0.595824	0.000169388	0.0125327
219392_x_at	PRR11	0.697677	0.000137342	0.0111629
219402_s_at	DERL1	-0.527871	6.30281e-06	0.00201565
219439_at	C1GALT1	-0.320262	0.0016141	0.0449187
219449_s_at	TMEM70	-0.358379	0.00026202	0.0159574
219501_at	ENOX1	-0.434384	0.000319384	0.0175499
219532_at	ELOVL4	-0.44208	0.000104764	0.00973999
219553_at	NME7	-0.508118	0.000137418	0.0111629
219645_at	CASQ1	-0.541383	0.00129684	0.0395331
219671_at	HPCAL4	-0.461496	0.00034685	0.0181913
219675_s_at	UXS1	-0.422469	6.56553e-05	0.00767491
219678_x_at	DCLRE1C	0.437955	0.000579041	0.0244393
219709_x_at	ANTKMT	-0.410474	0.00115995	0.0371451
219736_at	TRIM36	-0.603868	0.000227846	0.0150507
219931_s_at	KLHL12	-0.406541	0.00141327	0.0415269
219939_s_at	CSDE1	0.350963	0.000762459	0.0287992
219979_s_at	HIKESHI	-0.45391	0.00127246	0.0391495
219981_x_at	ZNF587	0.429006	0.00164998	0.045461
220030_at	STYK1	-1.19187	1.35825e-07	0.00017754
220044_x_at	LUC7L3	0.488697	0.00179743	0.0481567
220071_x_at	HAUS2	0.54633	0.00030559	0.0170992
220081_x_at	HSD17B7	0.455559	4.74444e-05	0.00625845
220097_s_at	TMEM104	0.270585	0.001439	0.0420252
220113_x_at	POLR1B	0.582315	0.000304882	0.0170992
220189_s_at	MGAT4B	-0.326356	0.00140694	0.0413971
220195_at	MBD5	0.272614	0.000708394	0.0276031
220232_at	SCD5	0.72531	0.000442528	0.0208335
220242_x_at	ZNF701	0.339217	0.000402565	0.0198023
220294_at	KCNV1	-0.902089	6.46096e-05	0.00759463
220331_at	CYP46A1	-0.742031	7.09503e-09	2.78222e-05
220343_at	PDE7B	-0.415961	2.23958e-07	0.000257513
220345_at	LRRTM4	-0.742565	0.000253314	0.0156993
220359_s_at	ARPP21	-0.627093	0.0003319	0.0178154
220411_x_at	PODNL1	0.308237	0.000977013	0.0334738
220448_at	KCNK12	-0.495453	0.000829184	0.0301514
220553_s_at	PRPF39	0.582865	0.000237822	0.0152883
220658_s_at	ARNTL2	-0.692959	0.000451583	0.021097
220677_s_at	ADAMTS8	-0.447287	0.000160752	0.0120802
220725_x_at	DNAH3	0.471548	0.000930274	0.0324818
220753_s_at	CRYL1	0.493539	0.000201357	0.0141228
220773_s_at	GPHN	-0.618099	1.08302e-05	0.00277078
220796_x_at	SLC35E1	0.565368	0.00128419	0.0392862
220874_at	EPB41	0.358279	0.00113782	0.0366946
220889_s_at	CA10	-1.02617	4.59892e-08	8.18874e-05
220917_s_at	WDR19	0.510003	7.31411e-05	0.00799675
220920_at	ATP10B	0.286138	0.000357327	0.0184591
221039_s_at	ASAP1	-0.567758	1.43305e-05	0.0033056
221082_s_at	NDRG3	-0.843012	0.000116855	0.010329
221094_s_at	ELP3	-0.348347	0.0002646	0.0160302
221246_x_at	TNS1	0.390059	0.000700026	0.0274007
221307_at	KCNIP1	-0.425877	0.000772406	0.0290477
221351_at	HTR1A	-0.283196	0.00082719	0.0301514
221418_s_at	MED16	-0.329033	0.000531036	0.0232316
221423_s_at	YIPF5	-0.524595	0.000152299	0.0116894
221425_s_at	ISCA1	-0.615064	3.85899e-05	0.00564262
221449_s_at	ITFG1	-0.637418	0.000305634	0.0170992
221471_at	SERINC3	-0.530274	1.89392e-08	4.44645e-05
221482_s_at	ARPP19	-0.530948	0.000208312	0.014331
221483_s_at	ARPP19	-0.325393	0.00156882	0.0443046
221487_s_at	ENSA	-0.757923	2.10614e-06	0.00110791
221530_s_at	BHLHE41	0.696455	0.000102626	0.00969531
221679_s_at	ABHD6	-0.475023	0.000996421	0.033843
221693_s_at	MRPS18A	-0.337466	0.000735406	0.0280972
221696_s_at	STYK1	-0.551279	0.000163334	0.0122105
221706_s_at	USE1	-0.342765	0.0016694	0.0458367
221725_at	WASF2	0.444652	0.000231717	0.0151281
221748_s_at	TNS1	0.754623	0.00137461	0.040864
221750_at	HMGCS1	-0.743849	6.23943e-06	0.00201565
221755_at	EHBP1L1	-0.461437	0.000154979	0.0117902
221760_at	MAN1A1	-0.847454	8.66522e-05	0.00880662
221764_at	R3HDM4	-0.343064	4.83252e-05	0.00629761
221803_s_at	NRBF2	-0.626654	8.57309e-05	0.00874232
221816_s_at	PHF11	0.481099	0.000387201	0.019264
221837_at	KLHL22	-0.612505	1.38683e-06	0.000830844
221847_at	SMIM10L1	-0.366501	0.00178963	0.0480371
221891_x_at	HSPA8	-0.440865	3.15689e-05	0.00506706
221899_at	N4BP2L2	1.55698	7.80212e-05	0.00820841
221904_at	FAM131A	-0.431671	0.00110815	0.0361574
221933_at	NLGN4X	-0.290906	0.00150702	0.043308
221937_at	SYNRG	0.378554	0.00170875	0.0465616
221943_x_at	RPL38	0.456869	0.00111896	0.036427
222005_s_at	GNG3	-0.613021	2.7151e-05	0.00482469
222035_s_at	PAPOLA	-0.569369	0.000147286	0.0115094
222104_x_at	GTF2H3	0.49987	0.00147509	0.0426176
222154_s_at	SPATS2L	-0.315155	0.000252394	0.0156874
222177_s_at	SCAND2P	-0.269835	0.000794047	0.0294399
222231_s_at	LRRC59	-0.475464	2.3432e-06	0.00121776
222252_x_at	UBQLN4	0.413374	0.00120723	0.0379269
222386_s_at	COPZ1	-0.4908	7.24396e-05	0.00797212
222387_s_at	VPS35	-0.701355	0.00118275	0.0375132
222396_at	JPT1	-0.437605	0.000179468	0.0130546
222427_s_at	LARS1	-0.289071	0.000628658	0.0258013
222442_s_at	ARL8B	-0.573829	0.00072254	0.0279272
222443_s_at	RBM8A	-0.33359	0.000336688	0.0179194
222447_at	METTL9	-0.357643	1.94286e-05	0.00408806
222458_s_at	AKIRIN1	-0.630046	7.32286e-05	0.00799675
222473_s_at	ERBIN	0.922565	0.000158403	0.0119508
222478_at	VPS36	-0.332582	0.00121212	0.0379923
222500_at	PPIL1	-0.523359	6.86098e-05	0.00776767
222502_s_at	UFM1	-0.484262	0.00174573	0.047243
222503_s_at	WDR41	-0.323284	0.000491132	0.0222298
222505_at	LMBR1	-0.435125	0.00137208	0.0408451
222519_s_at	IFT57	-0.458732	0.00012449	0.0107093
222534_s_at	INF2	-0.303814	0.000661939	0.026536
222555_s_at	MRPL44	-0.753344	2.0186e-06	0.00108678
222558_at	RPRD1A	-0.616192	0.000130624	0.0109407
222579_at	UBA5	-0.28798	0.00140117	0.0413127
222583_s_at	NUP50	-0.417733	0.000427554	0.0204765
222589_at	NLK	-0.509566	3.70877e-05	0.00553557
222590_s_at	NLK	-0.69587	0.00077758	0.0291407
222594_s_at	SPATS2	-0.319013	0.000563585	0.0241123
222605_at	RCOR3	0.464644	0.000302581	0.0170992
222613_at	C12orf4	-0.471099	0.000222706	0.0147338
222632_s_at	LZTFL1	-0.687168	3.68976e-05	0.00552631
222656_at	UBE2W	-0.464733	0.000311728	0.0173502
222658_s_at	APTX	-0.452605	2.76683e-05	0.00482907
222703_s_at	YRDC	-0.359349	0.00104334	0.0348872
222713_s_at	FANCF	-0.326405	0.000685468	0.0271263
222728_s_at	TAF1D	0.527328	0.00100842	0.034036
222754_at	TRNT1	-0.641561	5.51641e-06	0.00191896
222770_s_at	GUF1	-0.546847	0.00178312	0.0478922
222774_s_at	NETO2	-1.30319	1.01663e-09	1.24253e-05
222795_s_at	PLCXD1	-0.361545	0.000107011	0.00986305
222826_at	BLOC1S6	-0.770872	2.15615e-05	0.00420839
222870_s_at	B3GNT2	-0.466779	0.000143533	0.0113573
222927_s_at	CPLX3	-0.400062	0.000958922	0.0330113
222979_s_at	SURF4	-0.352098	0.000378968	0.0190522
222990_at	UBQLN1	-0.388422	0.000991551	0.0337097
222994_at	PRDX5	-0.327595	0.000291806	0.0169409
222999_s_at	CCNL2	0.714637	8.41315e-05	0.00866112
223020_at	CLPTM1L	-0.278068	0.00021763	0.014538
223021_x_at	VTA1	-0.828611	4.58455e-08	8.18874e-05
223022_s_at	VTA1	-0.297669	0.00113919	0.0366946
223054_at	DNAJB11	-0.31262	0.000459155	0.0212735
223081_at	PHF23	-0.27795	0.000516866	0.0228901
223094_s_at	ANKH	-0.355262	0.000864222	0.0309877
223101_s_at	ARPC5L	-0.395819	0.000805289	0.0296637
223125_s_at	C1orf21	-0.477458	4.94848e-07	0.000410486
223135_s_at	BBX	0.377445	0.000777007	0.0291407
223145_s_at	AKIRIN2	-0.402948	0.0013999	0.0413127
223151_at	DCUN1D5	-0.43994	2.7007e-07	0.000284133
223156_at	MRPS23	-0.523423	3.66457e-05	0.00552124
223168_at	RHOU	0.89113	0.000536389	0.0233708
223192_at	SLC25A28	0.312122	0.000765832	0.0288256
223225_s_at	SEH1L	-0.540988	0.00037526	0.018932
223226_x_at	SSBP4	-0.429297	1.11824e-05	0.00282077
223227_at	BBS2	0.47296	0.000790726	0.0293914
223239_at	GSKIP	-0.373387	8.81675e-05	0.00886505
223272_s_at	NTPCR	-0.375379	0.000141801	0.0113061
223334_at	TMEM126A	-0.337324	0.000318166	0.0175303
223374_s_at	B3GALNT1	-0.421079	0.000438038	0.0207407
223382_s_at	ZNRF1	-0.484568	1.25221e-05	0.00301756
223383_at	ZNRF1	-0.408583	0.00182849	0.0486262
223420_at	DNAJC14	-0.289321	0.000574642	0.0243263
223506_at	ZC3H8	-0.339769	0.000148688	0.011598
223550_s_at	CA10	-0.712429	1.3851e-06	0.000830844
223573_s_at	PPP2R2C	-0.86792	0.000641796	0.0261726
223611_s_at	LNX1	-0.481424	0.000437569	0.0207407
223619_x_at	PECR	0.382676	0.000935456	0.0325373
223621_at	PNMA3	0.417029	4.06703e-05	0.00577077
223650_s_at	NRBF2	-0.635207	8.84832e-06	0.00251774
223653_x_at	CELF4	-0.644599	0.00103858	0.034782
223662_x_at	DDX59	0.602295	0.000117857	0.0103826
223697_x_at	C9orf64	0.638137	0.000212283	0.0144202
223708_at	C1QTNF4	-0.862028	9.39068e-07	0.000664045
223721_s_at	DNAJC12	-0.445158	0.00113902	0.0366946
223735_at	ARL6	-0.764974	6.16849e-05	0.00741164
223743_s_at	MRPL4	-0.616228	0.000234771	0.015195
223821_s_at	SUSD4	-0.708757	0.00029446	0.0170262
223852_s_at	STK40	-0.43328	3.61256e-05	0.00548689
223960_s_at	CDIP1	0.341278	0.000233533	0.0151708
224025_s_at	ATG7	-0.309474	0.000493726	0.0223238
224159_x_at	TRIM4	0.757094	8.27199e-05	0.00857722
224187_x_at	HSPA8	-0.504671	1.05676e-05	0.00277078
224321_at	TMEFF2	0.869958	0.0004343	0.0206925
224352_s_at	CFL2	0.499873	0.000765337	0.0288256
224364_s_at	PPIL3	0.52631	0.000322136	0.0175985
224366_s_at	REPS1	0.407597	7.18105e-05	0.00797212
224368_s_at	NDRG3	-0.763413	0.000441025	0.0207908
224370_s_at	CAPS2	0.816969	0.000231702	0.0151281
224393_s_at	TMEM121B	-0.375042	0.000839637	0.0303331
224410_s_at	LMBR1	-0.604852	0.000573888	0.0243263
224413_s_at	TM2D2	-0.425159	4.49064e-05	0.00605413
224437_s_at	VTA1	-0.451601	9.92719e-07	0.000679697
224446_at	LLPH	-0.407788	4.26098e-05	0.00589264
224461_s_at	AIFM2	-0.364994	0.00163537	0.0452722
224476_s_at	MESP1	-0.420562	0.000788632	0.0293914
224484_s_at	BRMS1L	-0.57607	0.0013291	0.0400074
224493_x_at	TMEM241	0.40031	0.00026626	0.0160602
224506_s_at	PLPP7	-0.406199	3.83992e-05	0.00564197
224562_at	WASF2	0.636075	0.000103978	0.00972909
224567_x_at	MALAT1	1.47021	0.00189176	0.0498479
224583_at	COTL1	0.644534	0.000240085	0.0153433
224586_x_at	SUB1	-0.394784	9.43959e-05	0.00936038
224587_at	SUB1	-0.718821	2.6168e-07	0.00028219
224598_at	MGAT4B	-0.526558	2.29457e-05	0.00434107
224613_s_at	DNAJC5	-0.350918	0.000254172	0.0157108
224641_at	FYTTD1	-0.33779	0.000207844	0.014331
224647_at	CCNY	-0.338804	0.00140486	0.0413642
224649_x_at	CCNY	-0.646576	2.49856e-05	0.00458618
224650_at	MAL2	-0.904021	1.13035e-05	0.00283474
224667_x_at	ANAPC16	0.503223	0.000357122	0.0184591
224673_at	LENG8	0.629446	0.000210443	0.0143858
224685_at	AFDN	0.521973	9.47493e-05	0.00937027
224704_at	TNRC6A	0.609465	4.31847e-07	0.000380157
224705_s_at	TNRC6A	0.438067	0.000295962	0.0170435
224743_at	BPNT2	0.313765	0.00119211	0.0376449
224759_s_at	TMEM263	-0.280995	0.000908012	0.0319731
224782_at	ZMAT2	-0.428583	0.00012446	0.0107093
224784_at	MLLT6	0.463689	0.000404632	0.0198113
224794_s_at	CERCAM	0.692413	0.00117936	0.0374332
224796_at	ASAP1	-0.4109	0.000164978	0.012312
224798_s_at	FAM219B	-0.369272	0.000437104	0.0207407
224799_at	NDFIP2	-0.708069	0.000336911	0.0179194
224802_at	NDFIP2	-0.489528	0.000624825	0.025742
224815_at	COMMD7	-0.342769	0.000690823	0.0272301
224818_at	SORT1	0.302209	0.00123694	0.0385498
224840_at	FKBP5	2.09888	1.9676e-07	0.000249625
224856_at	FKBP5	1.70736	1.10909e-07	0.000149501
224857_s_at	POLR1D	-0.377605	0.000842638	0.0304161
224881_at	VKORC1L1	-0.283867	0.000412207	0.0199781
224884_at	AKAP13	0.414331	0.000385525	0.0192242
224891_at	FOXO3	0.302201	0.00107285	0.0355708
224896_s_at	TTL	-0.666975	1.84844e-08	4.44645e-05
224904_at	PDPR	0.627988	0.000824178	0.0300769
224908_s_at	TTL	-0.749724	2.25124e-07	0.000257513
224913_s_at	TIMM50	-0.478939	2.68797e-05	0.00482469
224953_at	YIPF5	-0.567701	0.000818274	0.0299121
224959_at	SLC26A2	1.30628	0.00067969	0.0269967
224964_s_at	GNG2	-0.435952	0.000135345	0.0110792
224999_at	EGFR	0.775163	0.0017146	0.0466761
225000_at	PRKAR2A	0.307662	0.000568684	0.0241915
225007_at	G3BP1	0.409736	0.000200428	0.0140805
225017_at	CCDC14	0.493385	0.000174295	0.012816
225019_at	CAMK2D	0.32063	0.00131977	0.0398936
225031_at	CHD6	0.401899	0.00018659	0.0134705
225045_at	CCDC88A	0.548937	0.00118967	0.037622
225048_at	PHF10	0.335775	0.00170706	0.0465616
225052_at	TMEM203	-0.402494	7.29601e-05	0.00799675
225064_at	RABEP1	-0.510926	1.2833e-05	0.00306018
225071_at	NUS1	-0.366976	4.9338e-05	0.0063846
225099_at	FBXO45	-0.418687	0.00122331	0.038293
225103_at	MRPL38	-0.330847	0.000621481	0.0256631
225157_at	MLXIP	0.431705	0.000572952	0.0243263
225165_at	PPP1R1B	0.86264	0.000111362	0.0100284
225186_at	RAPH1	-0.583275	0.000743328	0.0282917
225202_at	RHOBTB3	1.10756	7.60111e-05	0.00817705
225216_at	FAM199X	0.280855	0.0015881	0.0446562
225221_at	ZKSCAN1	0.385599	0.000295678	0.0170435
225222_at	MFSD14A	-0.365053	5.89781e-05	0.0071865
225235_at	TSPAN17	-0.300507	0.000314917	0.01742
225249_at	SPPL2B	0.428429	2.26444e-05	0.00431657
225259_at	RAB6B	-0.530945	0.000286881	0.0167905
225270_at	NEO1	0.467302	0.000253282	0.0156993
225304_s_at	NDUFA11	-0.313334	0.00154032	0.0438272
225327_at	FAM214A	0.550085	2.78761e-05	0.00482907
225338_at	ZYG11B	-0.380052	0.000235989	0.0152386
225348_at	SRSF10	-0.622867	0.000565188	0.0241129
225375_at	TMEM199	-0.386533	0.000434932	0.0206925
225391_at	LOC93622	-0.362596	0.000304415	0.0170992
225405_at	HNRNPUL2	0.313549	1.72737e-05	0.00378224
225419_at	MPLKIP	-0.423319	1.95925e-05	0.00408842
225427_s_at	NAXE	-0.342431	0.00179106	0.0480456
225438_at	NUDCD1	-0.43408	0.00134533	0.0404396
225444_at	UBN2	0.662592	0.000435101	0.0206925
225454_at	CCDC124	-0.3809	0.0015492	0.0439827
225455_at	TADA1	-0.475906	0.000150461	0.0116388
225507_at	PNISR	0.652786	0.00116115	0.037156
225516_at	SLC7A2	0.872537	0.0018649	0.0493598
225522_at	AAK1	0.505604	8.23917e-05	0.00856378
225526_at	MKLN1	0.367455	0.000897749	0.0317738
225532_at	CABLES1	0.476447	0.00135108	0.0405458
225545_at	EEF2K	0.423288	0.000748711	0.0284293
225546_at	EEF2K	0.537741	5.54449e-05	0.00691219
225547_at	SNHG6	0.390725	0.000914943	0.0321385
225561_at	SELENOT	-0.316961	0.000653417	0.0263906
225638_at	COA6	-0.480869	2.38391e-06	0.00122416
225643_at	MAPK1IP1L	-0.354472	0.000188882	0.0135837
225657_at	NCBP2AS2	-0.383674	0.00079512	0.0294399
225666_at	TMTC4	0.746697	5.52134e-05	0.00690927
225726_s_at	PLEKHH1	1.07812	0.000442897	0.0208335
225737_s_at	FBXO22	-0.376532	0.000626309	0.0257785
225739_at	RAB11FIP4	-0.550322	1.02776e-06	0.000682039
225743_at	RPUSD3	-0.409522	0.000420163	0.0202049
225783_at	UBE2F	-0.397753	2.69616e-05	0.00482469
225786_at	HNRNPU	0.978079	0.000132528	0.0110172
225787_at	UBE2F	-0.39006	4.69505e-05	0.00623142
225798_at	JAZF1	-0.505893	4.13303e-05	0.00582609
225800_at	JAZF1	-0.686538	0.000122588	0.010661
225814_at	XRN1	0.74687	0.000916262	0.0321586
225921_at	NIN	0.458717	0.000726813	0.0279421
225923_at	VAPB	0.397229	0.000132284	0.0110172
225948_at	COA8	-0.429066	1.89651e-05	0.0040498
225956_at	CREBRF	0.434311	0.00108449	0.0356823
225959_s_at	ZNRF1	-0.484769	9.46566e-06	0.00261732
225962_at	ZNRF1	-0.484981	0.000831135	0.0301522
225992_at	MLLT10	0.478653	7.73161e-05	0.00819418
226062_x_at	MINDY1	0.592605	0.000304878	0.0170992
226114_at	ZNF436	-0.392905	0.000140633	0.0112447
226160_at	H6PD	0.352878	0.000743481	0.0282917
226166_x_at	STK36	0.381131	0.000356723	0.0184591
226181_at	TUBE1	0.845179	0.000388639	0.0193106
226198_at	TOM1L2	0.365943	0.000112333	0.0100738
226235_at	LINC00667	-0.334492	0.00108921	0.0357559
226250_at	ZBTB20	0.545124	0.00167334	0.0458864
226276_at	TMEM167A	-0.404139	0.00109192	0.035763
226285_at	CAPRIN1	-0.297701	0.00100257	0.0339983
226287_at	CCDC34	-0.518025	0.000231589	0.0151281
226289_at	CAPRIN1	-0.548179	0.00105759	0.0352738
226301_at	SLC18B1	0.828188	0.00131642	0.0398203
226312_at	RICTOR	0.550476	0.000659652	0.0264898
226315_at	ZNF830	-0.295414	0.000458722	0.0212735
226319_s_at	ALYREF	-0.755111	0.000929824	0.0324818
226325_at	ADSS1	0.569559	5.03267e-06	0.00185576
226334_s_at	AHSA2P	0.878934	1.36863e-05	0.00320848
226344_at	ZMAT1	0.557896	0.000790119	0.0293914
226358_at	APH1B	0.344846	7.45105e-05	0.00809574
226374_at	CXADR	-0.501036	0.000114655	0.0101972
226390_at	STARD4	-0.634462	2.87527e-05	0.00488287
226412_at	PNISR	0.646926	0.000523273	0.0230772
226419_s_at	SRSF1	0.763437	0.0011645	0.0372135
226425_at	CLIP4	0.43601	1.80471e-05	0.00391186
226436_at	RASSF4	0.788726	7.68417e-05	0.00817705
226437_at	YIF1B	-0.579807	6.38147e-05	0.00756222
226465_s_at	SON	0.47201	0.000272332	0.0161858
226506_at	THSD4	0.309496	0.00061355	0.0254872
226512_at	ZMYM2	0.408207	8.69276e-05	0.00880662
226527_at	RPRD2	0.359537	2.0425e-05	0.00419539
226580_at	BRMS1L	-0.423309	5.99983e-05	0.00729022
226591_at	PWAR6	0.631945	0.000897932	0.0317738
226638_at	ARHGAP23	0.358557	0.000987485	0.0336721
226651_at	HOMER1	-0.710399	2.61151e-06	0.00132526
226677_at	ZNF521	-0.54761	0.00136268	0.0407059
226686_at	CISD2	-0.489357	0.00168956	0.0461844
226687_at	PRPF40A	0.308083	0.00128538	0.0392946
226705_at	FGFR1	0.349199	0.000175998	0.012911
226766_at	ROBO2	-0.528085	6.03673e-05	0.00729396
226767_s_at	FAHD1	-0.626104	0.000120455	0.0105392
226778_at	TDRP	0.332777	0.00023404	0.0151809
226823_at	PHACTR4	0.406342	0.000608979	0.02538
226848_at	MRPS25	0.567383	0.000360331	0.0185698
226867_at	DENND4C	0.680115	1.84413e-06	0.00101983
226883_at	KLHL11	0.34643	9.85707e-05	0.00953329
226884_at	LRRN1	-0.751221	0.000550575	0.0237016
226889_at	WDR35	0.432202	0.000110532	0.0100164
226893_at	ABL2	0.396549	0.00162012	0.0449703
226907_at	PPP1R14C	-0.510853	0.000671404	0.0268189
226912_at	ZDHHC23	-0.63049	0.000219	0.0145556
226962_at	ZBTB41	0.47974	0.00113705	0.0366946
226963_at	BTF3L4	-0.437277	0.000538698	0.0234365
226964_at	TTBK2	0.500339	4.7149e-05	0.00623856
226969_at	MTR	0.526624	0.000102017	0.00968239
226981_at	KMT2A	0.651001	7.87241e-06	0.00233226
227014_at	ASPHD2	-0.59832	2.87868e-07	0.000288772
227015_at	ASPHD2	-0.720547	4.53281e-09	2.17247e-05
227026_at	MPHOSPH8	0.307821	0.000692511	0.0272301
227041_at	SESTD1	0.270068	0.00159275	0.0447448
227052_at	SMIM14	0.342003	0.000593298	0.0248707
227095_at	LEPROT	0.776526	0.00132299	0.0399631
227108_at	STARD9	0.447785	4.66882e-05	0.00621572
227122_at	ZNF791	0.430486	0.000139428	0.0111922
227129_x_at	LINC01000	0.729444	9.493e-05	0.00937027
227135_at	NAAA	0.422961	0.000640507	0.0261726
227154_at	IGSF21	-0.442821	8.09398e-05	0.00843319
227156_at	CASK	-0.403728	7.09753e-05	0.00791091
227176_at	SLC2A13	-0.446728	2.78063e-05	0.00482907
227208_at	CENATAC	0.864635	4.70533e-06	0.00182255
227334_at	USP54	0.483258	0.00164457	0.0453862
227408_s_at	SNX25	-0.494696	2.25465e-05	0.00431657
227420_at	TNFAIP8L1	-0.374362	6.70995e-05	0.00773887
227465_at	MAU2	0.377047	1.11377e-05	0.00282077
227517_s_at	GAS5	0.857502	0.00139584	0.0412675
227528_s_at	KMT2D	0.498426	0.000982732	0.0335975
227530_at	AKAP12	0.369739	0.000219714	0.0145805
227630_at	PPP2R5E	-0.513683	0.000265303	0.0160503
227657_at	RNF150	-0.496649	1.78981e-06	0.00100366
227658_s_at	PLEKHA3	-0.533664	2.39209e-05	0.0045058
227669_at	MPC2	-0.376106	0.00169163	0.0462119
227678_at	ATP23	-0.461694	0.000545863	0.0236167
227690_at	GABRB3	-0.344559	0.000132979	0.0110308
227698_s_at	RAB40C	-0.397095	0.00103363	0.0346968
227775_at	CELF6	-0.535932	2.2311e-05	0.00430223
227821_at	LGI4	0.410231	0.000494474	0.0223342
227824_at	PRKCB	-1.16076	0.000138947	0.0111922
227830_at	GABRB3	-0.701167	2.91734e-05	0.00489609
227865_at	IDNK	0.354339	0.000808398	0.0297274
227880_s_at	TMEM185A	-0.468643	0.000362679	0.0186368
227933_at	LINGO1	-0.415012	0.00174645	0.047243
227955_s_at	EFNA5	0.444297	0.000137402	0.0111629
227960_s_at	FAHD1	-0.557012	0.000250059	0.015608
227979_at	RBM4	0.530363	0.00113974	0.0366946
228041_at	AASDH	0.357926	0.000834133	0.0301861
228077_at	MRI1	0.396785	0.00131007	0.0396788
228109_at	RASGRF2	-0.797842	0.000802084	0.0296215
228123_s_at	ABHD12	-0.34884	0.000508467	0.0225878
228131_at	ERCC1	0.49512	5.63628e-06	0.00194497
228135_at	C1orf52	-0.391452	1.7454e-05	0.00380242
228162_at	ESD	-0.380374	0.000337545	0.017931
228220_at	FCHO2	0.755609	0.00107895	0.0355815
228238_at	GAS5	0.677111	1.67279e-05	0.00370031
228272_at	DNLZ	-0.628392	8.69739e-05	0.00880662
228368_at	ARHGAP20	-0.718944	9.9098e-05	0.00956285
228461_at	SH3RF3	-0.375818	0.000382742	0.0191305
228501_at	GALNT15	0.799085	0.00113942	0.0366946
228561_at	CDC37L1	-0.463478	0.000982962	0.0335975
228567_at	GAN	0.398815	0.000229351	0.0151185
228590_at	PTCD3	0.653853	1.16045e-05	0.00287677
228598_at	DPP10	-0.469508	0.000138397	0.0111922
228640_at	PCDH7	-0.347919	0.000348033	0.0181913
228695_at	VXN	-1.30286	2.32436e-08	5.01307e-05
228701_at	VXN	-1.02418	4.47018e-06	0.00178538
228733_at	PUSL1	-0.404742	0.000556615	0.0238901
228768_at	FNIP1	0.412185	0.000325339	0.0176967
228795_at	PRKCB	-0.813827	0.000678708	0.0269967
228851_s_at	ENSA	-1.07024	9.55952e-06	0.00262643
228903_at	CES4A	0.352392	0.000103332	0.00971076
228987_at	CYRIB	-0.644927	0.000365106	0.0186368
229029_at	CAMK4	-0.739075	3.21814e-05	0.00508478
229036_at	TNRC6B	0.438772	0.000723369	0.0279277
229080_at	COL26A1	-0.503311	1.42147e-05	0.00329651
229151_at	SLC14A1	1.68251	0.000348296	0.0181913
229159_at	THSD7A	-0.774934	0.000209004	0.0143557
229192_s_at	TBCD	-0.379369	0.000720244	0.0279072
229246_at	SRSF1	0.422028	0.000477474	0.0219265
229254_at	MFSD4A	-0.780202	9.14487e-08	0.000139266
229256_at	PGM2L1	-0.362713	0.000613374	0.0254872
229269_x_at	SSBP4	-0.429734	0.000211787	0.0144202
229300_at	RAB3C	-0.481303	0.000563114	0.0241123
229344_x_at	RIMKLB	0.412422	0.000415349	0.0200179
229430_at	VXN	-0.453365	2.55323e-07	0.00028219
229461_x_at	NEGR1	-0.617355	0.00110051	0.0359624
229488_at	OTUD7B	0.36405	6.93374e-05	0.0078295
229497_at	ANKDD1A	0.469083	0.00154081	0.0438272
229586_at	CHD9	0.775485	0.000677737	0.0269937
229666_s_at	CSTF3	-0.42023	0.000180687	0.0131211
229679_at	C12orf76	-0.404891	0.00049715	0.0224081
229799_s_at	NCAM1	0.597814	0.000692357	0.0272301
229815_at	TMEM161B-DT	-0.531318	0.000488679	0.0221798
229818_at	SVOP	-0.588391	0.000269914	0.0161326
229846_s_at	MAPKAP1	-0.418266	0.000671484	0.0268189
229849_at	WIPF3	0.535426	0.000134747	0.011071
229961_x_at	YJEFN3	-0.511589	0.000213485	0.0144337
229978_at	SHISA9	-0.803543	1.73812e-09	1.25125e-05
230078_at	RAPGEF6	0.717406	4.80136e-05	0.00627596
230112_at	MARCHF4	-0.375203	0.00157278	0.0443702
230117_at	VSTM2A	-0.747969	0.000444415	0.0208822
230158_at	DPY19L2	0.740994	0.000288064	0.0167914
230217_at	CLVS1	-0.524977	9.60955e-05	0.00942064
230230_at	PTPN4	-0.563088	0.00125929	0.0388828
230235_at	MCTS1	0.334971	0.000810593	0.0297321
230263_s_at	DOCK5	1.10347	0.001062	0.0353544
230306_at	VPS26B	-0.47254	3.78454e-06	0.00155472
230418_s_at	GALNT16	0.51948	0.00158772	0.0446562
230508_at	DKK3	0.492156	0.000209623	0.0143739
230577_at	LINC00844	1.34004	0.000177295	0.0129321
230695_s_at	RSPH9	-0.334655	0.000545277	0.023615
230698_at	CALN1	-0.510506	0.00064244	0.0261726
230700_at	RTN4RL1	-0.446542	0.00106716	0.035463
230755_at	RHBDL3	0.585426	4.77086e-07	0.000403512
230765_at	NWD2	-1.08987	6.52093e-09	2.78222e-05
230773_at	ZNF385D	-0.452718	0.00126153	0.0388964
230846_at	AKAP5	-0.561635	0.000177239	0.0129321
230883_at	NXPH2	-0.680832	0.000192481	0.0136868
230896_at	BEND4	-0.443054	0.000410531	0.019935
230923_at	TAFA1	-0.842116	3.78375e-06	0.00155472
230941_at	C2orf92	0.275616	0.00107783	0.0355808
230972_at	ANKRD9	-0.454774	0.00136651	0.0407638
231015_at	KLF15	0.582458	0.000817483	0.0299085
231186_at	LINC00643	-0.559411	7.77656e-06	0.00233226
231299_at	AGAP3	-0.506669	0.000761023	0.0287954
231380_at	C8orf34	-0.478759	0.000506854	0.0225859
231397_at	PLPPR5	-0.529581	0.000340575	0.0180032
231411_at	LHFPL6	0.393665	0.000287928	0.0167914
231740_at	KCNJ11	-0.439182	0.000456772	0.0212087
231770_x_at	WDPCP	0.522813	0.000402611	0.0198023
231806_s_at	STK36	0.400451	0.000165897	0.0123592
231825_x_at	ATF7IP	0.554399	0.00168355	0.0460494
231856_at	ARFGEF3	-0.553533	0.000648949	0.026284
231870_s_at	NMD3	0.348356	0.000834169	0.0301861
231917_at	GFM2	-0.390291	0.000511809	0.0226895
231918_s_at	GFM2	-0.768172	1.08557e-05	0.00277078
231935_at	ARPP21	-0.693988	8.31973e-06	0.00242481
231980_at	DOK6	-0.697543	4.74564e-06	0.00182255
231992_x_at	RABGEF1P1	0.467842	0.000474553	0.0218229
232010_at	FSTL5	-0.496121	0.00050261	0.022521
232027_at	SYNE1	-0.73777	8.11719e-06	0.00238187
232034_at	LINC00537	1.1698	0.000116562	0.0103242
232053_x_at	RHBDD2	-0.647877	2.20799e-05	0.00429016
232054_at	PCDH20	-0.610327	0.000151862	0.0116766
232098_at	DST	0.921167	0.00132519	0.0399702
232166_at	CEP126	-0.70237	0.000102036	0.00968239
232169_x_at	NDUFS8	0.595156	0.00014376	0.0113573
232215_x_at	PRR11	0.561093	0.00187579	0.0495516
232266_x_at	CDK13	0.781239	0.00115723	0.0370856
232275_s_at	HS6ST3	-1.26323	3.38163e-06	0.00151451
232377_at	NXPH1	-0.855847	5.9495e-06	0.00195902
232390_at	NCAM2	-0.506385	0.000192046	0.0136868
232399_at	DCLK3	-0.299853	0.000986244	0.0336721
232420_x_at	MAN1B1-DT	0.384945	0.000778967	0.0291673
232469_x_at	SSBP3-AS1	0.337537	0.00130575	0.0396788
232683_s_at	PARP6	-0.315813	0.000303616	0.0170992
232806_s_at	FAM131A	-0.788868	0.00019037	0.013618
232814_x_at	COA8	0.559849	0.000675771	0.0269466
232859_s_at	MAGI1	-0.427105	0.000257599	0.0158284
232884_s_at	ZNF853	0.365046	0.000636616	0.0260535
233002_at	PPP4R4	-0.837563	0.000355402	0.0184479
233135_at	LINC01007	-0.670466	0.000648614	0.026284
233150_at	GALNTL5	-0.767148	3.94874e-05	0.00565876
233164_x_at	RHBDD1	0.424128	0.000258951	0.0158438
233193_x_at	INTS4	0.349727	0.000914329	0.0321385
233234_at	KCTD16	-0.644089	0.0012505	0.0387618
233333_x_at	AVIL	0.330076	0.00117586	0.037377
233775_x_at	LOC100289333	0.586668	0.000679611	0.0269967
233846_at	CCDC85A	-0.402238	0.000139491	0.0111922
233868_x_at	ADAM33	0.500845	0.000460953	0.0213339
233881_s_at	TOLLIP	-0.549312	0.000243637	0.0154095
233912_x_at	ELMOD2	0.405939	0.00144672	0.0421217
233924_s_at	EXOC6	-0.554689	0.000271773	0.0161858
234005_x_at	STK36	0.346089	0.000367019	0.0186657
234024_at	CBLN4	-1.14133	3.15498e-05	0.00506706
234710_s_at	PARP6	-0.503492	7.4381e-06	0.00227051
234734_s_at	TNRC6A	0.560158	6.7971e-06	0.00213205
234762_x_at	NLN	0.766202	0.000410855	0.019935
234915_s_at	DENR	-0.543843	0.00048252	0.0220482
234994_at	TMEM200A	-0.868331	0.000105243	0.00976268
235006_at	CDKN2AIPNL	-0.824482	7.47451e-06	0.00227051
235023_at	VPS13C	1.21748	0.000931972	0.0324818
235085_at	PRAG1	-0.496826	0.000651259	0.0263281
235295_at	PANX1	-0.649835	0.000125555	0.0107287
235320_at	ARL6	-0.448797	0.000304755	0.0170992
235327_x_at	UBXN2A	0.641162	0.000155414	0.0118025
235449_at	LRSAM1	-0.449732	0.000881262	0.0314679
235502_at	PPP2CA	-0.622127	0.00127986	0.0392651
235573_at	HSPH1	-0.45897	0.000118102	0.0103826
235591_at	SSTR1	-1.07643	1.53916e-08	4.4261e-05
235683_at	SESN3	-0.583052	0.000330795	0.0178154
235684_s_at	SESN3	-0.356395	0.000114543	0.0101972
235792_x_at	PIK3C2A	0.410198	0.00133767	0.0402374
235935_at	LRRC73	-0.627633	0.000877996	0.0314033
236038_at	RNF150	-0.529676	0.000566813	0.0241357
236088_at	NTNG1	-0.491003	0.00100746	0.0340305
236290_at	DOK6	-0.727821	1.29781e-06	0.000802175
236302_at	PPM1E	-0.448059	0.000177484	0.0129321
236308_at	VSTM2A	-0.799811	0.00032135	0.0175907
236361_at	GALNT15	0.721789	0.00040788	0.0199026
236377_at	TMEM132D	-0.605805	1.50508e-06	0.000889335
236453_at	LOC105372733	-0.660235	0.000305225	0.0170992
236705_at	TMEM196	-0.76574	9.74221e-05	0.00948172
236715_x_at	UACA	0.380044	0.00135348	0.0405458
236734_at	SLITRK1	-0.436146	1.62561e-05	0.00361447
236902_at	LINC00643	-0.708867	3.58547e-07	0.000336216
236935_at	PTPN4	-0.445497	0.000925976	0.0324468
237386_at	SMIM10L1	-0.269527	0.00146665	0.0424692
237475_x_at	CCDC152	0.791348	0.000104742	0.00973999
237939_at	EPHA5	-0.721177	3.9457e-05	0.00565876
238029_s_at	SLC16A14	-0.52559	1.38475e-05	0.00322872
238077_at	KCTD6	-0.360252	4.5509e-05	0.00610272
238143_at	LYPD8	-0.694903	0.000372254	0.0188244
238166_s_at	LINC02693	-0.426411	0.00011107	0.010023
238360_s_at	LINC00672	-0.419428	0.00161824	0.0449701
238417_at	PGM2L1	-0.715679	0.000608236	0.0253736
238461_at	EIF4E3	-0.57043	0.00121184	0.0379923
238480_at	TTC39C	0.597991	0.00015933	0.0119943
238514_at	TMEM25	-0.423581	0.000724987	0.0279277
238601_at	PHKB	-0.676051	1.81614e-05	0.00391697
238681_at	GDPD1	-0.63296	0.000300329	0.0170992
238692_at	BTBD11	-0.725136	0.000344029	0.0180972
238701_x_at	COLCA1	0.741048	0.000124633	0.0107093
238815_at	LRRTM1	-0.826447	1.15223e-09	1.24253e-05
238823_at	FMNL3	0.303941	0.000732331	0.0280592
238862_at	MFSD4A	-1.18394	5.2935e-06	0.00187538
238885_at	KIAA1549	-0.381058	0.00183571	0.048729
238890_at	BRWD1	0.643383	0.000246629	0.0155105
239038_at	C1orf52	-0.667445	5.73694e-06	0.00194853
239355_at	GMCL1	0.583709	9.36297e-08	0.000139266
239407_at	PAXBP1-AS1	0.331135	0.000287657	0.0167914
239748_x_at	OCIAD1	0.628023	0.000318622	0.0175303
239888_at	UBQLN2	-0.432548	0.000439417	0.0207604
239913_at	SLC10A4	-0.56556	0.000710326	0.0276533
240106_at	GNPTAB	-0.410288	7.87189e-05	0.00826166
240261_at	TOM1L1	-0.367152	0.000241444	0.0153836
240532_at	SLC32A1	-0.807388	7.77822e-05	0.00820841
241342_at	TMEM65	-0.551335	3.72767e-06	0.00155472
241370_at	TMEM65	-0.512095	0.000368684	0.0186657
241382_at	PCP4L1	-0.925054	2.27161e-05	0.00431657
241672_at	SERTM1	-1.32339	3.74879e-07	0.000336883
241727_x_at	DHFR2	0.339369	0.000508175	0.0225878
241729_at	DOK6	-1.01021	8.16059e-07	0.000598637
241834_at	IPW	0.625441	0.000733701	0.0280592
242008_at	AGTPBP1	1.49609	0.000231344	0.0151281
242077_x_at	CGAS	0.382653	0.000455523	0.0211735
242093_at	SYTL5	-0.578602	0.000696296	0.027354
242098_at	ARFGEF3	-0.671699	0.00130536	0.0396788
242280_x_at	CPEB4	0.41333	0.000249538	0.015608
242286_at	GRIN2A	-0.806785	1.62258e-05	0.00361447
242372_s_at	MFSD4A	-1.02051	1.60831e-06	0.000937495
242474_s_at	VMA21	-0.263721	0.00116596	0.0372135
242578_x_at	SLC22A3	0.617721	0.000275549	0.0163491
242608_x_at	FAM161B	0.531465	0.000189445	0.0135969
242825_at	PLPPR5	-0.440534	0.000691983	0.0272301
242889_x_at	FUT8-AS1	0.382358	0.00061759	0.0255713
242989_at	STRN	0.534168	0.000336874	0.0179194
242999_at	ARHGEF7	-0.512642	0.000286262	0.016777
243337_at	FREM3	-1.20151	0.000895393	0.0317622
243511_at	HEXA	0.351972	0.0010054	0.0340305
243556_at	NGEF	-1.23621	4.47726e-05	0.00605413
243753_at	ERICH3	-0.734202	0.00131082	0.0396788
243779_at	GALNT13	-0.445979	0.00107458	0.0355732
244170_at	RAB3C	-1.50072	0.000624151	0.0257388
244495_x_at	TMEM241	0.429077	9.15576e-05	0.00912087
244584_at	KIAA1549L	-0.693762	0.00153116	0.0436817
244675_at	RGS8	-0.645841	3.47707e-06	0.00151451
244699_at	AHI1	1.15886	9.00263e-05	0.00898908
320_at	PEX6	-0.596646	0.000812465	0.0297754
32099_at	SAFB2	0.398099	0.000788573	0.0293914
32259_at	EZH1	0.359532	3.64012e-06	0.00155462
34726_at	CACNB3	-0.541647	1.06038e-06	0.000693021
35626_at	SGSH	0.388653	5.58422e-05	0.00694165
38340_at	HIP1R	0.524042	3.52736e-05	0.0054535
45828_at	DMAC2	-0.264729	0.00180231	0.0481849
47608_at	TJAP1	0.328563	0.00179521	0.0481269
49306_at	RASSF4	0.601928	3.01084e-05	0.00494224
57588_at	SLC24A3	-0.618954	7.79593e-05	0.00820841
64432_at	MAPKAPK5-AS1	-0.479299	0.000263429	0.0160037
823_at	CX3CL1	-0.633198	1.79162e-06	0.00100366
91703_at	EHBP1L1	-0.552452	6.30841e-06	0.00201565
Male Age 21-39 (ref.) vs. 65-84 group
Probe set	Symbol	logFC	P.Value	FDR adj.P.Val
1431_at	CYP2E1	-0.297314	0.0020169	0.0288268
1438_at	EPHB3	-0.295969	0.00128771	0.0221389
1552264_a_at	MAPK1	-0.728984	4.17833e-06	0.000745448
1552277_a_at	MSANTD3	-0.3168	8.39677e-05	0.0042337
1552291_at	PIGX	-0.441429	0.00148711	0.0242245
1552293_at	TMEM196	-0.279813	0.000220265	0.00753459
1552344_s_at	CNOT7	-0.565967	0.000392022	0.0107223
1552395_at	TSSK3	-0.335012	0.00428157	0.0436031
1552409_a_at	ODF4	-0.28043	0.00135411	0.0227402
1552410_at	CLEC4F	-0.289915	0.00153726	0.0247332
1552426_a_at	TM2D3	-0.469991	5.32577e-06	0.000854499
1552455_at	PRUNE2	0.607279	0.00418969	0.0431215
1552481_s_at	MAN1A2	-0.29017	0.00534868	0.0499606
1552484_at	SMCR8	-0.355332	0.00255411	0.0328246
1552485_at	LACTB	-0.337009	0.00166414	0.0258303
1552510_at	SLC34A3	-0.312917	0.00521841	0.0492983
1552520_at	TMEM74	-0.331187	0.000260743	0.00834333
1552521_a_at	TMEM74	-0.345028	0.00415839	0.0429326
1552541_at	TAGAP	-0.316482	0.00256581	0.0328756
1552575_a_at	C6orf141	-0.284093	0.000208695	0.00730092
1552618_at	STX6	-0.357186	9.69333e-05	0.00463036
1552625_a_at	TRNT1	-0.307818	0.00232245	0.0311349
1552658_a_at	NAV3	-0.585837	0.000297758	0.00904491
1552660_a_at	C5orf22	-0.536634	0.000786731	0.016349
1552663_a_at	ERC1	-0.347923	0.00396845	0.0418401
1552666_a_at	LRRC7	-0.624091	0.00394642	0.0416717
1552689_at	CASKIN1	0.356595	0.000392252	0.0107223
1552715_a_at	RXFP1	-0.774219	0.00474616	0.046518
1552722_at	ARPP21	-1.69544	1.27514e-08	3.85422e-05
1552752_a_at	CADM2	-0.552954	0.000101167	0.00473816
1552754_a_at	CADM2	-0.351173	0.00325516	0.0372542
1552758_at	HDAC9	-0.308405	1.9848e-05	0.00182817
1552760_at	HDAC9	-0.674452	6.87478e-05	0.00381161
1552766_at	HS6ST2	-0.551772	5.59753e-05	0.00343945
1552774_a_at	SLC25A27	-0.66052	5.39806e-06	0.000856048
1552878_at	ATOH7	-0.294349	0.00305612	0.0360574
1552879_a_at	ATOH7	-0.269808	0.00297615	0.0355805
1552897_a_at	KCNG3	-0.315937	0.00215998	0.029955
1552924_a_at	PITPNM2	-0.394419	0.000142994	0.00583243
1552925_at	PCDH10	-0.38994	0.000209233	0.00730199
1552978_a_at	SCAMP1	-0.630244	0.0030985	0.0363782
1553037_a_at	SYN2	-0.441799	0.00514917	0.0487938
1553136_at	KCTD18	-0.300029	0.00169248	0.026064
1553168_at	GRIK5	-0.348489	0.000966176	0.0185971
1553178_a_at	SSTR3	-0.299607	2.62695e-05	0.00214609
1553181_at	DDX31	-0.335256	0.00127279	0.022036
1553194_at	NEGR1	-0.916521	5.32825e-05	0.00333399
1553202_at	STOX1	0.371977	0.00257653	0.0329918
1553205_at	MIR1-1HG-AS1	-0.306471	0.00504287	0.0481036
1553218_a_at	ZNF512	-0.28119	0.00110021	0.0201347
1553263_at	USH1G	-0.313056	0.00349131	0.0386644
1553268_at	RHBDL3	0.392087	0.000119154	0.0052286
1553359_at	FBXL18	-0.439115	0.00375782	0.0404269
1553410_a_at	ABCC12	-0.408367	0.0032456	0.0372239
1553420_at	SATB2-AS1	-0.535791	2.12055e-05	0.00188598
1553428_at	LY86-AS1	-0.424634	0.000534006	0.012916
1553507_a_at	GPR6	-0.429699	2.49104e-05	0.00208502
1553510_s_at	CNOT9	-0.52682	5.02145e-07	0.0002166
1553533_at	JPH1	-0.351784	0.00021978	0.00752397
1553555_at	TAS2R38	-0.292477	0.0042434	0.0434256
1553602_at	MUCL1	-0.460064	5.89407e-05	0.00353603
1553603_s_at	ATL2	-0.499507	0.00294236	0.0354323
1553697_at	CCSAP	-0.659731	5.80114e-05	0.00351944
1553698_a_at	CCSAP	-0.896323	6.33242e-06	0.000922801
1553704_x_at	ZNF791	0.321511	0.0017555	0.0265143
1553713_a_at	RHEBL1	-0.449184	0.00020555	0.00725687
1553864_at	GPR26	-0.820659	0.000167015	0.00639276
1553865_a_at	GPR26	-0.73807	7.80558e-06	0.00105217
1553928_at	ELMOD2	-0.285791	0.00108951	0.0200153
1553959_a_at	B3GALT6	-0.278233	0.00020137	0.00717267
1553973_a_at	SPINK6	-0.295333	0.000918515	0.0180502
1553976_a_at	DPCD	-0.288789	0.000844586	0.0172008
1553987_at	MAPKAPK5-AS1	-0.471588	2.49883e-06	0.000549933
1554027_a_at	SLC4A4	0.434484	0.00142079	0.0234543
1554057_at	ASH1L-AS1	-0.274973	0.00271738	0.0339555
1554065_at	MVB12B	-0.280496	0.000208186	0.00729348
1554080_at	CNOT9	-0.577147	8.0646e-07	0.000283264
1554093_a_at	SNAPC5	-0.500881	3.29212e-06	0.000651401
1554099_a_at	SPIN3	-0.335054	0.000136579	0.00568112
1554105_at	TMEM185A	-0.294281	0.000536719	0.0129458
1554112_a_at	ULK2	-0.387586	5.81915e-05	0.00351991
1554133_at	RUFY2	-0.387506	0.00161594	0.0254089
1554145_a_at	PPP1R21	-0.572746	2.15167e-05	0.00190189
1554151_at	OGDH	-0.284922	0.00208749	0.0293877
1554161_at	SLC25A27	-0.716733	9.84142e-06	0.00119918
1554170_a_at	MBLAC1	-0.390767	0.000127566	0.00544112
1554208_at	MEI1	-0.375571	0.00176644	0.0266231
1554225_a_at	LINC02712	-0.288729	0.0040484	0.0423033
1554248_at	ZNF638	-0.290499	0.000194982	0.00703846
1554256_a_at	PCNX2	-0.362895	0.000891997	0.0177966
1554287_at	TRIM4	0.308318	0.00110462	0.0201916
1554292_a_at	UHRF1BP1L	-0.392453	9.00528e-06	0.00114585
1554333_at	DNAJA4	-0.921319	0.000432511	0.0113551
1554346_at	GNB5	-0.279529	0.00153509	0.0247167
1554351_a_at	TIPRL	-0.361605	0.0027765	0.0343674
1554365_a_at	PPP2R5C	-0.504445	3.37465e-06	0.000657072
1554390_s_at	ACTR2	-0.538396	0.00252589	0.0326308
1554393_a_at	AZIN2	-0.378173	3.89774e-05	0.00272937
1554396_at	UEVLD	-0.325858	0.000114867	0.00512628
1554417_s_at	APH1A	-0.298102	0.00292724	0.0353193
1554433_a_at	ZNF146	-0.333993	0.00154025	0.0247382
1554443_s_at	BEST1	0.280737	0.00200365	0.0287135
1554462_a_at	DNAJB9	-0.711618	2.70397e-07	0.000161994
1554471_a_at	ANKRD13C	-0.316035	0.00304629	0.0360005
1554476_x_at	ZNF808	0.762218	0.00161918	0.0254158
1554500_a_at	RGS7	-0.950559	1.1207e-05	0.0012995
1554501_at	TSC22D4	0.284011	0.00182027	0.0271104
1554509_a_at	MINDY3	-0.537643	4.90162e-06	0.000810083
1554510_s_at	GHITM	-0.536791	4.91098e-07	0.0002166
1554524_a_at	OLFM3	-0.626434	2.81548e-05	0.00224484
1554526_at	OLFM3	-0.612722	6.60134e-05	0.0037395
1554530_at	VSTM2A	-0.518274	0.000368793	0.0103365
1554534_at	DPYD	-0.281327	0.00234329	0.0312914
1554539_a_at	RHOF	-0.345704	0.000808511	0.0166787
1554553_s_at	YIF1B	-0.331274	0.000651065	0.014562
1554569_a_at	CELF2	-0.448397	0.00145921	0.0238782
1554577_a_at	PSMD10	-0.287471	0.00112187	0.020367
1554591_at	PCAT4	-0.309936	0.00248228	0.0323289
1554592_a_at	SLC1A6	-0.836695	4.37181e-06	0.000760394
1554593_s_at	SLC1A6	-0.863333	7.80162e-06	0.00105217
1554600_s_at	LMNA	0.328903	0.000386055	0.0105865
1554607_at	CNKSR2	-0.623105	0.00116664	0.0208463
1554633_a_at	MYT1L	-1.24751	5.5841e-05	0.00343945
1554660_a_at	CNST	-0.407732	0.00489171	0.0472256
1554661_s_at	CNST	-0.707505	8.47735e-08	9.6229e-05
1554678_s_at	HNRNPDL	-0.547131	8.12432e-05	0.00415709
1554679_a_at	LAPTM4B	-0.628861	0.000125184	0.00538905
1554680_s_at	KCNS2	-0.27012	0.00449215	0.0449163
1554689_a_at	NLGN4X	-0.424099	7.33473e-05	0.00394493
1554767_s_at	CRYZL1	-0.590105	1.87653e-05	0.00179477
1554768_a_at	MAD2L1	-0.488494	0.0001269	0.00541965
1554789_a_at	PDE8B	-0.45339	0.000778972	0.0162323
1554796_at	DPP6	-0.378986	0.000225989	0.00765152
1554801_at	FNDC9	-0.512239	0.000939602	0.0182916
1554834_a_at	RASSF5	-0.5558	4.82624e-06	0.000800692
1554868_s_at	PCNP	-0.500872	3.81422e-05	0.00271009
1554869_at	WDR37	-0.293676	0.000818842	0.0168194
1555020_a_at	ARHGAP20	-0.422663	1.06825e-05	0.00125899
1555088_x_at	STAT5B	-0.444002	0.00121314	0.0213761
1555092_at	VASH2	-0.372163	0.00330773	0.0376054
1555098_a_at	CACNB2	-0.599586	5.59482e-05	0.00343945
1555140_a_at	BCL2L2	-0.43106	0.00321589	0.0370704
1555181_a_at	ST3GAL3	-0.451956	0.000275619	0.00862956
1555193_a_at	ZNF277	-0.351745	0.00438034	0.0441669
1555201_a_at	RMND1	-0.379302	2.64931e-05	0.00215213
1555202_a_at	RPRD1A	-0.661522	3.11727e-05	0.00239259
1555270_a_at	WFS1	0.493441	0.000194991	0.00703846
1555388_s_at	SNX25	-0.274118	0.00495982	0.0475955
1555461_at	TXNL4A	-0.376692	0.0043215	0.0437855
1555467_a_at	CELF1	-0.356361	0.00363395	0.0396455
1555470_a_at	PPM1F	-0.333012	0.0032272	0.0371313
1555487_a_at	ACTR3B	-0.524908	7.60567e-05	0.00399599
1555514_a_at	PIAS2	-0.558732	1.91611e-05	0.00179907
1555548_at	NDUFA10	-0.264667	0.00120397	0.0212406
1555611_s_at	MBD1	-0.278957	0.00482891	0.0469316
1555618_s_at	SAE1	-0.596402	1.07186e-05	0.0012598
1555656_at	CD300LG	-0.397508	0.00282895	0.0347138
1555679_a_at	RTN4IP1	-0.389721	0.000352283	0.0100508
1555702_a_at	ST3GAL3	-0.323793	0.00142331	0.0234869
1555715_a_at	HRH3	-0.320674	0.00488796	0.0472105
1555758_a_at	CDKN3	-0.386178	0.00136985	0.0228982
1555764_s_at	TIMM10	-0.39309	5.8264e-05	0.00351991
1555780_a_at	RHEB	-0.522142	2.48387e-07	0.000150904
1555797_a_at	ARPC5	-0.511512	7.80005e-05	0.0040448
1555800_at	ZNF385B	-0.636553	0.00136502	0.0228408
1555801_s_at	ZNF385B	-0.748797	0.000198165	0.00710843
1555823_at	PACS2	-0.366786	0.00378012	0.0406104
1555902_at	ARMCX5	-0.378401	0.000533951	0.012916
1555910_at	PTCD2	-0.372959	9.09292e-05	0.00444697
1555961_a_at	HINT1	-0.276779	4.76074e-05	0.00311428
1555970_at	FBXO28	-0.439782	0.00408546	0.0424852
1555971_s_at	FBXO28	-0.289033	0.00133473	0.0225734
1555972_s_at	FBXO28	-0.418188	0.000602391	0.0139198
1555982_at	ZFYVE16	-0.335415	0.000554355	0.0132257
1556029_s_at	NMNAT2	-0.860265	0.00106226	0.0196908
1556066_at	KDM6B	0.319516	0.000519692	0.01268
1556067_a_at	KDM6B	0.289063	0.000526538	0.0127956
1556128_a_at	RASGRF2	-0.35049	0.00176457	0.0266101
1556151_at	ITFG1	-0.303419	1.52979e-05	0.00157488
1556244_s_at	LOC375196	-0.266809	0.00442665	0.0444572
1556279_at	TSEN2	-0.280259	0.000110898	0.00503005
1556285_s_at	PPA2	-0.681871	1.31181e-06	0.000382013
1556365_at	LY86-AS1	-0.687998	0.000181647	0.00673718
1556366_s_at	LY86-AS1	-0.572093	0.00319629	0.0369619
1556389_at	CNPY3	0.483389	0.000479356	0.0121202
1556588_at	ST20-AS1	-0.297888	0.00114745	0.0206503
1556633_at	SNHG28	-0.298604	0.00346349	0.0384684
1556747_a_at	LOC101928343	-0.308068	0.0020603	0.0291838
1556748_x_at	LOC101928343	-0.403598	0.00352572	0.0389056
1556797_at	GRASLND	-0.506565	0.00203756	0.0289589
1556798_a_at	GRASLND	-0.469958	0.00013438	0.00562766
1556894_at	NT5DC2	0.340266	0.00211683	0.0296371
1556900_at	APCDD1L-DT	-0.315903	0.00460958	0.0456565
1557000_at	ESPNL	-0.317919	0.00451328	0.0450543
1557002_x_at	ESPNL	-0.263931	0.002168	0.0299679
1557034_s_at	WASHC1	-0.272376	0.00431689	0.043783
1557042_at	KCNQ3	-0.405033	0.00303223	0.0359328
1557107_at	SLC26A4-AS1	-0.723364	1.45806e-07	0.000125571
1557121_s_at	HEATR6	0.264728	0.00211758	0.0296371
1557128_at	FAM111B	-0.301099	0.00176496	0.0266101
1557137_at	TMEM17	-0.380723	0.00031029	0.00928829
1557145_at	STK38	0.373043	5.0723e-05	0.00325102
1557180_at	C11orf87	-1.32513	3.42096e-08	5.90253e-05
1557181_s_at	C11orf87	-0.986476	1.85356e-06	0.000454423
1557194_a_at	RAD54L2	-0.325056	0.000318446	0.00944066
1557276_at	LINC01016	-0.371805	0.00250196	0.0324772
1557278_s_at	TNPO1	0.263994	0.0013439	0.022653
1557388_at	RTTN	-0.347076	0.00323048	0.0371492
1557475_at	LINC00507	-0.977834	0.0001085	0.00496831
1557582_at	BIN3	-0.343296	0.00346164	0.0384643
1557795_s_at	NTRK3	-0.346979	0.000426065	0.0112981
1557799_at	SELENOH	-0.293184	0.000369616	0.0103395
1557801_x_at	SELENOH	-0.267081	0.000548704	0.0131345
1557828_a_at	TMEM267	0.555571	0.00207876	0.0293319
1557848_at	LINC02401	-0.341962	0.00108087	0.0199177
1557918_s_at	SLC16A1	0.440206	0.00529927	0.0496814
1557943_at	CNP	0.596177	0.00347614	0.0385557
1557961_s_at	C8orf88	-0.905012	7.73506e-05	0.00403961
1557986_s_at	SMCR8	-0.296476	0.000128406	0.00545693
1558015_s_at	ACTR2	-0.745516	0.000781602	0.0162714
1558034_s_at	CP	0.548807	0.00100138	0.0190789
1558093_s_at	MATR3	-0.709476	0.000363518	0.0102486
1558122_s_at	CSRNP3	-0.547665	0.00418769	0.0431215
1558136_s_at	TAF11	-0.432322	7.55616e-05	0.00398941
1558154_at	LLGL2	0.268819	0.00154197	0.0247382
1558195_at	LINC00592	-0.308614	0.00103696	0.0194052
1558215_s_at	UBTF	0.287348	0.00168669	0.0260027
1558230_at	SF3B2	-0.303319	0.00191569	0.0279159
1558254_s_at	SRPK2	-0.592175	7.61936e-06	0.00104007
1558293_at	BTBD8	-0.551029	0.00117176	0.0209027
1558295_a_at	PPFIA2	-0.360688	0.000216106	0.00746654
1558397_at	PECAM1	0.314132	0.0021632	0.0299597
1558414_at	FRRS1L	-0.611757	0.00186038	0.0274204
1558501_at	DNM3	0.315781	0.00349269	0.0386697
1558527_at	PAXIP1-AS2	0.296084	0.000938465	0.018284
1558541_at	TRMT9B	-0.522197	2.71839e-05	0.00218954
1558584_at	UBL4B	-0.283794	0.00457355	0.0454249
1558604_a_at	SSBP2	-0.442172	0.000178271	0.00665201
1558620_at	ZNF621	0.375735	0.00159306	0.0251664
1558648_at	CCDC32	-0.275057	0.00129133	0.0221389
1558680_s_at	PDE1A	-0.831396	0.000694289	0.0151483
1558738_at	NOL3	0.31232	0.00376219	0.0404593
1558820_a_at	CCDC178	-0.374439	0.00104159	0.0194667
1558924_s_at	CLIP1	0.738468	0.000253738	0.00821096
1558930_at	LINC00460	-0.470042	0.000276637	0.00864065
1558959_at	FAM126B	-0.904988	1.2788e-05	0.00140717
1559033_at	LINC01018	-0.444243	2.43811e-05	0.00204607
1559045_at	LOC100128288	0.292976	0.000641722	0.0144467
1559205_s_at	LINC02273	-0.353082	0.000817141	0.0168005
1559235_a_at	SOX30	-0.267773	0.00022979	0.00772011
1559244_at	FMN2	0.381828	0.000849167	0.0172696
1559293_x_at	LINC00032	-0.270581	0.00145015	0.0237738
1559355_at	NXPH2	-0.311302	0.00286372	0.0349439
1559388_a_at	LYNX1	-0.367104	0.0024305	0.0319612
1559479_at	SEPSECS-AS1	0.273457	0.00157766	0.0250746
1559481_at	CHIC1	-0.636364	4.41137e-06	0.000761138
1559490_at	LRCH3	0.517905	0.0034638	0.0384684
1559526_at	LOC101930421	0.458971	0.00301609	0.0358499
1559544_s_at	RB1-DT	-0.264939	0.00215864	0.029955
1559585_at	DDX60L	-0.26579	9.00615e-05	0.00441455
1560081_at	RAD51-AS1	0.266835	0.000539544	0.0129886
1560100_at	DLX1	-0.267489	0.00432699	0.043803
1560149_at	SLC29A2	-0.3374	0.00129358	0.0221687
1560151_x_at	SLC29A2	-0.289755	0.00294777	0.0354591
1560513_at	LINC01996	-0.386519	0.00404022	0.0422587
1560554_a_at	OBSCN-AS1	-0.283807	0.000330757	0.00963349
1560589_a_at	LINC02683	-0.299945	0.00306873	0.036137
1560692_at	VSTM2A-OT1	-0.620724	0.00101534	0.0192681
1560826_at	LOC101929398	-0.279016	0.00265368	0.0335581
1560939_at	PCOLCE-AS1	-0.387007	0.00179686	0.0268817
1561027_at	LINC02223	-0.299461	0.00114951	0.0206503
1561060_at	LOC101929752	-0.293807	0.00201454	0.0288121
1561303_at	LINC01568	-0.301618	0.00137927	0.0229468
1561436_at	MARCHF10-DT	-0.308539	0.00269262	0.0337341
1561536_at	LINC02825	-0.305122	0.000516926	0.0126595
1562012_at	LOC100506730	0.39467	0.00312166	0.0365507
1562052_at	LOC101927159	-0.346257	2.88405e-05	0.00226666
1562074_a_at	UNC13C	-0.383334	0.00104875	0.0195581
1562081_a_at	LINC00424	-0.287226	0.000263934	0.00840269
1562234_a_at	NAV3	-0.544863	0.00266282	0.0336004
1562254_at	STK35	-0.350556	0.000242719	0.00795569
1562409_s_at	LOC101926984	-0.398215	0.00168223	0.0259636
[truncated: 8,885 more rows]
