# Supplementary material for: Genome-wide transcriptome profiling and development of age prediction models in the human brain
Source: Aging (Albany NY). 2024 Feb 28;16(5):4075–94. doi: 10.18632/aging.205609 (PMC10968712; doi:10.18632/aging.205609)
Supplement: Supplementary Table 3 [file aging-16-205609-s004.xlsx]

## Sheet: Sheet1
Supplementary Table 3. Overlaps of differentially regulated transcripts in the old and elderly categories within sex, related to Figure 1.
Female Age 21-39 (ref.) vs. 65-84 and 85-105 group DEGs overlaps
Probe set	Symbol	Chr. Loc.	logFC age65-84	logFC age85-105
1552293_at	TMEM196	chr7:19719315-19773617	-0.4042	-0.373728
1552924_a_at	PITPNM2	chr12:122983480-123151090	-0.585016	-0.525415
1566989_at	ARID1B	chr6:156776360-156778422	0.445206	0.395363
201302_at	ANXA4	chr2:69644425-69827112	0.762741	0.728826
201309_x_at	NREP	chr5:111662621-111997464	-1.07117	-1.10761
201481_s_at	PYGB	chr20:25248085-25298012	0.427578	0.372157
201924_at	AFF1	chr4:86935002-87141039	0.789013	0.705839
202112_at	VWF	chr12:5948877-6124770	0.883672	0.832364
202545_at	PRKCD	chr3:53156009-53192717	-0.678177	-0.597627
202975_s_at	RHOBTB3	chr5:95713522-95824383	1.11285	1.16293
203038_at	PTPRK	chr6:127968779-128524810	0.537116	0.442103
203124_s_at	SLC11A2	chr12:50979401-51028566	0.557858	0.483179
203367_at	DUSP14	chr17:37494470-37518136	-0.597847	-0.433613
203414_at	MMD	chr17:55392622-55421924	-0.788168	-0.784758
203540_at	GFAP	chr17:44903159-44916937	1.47817	1.0455
203549_s_at	LPL	chr8:19901717-19967259	1.0981	0.742518
203687_at	CX3CL1	chr16:57372477-57385044	-0.541828	-0.433588
203723_at	ITPKB	chr1:226631690-226739323	1.23789	1.01871
203921_at	CHST2	chr3:143119771-143124014	-0.583135	-0.449885
204041_at	MAOB	chrX:43766610-43882450	0.711994	0.50155
204134_at	PDE2A	chr11:72576141-72674591	-0.39387	-0.335008
204392_at	CAMK1	chr3:9757347-9769992	-0.535207	-0.495772
204723_at	SCN3B	chr11:123629187-123655244	-0.805821	-0.693853
205330_at	MN1	chr22:27748277-27801756	-0.726254	-0.617598
205591_at	OLFM1	chr9:135075422-135121180	-0.647565	-0.537938
205625_s_at	CALB1	chr8:90058608-90095475	-1.42871	-1.93869
205626_s_at	CALB1	chr8:90058608-90095475	-1.37944	-2.20402
205630_at	CRH	chr8:66176376-66178464	-2.13608	-1.60238
205874_at	ITPKA	chr15:41493393-41503551	-0.691376	-0.714041
205901_at	PNOC	chr8:28316986-28343355	-0.755932	-0.544179
205952_at	KCNK3	chr2:26692722-26733420	-0.703643	-0.66112
206023_at	NMU	chr4:55595229-55636698	-0.826597	-0.642848
206084_at	PTPRR	chr12:70638073-70920738	-0.776387	-0.80305
206208_at	CA4	chr17:60149942-60170899	-0.846643	-0.697493
206209_s_at	CA4	chr17:60149942-60170899	-1.01533	-0.702431
206384_at	CACNG3	chr16:24256335-24362412	-0.664242	-0.481926
206577_at	VIP	chr6:152750797-152759765	-1.47003	-1.39078
208116_s_at	MAN1A1	chr6:119177205-119349761	-0.879014	-0.964684
208465_at	GRM2	chr3:51707068-51718613	-0.543274	-0.434645
208877_at	PAK2	chr3:196739857-196832647	0.590856	0.408225
209685_s_at	PRKCB	chr16:23835983-24220611	-0.481519	-0.353451
209869_at	ADRA2A	chr10:111077029-111080907	-0.769136	-0.683388
210182_at	CORT	chr1:10430102-10452153	-0.679157	-0.564457
210263_at	KCNF1	chr2:10911934-10914225	-0.59909	-0.532179
210408_s_at	CPNE6	chr14:24070836-24078099	-0.624498	-0.495117
210675_s_at	PTPRR	chr12:70638073-70920738	-0.908794	-0.776006
210817_s_at	CALCOCO2	chr17:48831018-48866522	0.619143	0.584255
212274_at	LPIN1	chr2:11677595-11827409	0.571188	0.428636
212586_at	CAST	chr5:96525267-96779595	0.544134	0.435803
213096_at	TMCC2	chr1:205227946-205285632	0.430541	0.395945
213131_at	OLFM1	chr9:135075422-135121180	-0.589455	-0.591949
213325_at	NECTIN3	chr3:111070071-111275563	-1.12091	-1.25004
213327_s_at	USP12	chr13:27066156-27171811	-0.400561	-0.348303
213338_at	TMEM158	chr3:45224466-45226287	-0.826542	-0.568227
213496_at	PLPPR4	chr1:99264292-99309590	-0.799086	-0.724451
213791_at	PENK	chr8:56436674-56446671	-0.996766	-0.935778
214595_at	KCNG1	chr20:51003656-51023107	-1.04071	-1.15327
214811_at	RIMBP2	chr12:130396133-130768228	-0.735507	-0.612659
214965_at	SPATA2L	chr16:89696357-89701705	-0.763809	-0.606333
216048_s_at	RHOBTB3	chr5:95713522-95824383	1.08511	0.984393
218623_at	NSG2	chr5:174045706-174243501	-0.567545	-0.457327
218866_s_at	POLR3K	chr16:46407-53608	-0.511506	-0.508937
218868_at	ACTR3B	chr7:152759749-152855378	-0.634212	-0.982436
218888_s_at	NETO2	chr16:47077703-47143945	-1.0136	-0.969137
219939_s_at	CSDE1	chr1:114716913-114758676	0.537023	0.350963
220331_at	CYP46A1	chr14:99684298-99727301	-0.635454	-0.742031
220677_s_at	ADAMTS8	chr11:130404923-130428609	-0.641383	-0.447287
220889_s_at	CA10	chr17:51630313-52160017	-0.753446	-1.02617
221904_at	FAM131A	chr3:184335926-184348421	-0.703579	-0.431671
222473_s_at	ERBIN	chr5:65883128-66082546	1.06831	0.922565
222774_s_at	NETO2	chr16:47077703-47143945	-1.23694	-1.30319
223226_x_at	SSBP4	chr19:18418864-18434562	-0.456739	-0.429297
223382_s_at	ZNRF1	chr16:74999024-75110994	-0.566825	-0.484568
223383_at	ZNRF1	chr16:74999024-75110994	-0.634815	-0.408583
224393_s_at	TMEM121B	chr22:17116297-17121367	-0.640902	-0.375042
224818_at	SORT1	chr1:109309568-109397918	0.403423	0.302209
224840_at	FKBP5	chr6:35573585-35728583	1.78444	2.09888
224856_at	FKBP5	chr6:35573585-35728583	1.48564	1.70736
224896_s_at	TTL	chr2:112482156-112541739	-0.479058	-0.666975
224908_s_at	TTL	chr2:112482156-112541739	-0.631224	-0.749724
225202_at	RHOBTB3	chr5:95713522-95824383	1.25012	1.10756
225739_at	RAB11FIP4	chr17:31391675-31538211	-0.473472	-0.550322
227015_at	ASPHD2	chr22:26429260-26445015	-0.542298	-0.720547
227408_s_at	SNX25	chr4:185204237-185370185	-0.54095	-0.494696
227530_at	AKAP12	chr6:151239967-151358559	0.491729	0.369739
228135_at	C1orf52	chr1:85249953-85259672	-0.405993	-0.391452
228368_at	ARHGAP20	chr11:110577042-110713189	-0.863491	-0.718944
228501_at	GALNT15	chr3:16174680-16231992	1.12119	0.799085
229254_at	MFSD4A	chr1:205568885-205602918	-0.595872	-0.780202
229430_at	VXN	chr8:66432486-66518524	-0.394852	-0.453365
229799_s_at	NCAM1	chr11:112961247-113278436	0.749294	0.597814
230755_at	RHBDL3	chr17:32265832-32324659	0.582848	0.585426
230765_at	NWD2	chr4:37244743-37449463	-0.862317	-1.08987
230923_at	TAFA1	chr3:68004247-68545621	-0.773152	-0.842116
231186_at	LINC00643	chr14:62075340-62128421	-0.528644	-0.559411
231935_at	ARPP21	chr3:35638945-35794496	-0.680871	-0.693988
232027_at	SYNE1	chr6:152121687-152637801	-0.724727	-0.73777
235591_at	SSTR1	chr14:38207904-38213067	-0.845535	-1.07643
236361_at	GALNT15	chr3:16174680-16231992	0.944485	0.721789
236377_at	TMEM132D	chr12:129071725-129904025	-0.524429	-0.605805
237939_at	EPHA5	chr4:65319563-65670495	-0.745873	-0.721177
238815_at	LRRTM1	chr2:80288351-80304752	-0.626313	-0.826447
244675_at	RGS8	chr1:182641816-182684587	-0.811555	-0.645841
823_at	CX3CL1	chr16:57372477-57385044	-0.672432	-0.633198
Male Age 21-39 (ref.) vs. 65-84 and 85-105 group DEGs overlap
Probe set	Symbol	Chr. Loc.	logFC age 65-84	logFC age 85-105
1438_at	EPHB3	chr3:184561785-184582408	-0.295969	-0.344463
1552264_a_at	MAPK1	chr22:21759657-21867680	-0.728984	-1.00398
1552293_at	TMEM196	chr7:19719315-19773617	-0.279813	-0.392944
1552344_s_at	CNOT7	chr8:17224966-17246878	-0.565967	-0.680336
1552410_at	CLEC4F	chr2:70808643-70820599	-0.289915	-0.357646
1552426_a_at	TM2D3	chr15:101621444-101652391	-0.469991	-0.460038
1552481_s_at	MAN1A2	chr1:117367449-117528872	-0.29017	-0.46237
1552618_at	STX6	chr1:180944042-180976482	-0.357186	-0.481183
1552658_a_at	NAV3	chr12:77324641-78213010	-0.585837	-0.742986
1552660_a_at	C5orf22	chr5:31532287-31555053	-0.536634	-0.742122
1552666_a_at	LRRC7	chr1:69567922-70151945	-0.624091	-0.847003
1552715_a_at	RXFP1	chr4:158315311-158653372	-0.774219	-0.996596
1552722_at	ARPP21	chr3:35638945-35794496	-1.69544	-1.95744
1552752_a_at	CADM2	chr3:84958989-86074429	-0.552954	-0.784501
1552754_a_at	CADM2	chr3:84958989-86074429	-0.351173	-0.83217
1552774_a_at	SLC25A27	chr6:46652915-46678190	-0.66052	-0.794353
1552897_a_at	KCNG3	chr2:42442017-42493982	-0.315937	-0.41653
1552924_a_at	PITPNM2	chr12:122983480-123151090	-0.394419	-0.544902
1552978_a_at	SCAMP1	chr5:78360611-78480739	-0.630244	-1.39939
1553136_at	KCTD18	chr2:200488958-200519784	-0.300029	-0.396235
1553181_at	DDX31	chr9:132592997-132670401	-0.335256	-0.360928
1553194_at	NEGR1	chr1:71395943-72282539	-0.916521	-1.10282
1553218_a_at	ZNF512	chr2:27582969-27623217	-0.28119	-0.525845
1553410_a_at	ABCC12	chr16:48080882-48156018	-0.408367	-0.511877
1553510_s_at	CNOT9	chr2:219445282-219458999	-0.52682	-0.463127
1553533_at	JPH1	chr8:74234700-74321540	-0.351784	-0.400646
1553602_at	MUCL1	chr12:54830518-54896008	-0.460064	-0.442792
1553603_s_at	ATL2	chr2:38293954-38377285	-0.499507	-0.817133
1553698_a_at	CCSAP	chr1:229321011-229343294	-0.896323	-0.890327
1553704_x_at	ZNF791	chr19:12610918-12633840	0.321511	0.384482
1553713_a_at	RHEBL1	chr12:49064676-49070025	-0.449184	-0.514425
1553864_at	GPR26	chr10:123666355-123697399	-0.820659	-1.55145
1553865_a_at	GPR26	chr10:123666355-123697399	-0.73807	-0.821725
1553959_a_at	B3GALT6	chr1:1232237-1235041	-0.278233	-0.326986
1554057_at	ASH1L-AS1	chr1:155562026-155563944	-0.274973	-0.398275
1554065_at	MVB12B	chr9:126326829-126507041	-0.280496	-0.304283
1554093_a_at	SNAPC5	chr15:66490135-66497780	-0.500881	-0.440886
1554099_a_at	SPIN3	chrX:56818298-56995827	-0.335054	-0.373863
1554105_at	TMEM185A	chrX:149596556-149631912	-0.294281	-0.30995
1554112_a_at	ULK2	chr17:19770829-19867936	-0.387586	-0.407419
1554145_a_at	PPP1R21	chr2:48440598-48515391	-0.572746	-0.735981
1554161_at	SLC25A27	chr6:46652915-46678190	-0.716733	-1.13369
1554170_a_at	MBLAC1	chr7:100126785-100128495	-0.390767	-0.403462
1554248_at	ZNF638	chr2:71558884-71607696	-0.290499	-0.394146
1554256_a_at	PCNX2	chr1:233270757-233393942	-0.362895	-0.490414
1554292_a_at	UHRF1BP1L	chr12:100028455-100142874	-0.392453	-0.519604
1554333_at	DNAJA4	chr15:78264086-78282196	-0.921319	-1.22202
1554346_at	GNB5	chr15:52115100-52191392	-0.279529	-0.313358
1554351_a_at	TIPRL	chr1:168178962-168202109	-0.361605	-0.479498
1554365_a_at	PPP2R5C	chr14:101761709-101927989	-0.504445	-0.518107
1554393_a_at	AZIN2	chr1:33081104-33123492	-0.378173	-0.406995
1554396_at	UEVLD	chr11:18529609-18588747	-0.325858	-0.301723
1554417_s_at	APH1A	chr1:150265399-150269580	-0.298102	-0.358261
1554443_s_at	BEST1	chr11:61950063-61965515	0.280737	0.387496
1554462_a_at	DNAJB9	chr7:108569867-108574850	-0.711618	-0.718004
1554471_a_at	ANKRD13C	chr1:70258999-70354734	-0.316035	-0.472854
1554500_a_at	RGS7	chr1:240767636-241357374	-0.950559	-1.31337
1554501_at	TSC22D4	chr7:100463359-100479232	0.284011	0.524109
1554509_a_at	MINDY3	chr10:15820852-15902497	-0.537643	-0.758312
1554510_s_at	GHITM	chr10:84139482-84154841	-0.536791	-0.693803
1554524_a_at	OLFM3	chr1:101802560-101996926	-0.626434	-0.681011
1554526_at	OLFM3	chr1:101802560-101996926	-0.612722	-0.611644
1554530_at	VSTM2A	chr7:54542325-54571080	-0.518274	-0.698338
1554539_a_at	RHOF	chr12:121777754-121803403	-0.345704	-0.439831
1554553_s_at	YIF1B	chr19:38303558-38317273	-0.331274	-0.460167
1554569_a_at	CELF2	chr10:10798397-11336675	-0.448397	-0.561659
1554577_a_at	PSMD10	chrX:108084207-108091549	-0.287471	-0.407851
1554592_a_at	SLC1A6	chr19:14950033-15022990	-0.836695	-0.70146
1554593_s_at	SLC1A6	chr19:14950033-15022990	-0.863333	-0.777281
1554600_s_at	LMNA	chr1:156082573-156140081	0.328903	0.406765
1554607_at	CNKSR2	chrX:21372801-21654695	-0.623105	-1.01375
1554633_a_at	MYT1L	chr2:1789113-2331664	-1.24751	-1.90807
1554661_s_at	CNST	chr1:246566444-246668595	-0.707505	-0.74447
1554678_s_at	HNRNPDL	chr4:82422565-82430462	-0.547131	-0.546309
1554679_a_at	LAPTM4B	chr8:97775057-97853013	-0.628861	-0.645717
1554680_s_at	KCNS2	chr8:98426958-98432853	-0.27012	-0.388946
1554689_a_at	NLGN4X	chrX:5840637-6228867	-0.424099	-0.546013
1554767_s_at	CRYZL1	chr21:33589341-33643926	-0.590105	-0.530621
1554768_a_at	MAD2L1	chr14:60779978-60780595	-0.488494	-0.552747
1554789_a_at	PDE8B	chr5:77086732-77427124	-0.45339	-0.599051
1554801_at	FNDC9	chr5:157341596-157460100	-0.512239	-0.880887
1554834_a_at	RASSF5	chr1:206507531-206589448	-0.5558	-0.69928
1554868_s_at	PCNP	chr3:101574180-101594465	-0.500872	-0.442769
1555020_a_at	ARHGAP20	chr11:110577042-110713189	-0.422663	-0.553352
1555088_x_at	STAT5B	chr17:42199176-42288633	-0.444002	-0.611431
1555092_at	VASH2	chr1:212950520-212992037	-0.372163	-0.577982
1555098_a_at	CACNB2	chr10:18140424-18543557	-0.599586	-0.871394
1555181_a_at	ST3GAL3	chr1:43705824-43931165	-0.451956	-0.445218
1555201_a_at	RMND1	chr6:151398898-151452158	-0.379302	-0.5762
1555202_a_at	RPRD1A	chr18:35984387-36067576	-0.661522	-0.820982
1555388_s_at	SNX25	chr4:185204237-185370185	-0.274118	-0.337697
1555461_at	TXNL4A	chr18:79970813-80033949	-0.376692	-0.528874
1555467_a_at	CELF1	chr11:47465933-47565569	-0.356361	-0.574964
1555487_a_at	ACTR3B	chr7:152759749-152855378	-0.524908	-0.776542
1555514_a_at	PIAS2	chr18:46803218-46920160	-0.558732	-0.790061
1555611_s_at	MBD1	chr18:50266882-50281774	-0.278957	-0.349797
1555618_s_at	SAE1	chr19:47113274-47210636	-0.596402	-0.972125
1555679_a_at	RTN4IP1	chr6:106570771-106629498	-0.389721	-0.561219
1555702_a_at	ST3GAL3	chr1:43650149-43931014	-0.323793	-0.344793
1555715_a_at	HRH3	chr20:62214960-62220278	-0.320674	-0.406101
1555780_a_at	RHEB	chr10:47706203-47706802	-0.522142	-0.449391
1555797_a_at	ARPC5	chr1:183620846-183635783	-0.511512	-0.562221
1555800_at	ZNF385B	chr2:179441982-179861612	-0.636553	-0.816658
1555801_s_at	ZNF385B	chr2:179441982-179861612	-0.748797	-1.0225
1555910_at	PTCD2	chr5:72320367-72368395	-0.372959	-0.462634
1555961_a_at	HINT1	chr5:131155383-131224468	-0.276779	-0.335658
1555982_at	ZFYVE16	chr5:80411231-80488095	-0.335415	-0.468271
1556029_s_at	NMNAT2	chr1:183248237-183418380	-0.860265	-1.37471
1556066_at	KDM6B	chr17:7834217-7854796	0.319516	0.341385
1556151_at	ITFG1	chr16:47154387-47464149	-0.303419	-0.272978
1556285_s_at	PPA2	chr4:105369077-105474067	-0.681871	-0.512799
1556894_at	NT5DC2	chr3:52567983-52570268	0.340266	0.563262
1557042_at	KCNQ3	chr8:132120859-132481095	-0.405033	-0.470255
1557180_at	C11orf87	chr11:109422190-109429167	-1.32513	-1.37833
1557181_s_at	C11orf87	chr11:109422190-109429167	-0.986476	-1.52226
1557194_a_at	RAD54L2	chr3:51538719-51668667	-0.325056	-0.340055
1557388_at	RTTN	chr18:70003031-70205726	-0.347076	-0.633304
1557475_at	LINC00507	chr12:127914707-127960028	-0.977834	-1.19974
1557795_s_at	NTRK3	chr15:87859751-88256791	-0.346979	-0.389142
1557799_at	SELENOH	chr11:57510446-57511016	-0.293184	-0.296812
1557801_x_at	SELENOH	chr11:57510446-57511016	-0.267081	-0.299649
1557943_at	CNP	chr17:41966763-41977740	0.596177	1.1237
1557961_s_at	C8orf88	chr8:90958471-90985238	-0.905012	-1.07018
1557986_s_at	SMCR8	chr17:18315293-18328056	-0.296476	-0.418933
1558034_s_at	CP	chr3:149162410-149221829	0.548807	0.706609
1558093_s_at	MATR3	chr5:139293674-139331677	-0.709476	-1.01855
1558122_s_at	CSRNP3	chr2:165469647-165689407	-0.547665	-0.853127
1558136_s_at	TAF11	chr6:34877462-34889192	-0.432322	-0.369375
1558154_at	LLGL2	chr17:73561358-73563545	0.268819	0.493603
1558195_at	LINC00592	chr12:52164115-52223813	-0.308614	-0.470468
1558230_at	SF3B2	chr11:66050729-66069308	-0.303319	-0.401568
1558254_s_at	SRPK2	chr7:105110704-105399308	-0.592175	-0.747761
1558293_at	BTBD8	chr1:92647284-92649199	-0.551029	-0.933374
1558295_a_at	PPFIA2	chr12:81257975-81759553	-0.360688	-0.347857
1558414_at	FRRS1L	chr9:109130293-109167249	-0.611757	-1.06473
1558604_a_at	SSBP2	chr5:81412804-81751797	-0.442172	-0.454328
1558620_at	ZNF621	chr3:40524878-40574685	0.375735	0.603397
1558680_s_at	PDE1A	chr2:182139968-182523359	-0.831396	-1.27125
1558820_a_at	CCDC178	chr18:32937402-33441101	-0.374439	-0.414661
1558959_at	FAM126B	chr2:200973718-201071671	-0.904988	-1.00167
1559479_at	SEPSECS-AS1	chr4:25160641-25201440	0.273457	0.318757
1559481_at	CHIC1	chrX:73563197-73687111	-0.636364	-0.724041
1559526_at	LOC101930421	chr10:628620-631255	0.458971	0.798619
1560081_at	RAD51-AS1	chr15:40686183-40695107	0.266835	0.350729
1560151_x_at	SLC29A2	chr11:66135746-66138331	-0.289755	-0.403948
1560589_a_at	LINC02683	chr11:13942994-13943509	-0.299945	-0.372047
1560692_at	VSTM2A-OT1	chr7:54556970-54571726	-0.620724	-1.05578
1560826_at	LOC101929398	chr8:56494309-56559823	-0.279016	-0.336606
1561060_at	LOC101929752	chr2:11721619-11724222	-0.293807	-0.461274
1562012_at	LOC100506730	chr1:19620036-19621078	0.39467	0.49232
1562254_at	STK35	chr20:2124632-2129196	-0.350556	-0.325789
1562409_s_at	LOC101926984	chr17:28263630-28275974	-0.398215	-0.508705
1562563_at	HCN1	chr5:45254948-45696498	-0.304501	-0.332267
1562713_a_at	NETO1	chr18:72742314-72868146	-0.385224	-0.701542
1563034_at	GPD1	chr12:50103982-50111313	0.263384	0.306136
1563111_a_at	PIGX	chr3:196639775-196736007	-0.345707	-0.573998
1563744_a_at	DISC1	chr1:231626790-232041272	-0.295544	-0.317146
1564053_a_at	YTHDF3	chr8:63168553-63212786	-0.719508	-0.822821
1564063_a_at	ATP11B	chr3:182793503-182921629	-0.450644	-0.516481
1564129_a_at	QPRT	chr16:29707117-29709316	-0.323238	-0.418362
1564158_a_at	VAC14-AS1	chr16:70755035-70773251	0.453584	0.44334
1564746_at	SLC9B2	chr4:103019868-103085829	-0.413062	-0.615518
1564883_a_at	TAS1R1	chr1:6555307-6579755	-0.266237	-0.366306
1566509_s_at	FBXO9	chr6:53051991-53100873	-0.534351	-0.983982
1568603_at	CADPS	chr3:62398346-62875416	-0.857803	-1.32045
1568827_at	LOC401442	chr8:738548-740374	-0.389896	-0.383235
1568933_at	LYPD8	chr1:248721993-248722201	-0.465543	-0.656825
1569013_s_at	BMS1P20	chr2:94193659-94208426	-0.459191	-0.486501
1569089_a_at	LINC00957	chr7:44039171-44042306	-0.332682	-0.428105
1569421_at	CLDN4	chr7:73799542-73832690	-0.283858	-0.364947
1569700_s_at	AK7	chr14:96392128-96489427	-0.336622	-0.433299
1569905_at	HSD11B1L	chr19:5680604-5688523	-0.301529	-0.317483
1570185_at	LOC105378568	chr10:134246827-134254988	-0.280088	-0.363884
1570253_a_at	RHEBL1	chr12:49064676-49070025	-0.638288	-0.59775
200015_s_at	SEPTIN2	chr2:242254784-242293439	0.533154	0.678935
200056_s_at	C1D	chr10:32511336-32511737	-0.684182	-0.566873
200068_s_at	CANX	chr5:179679612-179732514	0.288566	0.343527
200093_s_at	HINT1	chr5:131155383-131224468	-0.380321	-0.447192
200097_s_at	HNRNPK	chr9:83969748-83969857	-0.302131	-0.299186
200603_at	PRKAR1A	chr17:68511780-68551319	-0.354745	-0.393775
200604_s_at	PRKAR1A	chr17:68511780-68551319	-0.694578	-0.740927
200605_s_at	PRKAR1A	chr17:68511780-68551319	-0.351134	-0.296906
200624_s_at	MATR3	chr5:139293674-139331677	-0.324454	-0.44906
200632_s_at	NDRG1	chr8:133237175-133302022	0.544209	0.791015
200638_s_at	YWHAZ	chr8:100916523-100953388	-0.35266	-0.574164
200641_s_at	YWHAZ	chr10:23136924-23137661	-0.719283	-1.05769
200676_s_at	UBE2L3	chr22:21549447-21624034	0.346617	0.430174
200677_at	PTTG1IP	chr21:44849585-44873903	0.6923	0.719673
200696_s_at	GSN	chr9:121207794-121332843	0.700019	0.669399
200701_at	NPC2	chr14:74476192-74494177	0.492948	0.700686
200704_at	LITAF	chr16:11547722-11636381	0.539822	0.88339
200710_at	ACADVL	chr17:7217125-7225266	0.415797	0.579898
200713_s_at	MAPRE1	chr20:32819954-32850405	0.381766	0.556416
200720_s_at	ACTR1A	chr10:102461881-102502712	-0.302211	-0.563136
200731_s_at	PTP4A1	chr6:63572472-63583587	-0.570558	-0.49486
200737_at	PGK1	chrX:77910739-78129295	-0.521271	-0.567371
200738_s_at	PGK1	chrX:77910739-78129295	-0.414929	-0.455923
200739_s_at	SUMO3	chr21:44805617-44818779	-0.500658	-0.501078
200749_at	RAN	chr12:130872037-130877678	-0.445756	-0.487899
200750_s_at	RAN	chr12:30475446-30476096	-0.393558	-0.354554
200753_x_at	SRSF2	chr17:76734115-76737333	-0.574071	-0.466503
200756_x_at	CALU	chr7:128739292-128773400	-0.284751	-0.348765
200768_s_at	MAT2A	chr2:85539168-85545281	0.373456	0.391358
200772_x_at	PTMA	chr2:232573235-232578251	0.555164	0.69547
200773_x_at	PTMA	chr13:81689911-81691072	0.263978	0.359736
200776_s_at	BZW1	chr3:116645902-116646727	-0.573849	-0.569942
200783_s_at	STMN1	chr1:25884181-25906991	-0.376046	-0.479755
200791_s_at	IQGAP1	chr15:90388242-90502239	0.430851	0.587814
200797_s_at	MCL1	chr1:150560895-150579738	0.547606	0.570407
200813_s_at	PAFAH1B1	chr17:2593210-2685615	-0.426003	-0.739262
200815_s_at	PAFAH1B1	chr17:2593210-2685615	-0.485513	-0.544814
200816_s_at	PAFAH1B1	chr17:2593210-2685615	-0.297051	-0.573544
200820_at	PSMD8	chr19:38374563-38383850	-0.368453	-0.544054
200825_s_at	HYOU1	chr11:119044187-119057226	0.311788	0.339286
200827_at	PLOD1	chr1:11934205-11975538	0.288732	0.425438
200832_s_at	SCD	chr10:100347233-100364826	0.526905	0.689156
200836_s_at	MAP4	chr3:47850690-48089272	0.308264	0.458863
200849_s_at	AHCYL1	chr1:109984765-110023742	0.45689	0.67408
200850_s_at	AHCYL1	chr1:109984765-110023742	0.562456	0.631868
200853_at	H2AZ1	chr4:100869242-100871431	-0.499298	-0.58042
200859_x_at	FLNA	chrX:154348524-154374634	0.32474	0.392398
200864_s_at	RAB11A	chr15:65726054-65891989	-0.336309	-0.408297
200870_at	STRAP	chr12:15882387-15903478	-0.281785	-0.382443
200880_at	DNAJA1	chr9:33025273-33039907	-0.365824	-0.461983
200881_s_at	DNAJA1	chr9:33025273-33039907	-0.429218	-0.598755
200883_at	UQCRC2	chr16:21953288-21983660	-0.52727	-0.739537
200897_s_at	PALLD	chr4:168497052-168928457	0.589542	0.944469
200907_s_at	PALLD	chr4:168497052-168928457	0.710053	0.891294
200915_x_at	KTN1	chr14:55559072-55701526	0.351348	0.511952
200947_s_at	GLUD1	chr10:87050202-87094843	0.436995	0.531676
200954_at	ATP6V0C	chr16:2563870-2570212	-0.33334	-0.364268
200965_s_at	ABLIM1	chr10:114431112-114768061	0.345193	0.39867
200978_at	MDH1	chr2:63588609-63607197	-0.333532	-0.455712
200989_at	HIF1A	chr14:61695513-61748259	0.345397	0.463073
201020_at	YWHAH	chr22:31944522-31957603	-0.412452	-0.665652
201021_s_at	DSTN	chr20:17570075-17609919	-0.597258	-0.571839
201028_s_at	CD99	chrX:2691187-2741309	0.599042	0.7452
201048_x_at	RAB6A	chr11:73675638-73761137	-1.04085	-1.34226
201050_at	PLD3	chr19:40348456-40389472	-0.327935	-0.456712
201054_at	HNRNPA0	chr5:137745651-137754363	-0.38492	-0.570273
201056_at	GOLGB1	chr3:121663199-121749966	0.306272	0.278169
201061_s_at	STOM	chr9:121338987-121370304	0.631025	0.841245
201074_at	SMARCC1	chr3:47585269-47782106	0.286925	0.515947
201075_s_at	SMARCC1	chr3:47585269-47782106	0.376375	0.42088
201078_at	TM9SF2	chr13:99446311-99564048	-0.380578	-0.561764
201087_at	PXN	chr12:120210439-120265771	0.368828	0.407538
201089_at	ATP6V1B2	chr8:20197381-20226819	-0.377156	-0.752285
201091_s_at	CBX3	chr7:26201162-26213607	-0.45589	-0.49294
201096_s_at	ARF4	chr3:57571363-57598220	-0.442799	-0.440623
201120_s_at	PGRMC1	chrX:119236245-119244466	-0.611134	-0.708295
201151_s_at	MBNL1	chr3:152243828-152465780	-0.562233	-0.819969
201154_x_at	RPL4	chr15:66498015-66524532	0.328253	0.347242
201180_s_at	GNAI3	chr1:109548615-109600195	0.390594	0.639514
201184_s_at	CHD4	chr12:6570082-6614524	0.263502	0.387598
201185_at	HTRA1	chr10:122458551-122514907	0.4777	0.613453
201192_s_at	PITPNA	chr17:1517718-1562792	-0.351529	-0.65039
201212_at	LGMN	chr14:92703807-92748679	-0.453186	-0.45733
201219_at	CTBP2	chr10:124984317-125161170	0.363673	0.444386
201237_at	CAPZA2	chr7:116811070-116922049	-0.50665	-1.01681
201238_s_at	CAPZA2	chr7:116811070-116922049	-0.5991	-0.741433
201245_s_at	OTUB1	chr11:63985853-64001811	-0.431546	-0.497424
201254_x_at	RPS6	chr9:19375715-19380236	0.288627	0.453127
201275_at	FDPS	chr1:155308748-155320666	-0.266331	-0.394163
201282_at	OGDH	chr7:44606572-44709066	0.427431	0.393796
201284_s_at	APEH	chr3:49674014-49683971	-0.379228	-0.387147
201302_at	ANXA4	chr2:69644425-69827112	0.537156	0.847295
201304_at	NDUFA5	chr7:123536997-123557904	-0.532974	-0.449653
201305_x_at	ANP32B	chr9:97983341-98015943	0.45153	0.752855
201306_s_at	ANP32B	chr9:97983341-98015943	0.559952	0.910082
201309_x_at	NREP	chr5:111662621-111997464	-1.17164	-1.43254
201317_s_at	PSMA2	chr7:42909273-42932214	-0.275534	-0.280089
201320_at	SMARCC2	chr12:56162359-56189567	0.295197	0.301757
201336_at	VAMP3	chr1:7771296-7781432	0.548029	0.879287
201345_s_at	UBE2D2	chr5:139526431-139628434	-0.39178	-0.344596
201346_at	ADIPOR2	chr12:1688574-1788674	0.468167	0.60959
201364_s_at	OAZ2	chr15:64687573-64703281	-0.341105	-0.29749
201367_s_at	ZFP36L2	chr2:43222402-43226606	0.423398	0.650089
201373_at	PLEC	chr8:143915153-143976734	0.333324	0.401028
201376_s_at	HNRNPF	chr10:43385617-43409186	0.314487	0.439235
201397_at	PHGDH	chr1:119648411-119744218	0.442582	0.479224
201398_s_at	TRAM1	chr8:70573218-70608416	0.533238	0.545085
201413_at	HSD17B4	chr5:119452465-119637199	0.401376	0.479432
201435_s_at	EIF4E	chr4:98879276-98929133	-0.676985	-0.624848
201443_s_at	ATP6AP2	chrX:40579372-40606848	-0.303845	-0.357803
201444_s_at	ATP6AP2	chrX:40579372-40606848	-0.570705	-0.76769
201485_s_at	RCN2	chr15:76931738-76954393	-0.316875	-0.596575
201486_at	RCN2	chr15:76931738-76954393	-0.522337	-0.465323
201502_s_at	NFKBIA	chr14:35401079-35404749	0.759296	0.780137
201512_s_at	TOMM70	chr3:100084138-100119908	-0.851129	-1.09388
201520_s_at	GRSF1	chr4:70815783-70839897	-0.404132	-0.395149
201523_x_at	UBE2N	chr12:93405673-93441947	-0.505139	-0.659426
201532_at	PSMA3	chr14:58244843-58272012	-0.388215	-0.310396
201538_s_at	DUSP3	chr17:43766125-43778977	-0.477406	-0.663471
201553_s_at	LAMP1	chr13:113297239-113323672	0.362902	0.442107
201560_at	CLIC4	chr1:24745382-24844321	0.591758	0.842135
201607_at	PWP1	chr12:107685799-107713162	-0.342514	-0.484618
201613_s_at	AP1G2	chr14:23559565-23568070	0.369037	0.455665
201629_s_at	ACP1	chr2:264140-278283	-0.677556	-0.695439
201630_s_at	ACP1	chr2:264140-278283	-0.315686	-0.40922
201651_s_at	PACSIN2	chr22:42835412-43015149	0.359918	0.505449
201657_at	ARL1	chr12:101393116-101407772	-0.53184	-0.755707
201659_s_at	ARL1	chr12:101393116-101407772	-0.417569	-0.419762
201669_s_at	MARCKS	chr6:113857345-113863475	-0.483731	-0.446958
201674_s_at	AKAP1	chr17:57085092-57121346	0.361151	0.470586
201686_x_at	API5	chrX:116106921-116108430	-0.429736	-0.438464
201688_s_at	TPD52	chr8:80034745-80231232	-0.749831	-0.95441
201689_s_at	TPD52	chr8:80034745-80231232	-0.739074	-0.761004
201691_s_at	TPD52	chr8:80034745-80231232	-0.561286	-0.559057
201705_at	PSMD7	chr16:74296814-74306288	-0.443491	-0.669926
201708_s_at	NIPSNAP1	chr22:29554808-29581327	-0.438944	-0.519946
201712_s_at	RANBP2	chr2:108719482-108785810	-0.403103	-0.557903
201713_s_at	RANBP2	chr2:108719482-108785810	-0.266758	-0.319975
201725_at	CDC123	chr10:12195965-12250589	-0.286483	-0.411935
201739_at	SGK1	chr6:134169248-134318112	0.847714	1.0979
201752_s_at	ADD3	chr10:109996368-110135565	0.696163	0.756036
201753_s_at	ADD3	chr10:109996368-110135565	0.657733	0.935406
201768_s_at	CLINT1	chr5:157785743-157859145	-0.310857	-0.392698
201778_s_at	EFCAB14	chr1:46674659-46719146	0.45259	0.570554
201779_s_at	RNF13	chr3:149812770-149962139	0.582647	0.689214
201795_at	LBR	chr1:225401502-225428925	0.508683	0.628131
201801_s_at	SLC29A1	chr6:44219553-44234142	-0.537817	-0.505291
201820_at	KRT5	chr12:52514575-52520530	-0.300353	-0.364436
201821_s_at	TIMM17A	chr1:201955503-201970664	-1.00314	-1.07307
201823_s_at	RNF14	chr5:141958328-141990292	-0.674843	-0.930161
201824_at	RNF14	chr5:141958328-141990292	-0.309792	-0.310329
201840_at	NEDD8	chr14:24216856-24232366	-0.265593	-0.358569
201841_s_at	HSPB1	chr7:76302673-76304295	0.942409	1.08015
201848_s_at	BNIP3	chr14:28264390-28265974	-0.358452	-0.5395
201866_s_at	NR3C1	chr5:143277931-143435512	-0.405782	-0.575052
201881_s_at	ARIH1	chr15:72474330-72602987	-0.306808	-0.491395
201889_at	FAM3C	chr7:121348878-121396364	-0.496769	-0.746412
201910_at	FARP1	chr13:98142562-98455176	0.280304	0.352695
201924_at	AFF1	chr4:86935002-87141039	0.635502	0.758577
201939_at	PLK2	chr5:58453982-58460139	-0.355042	-0.845972
201946_s_at	CCT2	chr12:69585426-69601570	-0.391702	-0.592817
201976_s_at	MYO10	chr5:16661907-16936288	0.679201	0.828018
201987_at	MED13	chr17:61942605-62065278	0.377845	0.456383
201991_s_at	KIF5B	chr10:32009015-32056425	0.508457	0.76443
201997_s_at	SPEN	chr1:15836095-15940456	0.36782	0.377912
202011_at	TJP1	chr15:29850002-29972346	0.582368	0.559654
202019_s_at	LANCL1	chr2:210427131-210477652	-0.706093	-0.731311
202035_s_at	SFRP1	chr8:41261962-41309473	0.365651	0.44996
202050_s_at	ZMYM4	chr1:35268709-35422058	-0.278974	-0.370061
202058_s_at	KPNA1	chr3:122421902-122514945	-0.346719	-0.469126
202069_s_at	IDH3A	chr15:78131498-78171945	-0.56362	-0.676973
202077_at	NDUFAB1	chr16:23581014-23596316	-0.374058	-0.325166
202085_at	TJP2	chr9:69035747-69255187	0.720319	1.44795
202101_s_at	RALB	chr2:120240064-120294710	-0.442241	-0.636016
202113_s_at	SNX2	chr5:122775079-122834543	-0.44899	-0.541845
202119_s_at	CPNE3	chr8:86514435-86561498	0.507263	0.761478
202123_s_at	ABL1	chr9:130713043-130887675	0.320343	0.407676
202132_at	WWTR1	chr3:149517235-149736714	0.285314	0.462814
202133_at	WWTR1	chr3:149517235-149736714	0.89266	1.21272
202142_at	COPS8	chr2:237085882-237100474	-0.422188	-0.548301
202143_s_at	COPS8	chr2:237085882-237100474	-0.632766	-0.625828
202161_at	PKN1	chr19:14433053-14471867	0.299152	0.448029
202162_s_at	CNOT8	chr5:154857553-154876792	-0.306402	-0.512828
202165_at	PPP1R2	chr5:156850295-156852528	-0.403733	-0.445895
202166_s_at	PPP1R2	chr3:195514428-195543386	-0.729069	-0.623795
202170_s_at	AASDHPPT	chr11:106075501-106098699	-0.519576	-1.06567
202172_at	VEZF1	chr17:57971547-57988259	0.425602	0.49007
202185_at	PLOD3	chr7:101205977-101218420	0.345909	0.477847
202189_x_at	PTBP1	chr19:797075-812327	0.367175	0.414242
202199_s_at	SRPK1	chr6:35832966-35921342	-0.455834	-0.725951
202206_at	ARL4C	chr2:234493041-234497081	-0.51408	-0.850794
202207_at	ARL4C	chr2:234493041-234497081	-0.424698	-1.02372
202213_s_at	CUL4B	chrX:120505920-120604074	-0.412516	-0.640361
202219_at	SLC6A8	chrX:153687926-153696588	0.572187	0.804851
202253_s_at	DNM2	chr19:10718055-10833488	0.467137	0.512214
202283_at	SERPINF1	chr17:1762029-1777565	-0.473813	-0.693915
202330_s_at	UNG	chr12:109097597-109126725	0.490038	0.513637
202346_at	UBE2K	chr4:39698109-39782792	-0.555904	-0.500912
202348_s_at	TOR1A	chr9:129812942-129824244	-0.266433	-0.481803
202364_at	MXI1	chr10:110207605-110287365	0.486081	0.713242
202370_s_at	CBFB	chr16:67028984-67101058	0.797153	0.871202
202374_s_at	RAB3GAP2	chr1:220148293-220272529	-0.424123	-0.654017
202419_at	KDSR	chr18:63327726-63367228	0.375069	0.649424
202427_s_at	MPC2	chr1:167916675-167937072	-0.486623	-0.40822
202453_s_at	GTF2H1	chr11:18322295-18367045	-0.341101	-0.492287
202497_x_at	SLC2A3	chr12:7919230-7936187	-0.303629	-0.360385
202500_at	DNAJB2	chr2:219279342-219286898	0.34391	0.386247
202504_at	TRIM29	chr11:120111286-120185529	-0.506445	-0.420182
202506_at	ITPRID2	chr2:182783586-182795252	0.484342	0.753403
202507_s_at	SNAP25	chr20:10172395-10308258	-0.468008	-0.83696
202511_s_at	ATG5	chr6:106045423-106325791	-0.371193	-0.342915
202516_s_at	DLG1	chr3:197042560-197299330	-0.612508	-0.710147
202524_s_at	SPOCK2	chr10:72059034-72089032	0.317098	0.452899
202538_s_at	CHMP2B	chr3:87227271-87255556	-0.417313	-0.43961
202539_s_at	HMGCR	chr5:75336329-75364001	-0.53917	-0.822761
202555_s_at	MYLK	chr3:123610049-123884332	0.48958	0.628029
202558_s_at	HSPA13	chr21:14371115-14383484	-0.87012	-1.03154
202561_at	TNKS	chr8:9555912-9782346	0.29095	0.416099
202593_s_at	GDE1	chr16:19501693-19522123	-0.353159	-0.52653
202595_s_at	LEPROTL1	chr8:30095408-30177208	-0.371149	-0.639495
202596_at	ENSA	chr1:150600851-150629612	-0.341554	-0.484813
202605_at	GUSB	chr7:65960684-65982215	0.3467	0.434413
202614_at	SLC30A9	chr4:41990502-42090461	-0.390722	-0.523581
202619_s_at	PLOD2	chr3:146035139-146163725	0.65328	0.748163
202623_at	EAPP	chr14:34515938-34539704	-0.28774	-0.369619
202635_s_at	POLR2K	chr8:100150623-100154003	-0.417177	-0.286224
202640_s_at	RANBP3	chr19:5916139-5978142	0.324001	0.395718
202670_at	MAP2K1	chr15:66386837-66491656	-0.346007	-0.464424
202673_at	DPM1	chr20:50934867-50959140	-0.310358	-0.361728
202675_at	SDHB	chr1:17018722-17054032	-0.355788	-0.357187
202679_at	NPC1	chr18:23506184-23586506	0.659725	0.908847
202697_at	NUDT21	chr16:56429133-56452199	-0.556356	-0.571021
202721_s_at	GFPT1	chr2:69319780-69387250	-0.314107	-0.411395
202723_s_at	FOXO1	chr13:40469955-40611127	0.412218	0.49753
202724_s_at	FOXO1	chr13:40555667-40666641	0.55252	0.667501
202736_s_at	LSM4	chr19:18306236-18323112	-0.27784	-0.350488
202742_s_at	PRKACB	chr1:84078062-84238498	-0.547968	-0.897639
202770_s_at	CCNG2	chr4:77157207-77433388	-0.56416	-0.945728
202775_s_at	SFSWAP	chr12:131711081-131799738	0.298458	0.519255
202780_at	OXCT1	chr5:41730065-41870425	-0.341364	-0.364473
202783_at	NNT	chr5:43602692-43707405	-0.34501	-0.484276
202784_s_at	NNT	chr5:43602692-43707405	-0.428018	-0.724669
202823_at	ELOC	chr8:74857849-74884495	-0.61536	-0.544065
202824_s_at	ELOC	chr8:74858846-74872053	-0.4062	-0.269927
202825_at	SLC25A4	chr4:185143266-185150382	-0.38233	-0.646195
202862_at	FAH	chr15:80152490-80186946	0.428084	0.663135
202872_at	ATP6V1C1	chr8:103021063-103073051	-0.65392	-0.56115
202873_at	ATP6V1C1	chr8:103021063-103073051	-0.868126	-1.17505
202874_s_at	ATP6V1C1	chr8:103021063-103073051	-0.693759	-0.714097
202887_s_at	DDIT4	chr10:72273919-72276036	0.80492	1.00525
202915_s_at	FAM20B	chr1:179025804-179076567	-0.315056	-0.405155
202927_at	PIN1	chr19:9835257-9849689	-0.33783	-0.482498
202928_s_at	PHF1	chr6:33550562-33556643	0.264602	0.391915
202930_s_at	SUCLA2	chr13:47745736-48037968	-0.554699	-0.64298
202931_x_at	BIN1	chr2:127048027-127107288	0.339521	0.588321
202949_s_at	FHL2	chr2:105357712-105438513	-0.65226	-0.909334
202951_at	STK38	chr6:36493892-36547479	0.417259	0.619483
202955_s_at	ARFGEF1	chr8:67173511-67343781	-0.371656	-0.518988
202960_s_at	MMUT	chr6:49398998-49430852	0.317539	0.550586
202964_s_at	RFX5	chr1:151340640-151347326	-0.271506	-0.303067
202975_s_at	RHOBTB3	chr5:95713522-95824383	0.740197	1.05676
202976_s_at	RHOBTB3	chr5:95713522-95824383	0.71701	1.10946
203000_at	STMN2	chr8:79611117-79666158	-0.292255	-0.360214
203008_x_at	TXNDC9	chr2:99318982-99340702	-0.40945	-0.477682
203015_s_at	SSX2IP	chr1:84643706-84690803	-0.736562	-1.05049
203017_s_at	SSX2IP	chr1:84643706-84690803	-0.460556	-1.06182
203018_s_at	SSX2IP	chr1:84643706-84690803	-0.449478	-1.14694
203032_s_at	FH	chr1:241497511-241519799	-0.486451	-0.706603
203038_at	PTPRK	chr6:127968779-128524810	0.485215	0.332951
203041_s_at	LAMP2	chrX:120426148-120469365	0.64018	1.09431
203053_at	BCAS2	chr1:114567557-114581629	-0.363569	-0.315196
203068_at	KLHL21	chr1:6590724-6614607	0.400904	0.302578
203071_at	SEMA3B	chr3:50267558-50277546	0.439007	0.690751
203072_at	MYO1E	chr15:59132434-59372871	0.290996	0.446576
203080_s_at	BAZ2B	chr2:159318979-159616569	0.732222	0.851193
203087_s_at	KIF2A	chr5:62306162-62391025	-0.445524	-0.449506
203089_s_at	HTRA2	chr2:74529596-74533350	-0.321825	-0.266346
203094_at	MAD2L1BP	chr6:43629540-43640941	-0.321168	-0.709287
203105_s_at	DNM1L	chr12:32679200-32745650	-0.34171	-0.624011
203112_s_at	NELFA	chr4:1982717-2041903	0.372282	0.369074
203113_s_at	EEF1D	chr8:143579697-143597744	0.368717	0.666577
203117_s_at	PAN2	chr12:56316223-56334053	0.273114	0.464731
203137_at	WTAP	chr6:159725585-159756319	-0.343881	-0.395052
203158_s_at	GLS	chr2:190880821-190965552	-0.776108	-1.28587
203185_at	RASSF2	chr20:4780023-4823608	0.557637	1.01667
203200_s_at	MTRR	chr5:7851186-7906025	0.390005	0.465294
203206_at	FAM53B	chr10:124619292-124744378	0.266007	0.278091
203211_s_at	MTMR2	chr11:95821766-95925315	-0.299141	-0.444422
203215_s_at	MYO6	chr6:75749201-75919537	0.753726	0.904599
203218_at	MAPK9	chr5:180233143-180292099	-0.490587	-0.660197
203225_s_at	RFK	chr9:76385526-76394517	-0.576047	-0.350025
203234_at	UPP1	chr7:48088628-48108736	0.560551	0.463815
203247_s_at	ZNF24	chr18:35332227-35345482	0.329948	0.424626
203254_s_at	TLN1	chr9:35696948-35732195	0.535628	0.830367
203255_at	FBXO11	chr2:47789316-47906498	0.465988	0.677568
203263_s_at	ARHGEF9	chrX:63634967-63809274	-0.668442	-0.842005
203265_s_at	MAP2K4	chr17:12020829-12143830	-0.744942	-1.12492
203291_at	CNOT4	chr7:135361795-135510145	0.312595	0.362266
203302_at	DCK	chr4:70992538-71030914	-0.539434	-0.409137
203333_at	KIFAP3	chr1:169921326-170085208	-0.61775	-0.793786
203351_s_at	ORC4	chr2:147930396-148021604	-0.316418	-0.391324
203352_at	ORC4	chr2:147930396-148021604	-0.337137	-0.447176
203367_at	DUSP14	chr17:37494470-37518136	-0.328362	-0.413572
203375_s_at	TPP2	chr13:102596958-102679958	0.348902	0.442827
203377_s_at	CDC40	chr6:110180141-110254275	-0.437616	-0.936722
203390_s_at	KIF3C	chr2:25926598-25982749	-0.55988	-0.84716
203401_at	PRPS2	chrX:12791355-12824222	-0.548748	-0.619268
203405_at	PSMG1	chr21:39174769-39183488	-0.553343	-0.414357
203413_at	NELL2	chr12:44508275-44921848	-0.411046	-0.641923
203415_at	PDCD6	chr5:218298-314955	-0.277205	-0.281925
203430_at	HEBP2	chr6:138403531-138422197	0.54427	0.714364
203482_at	SLF2	chr10:100912963-100965134	0.594799	0.702228
203484_at	SEC61G	chr7:54752250-54759974	-0.310165	-0.400446
203511_s_at	TRAPPC3	chr1:36136570-36156053	-0.325248	-0.383493
203513_at	SPG11	chr15:44554818-44663688	0.32099	0.519788
203520_s_at	ZNF318	chr6:43307134-43369647	-0.269235	-0.358093
203540_at	GFAP	chr17:44903159-44916937	0.900947	1.12542
203544_s_at	STAM	chr10:17644151-17716824	-0.393962	-0.402811
203556_at	ZHX2	chr8:122781655-122974510	0.558113	0.763254
203560_at	GGH	chr8:63014881-63039407	-0.522413	-0.578786
203594_at	RTCA	chr1:100266216-100292769	-0.449638	-0.434296
203600_s_at	FAM193A	chr4:2536647-2732573	0.403162	0.343703
203620_s_at	FCHSD2	chr11:72836745-73142318	0.290203	0.556705
203622_s_at	PNO1	chr2:68157888-68176238	-0.31952	-0.489496
203631_s_at	GPRC5B	chr16:19856691-19886167	0.553992	0.632479
203632_s_at	GPRC5B	chr16:19856691-19886167	0.702092	0.901721
203633_at	CPT1A	chr11:68754620-68844410	0.389935	0.410227
203663_s_at	COX5A	chr15:74919791-74938083	-0.423239	-0.34465
203674_at	HELZ	chr17:67070444-67245989	0.37573	0.398993
203683_s_at	VEGFB	chr11:64234584-64239264	0.359285	0.586612
203685_at	BCL2	chr18:63123346-63320128	0.686761	0.638589
203706_s_at	FZD7	chr2:202033855-202038441	0.730226	0.840998
203723_at	ITPKB	chr1:226631690-226739323	1.00699	1.10868
203739_at	ZNF217	chr20:53567071-53609907	0.449449	0.665713
203759_at	ST3GAL4	chr11:126355640-126440344	0.268829	0.391209
203767_s_at	STS	chrX:7147237-7804358	-0.694581	-0.857302
203768_s_at	STS	chrX:7147237-7804358	-0.598143	-0.564313
203794_at	CDC42BPA	chr1:226989865-227318492	0.351279	0.349407
203798_s_at	VSNL1	chr2:17539126-17657018	-0.731916	-1.16541
203836_s_at	MAP3K5	chr6:136557046-136793097	0.368577	0.489137
203843_at	RPS6KA3	chrX:20149911-20267519	-0.483838	-0.408829
203846_at	TRIM32	chr9:116687305-116701300	-0.363831	-0.691293
203853_s_at	GAB2	chr11:78215293-78418348	0.309703	0.606999
203854_at	CFI	chr4:109731008-109802150	0.42266	0.51211
203864_s_at	ACTN2	chr1:236664141-236764631	-0.353871	-0.426883
203869_at	USP46	chr4:52590960-52659301	-0.428775	-0.478225
203889_at	SCG5	chr15:32721966-32777405	-0.294808	-0.382848
203890_s_at	DAPK3	chr19:3958453-3971123	-0.42457	-0.625768
203946_s_at	ARG2	chr14:67619920-67651708	-0.635837	-0.76184
203961_at	NEBL	chr10:20779973-21293011	0.624066	0.736472
204020_at	PURA	chr5:140107777-140125619	0.372051	0.468481
204021_s_at	PURA	chr5:140107777-140125619	0.533687	0.684776
204036_at	LPAR1	chr9:110873263-111038470	0.754559	1.46248
204037_at	LPAR1	chr9:110873263-111038470	0.594283	0.96388
204041_at	MAOB	chrX:43766610-43882450	0.365442	0.515508
204045_at	TCEAL1	chrX:103628704-103630953	-0.309596	-0.323249
204062_s_at	ULK2	chr17:19770829-19867936	-0.40176	-0.497379
204068_at	STK3	chr8:98371228-98942827	0.490396	0.609296
204097_s_at	RBMX2	chrX:130401987-130413656	0.283837	0.434431
204114_at	NID2	chr14:52004809-52069059	-0.29685	-0.359176
204127_at	RFC3	chr13:33818069-33966558	-0.667333	-0.446618
204163_at	EMILIN1	chr2:27078615-27086403	0.350672	0.463958
204185_x_at	PPID	chr4:158709127-158723396	-0.404577	-0.501422
204186_s_at	PPID	chr4:158709127-158723396	-0.48632	-0.659488
204187_at	GMPR	chr6:16238587-16295549	0.569144	0.790214
204207_s_at	RNGTT	chr6:88609897-88963618	-0.530553	-0.542194
204230_s_at	SLC17A7	chr19:49429401-49442360	-0.455287	-0.587348
204246_s_at	DCTN3	chr9:34613545-34620523	-0.410373	-0.471323
204260_at	CHGB	chr20:5911510-5925353	-0.52747	-0.730471
204326_x_at	MT1X	chr16:56682470-56684196	1.0037	1.18076
204338_s_at	RGS4	chr1:163068775-163076802	-1.53299	-2.5684
204339_s_at	RGS4	chr1:163068775-163076802	-0.723537	-1.6543
204344_s_at	SEC23A	chr14:39031919-39109646	-0.455046	-0.740361
204345_at	COL16A1	chr1:31652263-31704319	0.321989	0.480668
204378_at	BCAS1	chr20:53936777-54070594	0.548314	0.799256
204417_at	GALC	chr14:87837820-87993665	0.343708	0.450355
204426_at	TMED2	chr12:123584533-123598582	-0.458106	-0.589351
204428_s_at	LCAT	chr16:67939750-67944131	0.370695	0.509993
204466_s_at	SNCA	chr4:89700345-89838315	-0.435464	-0.653986
204472_at	GEM	chr8:94249253-94262350	0.743942	0.94913
204478_s_at	RABIF	chr1:202878282-202889149	-0.355232	-0.397738
204511_at	FARP2	chr2:241356285-241494841	0.286322	0.270451
204519_s_at	PLLP	chr16:57248547-57284672	0.573496	0.932874
204525_at	PHF14	chr7:10973336-11169623	-0.544476	-0.48193
204552_at	INPP4A	chr2:98444854-98594392	-0.505132	-0.933399
204560_at	FKBP5	chr6:35573585-35728583	0.81092	0.890048
204591_at	CHL1	chr3:196763-409417	-0.417066	-0.723739
204620_s_at	VCAN	chr5:83471618-83582303	0.543967	0.844289
204630_s_at	GOSR1	chr17:30477362-30527592	0.412552	0.545838
204641_at	NEK2	chr1:211658657-211675630	-0.640789	-0.539418
204675_at	SRD5A1	chr5:6633427-6674386	-0.597791	-0.507037
204678_s_at	KCNK1	chr1:233614106-233672514	-0.695597	-1.24634
204679_at	KCNK1	chr1:233614106-233672514	-0.501039	-0.810691
204723_at	SCN3B	chr11:123629187-123655244	-0.462973	-0.604449
204726_at	CDH13	chr16:82660632-83830197	-0.515751	-0.795099
204729_s_at	STX1A	chr7:73699206-73719672	-0.389953	-0.593384
204736_s_at	CSPG4	chr15:75674322-75712848	0.347714	0.42776
204755_x_at	HLF	chr17:55264960-55325187	-0.512762	-1.2529
204768_s_at	FEN1	chr11:61792911-61797238	-0.341265	-0.541458
204771_s_at	TTF1	chr9:132375548-132406851	0.373213	0.345005
204796_at	EML1	chr14:99737693-99942060	-0.327937	-0.398427
204906_at	RPS6KA2	chr6:166409364-166906451	0.391548	0.409179
204943_at	ADAM12	chr10:126012381-126388477	-0.345284	-0.455445
204945_at	PTPRN	chr2:219289623-219309648	-0.368681	-0.548971
204989_s_at	ITGB4	chr17:75721328-75757818	0.449746	0.654547
204990_s_at	ITGB4	chr17:75721328-75757818	0.474644	0.752939
204995_at	CDK5R1	chr17:32486993-32491253	-0.299485	-0.414779
205031_at	EFNB3	chr17:7705202-7711372	-0.574776	-0.691687
205060_at	PARG	chr10:49818279-49970203	-0.321458	-0.374719
205074_at	SLC22A5	chr5:132369710-132395613	0.371407	0.481124
205084_at	BCAP29	chr7:107580906-107618493	-0.712826	-0.594387
205104_at	SNPH	chr20:1266280-1309328	0.263709	0.319795
205111_s_at	PLCE1	chr10:93993931-94332823	0.424952	0.640062
205117_at	FGF1	chr5:142592178-142698070	0.622984	1.25246
205148_s_at	CLCN4	chrX:10156975-10237660	-0.344156	-0.575336
205149_s_at	CLCN4	chrX:10156975-10237660	-0.620037	-0.666717
205178_s_at	RBBP6	chr16:24537693-24572863	0.335787	0.572671
205202_at	PCMT1	chr6:149749444-149811420	-0.42286	-0.677575
205218_at	POLR3F	chr20:18466878-18484648	-0.379552	-0.454854
205248_at	DOP1B	chr21:37536838-37666175	-0.298388	-0.606182
205249_at	EGR2	chr10:64571756-64576127	-0.470114	-0.653941
205268_s_at	ADD2	chr2:70607618-70768225	-0.612307	-0.756735
205279_s_at	GLRB	chr4:157076125-157172090	-0.740162	-1.03396
205280_at	GLRB	chr4:157076125-157172090	-0.695817	-0.769597
205281_s_at	PIGA	chrX:15319452-15335554	0.379169	0.606068
205352_at	SERPINI1	chr3:167735243-167825569	-0.405681	-0.512604
205383_s_at	ZBTB20	chr3:114314500-115147292	0.614973	0.699104
205406_s_at	SPA17	chr11:124673844-124697518	-0.352408	-0.457093
205485_at	RYR1	chr19:38433691-38595273	0.752291	1.00613
205489_at	CRYM	chr16:21238874-21303083	-0.480519	-0.646802
205513_at	TCN1	chr11:59852800-59866489	-0.301756	-0.34335
205568_at	AQP9	chr15:58138169-58185911	-0.443217	-0.526789
205591_at	OLFM1	chr9:135075422-135121180	-0.526093	-0.545515
205625_s_at	CALB1	chr8:90058608-90095475	-1.51905	-1.44836
205626_s_at	CALB1	chr8:90058608-90095475	-1.50595	-1.51857
205630_at	CRH	chr8:66176376-66178464	-1.17482	-1.38543
205632_s_at	PIP5K1B	chr9:68705240-69009176	-0.434149	-0.536902
205635_at	KALRN	chr3:124033369-124726325	-0.434443	-0.746033
205749_at	CYP1A1	chr15:74719542-74725536	-0.282041	-0.487217
205760_s_at	OGG1	chr3:9749944-9788219	0.287588	0.344031
205803_s_at	TRPC1	chr3:142724034-142807888	-0.339193	-0.515657
205806_at	ROM1	chr11:62611722-62615116	0.287797	0.447106
205810_s_at	WASL	chr7:123681943-123749003	-0.368264	-0.456438
205827_at	CCK	chr3:42257825-42266185	-0.582379	-0.583711
205850_s_at	GABRB3	chr15:26543552-26939539	-0.733883	-1.21951
205854_at	TULP3	chr12:2877223-2941138	0.30471	0.51491
205874_at	ITPKA	chr15:41493393-41503551	-0.370824	-0.541149
205882_x_at	ADD3	chr10:109996368-110135565	0.675531	0.737345
205883_at	ZBTB16	chr11:114059041-114256765	0.552874	0.440251
205899_at	CCNA1	chr13:36431520-36442870	-0.49946	-0.51003
205902_at	KCNN3	chr1:154697455-154870281	0.788337	1.02659
205938_at	PPM1E	chr17:58755854-58985179	-0.75593	-0.958782
206023_at	NMU	chr4:55595229-55636698	-0.736975	-0.569863
206046_at	ADAM23	chr2:206443532-206621127	-0.39801	-0.560176
206062_at	GUCA1A	chr6:42155406-42180056	-0.409556	-0.391811
206072_at	UCN	chr2:27307400-27308445	0.276222	0.378829
206075_s_at	CSNK2A1	chr20:472498-543835	-0.32744	-0.442698
206089_at	NELL1	chr11:20669551-21575686	-0.430251	-0.642327
206113_s_at	RAB5A	chr3:19947097-19985175	-0.481241	-0.438146
206115_at	EGR3	chr8:22687659-22693480	-0.602602	-1.01941
206191_at	ENTPD3	chr3:40387184-40428744	-0.425369	-0.54974
206208_at	CA4	chr17:60149942-60170899	-0.375144	-0.75449
206209_s_at	CA4	chr17:60149942-60170899	-0.637478	-0.946021
206232_s_at	B4GALT6	chr18:31622246-31685836	-0.650151	-0.842651
206233_at	B4GALT6	chr18:31622246-31685836	-0.752808	-0.80962
206235_at	LIG4	chr13:108207439-108218368	-0.406508	-0.546482
206238_s_at	YAF2	chr12:42157104-42238349	-0.366688	-0.378384
206290_s_at	RGS7	chr1:240767636-241357374	-0.313625	-0.431741
206356_s_at	GNAL	chr18:11689264-11885685	-0.620446	-0.629359
206376_at	SLC6A15	chr12:84859491-84913629	-0.621096	-0.96209
206383_s_at	G3BP2	chr4:75641849-75724589	-0.623753	-1.09089
206461_x_at	MT1H	chr16:56669814-56671129	0.742091	0.840351
206468_s_at	METTL13	chr1:171781660-171814023	-0.314422	-0.475431
206471_s_at	PLXNC1	chr12:94148577-94307675	-0.393146	-0.437825
206473_at	MBTPS2	chrX:21839617-21885423	-0.286551	-0.452166
206474_at	CDK17	chr12:96278261-96400480	-0.763757	-0.830353
206489_s_at	DLGAP1	chr18:3496032-4455307	-0.433113	-0.533678
206534_at	GRIN2A	chr16:9753404-10182928	-0.658687	-1.28882
206542_s_at	SMARCA2	chr9:1980290-2193624	-0.324258	-0.425342
206544_x_at	SMARCA2	chr9:1980290-2193624	-0.376705	-0.717061
206577_at	VIP	chr6:152750797-152759765	-1.18799	-1.01184
206667_s_at	SCAMP1	chr5:78360611-78480739	-0.76904	-1.49103
206670_s_at	GAD1	chr2:170813213-170861151	-0.909688	-1.19149
206686_at	PDK1	chr2:172555373-172608669	-0.272651	-0.372916
206695_x_at	ZNF43	chr19:21814429-21818511	-0.318522	-0.357619
206731_at	CNKSR2	chrX:21372801-21654695	-0.588648	-0.865828
206745_at	HOXC11	chr12:53973126-53977643	-0.287891	-0.373041
206782_s_at	DNAJC4	chr11:64230278-64234286	0.293807	0.344364
206811_at	ADCY8	chr8:130780301-131040909	0.322239	0.400794
206849_at	GABRG2	chr5:162000057-162162977	-0.978648	-1.54254
206855_s_at	HYAL2	chr3:50317790-50322782	0.271314	0.40949
206861_s_at	CGGBP1	chr3:88051944-88149885	-0.308981	-0.43007
206898_at	CDH19	chr18:66501083-66604138	0.734588	1.18993
206900_x_at	ZNF253	chr19:19865882-19894674	-0.331163	-0.322952
206935_at	PCDH8	chr13:52842889-52848641	-0.814562	-0.847325
206949_s_at	RUSC1	chr1:155320894-155331114	-0.275985	-0.416571
206984_s_at	RIT2	chr18:42743227-43115691	-0.711347	-0.737119
206989_s_at	SCAF11	chr12:45919131-45992120	0.494005	0.574173
207035_at	SLC30A3	chr2:27253684-27275817	-0.369426	-0.677606
207044_at	THRB	chr3:24117153-24495756	-0.289148	-0.60785
207049_at	SCN8A	chr12:51590266-51812864	-0.488	-0.833499
207050_at	CACNA2D1	chr7:81946444-82443956	-0.665449	-0.593621
207081_s_at	PI4KA	chr22:21473000-21517533	-0.32818	-0.755555
207103_at	KCND2	chr7:120273175-120750337	-0.504045	-0.708499
207124_s_at	GNB5	chr15:52115100-52191392	-0.499323	-0.894056
207141_s_at	KCNJ3	chr2:154697855-154858354	-0.909267	-0.988865
207142_at	KCNJ3	chr2:154697855-154858354	-0.618681	-0.895736
207152_at	NTRK2	chr9:84668375-85095751	-0.487885	-0.846869
207186_s_at	BPTF	chr17:64761912-64762710	0.449241	0.603018
207268_x_at	ABI2	chr2:203328280-203447728	-0.359235	-0.490412
207318_s_at	CDK13	chr7:39950121-40099580	0.422113	0.435673
207400_at	NPY5R	chr4:163343892-163351934	-0.495216	-0.551935
207405_s_at	RAD17	chr5:69369307-69415042	-0.307541	-0.434334
207431_s_at	DEGS1	chr1:224175756-224193441	-0.368889	-0.381689
207483_s_at	CAND1	chr12:67269358-67319953	-0.464709	-0.463967
207501_s_at	FGF12	chr3:192139390-192767764	-0.664916	-0.871253
207507_s_at	ATP5MC3	chr2:176042872-176046362	-0.441156	-0.51065
207508_at	ATP5MC3	chr2:176042872-176046362	-0.389941	-0.371443
207527_at	KCNJ9	chr1:160081538-160090563	-0.460671	-0.990642
207547_s_at	FAM107A	chr3:58564117-58627610	0.833623	1.14322
207557_s_at	RYR2	chr1:237042184-237833988	0.466257	0.581622
207594_s_at	SYNJ1	chr21:32628759-32728040	-1.12369	-1.49218
207627_s_at	TFCP2	chr12:51093656-51173135	-0.367137	-0.393833
207648_at	DRP2	chrX:101219769-101264502	-0.437587	-0.586148
207654_x_at	DR1	chr1:93345907-93369493	-0.466252	-0.395324
207657_x_at	TNPO1	chr5:72816312-72916733	0.43196	0.497957
207671_s_at	BEST1	chr11:61950063-61965515	0.33309	0.676111
207704_s_at	GAS7	chr17:9910606-10198606	-0.569309	-0.861385
207721_x_at	HINT1	chr5:131155383-131224468	-0.348367	-0.305609
207732_s_at	DLG3	chrX:70444835-70505490	-0.478261	-0.519714
207738_s_at	NCKAP1	chr2:182909115-183038858	-0.514423	-0.646913
207760_s_at	NCOR2	chr12:124324415-124567612	0.366786	0.325924
207772_s_at	PRMT8	chr12:3381349-3593973	-0.538974	-0.891043
207776_s_at	CACNB2	chr10:18140424-18543557	-0.510289	-1.00352
207781_s_at	ZNF711	chrX:85243991-85273362	-0.693835	-0.805501
207791_s_at	RAB1A	chr2:65070696-65130331	-0.73619	-0.818676
207842_s_at	CASC3	chr17:40140318-40172171	0.367852	0.54682
207880_at	ADAM11	chr17:44758988-44781846	-0.333949	-0.444341
207940_x_at	CNR1	chr6:88139864-88166347	-0.29887	-0.450338
207956_x_at	PDS5B	chr13:32586452-32778019	-0.282318	-0.473504
207957_s_at	PRKCB	chr16:23835983-24220611	-0.500414	-0.993531
207966_s_at	GLG1	chr16:74447427-74607144	0.344529	0.410271
207968_s_at	MEF2C	chr5:88717117-88904257	-0.736739	-1.55132
207974_s_at	SKP1	chr5:134148935-134176964	-0.586112	-0.580637
207980_s_at	CITED2	chr6:139371807-139374648	-0.925317	-1.44888
207996_s_at	LDLRAD4	chr18:13217498-13652755	-0.419443	-0.533991
208013_s_at	ACRV1	chr11:125671522-125680874	-0.299814	-0.282118
208035_at	GRM6	chr5:178977587-178996206	-0.265608	-0.546768
208092_s_at	CYRIA	chr2:16733900-16805288	-0.811377	-1.16872
208104_s_at	TSC22D4	chr7:100463359-100479232	0.38695	0.6744
208116_s_at	MAN1A1	chr6:119177205-119349761	-0.588552	-0.679064
208121_s_at	PTPRO	chr12:15322257-15602175	-0.493789	-0.71685
208124_s_at	SEMA4F	chr2:74654228-74683853	-0.401214	-0.432481
208132_x_at	PRRC2A	chr6:31602891-31619942	0.271808	0.490634
208213_s_at	KCNAB1	chr3:156037701-156539138	-0.455273	-0.626439
208243_s_at	CNR1	chr6:88139864-88166347	-0.319609	-0.469903
208290_s_at	EIF5	chr14:103333544-103345025	-0.533439	-0.747447
208316_s_at	OCRL	chrX:129539849-129592561	-0.360474	-0.545203
208351_s_at	MAPK1	chr22:21759657-21867680	-0.689218	-0.977644
208424_s_at	CIAPIN1	chr16:57428187-57447420	-0.374587	-0.410808
208425_s_at	TANC2	chr17:62966235-63427703	-0.514714	-0.788859
208447_s_at	PRPS1	chrX:107628428-107651993	-0.686044	-0.748559
208461_at	HIC1	chr17:2054154-2063241	0.302719	0.416704
208463_at	GABRA4	chr4:46918900-46993581	-0.383943	-0.380266
208524_at	GPR15	chr3:98531978-98534681	-0.293114	-0.329482
208532_x_at	KRTAP5-8	chr11:71538025-71539209	-0.380947	-0.356066
208581_x_at	MT1X	chr16:56682470-56684196	0.938968	1.01796
208616_s_at	PTP4A2	chr1:31906421-31944856	0.293164	0.599798
208669_s_at	EID1	chr15:48878134-48880173	-0.328166	-0.309586
208683_at	CAPN2	chr1:223701593-223776018	0.547405	0.690073
208687_x_at	HSPA8	chr11:123057489-123063230	-0.407779	-0.561846
208702_x_at	APLP2	chr11:130068147-130144811	-0.312426	-0.62288
208708_x_at	EIF5	chr14:103333544-103345025	-0.365587	-0.541015
208724_s_at	RAB1A	chr2:65070696-65130331	-0.273238	-0.287902
208734_x_at	RAB2A	chr8:60516936-60623644	-0.344643	-0.624991
208748_s_at	FLOT1	chr6:30717229-30732250	-0.565273	-0.489668
208761_s_at	SUMO1	chr2:202206182-202238599	-0.348704	-0.600024
208767_s_at	LAPTM4B	chr8:97775057-97853013	-0.421233	-0.456284
208781_x_at	SNX3	chr6:108533043-108582145	-0.413716	-0.333656
208785_s_at	MAP1LC3B	chr12:116548105-116576606	-0.376651	-0.378017
208800_at	SRP72	chr4:56467617-56503681	-0.759495	-0.630981
208813_at	GOT1	chr10:99396870-99430624	-0.490211	-0.705105
208821_at	SNRPB	chr20:2461634-2470853	-0.374194	-0.399986
208826_x_at	HINT1	chr5:131155383-131224468	-0.376702	-0.333818
208828_at	POLE3	chr9:113407235-113410675	-0.542911	-0.531568
208832_at	ATXN10	chr22:45671798-45845307	-0.29993	-0.389752
208833_s_at	ATXN10	chr22:45671798-45845307	-0.358404	-0.337015
208835_s_at	LUC7L3	chr17:50719565-50756219	0.79001	1.15502
208837_at	TMED3	chr15:79311112-79427432	-0.388557	-0.478665
208838_at	CAND1	chr12:67269358-67319953	-0.415528	-0.473261
208839_s_at	CAND1	chr12:67269358-67319953	-0.35385	-0.388449
208840_s_at	G3BP2	chr4:75641849-75724589	-0.882925	-1.32912
208841_s_at	G3BP2	chr4:75641849-75724589	-0.494133	-0.675016
208857_s_at	PCMT1	chr6:149749444-149811420	-0.676742	-0.904071
208868_s_at	GABARAPL1	chr12:10212458-10223128	-0.795364	-0.819852
208869_s_at	GABARAPL1	chr12:10212458-10223128	-0.489533	-0.471134
208872_s_at	REEP5	chr5:112876385-112922289	-0.734074	-0.919704
208877_at	PAK2	chr3:196739857-196832647	0.490595	0.564205
208890_s_at	PLXNB2	chr22:50274979-50307646	0.30879	0.524337
208899_x_at	ATP6V1D	chr14:67294371-67360265	-0.282865	-0.411375
208909_at	UQCRFS1	chr19:29205320-29213151	-0.479636	-0.459808
208910_s_at	C1QBP	chr17:5432777-5448830	-0.283644	-0.334256
208911_s_at	PDHB	chr3:58427630-58433857	-0.43321	-0.529188
208922_s_at	NXF1	chr11:62792123-62806302	0.266651	0.327349
208924_at	RNF11	chr1:51236273-51273447	-0.452328	-0.421771
208946_s_at	BECN1	chr17:42810134-42833350	-0.516742	-0.57783
208968_s_at	CIAPIN1	chr16:57428187-57447420	-0.270639	-0.376694
209022_at	STAG2	chrX:123960212-124422664	0.493599	0.598339
209028_s_at	ABI1	chr10:26746593-26861087	-0.312083	-0.34016
209031_at	CADM1	chr11:115169218-115504957	0.334834	0.563104
209036_s_at	MDH2	chr7:76048051-76067508	-0.381936	-0.441108
209050_s_at	RALGDS	chr9:133097720-133149334	0.447872	0.767315
209055_s_at	CDC5L	chr6:44387706-44450425	-0.427938	-0.424673
209057_x_at	CDC5L	chr6:44387706-44450425	-0.464507	-0.487021
209074_s_at	FAM107A	chr3:58564117-58627610	0.665788	0.762862
209080_x_at	GLRX3	chr10:130136391-130184521	-0.394469	-0.380681
209092_s_at	GLOD4	chr17:757097-782294	-0.278569	-0.362687
209095_at	DLD	chr7:107891162-107931730	-0.463954	-0.512776
209096_at	UBE2V2	chr8:48008415-48064708	-0.554637	-0.723767
209102_s_at	HBP1	chr7:107168961-107202522	0.361744	0.423271
209105_at	NCOA1	chr2:24491254-24770702	-0.300072	-0.41816
209123_at	QDPR	chr4:17460261-17512206	0.479134	0.697457
209130_at	SNAP23	chr15:42491233-42545356	0.652276	0.805049
209153_s_at	TCF3	chr19:1609291-1652615	0.280851	0.376285
209157_at	DNAJA2	chr16:46955362-46973674	-0.273257	-0.457305
209158_s_at	CYTH2	chr19:48469208-48482314	-0.298058	-0.364997
209184_s_at	IRS2	chr13:109752695-109786583	0.359125	0.513229
209199_s_at	MEF2C	chr5:88717117-88904257	-0.478906	-0.93078
209208_at	MPDU1	chr17:7583529-7592789	-0.272681	-0.32206
209225_x_at	TNPO1	chr5:72816312-72916733	0.592731	0.555056
209227_at	TUSC3	chr8:15417215-15766649	-0.571008	-0.623503
209228_x_at	TUSC3	chr8:15417215-15766649	-0.735398	-0.720511
209230_s_at	NUPR1	chr16:28532708-28539008	0.596683	0.757247
209249_s_at	GHITM	chr10:84139482-84154841	-0.346633	-0.452454
209272_at	NAB1	chr2:190646746-190692766	0.367644	0.356743
209273_s_at	ISCA1	chr5:62776877-62777263	-0.452236	-0.707575
209274_s_at	ISCA1	chr9:86264546-86283102	-0.387016	-0.571024
209279_s_at	NSDHL	chrX:152830967-152869729	-0.277782	-0.296889
209283_at	CRYAB	chr11:111908564-111923722	0.846168	1.29166
209285_s_at	TASOR	chr3:56654160-56698359	0.414707	0.576193
209286_at	CDC42EP3	chr2:37641882-37738468	-0.491683	-0.588566
209300_s_at	NECAP1	chr12:8076939-8097881	-0.355927	-0.538904
209303_at	NDUFS4	chr5:53560633-53683338	-0.465904	-0.529434
209307_at	SWAP70	chr11:9664077-9752993	0.723112	0.817909
209339_at	SIAH2	chr3:150741125-150763477	-0.32315	-0.568048
209343_at	EFHD1	chr2:232606057-232682776	0.669965	1.09943
209357_at	CITED2	chr6:139371807-139374648	-0.675151	-1.19923
209361_s_at	PCBP4	chr3:51957454-51974016	0.310115	0.515598
209363_s_at	MED21	chr12:27022546-27066343	-0.590828	-0.60295
209377_s_at	HMGN3	chr6:79201245-79234689	0.356778	0.45851
209431_s_at	PATZ1	chr22:31325804-31346346	0.425892	0.48083
209456_s_at	FBXW11	chr5:171861549-172006873	-0.616731	-0.7767
209484_s_at	NSL1	chr1:212726153-212791782	0.374657	0.415813
209504_s_at	PLEKHB1	chr11:73646178-73662819	0.707093	1.02508
209506_s_at	NR2F1	chr5:93583222-93594611	0.300469	0.287904
209507_at	RPA3	chr7:7636518-7718607	-0.326616	-0.373716
209515_s_at	RAB27A	chr15:55202966-55319113	0.325396	0.412704
209539_at	ARHGEF6	chrX:136665547-136780932	0.472188	0.571027
209541_at	IGF1	chr12:102395874-102481744	-0.649241	-0.706299
209550_at	NDN	chr15:23685400-23687305	-0.395254	-0.5095
209558_s_at	HIP1R	chr12:122834453-122862961	0.367166	0.71018
209569_x_at	NSG1	chr4:4348140-4419058	-0.537888	-1.05825
209576_at	GNAI1	chr7:79768028-80226181	-0.60513	-0.639079
209581_at	PLAAT3	chr11:63342283-63381841	0.530163	0.77024
209582_s_at	CD200	chr3:112332347-112362812	-0.636349	-0.94846
209583_s_at	CD200	chr3:112332347-112362812	-0.423758	-0.378846
209608_s_at	ACAT2	chr6:159762045-159779112	-0.54854	-0.45912
209615_s_at	PAK1	chr11:77322017-77474635	-1.06367	-1.28418
209630_s_at	FBXW2	chr9:120751978-120793416	-0.312627	-0.330389
209636_at	NFKB2	chr10:102394110-102402524	0.32429	0.500971
209677_at	PRKCI	chr3:170222424-170305977	-0.46066	-0.705521
209697_at	PPP3CC	chr8:22298594-22398638	0.364508	0.486812
209741_x_at	SCAPER	chr15:76347904-76905444	-0.265975	-0.313668
209747_at	TGFB3	chr14:75958097-75983011	0.341612	0.557391
209786_at	HMGN4	chr6:26538366-26546933	-0.382301	-0.445168
209791_at	PADI2	chr1:17066761-17119451	0.611072	0.71922
209822_s_at	VLDLR	chr9:2621182-2660056	-0.466054	-0.594009
209849_s_at	RAD51C	chr17:58692573-58735611	-0.391836	-0.455063
209856_x_at	ABI2	chr2:203328280-203447728	-0.438712	-0.493867
209869_at	ADRA2A	chr10:111077029-111080907	-0.608488	-0.667891
209907_s_at	ITSN2	chr2:24202864-24360536	0.292951	0.42071
209915_s_at	NRXN1	chr2:49918503-51225575	-0.652545	-1.07628
209944_at	ZNF410	chr14:73851971-73932278	0.283704	0.382042
209987_s_at	ASCL1	chr12:102957674-102960513	0.652565	1.24669
209988_s_at	ASCL1	chr12:102957674-102960513	0.709928	1.03689
210015_s_at	MAP2	chr2:209424047-209734147	-0.807298	-0.945418
210024_s_at	UBE2E3	chrX:14244382-14244928	-0.320842	-0.403762
210079_x_at	KCNAB1	chr3:156037701-156539138	-0.439197	-0.572642
210104_at	MED6	chr14:70581257-70600690	-0.41845	-0.492366
210105_s_at	FYN	chr6:111660332-111873452	0.323516	0.33775
210155_at	MYOC	chr1:171635417-171652688	-0.359501	-0.448307
210156_s_at	PCMT1	chr6:149749444-149811420	-0.764747	-1.1389
210182_at	CORT	chr1:10430102-10452153	-0.328735	-0.416098
210201_x_at	BIN1	chr2:127048027-127107288	0.39941	0.58391
210202_s_at	BIN1	chr2:127048027-127107288	0.357296	0.480557
210222_s_at	RTN1	chr14:59595976-59870776	-0.369433	-0.524243
210232_at	CDC42	chr1:22025142-22092943	-0.702111	-0.936941
210250_x_at	ADSL	chr22:40346529-40410054	-0.300604	-0.436647
210270_at	RGS6	chr14:71932429-72566530	-0.289853	-0.567811
210277_at	AP4S1	chr14:31025106-31130996	-0.55999	-0.456094
210278_s_at	AP4S1	chr14:31025106-31130996	-0.763956	-0.765898
210285_x_at	WTAP	chr6:51410081-51410537	-0.572971	-0.550181
210312_s_at	IFT20	chr17:28328325-28335489	0.286763	0.57015
210315_at	SYN2	chr3:12004388-12192032	-0.974418	-1.5875
210338_s_at	HSPA8	chr11:123057489-123063230	-0.49661	-0.830264
210349_at	CAMK4	chr5:111223653-111494886	-0.527261	-0.465116
210355_at	PTHLH	chr12:27958084-27972733	-0.3377	-0.318268
210448_s_at	P2RX5	chr17:3672199-3696240	-0.277312	-0.390696
210465_s_at	SNAPC3	chr9:15422734-15465953	-0.502556	-0.520379
210518_at	CDH8	chr16:61647242-62037035	-0.357677	-0.693634
210570_x_at	MAPK9	chr5:180233143-180292099	-0.680874	-0.871156
210573_s_at	POLR3C	chr1:145824053-145844402	-0.316767	-0.41208
210621_s_at	RASA1	chr5:87267883-87391931	-0.431493	-0.548368
210639_s_at	ATG5	chr6:106045423-106325791	-0.616771	-0.851451
210657_s_at	SEPTIN4	chr17:56597616-56609395	0.702847	1.04664
210671_x_at	MAPK8	chr10:48306639-48439360	-0.531975	-0.422892
210675_s_at	PTPRR	chr12:70638073-70920738	-0.683669	-0.695558
210681_s_at	USP15	chr12:62260338-62417431	-0.407563	-0.343168
210691_s_at	CACYBP	chr2:183607442-183608119	-0.417175	-0.702458
210711_at	LINC00260	chr1:203699704-203700977	0.265523	0.326887
210719_s_at	HMG20B	chr19:3572777-3579088	0.467014	0.728283
210740_s_at	ITPK1	chr14:92936914-93116320	0.307755	0.348418
210779_x_at	GEMIN2	chr14:39114285-39136973	-0.313876	-0.348024
210787_s_at	CAMKK2	chr12:121237675-121298308	-0.93778	-1.49374
210817_s_at	CALCOCO2	chr17:48831018-48866522	0.332282	0.441057
210826_x_at	RAD17	chr5:69369307-69415042	-0.321698	-0.427358
210829_s_at	SSBP2	chr5:81412804-81751797	-0.307383	-0.33059
210835_s_at	CTBP2	chr10:124984317-125161170	0.545454	0.449383
210840_s_at	IQGAP1	chr15:90388242-90502239	0.424267	0.445992
210847_x_at	TNFRSF25	chr1:6460786-6466175	0.499274	0.479288
210854_x_at	SLC6A8	chrX:1139577-1147868	0.311442	0.393462
210944_s_at	CAPN3	chr15:42348103-42412317	0.778208	0.933141
210967_x_at	CACNB1	chr17:39173453-39197702	-0.323857	-0.402693
210968_s_at	RTN4	chr2:54972187-55112621	-0.333945	-0.609225
210988_s_at	PRUNE1	chr1:150980953-151007683	-0.266839	-0.435906
210991_s_at	RIMS3	chr1:40620680-40665682	-0.287248	-0.402748
210994_x_at	TRIM23	chr5:65589690-65625975	-0.593764	-0.934706
210995_s_at	TRIM23	chr5:65589690-65625975	-0.646592	-0.900586
211031_s_at	CLIP2	chr7:74289407-74405935	0.377216	0.480366
211033_s_at	PEX7	chr6:136822564-136913934	-0.278989	-0.327081
211042_x_at	MCAM	chr5:36151989-36196849	0.298311	0.321895
211056_s_at	SRD5A1	chr5:6633427-6674386	-0.313741	-0.344784
211071_s_at	MLLT11	chr1:151060397-151069544	-0.269411	-0.271524
211090_s_at	PRPF4B	chr6:4021267-4064983	-0.613541	-0.575546
211114_x_at	GEMIN2	chr14:39114285-39136973	-0.366433	-0.48732
211115_x_at	GEMIN2	chr14:39114285-39136973	-0.382258	-0.496674
211150_s_at	DLAT	chr11:112025408-112064404	-0.551401	-0.688947
211203_s_at	CNTN1	chr12:40692439-41072415	-0.841657	-1.05468
211220_s_at	HSF2	chr6:122399551-122433119	-0.40326	-0.477538
211259_s_at	BMP7	chr20:57168753-57266641	0.301378	0.38137
211270_x_at	PTBP1	chr19:797075-812327	0.356223	0.544244
211271_x_at	PTBP1	chr19:797075-812327	0.359382	0.484534
211275_s_at	GYG1	chr3:148991408-149031775	0.336885	0.418551
211286_x_at	CSF2RA	chrX:1268800-1310381	0.265289	0.440438
211318_s_at	RAE1	chr20:57351223-57379211	-0.318882	-0.620604
211337_s_at	TUBGCP4	chr15:43369221-43409771	-0.427361	-0.96709
211379_x_at	B3GALNT1	chr3:161083883-161105411	-1.07563	-0.891161
211404_s_at	APLP2	chr11:130068147-130144811	-0.439603	-0.636477
211405_x_at	IFNA17	chr9:21206181-21207143	-0.350649	-0.494372
211426_x_at	GNAQ	chr9:77716097-78031811	-0.327287	-0.394463
211474_s_at	SERPINB6	chr6:2948159-2972165	0.424339	0.492896
211502_s_at	CDK14	chr7:90466424-91210590	-0.515574	-0.62963
211504_x_at	ROCK2	chr2:11179759-11348330	-0.357477	-0.547523
211513_s_at	OGFR	chr20:62804835-62814000	0.274715	0.59134
211520_s_at	GRIA1	chr5:153489615-153813869	-0.497971	-0.56916
211534_x_at	PTPRN2	chr7:157539056-158587823	-0.362419	-0.480625
211538_s_at	HSPA2	chr14:64535905-64546173	0.894879	1.13411
211546_x_at	SNCA	chr4:89700345-89838315	-0.499723	-0.812078
211547_s_at	PAFAH1B1	chr17:2593210-2685615	-0.926786	-1.17306
211555_s_at	GUCY1B1	chr4:156680241-156727700	-0.727866	-0.9881
211559_s_at	CCNG2	chr4:77157207-77433388	-0.525333	-1.01609
211561_x_at	MAPK14	chr6:36027782-36111236	-0.427077	-0.617932
211565_at	SH3GL3	chr15:83447228-83633820	-0.381765	-0.392385
211571_s_at	VCAN	chr5:83471618-83582303	0.542456	0.913101
211575_s_at	UBE3A	chr15:25333728-25439051	-0.420788	-0.436818
211586_s_at	ATP2B2	chr3:10324023-10708007	-0.668904	-1.12614
211594_s_at	MRPL9	chr1:151759647-151763496	-0.270784	-0.370464
211597_s_at	HOPX	chr4:56647988-56681899	-0.364383	-0.471603
211599_x_at	MET	chr7:116672196-116798377	-0.426039	-0.550226
211622_s_at	ARF3	chr12:48903503-48957365	-0.546166	-0.391204
211698_at	EID1	chr15:48878134-48880173	-0.339724	-0.383523
211702_s_at	USP32	chr17:60177327-60422470	-0.27752	-0.442416
211710_x_at	RPL4	chr15:66498015-66524532	0.330252	0.356261
211725_s_at	BID	chr22:17734138-17774770	-0.435089	-0.388957
211762_s_at	KPNA2	chr17:64749663-64781707	-0.286917	-0.337529
211763_s_at	UBE2B	chr5:134371184-134392108	-0.297459	-0.475683
211776_s_at	EPB41L3	chr18:5392381-5630700	-0.454061	-0.48407
211793_s_at	ABI2	chr2:203328280-203447728	-0.551501	-0.680511
211812_s_at	B3GALNT1	chr3:161083883-161105411	-0.84982	-0.957661
211841_s_at	TNFRSF25	chr1:6460786-6466175	0.408271	0.340162
211855_s_at	SLC25A14	chrX:130339888-130373361	-0.275456	-0.409151
211871_x_at	GNB5	chr15:52115100-52191392	-0.563362	-0.79548
211890_x_at	CAPN3	chr15:42348103-42412317	0.730027	0.911849
211925_s_at	PLCB1	chr20:8077251-8968360	-0.769653	-0.883507
211945_s_at	ITGB1	chr10:32887273-33005792	0.466252	0.777363
211955_at	IPO5	chr13:97953658-98024296	-0.325323	-0.47379
211971_s_at	LRPPRC	chr2:43886224-43996226	-0.347594	-0.419778
211974_x_at	RBPJ	chr4:26163455-26435131	0.264069	0.543567
211976_at	NUDT3	chr6:34279679-34392669	0.30298	0.297478
211986_at	AHNAK	chr11:62433542-62556235	0.554726	0.691913
211992_at	WNK1	chr12:752579-911452	0.424743	0.598677
211993_at	WNK1	chr12:752579-911452	0.388374	0.376133
211994_at	WNK1	chr12:752579-911452	0.307893	0.586785
211998_at	H3-3B	chr17:73772512-73775840	0.484593	0.847567
212006_at	UBXN4	chr2:135741734-135785056	0.339207	0.675519
212007_at	UBXN4	chr2:135741734-135785056	0.537846	0.713918
212015_x_at	PTBP1	chr19:797075-812327	0.346255	0.538884
212038_s_at	VDAC1	chr5:133971871-134004975	-0.317839	-0.391891
212041_at	ATP6V0D1	chr16:67438014-67481181	-0.281403	-0.586369
212081_x_at	PRRC2A	chr6:31602891-31619942	0.271417	0.487459
212092_at	PEG10	chr7:94656325-94669695	-0.725937	-0.629037
212096_s_at	MTUS1	chr8:17643795-17801094	0.462642	0.819241
212117_at	RHOQ	chr2:46541806-46584688	0.47772	0.578349
212119_at	RHOQ	chr2:46541806-46584688	0.461663	0.596887
212120_at	RHOQ	chr2:46541806-46584688	0.404262	0.592208
212122_at	RHOQ	chr2:46541806-46584688	0.501525	0.648354
212144_at	SUN2	chr22:38733290-38794143	0.332237	0.520413
212145_at	MRPS27	chr5:72214953-72321717	-0.30005	-0.299889
212185_x_at	MT2A	chr16:56608584-56609497	0.826835	0.933323
212194_s_at	TM9SF4	chr20:32109714-32167258	-0.399033	-0.550362
212216_at	PREPL	chr2:44316281-44361862	-0.904161	-1.36803
212217_at	PREPL	chr2:44316281-44361862	-0.478348	-0.813531
212259_s_at	PBXIP1	chr1:154944076-154956123	0.539962	0.599347
212271_at	MAPK1	chr22:21759657-21867680	-0.294893	-0.599599
212288_at	FNBP1	chr9:129887187-130043189	0.558933	0.674786
212299_at	NEK9	chr14:75079353-75127344	0.388081	0.424918
212306_at	CLASP2	chr3:33496245-33718356	-0.397186	-0.618726
212308_at	CLASP2	chr3:33496245-33718356	-0.36134	-0.346694
212339_at	EPB41L1	chr20:36091504-36232799	0.407923	0.361969
212359_s_at	ZSWIM8	chr10:73785606-73801797	0.276039	0.412056
212365_at	MYO1B	chr2:191245185-191425389	-0.443192	-0.564509
212373_at	FEM1B	chr15:68277745-68295862	-0.66358	-0.890806
212374_at	FEM1B	chr15:68277745-68295862	-0.569731	-0.591581
212397_at	RDX	chr11:109864295-110296712	0.621369	1.00424
212408_at	TOR1AIP1	chr1:179882042-179920077	0.359721	0.436487
212418_at	ELF1	chr13:40931924-41061440	0.546129	0.788038
212419_at	ZCCHC24	chr10:79382325-79445624	0.573314	1.02435
212423_at	ZCCHC24	chr10:79382325-79445624	0.551401	0.994097
212437_at	CENPB	chr20:3783851-3786740	0.432867	0.559461
212453_at	KIFBP	chr10:70748486-70776738	-0.267859	-0.352341
212461_at	AZIN1	chr8:102826111-102893864	-0.489532	-0.396372
212463_at	CD59	chr11:33703010-33736479	0.610131	0.683756
212487_at	GPATCH8	chr17:44395281-44503430	0.424863	0.496115
212494_at	TNS2	chr12:53046969-53064379	0.283208	0.531625
212508_at	MOAP1	chr14:93182196-93184928	-0.410108	-0.52691
212514_x_at	DDX3X	chrX:41333348-41364472	-0.462044	-0.566727
212520_s_at	SMARCA4	chr19:10960932-11079426	0.373066	0.767219
212522_at	PDE8A	chr15:84980440-85139145	0.693251	1.01581
212548_s_at	FRYL	chr4:48497357-48780322	0.40553	0.639251
212553_at	RPRD2	chr1:150363091-150476566	0.296387	0.366013
212554_at	CAP2	chr6:17393595-17557780	-0.273363	-0.343921
212556_at	SCRIB	chr8:143777927-143802386	0.349246	0.458152
212561_at	DENND5A	chr11:9138825-9265959	0.350874	0.49226
212566_at	MAP4	chr3:47850690-48089272	0.468373	0.709172
212567_s_at	MAP4	chr3:47850690-48089272	0.395024	0.510157
212568_s_at	DLAT	chr11:112025408-112064404	-0.571905	-0.607605
212571_at	CHD8	chr14:21385194-21456126	0.282155	0.363664
212586_at	CAST	chr5:96525267-96779595	0.437289	0.446624
212594_at	PDCD4	chr10:110871795-110900006	0.329345	0.437227
212600_s_at	UQCRC2	chr16:21953288-21983660	-0.26326	-0.355274
212607_at	AKT3	chr1:243488233-243855434	-0.306423	-0.561889
212636_at	QKI	chr6:163414000-163578592	0.517832	0.694162
212665_at	TIPARP	chr3:156673235-156706770	0.560564	0.853289
212712_at	CAMSAP1	chr9:135808487-135907546	-0.430821	-0.554229
212715_s_at	MICAL3	chr22:17787649-18024561	0.483975	0.403956
212719_at	PHLPP1	chr18:62715541-62980433	0.553616	0.632334
212723_at	JMJD6	chr17:76712832-76726799	0.492225	0.620519
212726_at	PHF2	chr9:93576584-93679587	0.349274	0.283544
212728_at	DLG3	chrX:70444835-70505490	-0.378413	-0.581124
212729_at	DLG3	chrX:70444835-70505490	-0.36592	-0.669331
212730_at	SYNM	chr15:99098217-99135593	0.318892	0.375537
212751_at	UBE2N	chr12:93405673-93441947	-0.302678	-0.321462
212752_at	CLASP1	chr2:121337776-121649476	0.267701	0.385386
212763_at	CAMSAP2	chr1:200738893-200860704	-0.495615	-0.610431
212773_s_at	TOMM20	chrX:73223124-73223558	-0.545956	-0.83832
212778_at	PACS2	chr14:105300563-105398147	0.319019	0.607891
212793_at	DAAM2	chr6:39792298-39904877	0.552396	0.973563
212820_at	DMXL2	chr15:51447711-51622833	-0.345764	-0.5025
212829_at	PIP4K2A	chr10:22534854-22714578	0.68396	1.17402
212833_at	SLC25A46	chr5:110738136-110765161	-0.500492	-0.655923
212835_at	ABRAXAS2	chr10:126490384-126525236	-0.292389	-0.474365
212841_s_at	PPFIBP2	chr11:7513298-7657127	0.409739	0.386004
212852_s_at	RO60	chr1:193028763-193055329	0.470265	0.660013
212854_x_at	NBPF1	chr1:4612-29626	0.326808	0.442671
212857_x_at	SUB1	chr5:32531633-32604079	-0.465786	-0.298353
212859_x_at	MT1E	chr16:56625475-56627112	0.802957	0.946533
212877_at	KLC1	chr14:103562962-103685924	-0.40579	-0.729103
212878_s_at	KLC1	chr14:103562962-103685924	-0.338503	-0.726445
212886_at	CCDC69	chr5:151181052-151224093	0.379475	0.487254
212887_at	SEC23A	chr14:39031919-39109646	-0.489918	-0.811715
212946_at	VWA8	chr13:41566835-41961120	0.374741	0.522515
212956_at	TBC1D9	chr4:140620782-140756385	-0.32016	-0.364127
212960_at	TBC1D9	chr4:140620782-140756385	-0.490174	-0.461446
212961_x_at	EOLA2	chrX:149100414-149106703	-0.403111	-0.520486
212981_s_at	TCAF1	chr7:143851375-143902198	-0.379947	-0.591707
212993_at	NACC2	chr9:136006537-136095289	0.655126	0.861339
213005_s_at	KANK1	chr9:470291-746105	0.685052	0.96172
213034_at	SIK3	chr11:116843402-117098437	0.486803	0.425902
213073_at	ZFYVE26	chr14:67727374-67816590	0.271887	0.372098
213074_at	PHIP	chr6:78934419-79078287	0.520343	0.53517
213096_at	TMCC2	chr1:205227946-205285632	0.415061	0.377951
213118_at	UHRF1BP1L	chr12:100028455-100142874	-0.425678	-0.340117
213128_s_at	UBE3A	chr15:25333728-25439051	-0.378833	-0.501158
213131_at	OLFM1	chr9:135075422-135121180	-0.293138	-0.623803
213144_at	GOSR2	chr17:46923075-46975524	-0.358005	-0.343773
213149_at	DLAT	chr11:112025408-112064404	-0.383082	-0.489848
213227_at	PGRMC2	chr4:128269237-128288829	-0.283658	-0.412544
213230_at	CDR2L	chr17:74987632-75005800	0.289124	0.282613
213236_at	SASH1	chr6:148272304-148552044	0.689149	0.669333
213256_at	MARCHF3	chr5:126205277-126366241	0.358483	0.63628
213289_at	APOOL	chrX:85003877-85093315	-0.384124	-0.509305
213291_s_at	UBE3A	chr15:25333728-25439051	-0.317023	-0.50977
213305_s_at	PPP2R5C	chr14:101761709-101927989	-0.416266	-0.44763
213315_x_at	EOLA1	chrX:148622542-148629875	-0.421838	-0.608851
213325_at	NECTIN3	chr3:110790512-110854797	-1.06072	-1.03791
213327_s_at	USP12	chr13:27066156-27171811	-0.342509	-0.455536
213328_at	NEK1	chr4:169369704-169612632	0.486231	0.570946
213331_s_at	NEK1	chr4:169369704-169612632	0.360016	0.531684
213357_at	GTF2H5	chr6:158168350-158199344	-0.303322	-0.275422
213381_at	VSTM4	chr10:49014236-49115522	0.300614	0.305304
213383_at	SBF1	chr22:50443219-50483923	0.338819	0.404843
213388_at	PDE4DIP	chr1:148808140-149048286	0.524545	0.620396
213390_at	ZC3H4	chr19:47064187-47113776	0.319896	0.335351
213400_s_at	TBL1X	chrX:9463320-9741037	0.400175	0.744286
213404_s_at	RHEB	chr10:47706203-47706802	-0.371065	-0.4259
213417_at	TBX2	chr17:61399843-61409466	0.328057	0.40072
213423_x_at	TUSC3	chr8:15417215-15766649	-0.713349	-0.71232
213438_at	NFASC	chr1:204828651-205022822	0.309922	0.42732
213447_at	IPW	chr15:24978583-25420336	0.323501	0.309873
213461_at	NUDT21	chr16:56429133-56452199	-0.751833	-1.0738
213465_s_at	PPP1R7	chr2:241149576-241183652	-0.283572	-0.342301
213473_at	BRAP	chr12:111642146-111685956	0.359843	0.356911
213496_at	PLPPR4	chr1:99264292-99309590	-0.602061	-0.673844
213532_at	ADAM17	chr2:9488486-9556732	0.388695	0.39304
213562_s_at	SQLE	chr8:124998497-125022283	-0.384849	-0.52153
213588_x_at	RPL14	chr12:62965325-62965969	0.299739	0.466587
213608_s_at	SRRD	chr22:26483877-26494658	-0.293657	-0.417772
213617_s_at	TPGS2	chr18:36777647-36829216	-0.464869	-0.433251
213656_s_at	KLC1	chr14:103561896-103714249	0.452061	0.817733
213675_at	PARVA	chr11:12377563-12535356	0.315021	0.483684
213721_at	SOX2	chr3:181711925-181714436	0.497032	0.895264
213745_at	ATRNL1	chr10:115093365-115948999	-0.767855	-1.12995
213763_at	HIPK2	chr7:139561570-139777998	0.324917	0.545482
213791_at	PENK	chr8:56436674-56446671	-0.906202	-0.859209
213807_x_at	MET	chr7:116672196-116798377	-0.415498	-0.460511
213824_at	OLIG2	chr21:33025935-33029196	0.381158	0.499824
213825_at	OLIG2	chr21:33025935-33029196	0.565463	0.836392
213839_at	CLMN	chr14:95181940-95319908	0.601054	0.737166
213841_at	TNR	chr1:175315194-175743616	0.350182	0.749729
213843_x_at	SLC6A8	chrX:1139577-1147868	0.359217	0.430144
213850_s_at	SCAF11	chr12:45919131-45992120	0.420289	0.588201
213911_s_at	H2AZ1	chr4:100869244-100870040	-0.369628	-0.532459
213924_at	GNAL	chr18:11689264-11885685	-0.303601	-0.54949
214087_s_at	MYBPC1	chr12:101568353-101686028	0.649735	1.08346
214212_x_at	FERMT2	chr14:52857268-52952435	0.510976	0.642683
214230_at	CDC42	chr1:22025142-22092943	-0.412286	-0.56666
214257_s_at	SEC22B	chr1:145116336-145116919	-0.453368	-0.535076
214269_at	SLC49A3	chr4:675617-683062	0.345025	0.341157
214292_at	ITGB4	chr17:75721328-75757818	0.29341	0.357529
214293_at	SEPTIN11	chr4:77960893-77961305	-0.432374	-0.669047
214298_x_at	SEPTIN6	chrX:118752147-118767458	0.33892	0.305172
214312_at	FOXA2	chr20:22562134-22563036	0.294391	0.316093
214318_s_at	FRY	chr13:31846713-32299125	-0.468494	-0.618915
214365_at	TPM3	chr1:154155308-154194648	-0.38287	-0.438565
214436_at	FBXL2	chr3:33277025-33403662	-0.277706	-0.30898
214439_x_at	BIN1	chr2:127048027-127107288	0.417914	0.638485
214449_s_at	RHOQ	chr2:46541806-46584688	0.355944	0.534297
214475_x_at	CAPN3	chr15:42348103-42412317	0.903051	1.12467
214512_s_at	SUB1	chr5:32531633-32604079	-0.476701	-0.54626
214553_s_at	ARPP19	chr15:52547045-52569883	-1.03153	-1.20684
214581_x_at	TNFRSF21	chr6:47231532-47309905	-0.60936	-0.691444
214589_at	FGF12	chr3:192139390-192767764	-0.665633	-0.840904
214616_at	H3C6	chr6:26225382-26226385	-0.263538	-0.379002
214638_s_at	CCNT2	chr2:134918235-134959342	-0.322439	-0.362469
214666_x_at	IREB2	chr15:78437431-78501453	-0.46127	-0.681379
214671_s_at	ABR	chr17:1003519-1116206	-0.361557	-0.481462
214694_at	MPRIP	chr17:17042457-17217679	-0.428455	-0.360158
214710_s_at	CCNB1	chr5:69167135-69178245	-0.386142	-0.449746
214761_at	ZNF423	chr16:49487524-49857919	0.389161	0.671321
214762_at	ATP6V1G2	chr6:31535211-31537597	-0.403382	-0.426066
214772_at	KIAA1549L	chr11:33376108-33674102	-0.563452	-0.823262
214797_s_at	CDK18	chr1:205504596-205532793	0.374297	0.574291
214799_at	NFASC	chr1:204828651-205022822	0.403493	0.626693
214807_at	PLXDC2	chr10:19816239-20289856	0.43876	0.688904
214811_at	RIMBP2	chr12:130396133-130768228	-0.499843	-0.426882
214823_at	ZNF204P	chr6:27358252-27359854	-0.373564	-0.434096
214844_s_at	DOK5	chr20:54475593-54651169	-0.329383	-0.37249
214848_at	YWHAZ	chr8:100916523-100953388	-0.354159	-0.407336
214875_x_at	APLP2	chr11:130068147-130144811	-0.318136	-0.585386
214909_s_at	DDAH2	chr6:31714445-31718024	0.275227	0.516977
214923_at	ATP6V1D	chr14:67294371-67360265	-0.274616	-0.28239
214930_at	SLITRK5	chr13:87671371-87696272	-0.38233	-0.695743
214931_s_at	SRPK2	chr7:105110704-105399308	-0.363133	-0.539663
214952_at	NCAM1	chr11:112961247-113278436	0.658203	0.619225
214959_s_at	API5	chrX:116106921-116108430	-0.723793	-0.714004
215020_at	NRXN3	chr14:78170373-79868291	-0.824571	-1.00505
215120_s_at	SAMD4A	chr14:54566117-54793315	0.301695	0.419573
215143_at	DPY19L2P2	chr7:102910392-102912520	-0.355724	-0.520882
215227_x_at	ACP1	chr2:264140-278283	-0.430009	-0.558129
215245_x_at	FMR1	chrX:147911919-147951125	-0.351599	-0.348084
215270_at	LFNG	chr7:2512529-2529177	0.283007	0.440012
215303_at	DCLK1	chr13:35768652-36131382	-0.60329	-1.32046
215307_at	ZNF529	chr19:36534774-36605276	-0.469338	-0.344106
215380_s_at	GGCT	chr7:30496621-30504841	-0.566605	-0.519165
215531_s_at	GABRA5	chr15:26866911-26949208	-1.15085	-1.12945
215543_s_at	LARGE1	chr22:33669070-34316410	-0.436288	-0.581373
215684_s_at	ASCC2	chr22:29788609-29838304	0.475059	0.446963
215687_x_at	PLCB1	chr20:8077251-8968360	-0.705393	-0.874337
215707_s_at	PRNP	chr20:4686350-4701590	-0.612904	-0.983173
215716_s_at	ATP2B1	chr12:89588049-89709366	-0.394406	-0.834576
215728_s_at	ACOT7	chr1:6264269-6393767	-0.494978	-0.724562
215736_at	KCNV1	chr8:109963636-109975771	-0.626234	-0.703586
215807_s_at	PLXNB1	chr3:48403854-48430086	0.468515	0.661426
215913_s_at	GULP1	chr2:188291669-188595931	-0.411336	-0.565339
215952_s_at	OAZ1	chr19:2269509-2273490	-0.318004	-0.448218
215970_at	LOC100130331	chr1:237926831-237927605	-0.329485	-0.344396
216048_s_at	RHOBTB3	chr5:95713522-95824383	0.665677	0.863595
216096_s_at	NRXN1	chr2:49918503-51225575	-0.709183	-1.31543
216120_s_at	ATP2B2	chr3:10324023-10708007	-0.644836	-1.40165
216125_s_at	RANBP9	chr6:13621498-13711835	-0.440938	-0.54229
216184_s_at	RIMS1	chr6:71886550-72403150	-0.500006	-0.553206
216218_s_at	PLCL2	chr3:16802651-17090582	-0.818336	-1.23473
216241_s_at	TCEA1	chr8:53966552-54022456	0.301841	0.453835
216266_s_at	ARFGEF1	chr8:67173511-67343781	-0.473025	-0.690998
216306_x_at	PTBP1	chr19:797075-812327	0.507859	0.635262
216307_at	DGKB	chr7:14145049-14974777	-0.849759	-0.836896
216336_x_at	MT1E	chr1:33416742-33417152	0.648139	0.811893
216360_x_at	RRP12	chr10:97356358-97426076	-0.315271	-0.431878
216593_s_at	PIGC	chr11:33075566-33076460	-0.387361	-0.464611
216604_s_at	SLC7A8	chr14:23598932-23652346	-0.533638	-0.578899
216620_s_at	ARHGEF10	chr8:1823976-1958641	0.510216	0.57373
216701_at	C1orf68	chr1:152692385-152692801	0.283181	0.413477
216843_x_at	PMS2P1	chr7:73037371-73049246	-0.272403	-0.354957
216940_x_at	YBX1	chr1:43148236-43148462	0.384565	0.513336
216959_x_at	NRCAM	chr7:108147623-108456717	-0.632564	-0.916723
216971_s_at	PLEC	chr8:143915153-143976734	0.509082	0.448093
216985_s_at	STX3	chr11:59713456-59805882	-0.274089	-0.422097
216996_s_at	FASTKD2	chr2:206765357-206796189	-0.316914	-0.36585
217008_s_at	GRM7	chr3:6770001-7741533	-0.391032	-0.635673
217099_s_at	GEMIN4	chr17:744421-753999	-0.285109	-0.383369
217118_s_at	KIAA0930	chr22:45192244-45240894	0.583386	0.548449
217139_at	VDAC1	chrY:5207215-5208069	-0.314703	-0.374818
217140_s_at	VDAC1	chrY:5207215-5208069	-0.456027	-0.565619
217188_s_at	ERG28	chr14:76117897-76127214	-0.342481	-0.463913
217197_x_at	N4BP2L1	chr13:32400723-32428311	-0.283093	-0.408441
217280_x_at	GABRA5	chr15:26866911-26949208	-0.902106	-0.709801
217356_s_at	PGK1	chrX:77910739-78129295	-0.696219	-0.803711
217430_x_at	COL1A1	chr17:50184101-50201632	-0.325667	-0.50205
217457_s_at	RAP1GDS1	chr4:98261384-98443858	-0.560208	-0.683736
217556_at	CLCN4	chrX:10156975-10237660	-0.713786	-0.943412
217562_at	BRINP3	chr1:190097658-190478404	-0.503969	-0.447349
217585_at	NEBL	chr10:20779973-21293011	0.308978	0.40709
217734_s_at	WDR6	chr3:49007062-49015953	0.383265	0.401401
217741_s_at	ZFAND5	chr9:72351413-72365235	-0.4752	-0.742518
217755_at	JPT1	chr17:73132079-73150595	-0.463317	-0.519038
217762_s_at	RAB31	chr18:9708275-9862551	0.682537	0.929884
217763_s_at	RAB31	chr18:9708275-9862551	0.656849	0.831823
217764_s_at	RAB31	chr18:9708275-9862551	0.581958	0.903951
217773_s_at	NDUFA4	chr7:10931943-10940153	-0.292392	-0.274909
217781_s_at	ZNF106	chr15:42412823-42491141	0.32753	0.348348
217786_at	PRMT5	chr14:22920525-22929408	-0.278732	-0.377683
217807_s_at	NOP53	chr19:48248809-48260314	0.535268	0.592056
217809_at	BZW2	chr7:16646131-16706523	-0.324256	-0.495819
217813_s_at	SPIN1	chr9:88388430-88478694	-0.566225	-1.06029
217819_at	GOLGA7	chr8:41488200-41511095	0.339942	0.491436
217853_at	TNS3	chr7:47275154-47582558	0.6351	0.831259
217859_s_at	SLC39A9	chr14:69398015-69462390	-0.31871	-0.336326
217865_at	RNF130	chr5:179911651-180072113	0.432215	0.901501
217877_s_at	GPBP1L1	chr1:45627304-45688113	0.281247	0.277753
217883_at	MMADHC	chr2:149569637-149587778	-0.386602	-0.397548
217887_s_at	EPS15	chr1:51354263-51519328	-0.47615	-0.521433
217908_s_at	DCAF6	chr1:167935783-168075843	-0.448567	-0.786769
217915_s_at	RSL24D1	chr15:55180806-55197049	-0.635438	-0.562077
217919_s_at	MRPL42	chr12:93467514-93516214	-0.454812	-0.355248
217930_s_at	TOLLIP	chr11:1274371-1309654	-0.567319	-0.719721
217941_s_at	ERBIN	chr5:65222383-65376342	0.751231	1.07947
217976_s_at	DYNC1LI1	chr3:32525974-32570858	-0.503543	-0.565348
217985_s_at	BAZ1A	chr14:34752731-34875647	0.534016	0.87618
218027_at	MRPL15	chr8:54135241-54148514	-0.279144	-0.392822
218042_at	COPS4	chr4:83034447-83075818	-0.519393	-0.695673
218063_s_at	CDC42EP4	chr17:73283624-73312005	0.336665	0.427724
218085_at	CHMP5	chr9:33264879-33282070	-0.350954	-0.42456
218087_s_at	SORBS1	chr10:95311771-95561414	0.436238	0.570854
218101_s_at	NDUFC2	chr11:78016971-78079865	-0.280588	-0.336951
218111_s_at	CMAS	chr12:22046218-22065674	-0.487515	-0.540388
218118_s_at	TIMM23	chr10:45972489-46003742	-0.285981	-0.321429
218119_at	TIMM23	chr10:45972489-46003742	-0.378566	-0.541602
218120_s_at	HMOX2	chr16:4476649-4512306	-0.362091	-0.578792
218122_s_at	SENP2	chr3:185582496-185633551	-0.271664	-0.457093
218149_s_at	ZNF395	chr8:28345590-28402701	0.628553	0.576225
218159_at	DDRGK1	chr20:3190350-3204685	-0.279789	-0.373883
218163_at	MCTS1	chrX:120594010-120621159	-0.601689	-0.553663
218177_at	CHMP1B	chr18:11851413-11854444	-0.392583	-0.465006
218178_s_at	CHMP1B	chr18:11851413-11854444	-0.28863	-0.38576
218181_s_at	MAP4K4	chr2:101696850-101894690	0.55118	0.894451
218193_s_at	GOLT1B	chr12:21501781-21518408	-0.481199	-0.523498
218205_s_at	MKNK2	chr19:2037465-2051244	0.61648	0.826733
218209_s_at	RPRD1A	chr18:35984387-36067576	-0.584256	-0.775838
218217_at	SCPEP1	chr17:56978129-57006768	0.331184	0.369178
218224_at	PNMA1	chr14:73711783-73714384	-0.305734	-0.486798
218243_at	RUFY1	chr5:179550489-179611566	0.309403	0.317113
218251_at	MID1IP1	chrX:38801440-38806537	0.48355	0.878836
218276_s_at	SAV1	chr14:50632058-50668306	0.395189	0.411279
218289_s_at	UBA5	chr3:132654446-132679794	-0.409363	-0.440995
218330_s_at	NAV2	chr11:19350724-20121601	0.490032	0.565393
218364_at	LRRFIP2	chr3:37052626-37183689	0.324475	0.31416
218374_s_at	C12orf4	chr12:4487735-4538508	-0.530195	-0.516507
218398_at	MRPS30	chr5:44808947-44820428	-0.381034	-0.509745
218408_at	TIMM10	chr11:57528464-57530803	-0.276785	-0.278336
218437_s_at	LZTFL1	chr3:45823316-45916042	-0.273191	-0.51829
218439_s_at	COMMD10	chr5:116085016-116412762	-0.472042	-0.447736
218477_at	TMEM14A	chr6:52671113-52686588	-0.278812	-0.263295
218488_at	EIF2B3	chr1:44850522-44986722	-0.264486	-0.31612
218534_s_at	AGGF1	chr5:77029251-77065234	-0.267792	-0.413851
218573_at	MAGEH1	chrX:55452127-55453566	-0.265583	-0.285126
218576_s_at	DUSP12	chr1:161749758-161757238	-0.289389	-0.387325
218588_s_at	FAM114A2	chr5:153990148-154038936	0.273639	0.294597
218597_s_at	CISD1	chr10:58269162-58289586	-0.368886	-0.431748
218623_at	NSG2	chr5:173472761-173536181	-0.473639	-0.65305
218625_at	NRN1	chr6:5997999-6007605	-0.396815	-0.523356
218638_s_at	SPON2	chr4:1166932-1208962	-0.410475	-0.586655
218644_at	PLEK2	chr14:67386984-67412167	-0.331844	-0.389712
218648_at	CRTC3	chr15:90529923-90645345	0.384746	0.336604
218685_s_at	SMUG1	chr12:54121277-54189008	-0.383026	-0.370905
218694_at	ARMCX1	chrX:101550547-101554700	-0.268259	-0.352176
218773_s_at	MSRB2	chr10:23095579-23122013	0.268782	0.517761
218788_s_at	SMYD3	chr1:245749342-246507312	-0.318054	-0.540672
218813_s_at	SH3GLB2	chr9:129007036-129028331	-0.410924	-0.643161
218866_s_at	POLR3K	chr16:46407-53608	-0.491784	-0.584638
218867_s_at	SPRING1	chr12:117153595-117175843	-0.339786	-0.585082
218868_at	ACTR3B	chr7:152759749-152855378	-0.637588	-0.756735
218876_at	TPPP3	chr16:67389809-67393518	0.553965	0.777717
218888_s_at	NETO2	chr16:47077703-47143945	-0.624318	-0.944521
218890_x_at	MRPL35	chr2:86199355-86213790	-0.379692	-0.433298
218897_at	TMEM177	chr2:119679167-119686507	-0.442057	-0.480889
218902_at	NOTCH1	chr9:136494433-136546048	0.313932	0.503154
218915_at	NF2	chr22:29603556-29698598	0.348257	0.303134
218919_at	ZFAND1	chr8:81701334-81732903	-0.473822	-0.395045
219006_at	NDUFAF4	chr6:96889315-96897891	-0.612245	-0.472316
219077_s_at	WWOX	chr16:78099400-79212667	0.369769	0.565695
219089_s_at	ZNF576	chr19:43596392-43601157	-0.31755	-0.309836
219093_at	PID1	chr2:228850526-229271287	-0.379143	-0.394614
219115_s_at	IL20RA	chr6:136999971-137045180	0.273085	0.342595
219176_at	MAIP1	chr2:200820039-200828839	-0.30757	-0.311051
219186_at	ZBTB7A	chr19:4043303-4066899	0.354072	0.593263
219196_at	SCG3	chr15:51681492-51721026	-0.339855	-0.565606
219229_at	SLCO3A1	chr15:91853708-92172435	0.494676	0.863526
219240_s_at	C10orf88	chr10:122930901-122954311	-0.337324	-0.639897
219244_s_at	MRPL46	chr15:88459501-88546585	-0.295912	-0.413195
219260_s_at	ELP5	chr17:7251416-7259940	-0.348041	-0.317072
219280_at	BRWD1	chr21:39184176-39321559	0.27476	0.340744
219288_at	C3orf14	chr3:62319015-62336213	-0.279658	-0.335499
219302_s_at	CNTNAP2	chr7:148217288-148419466	-0.426597	-0.454187
219326_s_at	B3GNT2	chr2:62196115-62224731	-0.621339	-0.790964
219332_at	MICALL2	chr7:1428465-1459470	0.367548	0.641514
219343_at	CDC37L1	chr9:4679559-4708399	-0.40871	-0.567624
219356_s_at	CHMP5	chr9:33264879-33282070	-0.38718	-0.34745
219365_s_at	CAMKV	chr3:49857988-49869935	-0.376394	-0.518404
219378_at	NAA16	chr13:41311267-41377030	0.515725	0.775849
219387_at	CCDC88A	chr2:55287842-55419895	0.762124	0.983327
219402_s_at	DERL1	chr8:123013170-123042302	-0.27237	-0.389253
219421_at	TTC33	chr5:40512333-40755963	-0.415816	-0.487857
219423_x_at	TNFRSF25	chr1:6460786-6466175	0.58127	0.746359
219443_at	TASP1	chr20:13389392-13638932	-0.483994	-0.421637
219457_s_at	RIN3	chr14:92513781-92688994	0.273951	0.427024
219520_s_at	WWC3	chrX:10015254-10144474	0.345334	0.418339
219531_at	CEP72	chr5:612340-667168	-0.41592	-0.434055
219532_at	ELOVL4	chr6:79914814-79947553	-0.288406	-0.471339
219534_x_at	CDKN1C	chr11:2883205-2885904	0.526671	0.960417
219563_at	SYNE3	chr14:95873605-95876025	0.749202	0.826866
219633_at	TTPAL	chr20:44475874-44494603	-0.351392	-0.486776
219671_at	HPCAL4	chr1:39678648-39691485	-0.309818	-0.36879
219688_at	BBS7	chr4:121824329-121870487	-0.61343	-0.820296
219700_at	PLXDC1	chr17:39063313-39154394	-0.425826	-0.485324
219728_at	MYOT	chr5:137867858-137887851	0.514216	0.94759
219858_s_at	MFSD6	chr2:190408355-190509205	-0.93429	-1.21502
219911_s_at	SLCO4A1	chr20:62642503-62685785	0.714533	0.75902
219922_s_at	LTBP3	chr11:65538559-65558930	0.542195	0.699646
219931_s_at	KLHL12	chr22:20450122-20451824	-0.315679	-0.566626
219939_s_at	CSDE1	chr1:114716913-114758676	0.353277	0.498757
219960_s_at	UCHL5	chr1:193012250-193060080	-0.477656	-0.745821
219979_s_at	HIKESHI	chr11:86013268-86056704	-0.610426	-0.522733
219992_at	TAC3	chr12:57010000-57028883	-0.693176	-0.744867
219998_at	LGALSL	chr2:64453969-64461381	-0.344634	-0.451462
220025_at	TBR1	chr2:161416297-161425870	-0.462527	-0.755199
220030_at	STYK1	chr12:10618923-10674318	-0.643414	-0.906444
220097_s_at	TMEM104	chr17:74776499-74839753	0.289737	0.385669
220238_s_at	KLHL7	chr7:23105758-23177914	-0.469341	-0.514123
220282_at	RIC3	chr11:8106056-8169055	-0.484641	-0.734635
220294_at	KCNV1	chr8:109963636-109975771	-0.972531	-1.17522
220321_s_at	CCDC121	chr2:27625638-27629012	0.27261	0.264815
220331_at	CYP46A1	chr14:99684298-99727301	-0.293322	-0.372943
220359_s_at	ARPP21	chr3:35638945-35794496	-0.52825	-0.734245
220408_x_at	SUPT20H	chr13:37009312-37059713	0.389771	0.471053
220456_at	SPTLC3	chr20:13008972-13169103	0.32721	0.295816
220606_s_at	ADPRM	chr17:10697594-10711558	-0.296112	-0.385246
220609_at	LOC202181	chr5:177045121-177046739	0.326934	0.445249
220690_s_at	DHRS7B	chr17:21123364-21193265	-0.287183	-0.416378
220731_s_at	NECAP2	chr1:16440721-16460078	0.329799	0.365367
220753_s_at	CRYL1	chr13:20403666-20525873	0.373804	0.458032
220768_s_at	CSNK1G3	chr5:123512177-123617049	-0.340766	-0.499525
220773_s_at	GPHN	chr14:66507407-67181803	-0.474146	-0.546519
220889_s_at	CA10	chr17:51630313-52160017	-0.8126	-1.08867
220917_s_at	WDR19	chr4:39182504-39285810	0.29614	0.362274
221042_s_at	CLMN	chr14:95181940-95319908	0.298886	0.531756
221082_s_at	NDRG3	chr20:36651766-36746090	-0.745389	-1.15161
221097_s_at	KCNMB2	chr3:178419123-178843300	-0.46867	-0.304719
221114_at	AMBN	chr4:70592256-70607288	-0.315273	-0.391792
221207_s_at	NBEA	chr13:34942270-35673022	-0.453378	-0.801202
221246_x_at	TNS1	chr2:217799588-218033982	0.491819	0.591248
221268_s_at	SGPP1	chr14:63684216-63728065	-0.487827	-0.507582
221279_at	GDAP1	chr8:74320613-74518007	-0.703756	-0.79466
221295_at	CIDEA	chr18:12254361-12277595	-0.325342	-0.402405
221310_at	FGF14	chr13:101710804-102402457	-0.599817	-1.1428
221362_at	HTR5A	chr7:155070324-155087392	-0.318175	-0.383704
221423_s_at	YIPF5	chr5:144158162-144170714	-0.368976	-0.688399
221425_s_at	ISCA1	chr5:62776877-62777263	-0.684332	-0.8269
221447_s_at	GLT8D2	chr12:103988987-104064183	-0.343472	-0.493443
221449_s_at	ITFG1	chr16:47154387-47464149	-0.613509	-0.969636
221452_s_at	TMEM14B	chr10:68544489-68544833	-0.709216	-0.616371
221465_at	OR6A2	chr11:6815955-6816939	-0.353179	-0.492694
221471_at	SERINC3	chr20:44496221-44522085	-0.390072	-0.494992
221482_s_at	ARPP19	chr15:52547045-52569883	-0.690715	-0.647632
221518_s_at	USP47	chr11:11841423-11961887	0.356949	0.568147
221531_at	WDR61	chr15:78277835-78299703	-0.656577	-0.524194
221547_at	PRPF18	chr10:13586939-13668445	-0.378176	-0.325184
221556_at	CDC14B	chr9:96490241-96619843	0.465739	0.617412
221588_x_at	ALDH6A1	chr14:74056847-74084492	0.577326	0.577318
221696_s_at	STYK1	chr12:10618923-10674318	-0.606202	-0.657106
221702_s_at	TM2D3	chr15:101621444-101652391	-0.305438	-0.304889
221725_at	WASF2	chr1:27404230-27490167	0.310379	0.390094
221727_at	SUB1	chr5:32531633-32604079	-0.405914	-0.388652
221731_x_at	VCAN	chr5:83471618-83582303	0.63348	0.93493
221737_at	GNA12	chr7:2728105-2844308	0.334165	0.281351
221747_at	TNS1	chr2:217799588-218033982	0.479573	0.44689
221748_s_at	TNS1	chr2:217799588-218033982	0.667162	0.952381
221774_x_at	SUPT20H	chr13:37009312-37059713	0.331974	0.365345
221803_s_at	NRBF2	chr10:63133247-63155031	-0.454429	-0.515934
221805_at	NEFL	chr8:24950955-24956721	-0.500962	-0.883455
221828_s_at	MVB12B	chr9:126326829-126507041	0.360141	0.423425
221829_s_at	TNPO1	chr5:72816312-72916733	0.62187	0.658623
221868_at	PAIP2B	chr2:71182738-71227103	0.501122	0.971605
221891_x_at	HSPA8	chr11:123057489-123063230	-0.357912	-0.571405
221893_s_at	ADCK2	chr7:140672945-140696261	-0.340296	-0.564797
221904_at	FAM131A	chr3:184335926-184348421	-0.497981	-0.50268
221920_s_at	SLC25A37	chr8:23528956-23575463	0.519705	0.678316
221922_at	GPSM2	chr1:108875350-108934545	0.515287	0.536645
221934_s_at	DALRD3	chr3:49015488-49022293	-0.327024	-0.481673
221950_at	EMX2	chr10:117542445-117549546	0.742649	0.972624
221960_s_at	RAB2A	chr8:61429772-61504529	-0.49122	-0.485456
222005_s_at	GNG3	chr11:62707676-62709201	-0.503279	-0.896568
222095_s_at	FAM163A	chr1:179743291-179816198	-0.395183	-0.342285
222230_s_at	ACTR10	chr14:58200080-58235636	-0.405236	-0.433628
222258_s_at	SH3BP4	chr2:234952017-235055714	0.662975	0.912345
222380_s_at	PDCD6	chr3:195369362-195370046	0.602936	0.744706
222393_s_at	NAA50	chr3:113716458-113746300	-0.608633	-0.571629
222396_at	JPT1	chr17:73131345-73132211	-0.367111	-0.481698
222407_s_at	ZNF106	chr15:42412823-42491141	0.470872	0.581746
222408_s_at	YPEL5	chr2:30146941-30160533	-0.286944	-0.467962
222414_at	KMT2C	chr7:152134922-152436644	0.516973	0.574934
222422_s_at	NDFIP1	chr5:142108779-142154440	-0.587772	-0.866985
222442_s_at	ARL8B	chr3:5122249-5180911	-0.677822	-0.866642
222459_at	AKIRIN1	chr1:38991276-39006059	-0.395967	-0.465083
222465_at	RSL24D1	chr15:55180806-55197049	-0.466838	-0.448126
222466_s_at	MRPL42	chr12:93467514-93516214	-0.297097	-0.276295
222473_s_at	ERBIN	chr5:65222383-65376723	0.768552	0.999255
222479_s_at	DYNC1LI1	chr3:32525974-32570858	-0.473855	-0.535152
222500_at	PPIL1	chr6:36854827-36874803	-0.439558	-0.377281
222502_s_at	UFM1	chr13:38349849-38363619	-0.424459	-0.49896
222513_s_at	SORBS1	chr10:95311771-95561414	0.339193	0.406488
222530_s_at	MKKS	chr20:10401009-10434222	-0.621821	-0.512908
222531_s_at	AP5M1	chr14:57268924-57298742	-0.347858	-0.441302
222553_x_at	OXR1	chr8:106270144-106752694	-0.549603	-0.743723
222558_at	RPRD1A	chr18:35984387-36067576	-0.43824	-0.688833
222578_s_at	UBA5	chr3:132654446-132679794	-0.449026	-0.532148
222589_at	NLK	chr17:28041737-28196381	-0.375275	-0.79644
222590_s_at	NLK	chr17:28041737-28196381	-0.646258	-0.61077
222594_s_at	SPATS2	chr12:49366584-49527425	-0.286093	-0.3709
222613_at	C12orf4	chr12:4487735-4538508	-0.370797	-0.566819
222625_s_at	NDE1	chr16:15728421-15811507	0.353759	0.376866
222632_s_at	LZTFL1	chr3:45823316-45916042	-0.541384	-0.71266
222646_s_at	ERO1A	chr14:52639915-52695900	-0.343172	-0.388712
222651_s_at	TRPS1	chr8:115408496-115809673	0.441704	0.477488
222660_s_at	RNF38	chr9:36336396-36487548	-0.324438	-0.462905
222697_s_at	ABHD10	chr3:111979010-111993368	-0.415953	-0.682939
222703_s_at	YRDC	chr1:37802945-37808208	-0.353689	-0.35611
222735_at	TMEM38B	chr9:105694541-105776629	0.486221	0.544404
222774_s_at	NETO2	chr16:47077703-47143945	-0.89375	-1.09308
222775_s_at	MRPL35	chr2:86199355-86213790	-0.290542	-0.369759
222778_s_at	NSD2	chr4:1894508-1945273	-0.273884	-0.283986
222792_s_at	CCDC59	chr12:82223681-82358805	0.266362	0.40736
222819_at	CTPS2	chrX:16587999-16712936	0.33297	0.444423
222826_at	BLOC1S6	chr15:45587214-45615945	-0.623782	-0.909001
222867_s_at	MED31	chr17:6643311-6651634	-0.27299	-0.330409
222870_s_at	B3GNT2	chr2:62196115-62224731	-0.456542	-0.724404
222880_at	AKT3	chr1:243488233-243855434	-0.592124	-0.88183
222894_x_at	NDUFAF5	chr20:13785007-13821580	-0.440648	-0.545645
222983_s_at	PAIP2	chr5:139341587-139369720	-0.381275	-0.385051
222990_at	UBQLN1	chr9:83659968-83707958	-0.564129	-0.662376
222993_at	MRPL37	chr1:54184041-54225464	-0.389381	-0.542161
223010_s_at	OCIAD1	chr4:48805212-48861817	-0.584347	-0.686248
223021_x_at	VTA1	chr6:142147162-142224685	-0.585172	-0.628171
223026_s_at	VPS29	chr12:110491083-110502111	-0.359614	-0.322688
223027_at	SNX9	chr6:157700387-157945077	0.295061	0.366297
223043_at	EMC4	chr15:34225013-34230156	-0.383775	-0.360834
223058_at	FAM107B	chr10:14518557-14774897	0.884273	1.4374
223059_s_at	FAM107B	chr10:14518557-14774897	0.86817	1.40985
223063_at	C1orf198	chr1:230837119-230869589	0.508734	0.787208
223084_s_at	CCNDBP1	chr15:43185118-43197177	-0.447852	-0.599703
223090_x_at	VEZT	chr12:95217746-95302799	-0.300799	-0.367674
223134_at	BBX	chr3:107522936-107811339	0.535664	0.731306
223135_s_at	BBX	chr3:107522936-107811339	0.420045	0.458946
223140_s_at	DHX36	chr3:154275723-154284039	-0.370869	-0.343553
223145_s_at	AKIRIN2	chr6:87674860-87702233	-0.347475	-0.391151
223151_at	DCUN1D5	chr11:103050686-103092194	-0.347735	-0.279787
223156_at	MRPS23	chr17:57834781-57850056	-0.380788	-0.407081
223174_at	BTBD10	chr11:13388008-13463297	-0.322249	-0.439747
223190_s_at	KMT2E	chr7:104940943-105115019	0.324382	0.388924
223192_at	SLC25A28	chr10:99610519-99622793	0.265708	0.458763
223229_at	UBE2T	chr1:202331544-202341984	-0.551425	-0.622214
223243_s_at	EDEM3	chr1:184690237-184754907	-0.373519	-0.426442
223247_at	MED10	chr5:6371874-6378571	-0.267181	-0.336154
223263_s_at	FGFR1OP2	chr12:26938470-26966650	-0.622634	-1.017
223328_at	ARMC10	chr7:103086630-103099764	-0.326279	-0.329129
223334_at	TMEM126A	chr11:85647967-85656547	-0.306788	-0.288934
223340_at	ATL1	chr14:50532509-50634017	-0.266286	-0.419364
223341_s_at	SCOC	chr4:140257286-140385728	-1.02158	-1.05103
223349_s_at	BOK	chr2:241551424-241574131	0.482244	0.663492
223374_s_at	B3GALNT1	chr3:161083883-161105411	-0.554432	-0.655379
223383_at	ZNRF1	chr16:74999024-75110994	-0.37213	-0.633047
223443_s_at	AMZ2P1	chr17:68205481-68257712	-0.448438	-0.488448
223449_at	SEMA6A	chr5:116443555-116574823	0.425649	0.5469
223461_at	TBC1D7	chr6:13266542-13328583	-0.403548	-0.727745
223478_at	TIMM8B	chr11:112084800-112086798	-0.319946	-0.396172
223486_at	GTPBP8	chr3:112990984-113015060	-0.30852	-0.334002
223519_at	MAP3K20	chr2:173940634-174086948	0.507668	0.694715
223526_at	C18orf21	chr18:35972625-35979286	-0.282848	-0.277899
223527_s_at	CDADC1	chr13:49247925-49293485	-0.303223	-0.395692
223550_s_at	CA10	chr17:51630313-52160017	-0.594745	-0.903559
223572_at	HHATL	chr3:42692663-42702824	0.616462	0.773292
223650_s_at	NRBF2	chr10:63133247-63155031	-0.438395	-0.600002
223664_x_at	BCL2L13	chr22:17628855-17730855	-0.29712	-0.387238
223672_at	SGIP1	chr1:66533267-66751139	-0.543002	-0.485908
223675_s_at	VEZT	chr12:95217746-95302799	-0.290316	-0.329545
223708_at	C1QTNF4	chr11:47589667-47594411	-0.416727	-0.64526
223721_s_at	DNAJC12	chr10:67796669-67838188	-0.348742	-0.403245
223735_at	ARL6	chr3:97764521-97801229	-0.716025	-0.90571
223741_s_at	TTYH2	chr17:74213571-74262020	0.579843	0.948829
223748_at	SLC4A11	chr20:3227417-3239559	0.419255	0.406125
223821_s_at	SUSD4	chr1:223220819-223364233	-0.662675	-0.706865
223894_s_at	AKTIP	chr5:24170370-24171246	-0.350416	-0.416805
223954_x_at	NECAB3	chr20:33657087-33674463	-0.26798	-0.325358
223960_s_at	CDIP1	chr16:4512634-4526261	0.317061	0.282861
223996_s_at	MRPL30	chr2:99141485-99322741	-0.404276	-0.490001
224078_at	MFSD14C	chr9:94374569-94461042	-0.367406	-0.31499
224088_at	NMUR2	chr5:152391546-152433368	-0.458553	-0.545968
224173_s_at	MRPL30	chr2:99181152-99199561	-0.483547	-0.567091
224187_x_at	HSPA8	chr11:123057489-123063230	-0.355863	-0.527269
224215_s_at	DLL1	chr6:170282206-170306565	0.695925	0.527243
224311_s_at	CAB39	chr2:230712842-230821075	-0.592583	-0.635553
224367_at	BEX2	chrX:103309346-103311007	-0.301957	-0.292751
224368_s_at	NDRG3	chr20:36651766-36746090	-0.640458	-1.05233
224377_s_at	RAB18	chr10:27504174-27543207	-0.342261	-0.279272
224395_s_at	RNF7	chr3:141738249-141747560	-0.268062	-0.289478
224408_at	MCHR2	chr6:99918519-99994247	-0.57561	-0.724483
224409_s_at	TSSK6	chr19:19512418-19515548	0.304613	0.470455
224410_s_at	LMBR1	chr7:156668946-156893216	-0.756262	-0.944258
224413_s_at	TM2D2	chr8:38988808-38996824	-0.395288	-0.45669
224430_s_at	MTO1	chr6:73461578-73509236	-0.27413	-0.270511
224437_s_at	VTA1	chr6:142147162-142224685	-0.410625	-0.442923
224484_s_at	BRMS1L	chr14:35826338-35932325	-0.669517	-0.649302
224522_s_at	DCAKD	chr17:45023338-45061131	0.382117	0.41647
224530_s_at	KCNIP4	chr4:20728606-21948772	-0.904269	-0.925083
224562_at	WASF2	chr1:27404230-27490167	0.60649	0.872828
224575_at	BRK1	chr3:10115675-10127190	-0.281265	-0.289266
224583_at	COTL1	chr16:84565596-84618078	0.540699	0.905396
224586_x_at	SUB1	chr5:32531633-32604079	-0.494581	-0.312345
224587_at	SUB1	chr5:32531633-32604079	-0.712776	-0.746425
224595_at	SLC44A1	chr9:105244622-105439171	0.690184	0.639593
224614_at	DYNC1LI2	chr16:66720893-66751609	0.378112	0.527926
224616_at	DYNC1LI2	chr16:66720893-66751609	0.30614	0.455537
224624_at	LRRC8A	chr9:128882133-128918039	0.323321	0.359971
224630_at	ERLEC1	chr2:53787009-53833038	-0.557169	-0.707194
224641_at	FYTTD1	chr3:197737179-197787596	-0.268203	-0.318862
224647_at	CCNY	chr10:35247025-35572669	-0.448031	-0.458643
224649_x_at	CCNY	chr10:35247025-35572669	-0.676256	-0.725645
224650_at	MAL2	chr8:119165034-119245673	-0.991916	-1.42516
224659_at	SELENON	chr1:26126721-26144712	0.27014	0.422553
224662_at	KIF5B	chr10:32009015-32056425	0.509936	0.676017
224675_at	MESD	chr15:81268094-81282179	0.297595	0.553969
224681_at	GNA12	chr7:2728105-2844308	0.461077	0.735423
224704_at	TNRC6A	chr16:24610209-24827632	0.408603	0.376284
224736_at	CCAR1	chr10:68721012-68792377	0.348263	0.569118
224759_s_at	TMEM263	chr12:106955719-106978778	-0.309634	-0.297634
224760_at	SP1	chr12:53380176-53416446	0.44589	0.498675
224761_at	GNA13	chr17:65009289-65056740	0.556485	0.757232
224780_at	RBM17	chr10:6089034-6117457	0.329496	0.545587
224781_s_at	RBM17	chr10:6089034-6117457	0.368977	0.40864
224782_at	ZMAT2	chr5:140698680-140706686	-0.333991	-0.521747
224784_at	MLLT6	chr17:38506329-38530590	0.435683	0.53557
224787_s_at	RAB18	chr10:27504174-27543207	-0.263241	-0.307366
224790_at	ASAP1	chr8:130052104-130443674	-0.437898	-0.432545
224794_s_at	CERCAM	chr9:128411751-128437351	0.520846	0.870638
224799_at	NDFIP2	chr13:79481155-79556077	-0.858857	-1.13703
224801_at	NDFIP2	chr13:79481155-79556077	-0.387512	-0.709366
224802_at	NDFIP2	chr13:79481155-79556077	-0.722034	-0.815523
224810_s_at	ANKRD13A	chr12:109999186-110039763	0.411466	0.518629
224822_at	DLC1	chr8:13083361-13604610	0.433061	0.588059
224832_at	DUSP16	chr12:12473287-12562868	0.376756	0.387261
224840_at	FKBP5	chr6:35573585-35728583	1.27952	1.78377
224856_at	FKBP5	chr6:35573585-35728583	0.991947	1.2636
224862_at	GNAQ	chr9:77716097-78031811	-0.384821	-0.35823
224872_at	DIP2B	chr12:50504985-50748657	0.415066	0.610929
224881_at	VKORC1L1	chr7:65873074-65959563	-0.304134	-0.329863
224893_at	ATL3	chr11:63624087-63671921	0.422244	0.646206
224896_s_at	TTL	chr2:112482156-112541739	-0.28215	-0.457375
224900_at	ANKFY1	chr17:4163821-4263995	0.327921	0.34661
224908_s_at	TTL	chr2:112482156-112541739	-0.378652	-0.514491
224909_s_at	PREX1	chr20:48624252-48827999	0.450295	0.812708
224925_at	PREX1	chr20:48624252-48827999	0.404074	0.71585
224951_at	CERS5	chr12:50129289-50167533	0.315804	0.349775
224953_at	YIPF5	chr5:144158162-144170714	-0.77333	-1.04884
224955_at	TEAD1	chr11:12674421-12944737	0.791828	0.667699
224967_at	UGCG	chr9:111896814-111935369	-0.306308	-0.322667
224970_at	NFIA	chr1:60865259-61462788	0.590791	0.851163
224976_at	NFIA	chr1:60865259-61462788	0.374769	0.505402
224990_at	SMIM14	chr4:39546336-39638902	-0.302097	-0.451254
225023_at	GOPC	chr6:117560269-117602542	-0.343721	-0.416664
225048_at	PHF10	chr6:169703902-169725566	0.326175	0.433416
225052_at	TMEM203	chr9:137204082-137205648	-0.364	-0.438488
225064_at	RABEP1	chr17:5282265-5386340	-0.465648	-0.420992
225071_at	NUS1	chrX:47512602-47513483	-0.335526	-0.352802
225077_at	CHD2	chr15:92886203-93027996	0.427343	0.396978
225085_at	USP40	chr2:233475526-233566782	0.415011	0.502109
225088_at	CEP20	chr16:15959575-15982460	-0.489412	-0.444729
225092_at	RABEP1	chr17:5282265-5386340	-0.306038	-0.432669
225097_at	HIPK2	chr7:139561570-139777998	0.673879	1.21311
225101_s_at	SNX14	chr6:85504776-85594156	-0.434963	-0.446208
225115_at	HIPK2	chr7:139561570-139777998	0.917814	1.35003
225117_at	KANSL1	chr17:45871009-46068204	0.356283	0.392864
225144_at	BMPR2	chr2:202376327-202567751	-0.305692	-0.484701
225150_s_at	RTKN	chr2:74425835-74442422	0.621955	1.06415
225186_at	RAPH1	chr2:203394345-203535335	-0.630951	-0.723553
225202_at	RHOBTB3	chr5:95713522-95824383	0.678494	1.0567
225214_at	LOC100129034	chr9:127119434-127121465	0.321371	0.526725
225219_at	SMAD5	chr5:136132845-136188747	0.619359	0.600377
225222_at	MFSD14A	chr1:99970011-100083321	-0.285031	-0.31675
225259_at	RAB6B	chr3:133824235-133895882	-0.426216	-0.685499
225270_at	NEO1	chr15:73051710-73305205	0.467629	0.485398
225273_at	WWC3	chrX:10015254-10144474	0.694904	0.713691
225299_at	MYO5B	chr18:49822789-50195164	-0.335857	-0.365946
225338_at	ZYG11B	chr1:52726453-52827336	-0.300304	-0.465832
225359_at	DNAJC19	chr3:180983697-180989774	-0.370577	-0.42669
225368_at	HIPK2	chr7:139561570-139777998	0.49557	1.02343
225388_at	TSPAN5	chr4:98470367-98658611	-0.4284	-0.951498
225391_at	LOC93622	chr4:6663396-6676755	-0.296035	-0.320503
225439_at	NUDCD1	chr8:109240919-109334121	-0.385219	-0.448182
225442_at	DDR2	chr1:162631373-162787405	0.391789	0.621547
225446_at	BRWD1	chr21:39184176-39321559	-0.606712	-0.746215
225448_at	NAPG	chr18:10525905-10552764	-0.333895	-0.395977
225455_at	TADA1	chr1:166856510-166876264	-0.32405	-0.427923
225474_at	MAGI1	chr3:65353525-66038834	-0.399886	-0.512932
225490_at	ARID2	chr12:45729706-45908040	0.289152	0.329698
225504_at	HMBOX1	chr8:28890395-29064764	0.293957	0.532472
225511_at	GPRC5B	chr16:19856691-19886167	0.590262	0.723035
225522_at	AAK1	chr2:69457997-69674349	0.474922	0.484363
225537_at	TRAPPC6B	chr14:39147811-39170532	-0.612228	-0.777173
225545_at	EEF2K	chr16:22236992-22300052	0.302889	0.362595
225546_at	EEF2K	chr16:22236992-22300052	0.479014	0.442191
225558_at	GIT2	chr12:109929804-109996389	0.36767	0.35243
225576_at	GINM1	chr6:149566294-149591748	0.336786	0.481408
225591_at	FBXO25	chr8:406428-477967	-0.265381	-0.440494
225627_s_at	CACHD1	chr1:64470129-64693058	0.471038	0.528655
225655_at	UHRF1	chr12:20551590-20553012	0.319711	0.687139
225660_at	SEMA6A	chr5:116443555-116574823	0.548742	0.745435
225665_at	MAP3K20	chr2:174090196-174091874	0.536891	0.825568
225689_at	POMGNT2	chr3:43079229-43106085	-0.284742	-0.42155
225717_at	LNPK	chr2:176790939-176866977	-0.630193	-0.714497
225726_s_at	PLEKHH1	chr14:67533290-67589612	0.760941	1.34228
225727_at	PLEKHH1	chr14:67533290-67589612	0.787455	1.3459
225739_at	RAB11FIP4	chr17:31391675-31538211	-0.35688	-0.412874
225749_at	C16orf91	chr16:1419752-1420756	-0.355486	-0.383643
225757_s_at	CLMN	chr14:95181940-95319908	0.326623	0.505289
225788_at	RRP36	chr6:43021623-43034156	-0.310139	-0.399574
225798_at	JAZF1	chr7:27830573-28180795	-0.445947	-0.629638
225800_at	JAZF1	chr7:27830573-28180795	-0.790314	-0.829187
225810_at	MTMR10	chr15:30938941-30991628	0.458984	0.589386
225816_at	JADE1	chr4:128809700-128875224	0.430587	0.415468
225817_at	CGNL1	chr15:57375967-57550717	0.527865	0.611504
225841_at	HENMT1	chr1:108648290-108661526	-0.391531	-0.568181
225906_at	CASTOR2	chr7:74443749-74445631	0.307678	0.388482
225917_at	ATF7IP	chr12:14365676-14502931	0.315671	0.365625
225918_at	GLG1	chr16:74447427-74607144	0.397023	0.524932
225921_at	NIN	chr14:50719763-50831162	0.335012	0.43409
225928_at	VTI1B	chr14:67647085-67674820	-0.279759	-0.484854
225930_at	NKIRAS1	chr3:23889951-23946591	-0.375102	-0.491235
225936_at	EID2	chr19:39538707-39540161	-0.499768	-0.411135
225941_at	EIF4E3	chr3:71675414-71754773	-0.364641	-0.392611
225959_s_at	ZNRF1	chr16:74999024-75110994	-0.394092	-0.410742
226031_at	VPS50	chr7:93232340-93361123	-0.305043	-0.526561
226040_at	TRIM56	chr7:101085481-101097967	0.447236	0.659532
226046_at	MAPK8	chr10:48306639-48439360	-0.759579	-0.770897
226047_at	IRAG1	chr11:10594637-10597325	0.578248	0.737425
226052_at	BRD4	chr19:15235519-15332545	0.27047	0.312424
226055_at	ARRDC2	chr19:18001132-18014102	0.316496	0.40998
226092_at	PALS1	chr14:67800582-67802536	0.283098	0.379521
226114_at	ZNF436	chr1:23366912-23377300	-0.264422	-0.476845
226139_at	CCDC149	chr4:24803514-24980204	0.347431	0.271054
226167_at	SYT7	chr11:61513714-61581148	0.421577	0.642629
226171_at	ZDHHC3	chr3:44915257-44976185	0.310623	0.422695
226176_s_at	USP42	chr7:6104949-6161564	0.471141	0.602323
226184_at	FMNL2	chr2:152335174-152649826	0.547278	0.628921
226250_at	ZBTB20	chr3:114314500-115147292	0.473828	0.642031
226252_at	ZBTB20	chr3:114314500-115147292	0.499314	0.583433
226255_at	ZBTB33	chrX:120250752-120258398	0.373963	0.513065
226264_at	SUSD1	chr9:112040783-112175297	-0.389622	-0.465492
226265_at	QSER1	chr11:32892811-32993316	0.506724	0.689405
226267_at	JDP2	chr14:75427716-75474111	0.443121	0.418247
226271_at	GDAP1	chr8:74320613-74518007	-0.477719	-0.742222
226287_at	CCDC34	chr11:27330827-27363234	-0.425951	-0.422927
226289_at	CAPRIN1	chr11:34051731-34102610	-0.567604	-0.593003
226331_at	BBX	chr3:107522936-107811339	0.584174	0.744584
226339_at	TRUB1	chr10:114938195-114977676	-0.320484	-0.302667
226341_at	OTUD6B-AS1	chr8:91059318-91070583	-0.702439	-0.58488
226342_at	SPTBN1	chr2:54456317-54671446	0.693859	1.11889
226374_at	CXADR	chr21:17513043-17593579	-0.331311	-0.475886
226432_at	ETNK1	chr12:22625075-22690665	-0.573674	-0.860271
226443_at	PABIR1	chr9:71394973-71396672	-0.270578	-0.441874
226446_at	HES6	chr2:238238267-238240662	0.370003	0.403486
226450_at	INSR	chr19:7112255-7294414	0.327509	0.390743
226490_at	NHSL1	chr6:138422043-138692571	0.660086	0.934096
226507_at	PAK1	chr11:77322017-77474635	-0.382397	-0.728826
226547_at	KAT6A	chr8:41929479-42051994	0.461893	0.51777
226580_at	BRMS1L	chr14:35826338-35932325	-0.474952	-0.506334
226586_at	ANKS6	chr9:98731329-98796965	0.358166	0.265657
226612_at	UBE2QL1	chr5:6448859-6496723	-0.286265	-0.450356
226626_at	THOC2	chrX:123600561-123733056	0.388764	0.450501
226638_at	ARHGAP23	chr17:38229196-38313162	0.26615	0.396675
226651_at	HOMER1	chr5:79372636-79514134	-0.381737	-0.630731
226656_at	CRTAP	chr3:33114014-33147773	0.270731	0.485252
226686_at	CISD2	chr22:16405330-16405417	-0.570702	-0.510707
226690_at	ADCYAP1R1	chr7:31052308-31111474	0.476018	0.625686
226692_at	SERF2	chr15:43796142-43804427	0.337532	0.331533
226775_at	ENY2	chr8:109334324-109345954	-0.374909	-0.344437
226794_at	STXBP5	chr6:147204180-147391010	-0.478031	-0.758797
226801_s_at	AIDA	chr1:222668013-222713210	0.478825	0.719244
226819_at	LSM11	chr5:157743712-157760709	-0.351066	-0.526089
226831_at	SLC25A46	chr5:110738136-110765161	-0.339199	-0.397749
226881_at	GRPEL2	chr5:149345430-149354583	-0.326948	-0.499144
226899_at	UNC5B	chr10:71212570-71302864	0.28799	0.58309
226907_at	PPP1R14C	chr6:150143044-150250392	-0.465867	-0.8137
226913_s_at	SOX8	chr16:981770-986979	0.61674	0.898257
226916_x_at	DPP9	chr19:4674341-4724673	0.308205	0.426264
226927_at	C12orf73	chr12:103940763-103965708	-0.381538	-0.386306
226932_at	SSPN	chr12:26121991-26299290	0.65158	0.83279
226963_at	BTF3L4	chr2:159003975-159004320	-0.529745	-0.765098
226964_at	TTBK2	chr15:42738730-42920809	0.398669	0.390875
226972_s_at	CCDC136	chr7:128790757-128822132	-0.453957	-0.779866
226981_at	KMT2A	chr11:118436456-118526832	0.621963	0.465148
226996_at	LCLAT1	chr2:30447226-30644225	-0.307053	-0.462963
227003_at	RAB28	chr4:13361354-13484365	0.278077	0.434236
227004_at	CDKL5	chrX:18425583-18653629	-0.623362	-0.930339
227012_at	SLC25A40	chr7:87833568-87876360	-0.646633	-0.564477
227015_at	ASPHD2	chr22:26429260-26445015	-0.325924	-0.652135
227018_at	DPP8	chr15:65442463-65517704	-0.409193	-0.491199
227064_at	ANKRD40	chr17:50693198-50707914	0.482788	0.809804
227068_at	PGK1	chrX:77910739-78129295	-0.512829	-0.5565
227080_at	ZNF697	chr1:119619377-119648266	-0.574354	-0.692398
227082_at	ZBTB20	chr3:114314501-114329714	0.690543	0.970212
227084_at	DTNA	chr18:34493291-34891844	0.730427	1.0546
227087_at	INPP4A	chr2:98444854-98594392	-0.263506	-0.359168
227121_at	ZBTB20	chr3:114314501-114329714	0.596278	0.739988
227155_at	LMO4	chr1:87328880-87348923	-0.434668	-0.778345
227156_at	CASK	chrX:41514934-41923554	-0.508308	-0.398408
227160_s_at	NDUFAF5	chr20:13785007-13821580	-0.364617	-0.403808
227166_at	DNAJC18	chr5:139408588-139444491	-0.511056	-0.597156
227176_at	SLC2A13	chr12:39755025-40106089	-0.32104	-0.296392
227179_at	STAU2	chr8:73420369-73747708	-0.424846	-0.451786
227180_at	ELOVL7	chr5:60751791-60844274	0.932689	0.979316
227191_at	ITFG1	chr16:47154387-47464149	-0.571166	-0.591007
227209_at	CNTN1	chr12:40692439-41072415	-0.485176	-0.737442
227275_at	MEX3C	chr18:48703120-48723051	-0.355516	-0.407695
227308_x_at	LTBP3	chr11:65538559-65558930	0.283628	0.421518
227318_at	TMEM178B	chr7:141074064-141480380	-0.443684	-0.736891
227334_at	USP54	chr10:73497538-73626117	0.512423	0.791106
227351_at	MOSMO	chr16:22094667-22095970	-0.304327	-0.46235
227375_at	ANKRD13C	chr1:70258999-70354734	-0.556728	-0.592889
227382_at	CYB5B	chr16:69463844-69466264	-0.560076	-0.998619
227401_at	IL17D	chr13:20702127-20723098	0.49663	0.629153
227408_s_at	SNX25	chr4:185204237-185370185	-0.310764	-0.358254
227444_at	ARMCX4	chrX:101418287-101533459	-0.438728	-0.627686
227449_at	EPHA4	chr2:221418027-221574202	-0.433776	-0.996537
227461_at	STON2	chr14:81260652-81436465	0.674734	0.957888
227528_s_at	KMT2D	chr12:49018975-49060794	0.444748	0.489229
227562_at	LAMTOR3	chr4:99878336-99894428	-0.318444	-0.580775
227606_s_at	STAMBPL1	chr10:88879734-88975153	-0.409653	-0.502755
227611_at	TARS3	chr15:102193954-102215943	0.279502	0.489568
227658_s_at	PLEKHA3	chr2:41521043-41521989	-0.538445	-0.526577
227669_at	MPC2	chr1:167916675-167937072	-0.46081	-0.50045
227698_s_at	RAB40C	chr16:589357-629272	-0.302207	-0.40402
227705_at	TCEAL7	chrX:103330229-103332326	-0.552156	-0.47015
227755_at	ERN1	chr17:64039080-64130819	0.30266	0.423484
227771_at	LIFR	chr5:38474668-38608354	0.488717	0.621298
227803_at	ENPP5	chr6:46159185-46170980	-0.582101	-0.665533
227824_at	PRKCB	chr16:23835983-24220611	-1.18824	-1.8063
227830_at	GABRB3	chr15:26543552-26939539	-0.465417	-0.820235
227870_at	IGDCC4	chr15:65381484-65422947	0.895948	1.26678
227960_s_at	FAHD1	chr16:1826967-1840207	-0.484903	-0.475388
228019_s_at	MRPS18C	chr4:83455932-83469735	-0.398141	-0.334865
228109_at	RASGRF2	chr5:80960363-81230162	-0.758612	-1.38187
228135_at	C1orf52	chr1:85249953-85259672	-0.388549	-0.312755
228146_at	LINC02693	chr17:21107274-21438790	-0.313796	-0.467948
228159_at	WDFY2	chr13:51584455-51767709	0.337099	0.385267
228310_at	ENAH	chr1:225486765-225653142	0.351918	0.539051
228368_at	ARHGAP20	chr11:110577042-110713189	-0.711272	-1.00066
228378_at	C12orf29	chr12:88033846-88050160	-0.646482	-0.753742
228401_at	ATAD2	chr8:123319850-123416350	0.393439	0.611271
228457_at	PPM1L	chr3:160755602-161078902	-0.453918	-0.554747
228488_at	TBC1D16	chr17:79932343-80035872	0.357015	0.499538
228501_at	GALNT15	chr3:16174680-16231992	0.63139	0.915436
228549_at	TMEM63A	chr1:225840883-225846522	0.275607	0.537431
228561_at	CDC37L1	chr9:4679559-4708399	-0.380337	-0.401301
228598_at	DPP10	chr2:114442299-115845780	-0.521211	-0.515259
228680_at	KIF3A	chr5:132692628-132737638	-0.265075	-0.357303
228695_at	VXN	chr8:67405644-67429216	-0.977207	-1.05179
228701_at	VXN	chr8:67405644-67429216	-0.847683	-0.863055
228709_at	TPR	chr1:186311652-186375693	-0.378595	-0.358397
228711_at	ZNF37A	chr10:38094334-38150293	0.363228	0.558849
228745_at	SGTB	chr5:65665928-65723035	-0.342899	-0.533406
228775_at	EMC3	chr3:9962682-10011202	-0.323393	-0.596222
228795_at	PRKCB	chr16:23835983-24220611	-0.779757	-1.42777
228824_s_at	PTGR1	chr9:111549722-111599893	-0.419666	-0.920521
228851_s_at	ENSA	chr14:82692704-82693055	-1.01012	-0.973352
228911_at	ADAMTS7	chr15:78759206-78811464	0.295954	0.41676
228935_at	SLC4A8	chr12:51391317-51515763	-0.500648	-0.780263
228948_at	EPHA4	chr2:221418027-221574202	-0.630348	-1.524
228981_at	TMEM169	chr2:216081866-216102783	-0.387101	-0.478829
229029_at	CAMK4	chr5:111223653-111494886	-0.647717	-0.934365
229071_at	C17orf100	chr17:6651762-6693202	-0.387656	-0.378906
229083_at	HNRNPA0	chr5:137745651-137754363	-0.595945	-0.716681
229114_at	GAB1	chr4:143336876-143474565	0.75626	1.00978
229201_at	PAK3	chrX:110944285-111227361	-0.331818	-0.338739
229256_at	PGM2L1	chr11:74330316-74398433	-0.420099	-0.409807
229284_at	MAT2B	chr5:162939005-162945971	-0.371423	-0.378669
229300_at	RAB3C	chr5:58582221-58859394	-0.340121	-0.533726
229342_at	NCBP3	chr17:3802158-3846246	0.463048	0.592213
229355_at	UBE2D3	chr4:102794383-102868896	-0.344069	-0.504856
229374_at	EPHA4	chr2:221418027-221574202	-0.697243	-1.31356
229430_at	VXN	chr8:67430042-67430757	-0.317615	-0.263303
229456_s_at	DDAH1	chr1:85786268-85787110	-0.370919	-0.485942
229461_x_at	NEGR1	chr1:71395943-72282539	-0.546449	-0.784352
229497_at	ANKDD1A	chr15:64911902-64958691	0.377632	0.685145
229499_at	CAPN13	chr2:30722771-30820542	-0.332672	-0.386935
229506_at	PPM1L	chr3:160755602-161078902	-0.696673	-0.773196
229523_at	TMEM200C	chr18:5882072-5895955	-0.36717	-0.459169
229526_at	AQP11	chr11:77589391-77610356	-0.350782	-0.388525
229537_at	LMO4	chr1:87328880-87348923	-0.578817	-1.15066
229574_at	TRA2A	chr7:23569473-23569953	0.638554	0.809244
229649_at	NRXN3	chr14:78170373-79868291	-0.299517	-0.492652
229664_at	MAPK8	chr10:48306639-48439360	-0.32183	-0.305897
229676_at	MTPAP	chr10:30629119-30638208	-0.661293	-0.752446
229793_at	ASAH2B	chr10:50182778-50279720	-0.358589	-0.721748
229799_s_at	NCAM1	chr11:112961247-113278436	0.733347	0.948543
229800_at	DCLK1	chr13:35768652-36131382	0.456099	1.04597
229818_at	SVOP	chr12:108907741-109021068	-0.382488	-0.814147
229849_at	WIPF3	chr7:29806486-29917061	0.386615	0.590952
230002_at	GPSM2	chr1:108875350-108934545	0.556246	0.690992
230045_at	CNTN2	chr1:205042937-205078289	0.656917	0.906041
230055_at	KHDC1	chr6:73241314-73310365	-0.359029	-0.418696
230091_at	SRPK2	chr7:105110704-105399308	-0.581602	-0.604996
230100_x_at	PAK1	chr11:77322017-77474635	-0.379608	-0.420526
230117_at	VSTM2A	chr7:54542325-54571080	-0.599247	-0.851183
230135_at	HHIP	chr4:144646156-144745271	0.735511	1.10035
230137_at	SMIM43	chr4:122680087-122681063	-0.582108	-1.20152
230217_at	CLVS1	chr8:61057158-61501645	-0.520291	-0.48553
230231_at	FGF14	chr13:101710804-102402457	-0.395303	-0.535329
230258_at	GLIS3	chr9:3824127-4348392	0.395147	0.532797
230263_s_at	DOCK5	chr8:25184689-25418082	0.90167	1.18403
230352_at	PRPS2	chrX:12841451-12842108	-0.703754	-1.16892
230359_at	KNDC1	chr10:133160219-133226412	0.298924	0.345691
230389_at	FNBP1	chr9:129887187-130043189	0.650924	0.798902
230417_at	GALNT16	chr14:69259277-69357033	0.322472	0.424408
230418_s_at	GALNT16	chr14:69259277-69357033	0.411503	0.694356
230447_at	FAXC	chr6:99271168-99350062	-0.531743	-0.559222
230495_at	LINC01102	chr2:104430130-104532747	-0.406336	-0.563268
230629_s_at	EP400	chr12:131949942-132080460	0.641893	0.572636
230640_at	FMNL3	chr12:49636499-49708165	0.308506	0.32838
230765_at	NWD2	chr4:37244743-37449463	-0.408311	-0.766896
230773_at	ZNF385D	chr3:21412218-22373321	-0.40572	-0.452796
230882_at	DLX6-AS1	chr7:96955141-97014088	-0.616593	-0.490337
230883_at	NXPH2	chr2:138669157-138780390	-0.473873	-0.673179
230923_at	TAFA1	chr3:68593966-68594769	-0.586305	-1.00151
230962_at	DCLK1	chr13:35768652-36131382	-0.5786	-0.793436
230968_at	HDAC9	chr7:18086949-19002416	-0.437493	-0.556458
230988_at	ADD2	chr2:70607618-70768225	-0.389895	-0.469424
231045_x_at	SELENOH	chr11:57509159-57510510	-0.297166	-0.299823
231046_at	LINC01023	chr5:108725707-108728322	0.328955	0.441628
231118_at	ANKRD35	chr1:145866560-145885866	0.27444	0.370007
231186_at	LINC00643	chr14:62075340-62128421	-0.443204	-0.43456
231249_at	SZT2	chr1:43389882-43454247	0.284167	0.352091
231358_at	MRO	chr18:50795120-50825402	0.711694	0.861254
231438_x_at	CDH8	chr16:61647242-62037035	-0.461747	-0.535846
231489_x_at	CREG2	chr2:101345550-101387503	-0.554447	-0.960741
231791_at	ASAH2B	chr10:50182778-50279720	-0.354673	-0.473053
231861_at	LRP10	chr14:22871740-22881713	0.395844	0.45166
231897_at	PTGR1	chr9:111549722-111599893	-0.452198	-0.774419
231918_s_at	GFM2	chr5:74721206-74767147	-0.538062	-0.657432
231929_at	IKZF2	chr2:212999691-213152427	0.488338	0.618302
231930_at	ELMOD1	chr11:107506458-107979159	-0.583304	-0.76393
231935_at	ARPP21	chr3:35638945-35794496	-0.450816	-0.837301
231967_at	PHF20L1	chr8:132775358-132848807	-0.380292	-0.364175
231980_at	DOK6	chr18:69400888-69849087	-0.632025	-0.663979
231982_at	SMIM24	chr19:3473986-3480525	-0.405447	-0.412857
232043_at	GNG7	chr19:2511219-2702694	0.288101	0.588789
232053_x_at	RHBDD2	chr7:75842602-75888926	-0.388861	-0.626066
232062_at	ADCY1	chr7:45574140-45723116	-0.523842	-0.707073
232067_at	FAXC	chr6:99271168-99350062	-0.447575	-0.63122
[truncated: 177 more rows]
