# Supplementary material for: Genome-wide transcriptome profiling and development of age prediction models in the human brain
Source: Aging (Albany NY). 2024 Feb 28;16(5):4075–94. doi: 10.18632/aging.205609 (PMC10968712; doi:10.18632/aging.205609)
Supplement: Supplementary Table 4 [file aging-16-205609-s005.xlsx]

## Sheet: Sheet1
Supplementary Table 4. Overlaps of differentially regulated transcripts between sex the old and elderly categories, related to Figure 1.
Female and Male age 65-84 DEGs overlaps
Probe set	Symbol	Chr. Loc.	logFC Female age65-84	logFC Male age65-84
1552293_at	TMEM196	chr7:19719315-19773617	-0.4042	-0.279813
1552924_a_at	PITPNM2	chr12:122983480-123151090	-0.585016	-0.394419
1553410_a_at	ABCC12	chr16:48080882-48156018	-0.808645	-0.408367
1559526_at	LOC101930421	chr10:628620-631255	0.94267	0.458971
200989_at	HIF1A	chr14:61695513-61748259	0.635843	0.345397
201302_at	ANXA4	chr2:69644425-69827112	0.762741	0.537156
201309_x_at	NREP	chr5:111662621-111997464	-1.07117	-1.17164
201413_at	HSD17B4	chr5:119452465-119637199	0.451474	0.401376
201481_s_at	PYGB	chr20:25248085-25298012	0.427578	0.323945
201651_s_at	PACSIN2	chr22:42835412-43015149	0.403024	0.359918
201924_at	AFF1	chr4:86935002-87141039	0.789013	0.635502
202112_at	VWF	chr12:5948877-6124770	0.883672	0.544832
202545_at	PRKCD	chr3:53156009-53192717	-0.678177	-0.390778
202975_s_at	RHOBTB3	chr5:95713522-95824383	1.11285	0.740197
203038_at	PTPRK	chr6:127968779-128524810	0.537116	0.485215
203367_at	DUSP14	chr17:37494470-37518136	-0.597847	-0.328362
203414_at	MMD	chr17:55392622-55421924	-0.788168	-0.440363
203540_at	GFAP	chr17:44903159-44916937	1.47817	0.900947
203723_at	ITPKB	chr1:226631690-226739323	1.23789	1.00699
203921_at	CHST2	chr3:143119771-143124014	-0.583135	-0.387902
204041_at	MAOB	chrX:43766610-43882450	0.711994	0.365442
204723_at	SCN3B	chr11:123629187-123655244	-0.805821	-0.462973
205591_at	OLFM1	chr9:135075422-135121180	-0.647565	-0.526093
205625_s_at	CALB1	chr8:90058608-90095475	-1.42871	-1.51905
205626_s_at	CALB1	chr8:90058608-90095475	-1.37944	-1.50595
205630_at	CRH	chr8:66176376-66178464	-2.13608	-1.17482
205874_at	ITPKA	chr15:41493393-41503551	-0.691376	-0.370824
205901_at	PNOC	chr8:28316986-28343355	-0.755932	-0.691965
206023_at	NMU	chr4:55595229-55636698	-0.826597	-0.736975
206084_at	PTPRR	chr12:70638073-70920738	-0.776387	-0.462302
206208_at	CA4	chr17:60149942-60170899	-0.846643	-0.375144
206209_s_at	CA4	chr17:60149942-60170899	-1.01533	-0.637478
206577_at	VIP	chr6:152750797-152759765	-1.47003	-1.18799
206850_at	RASL10A	chr22:29312933-29319679	-0.681272	-0.359856
207453_s_at	DNAJB5	chr9:34989641-34998900	-0.869327	-0.397158
208116_s_at	MAN1A1	chr6:119177205-119349761	-0.879014	-0.588552
208877_at	PAK2	chr3:196739857-196832647	0.590856	0.490595
209869_at	ADRA2A	chr10:111077029-111080907	-0.769136	-0.608488
210182_at	CORT	chr1:10430102-10452153	-0.679157	-0.328735
210675_s_at	PTPRR	chr12:70638073-70920738	-0.908794	-0.683669
210817_s_at	CALCOCO2	chr17:48831018-48866522	0.619143	0.332282
212233_at	MAP1B	chr5:72107234-72209565	0.394409	0.295421
212274_at	LPIN1	chr2:11677595-11827409	0.571188	0.558222
212586_at	CAST	chr5:96525267-96779595	0.544134	0.437289
212875_s_at	C2CD2	chr21:41885112-41954018	0.492062	0.346586
213096_at	TMCC2	chr1:205227946-205285632	0.430541	0.415061
213131_at	OLFM1	chr9:135075422-135121180	-0.589455	-0.293138
213325_at	NECTIN3	chr3:111070071-111275563	-1.12091	-1.06072
213327_s_at	USP12	chr13:27066156-27171811	-0.400561	-0.342509
213496_at	PLPPR4	chr1:99264292-99309590	-0.799086	-0.602061
213791_at	PENK	chr8:56436674-56446671	-0.996766	-0.906202
213925_at	STUM	chr1:226548764-226609230	-0.865356	-0.423778
214811_at	RIMBP2	chr12:130396133-130768228	-0.735507	-0.499843
216048_s_at	RHOBTB3	chr5:95713522-95824383	1.08511	0.665677
218623_at	NSG2	chr5:174045706-174243501	-0.567545	-0.473639
218866_s_at	POLR3K	chr16:46407-53608	-0.511506	-0.491784
218868_at	ACTR3B	chr7:152759749-152855378	-0.634212	-0.637588
218888_s_at	NETO2	chr16:47077703-47143945	-1.0136	-0.624318
219752_at	RASAL1	chr12:113098819-113136239	-0.453408	-0.304207
219939_s_at	CSDE1	chr1:114716913-114758676	0.537023	0.353277
220331_at	CYP46A1	chr14:99684298-99727301	-0.635454	-0.293322
220889_s_at	CA10	chr17:51630313-52160017	-0.753446	-0.8126
221904_at	FAM131A	chr3:184335926-184348421	-0.703579	-0.497981
222473_s_at	ERBIN	chr5:65883128-66082546	1.06831	0.768552
222774_s_at	NETO2	chr16:47077703-47143945	-1.23694	-0.89375
223383_at	ZNRF1	chr16:74999024-75110994	-0.634815	-0.37213
223913_s_at	MIR7-3HG	chr19:4769031-4785077	-1.01693	-0.527291
224818_at	SORT1	chr1:109309568-109397918	0.403423	0.329395
224840_at	FKBP5	chr6:35573585-35728583	1.78444	1.27952
224856_at	FKBP5	chr6:35573585-35728583	1.48564	0.991947
224896_s_at	TTL	chr2:112482156-112541739	-0.479058	-0.28215
224908_s_at	TTL	chr2:112482156-112541739	-0.631224	-0.378652
225202_at	RHOBTB3	chr5:95713522-95824383	1.25012	0.678494
225739_at	RAB11FIP4	chr17:31391675-31538211	-0.473472	-0.35688
227015_at	ASPHD2	chr22:26429260-26445015	-0.542298	-0.325924
227408_s_at	SNX25	chr4:185204237-185370185	-0.54095	-0.310764
228135_at	C1orf52	chr1:85249953-85259672	-0.405993	-0.388549
228368_at	ARHGAP20	chr11:110577042-110713189	-0.863491	-0.711272
228501_at	GALNT15	chr3:16174680-16231992	1.12119	0.63139
229430_at	VXN	chr8:66432486-66518524	-0.394852	-0.317615
229799_s_at	NCAM1	chr11:112961247-113278436	0.749294	0.733347
230755_at	RHBDL3	chr17:32265832-32324659	0.582848	0.59583
230765_at	NWD2	chr4:37244743-37449463	-0.862317	-0.408311
230923_at	TAFA1	chr3:68004247-68545621	-0.773152	-0.586305
231186_at	LINC00643	chr14:62075340-62128421	-0.528644	-0.443204
231935_at	ARPP21	chr3:35638945-35794496	-0.680871	-0.450816
232914_s_at	SYTL2	chr11:85694224-85811159	-0.454665	-0.29739
233487_s_at	LRRC8A	chr9:128882133-128918039	0.507306	0.400395
235591_at	SSTR1	chr14:38207904-38213067	-0.845535	-0.907943
236361_at	GALNT15	chr3:16174680-16231992	0.944485	0.553333
236377_at	TMEM132D	chr12:129071725-129904025	-0.524429	-0.600294
244675_at	RGS8	chr1:182641816-182684587	-0.811555	-0.494668
823_at	CX3CL1	chr16:57372477-57385044	-0.672432	-0.312231
Female and Male age 85-105 DEGs overlaps
Probe set	Symbol	Chr. Loc.	logFC Female age 85-105	logFC Male age 85-105
1552264_a_at	MAPK1	chr22:21759657-21867680	-0.709222	-1.00398
1552293_at	TMEM196	chr7:19719315-19773617	-0.373728	-0.392944
1552658_a_at	NAV3	chr12:77324641-78213010	-0.59952	-0.742986
1552722_at	ARPP21	chr3:35638945-35794496	-1.70978	-1.95744
1552924_a_at	PITPNM2	chr12:122983480-123151090	-0.525415	-0.544902
1553185_at	RASEF	chr9:85669997-85678092	1.17381	1.40541
1553186_x_at	RASEF	chr9:85669997-85678092	1.11697	1.34505
1553510_s_at	CNOT9	chr2:219445282-219458999	-0.370148	-0.463127
1553535_a_at	RANGAP1	chr22:41244779-41286187	-0.505961	-0.637631
1553864_at	GPR26	chr10:123666355-123697399	-1.24273	-1.55145
1553865_a_at	GPR26	chr10:123666355-123697399	-0.846701	-0.821725
1554112_a_at	ULK2	chr17:19770829-19867936	-0.433248	-0.407419
1554239_s_at	ZADH2	chr18:75195113-75209139	-0.333861	-0.307781
1554321_a_at	NFS1	chr20:35668052-35699355	-0.491842	-0.457395
1554333_at	DNAJA4	chr15:78264086-78282196	-1.05036	-1.22202
1554334_a_at	DNAJA4	chr15:78264086-78282196	-0.651862	-0.649993
1554443_s_at	BEST1	chr11:61950063-61965515	0.355512	0.387496
1554500_a_at	RGS7	chr1:240767636-241357374	-1.13644	-1.31337
1554509_a_at	MINDY3	chr10:15820852-15902497	-0.443084	-0.758312
1554510_s_at	GHITM	chr10:84139482-84154841	-0.382191	-0.693803
1554524_a_at	OLFM3	chr1:101802560-101996926	-0.631175	-0.681011
1554539_a_at	RHOF	chr12:121777754-121803403	-0.394254	-0.439831
1554633_a_at	MYT1L	chr2:1789113-2331664	-1.38194	-1.90807
1554679_a_at	LAPTM4B	chr8:97775057-97853013	-0.606102	-0.645717
1554689_a_at	NLGN4X	chrX:5840637-6228867	-0.605478	-0.546013
1554757_a_at	INPP5A	chr10:132537787-132783480	-0.703576	-0.736534
1554758_a_at	CD99L2	chrX:150766336-150898816	-0.714744	-0.547904
1555098_a_at	CACNB2	chr10:18140424-18543557	-0.74514	-0.871394
1555202_a_at	RPRD1A	chr18:35984387-36067576	-0.581833	-0.820982
1555388_s_at	SNX25	chr4:185204237-185370185	-0.381876	-0.337697
1555461_at	TXNL4A	chr18:79970813-80033949	-0.635683	-0.528874
1555487_a_at	ACTR3B	chr7:152759749-152855378	-0.904052	-0.776542
1555611_s_at	MBD1	chr18:50266882-50281774	-0.43349	-0.349797
1555618_s_at	SAE1	chr19:47113274-47210636	-0.740721	-0.972125
1555702_a_at	ST3GAL3	chr1:43650149-43931014	-0.378736	-0.344793
1555797_a_at	ARPC5	chr1:183620846-183635783	-0.618712	-0.562221
1556619_at	SHISA9	chr16:12901598-13240416	-0.418304	-0.463875
1557180_at	C11orf87	chr11:109422190-109429167	-1.20519	-1.37833
1557181_s_at	C11orf87	chr11:109422190-109429167	-0.887126	-1.52226
1557475_at	LINC00507	chr12:127914707-127960028	-1.19479	-1.19974
1557910_at	HSP90AB1	chr6:44246166-44253888	-0.881063	-0.821302
1558136_s_at	TAF11	chr6:34877462-34889192	-0.544691	-0.369375
1559633_a_at	CHRM3	chr1:239386565-239915452	-1.13165	-1.25537
1560587_s_at	PRDX5	chr11:64318121-64321811	-0.435365	-0.478444
1560659_at	LINC00342	chr2:95807051-95835568	0.531963	0.481626
1560661_x_at	LINC00342	chr2:95807051-95835568	0.55937	0.488103
1560692_at	VSTM2A-OT1	chr7:54556970-54571726	-0.776025	-1.05578
1568618_a_at	GALNT1	chr18:35581117-35711834	-0.44275	-0.392681
1569905_at	HSD11B1L	chr19:5680604-5688523	-0.477481	-0.317483
200052_s_at	ILF2	chr1:153661788-153671028	-0.418472	-0.341796
200068_s_at	CANX	chr5:179679612-179732514	0.302169	0.343527
200078_s_at	ATP6V0B	chr1:43974487-43978295	-0.642664	-0.349926
200604_s_at	PRKAR1A	chr17:68511780-68551319	-0.748961	-0.740927
200613_at	AP2M1	chr3:184174689-184184214	-0.354734	-0.405092
200630_x_at	SET	chr9:128683424-128696400	0.509905	0.763919
200638_s_at	YWHAZ	chr8:100916523-100953388	-0.513179	-0.574164
200640_at	YWHAZ	chr8:100916523-100953388	-0.316941	-0.265447
200641_s_at	YWHAZ	chr10:23136924-23137661	-0.966724	-1.05769
200686_s_at	SRSF11	chr1:70205682-70253052	0.570211	0.39213
200696_s_at	GSN	chr9:121207794-121332843	0.906721	0.669399
200739_s_at	SUMO3	chr21:44805617-44818779	-0.585283	-0.501078
200749_at	RAN	chr12:130872037-130877678	-0.344358	-0.487899
200802_at	SARS1	chr1:109756539-109780736	-0.418251	-0.456249
200820_at	PSMD8	chr19:38374563-38383850	-0.511559	-0.544054
200849_s_at	AHCYL1	chr1:109984765-110023742	0.776252	0.67408
200850_s_at	AHCYL1	chr1:109984765-110023742	0.684776	0.631868
200853_at	H2AZ1	chr4:100869242-100871431	-0.40525	-0.58042
200877_at	CCT4	chr2:61868085-61888671	-0.315503	-0.395649
200880_at	DNAJA1	chr9:33025273-33039907	-0.460323	-0.461983
200881_s_at	DNAJA1	chr9:33025273-33039907	-0.72874	-0.598755
201048_x_at	RAB6A	chr11:73675638-73761137	-0.868933	-1.34226
201054_at	HNRNPA0	chr5:137745651-137754363	-0.372525	-0.570273
201056_at	GOLGB1	chr3:121663199-121749966	0.354252	0.278169
201078_at	TM9SF2	chr13:99446311-99564048	-0.298572	-0.561764
201192_s_at	PITPNA	chr17:1517718-1562792	-0.481541	-0.65039
201207_at	TNFAIP1	chr17:28335602-28347009	-0.283218	-0.28607
201221_s_at	SNRNP70	chr19:49085419-49108605	0.552079	0.463451
201237_at	CAPZA2	chr7:116811070-116922049	-0.585822	-1.01681
201238_s_at	CAPZA2	chr7:116811070-116922049	-0.514062	-0.741433
201245_s_at	OTUB1	chr11:63985853-64001811	-0.569338	-0.497424
201267_s_at	PSMC3	chr11:47418769-47426473	-0.390415	-0.467466
201284_s_at	APEH	chr3:49674014-49683971	-0.368844	-0.387147
201296_s_at	WSB1	chr17:27294076-27315926	1.07778	1.06351
201302_at	ANXA4	chr2:69644425-69827112	0.728826	0.847295
201309_x_at	NREP	chr5:111662621-111997464	-1.10761	-1.43254
201310_s_at	NREP	chr5:111662621-111997464	-0.490233	-0.686386
201336_at	VAMP3	chr1:7771296-7781432	0.691029	0.879287
201341_at	ENC1	chr5:74627406-74641424	-0.370002	-0.460492
201345_s_at	UBE2D2	chr5:139526431-139628434	-0.348524	-0.344596
201364_s_at	OAZ2	chr15:64687573-64703281	-0.30724	-0.29749
201373_at	PLEC	chr8:143915153-143976734	0.292513	0.401028
201435_s_at	EIF4E	chr4:98879276-98929133	-0.460655	-0.624848
201520_s_at	GRSF1	chr4:70815783-70839897	-0.363808	-0.395149
201537_s_at	DUSP3	chr17:43766125-43778977	-0.567983	-0.607368
201538_s_at	DUSP3	chr17:43766125-43778977	-0.660829	-0.663471
201613_s_at	AP1G2	chr14:23559565-23568070	0.604973	0.455665
201629_s_at	ACP1	chr2:264140-278283	-0.713007	-0.695439
201659_s_at	ARL1	chr12:101393116-101407772	-0.406871	-0.419762
201674_s_at	AKAP1	chr17:57085092-57121346	0.368786	0.470586
201705_at	PSMD7	chr16:74296814-74306288	-0.470099	-0.669926
201739_at	SGK1	chr6:134169248-134318112	0.875453	1.0979
201749_at	ECE1	chr1:21217247-21345572	0.332111	0.372548
201821_s_at	TIMM17A	chr1:201955503-201970664	-0.839463	-1.07307
201878_at	ARIH1	chr15:72474330-72602987	-0.297256	-0.295434
201881_s_at	ARIH1	chr15:72474330-72602987	-0.431991	-0.491395
201924_at	AFF1	chr4:86935002-87141039	0.705839	0.758577
201939_at	PLK2	chr5:58453982-58460139	-0.477981	-0.845972
201946_s_at	CCT2	chr12:69585426-69601570	-0.541758	-0.592817
201966_at	NDUFS2	chr1:161197104-161214723	-0.317337	-0.310934
201979_s_at	PPP5C	chr19:46347087-46392981	-0.309591	-0.297456
202058_s_at	KPNA1	chr3:122421902-122514945	-0.565071	-0.469126
202143_s_at	COPS8	chr2:237085882-237100474	-0.563863	-0.625828
202213_s_at	CUL4B	chrX:120505920-120604074	-0.527979	-0.640361
202219_at	SLC6A8	chrX:153687926-153696588	0.55732	0.804851
202272_s_at	FBXO28	chr1:224114111-224162047	-0.363295	-0.372802
202308_at	SREBF1	chr17:17813480-17813545	0.528562	0.573916
202360_at	MAML1	chr5:179733695-179778170	0.453138	0.444749
202364_at	MXI1	chr10:110207605-110287365	0.542894	0.713242
202432_at	PPP3CB	chr10:73436433-73496024	-0.478578	-0.493165
202467_s_at	COPS2	chr15:49106068-49155661	-0.277728	-0.279523
202498_s_at	SLC2A3	chr12:7919230-7936187	-0.68323	-0.521097
202506_at	ITPRID2	chr2:182783586-182795252	0.618504	0.753403
202511_s_at	ATG5	chr6:106045423-106325791	-0.414767	-0.342915
202524_s_at	SPOCK2	chr10:72059034-72089032	0.342714	0.452899
202539_s_at	HMGCR	chr5:75336329-75364001	-0.690211	-0.822761
202558_s_at	HSPA13	chr21:14371115-14383484	-0.851725	-1.03154
202593_s_at	GDE1	chr16:19501693-19522123	-0.621111	-0.52653
202614_at	SLC30A9	chr4:41990502-42090461	-0.50353	-0.523581
202640_s_at	RANBP3	chr19:5916139-5978142	0.279267	0.395718
202736_s_at	LSM4	chr19:18306236-18323112	-0.37995	-0.350488
202775_s_at	SFSWAP	chr12:131711081-131799738	0.461541	0.519255
202822_at	LPP	chr3:188153284-188890671	0.474776	0.556051
202824_s_at	ELOC	chr8:74858846-74872053	-0.294768	-0.269927
202872_at	ATP6V1C1	chr8:103021063-103073051	-0.496947	-0.56115
202873_at	ATP6V1C1	chr8:103021063-103073051	-0.786461	-1.17505
202874_s_at	ATP6V1C1	chr8:103021063-103073051	-0.637989	-0.714097
202887_s_at	DDIT4	chr10:72273919-72276036	1.05101	1.00525
202915_s_at	FAM20B	chr1:179025804-179076567	-0.429241	-0.405155
202927_at	PIN1	chr19:9835257-9849689	-0.430789	-0.482498
202962_at	KIF13B	chr8:29067278-29263124	0.383566	0.414558
202975_s_at	RHOBTB3	chr5:95713522-95824383	1.16293	1.05676
202976_s_at	RHOBTB3	chr5:95713522-95824383	1.02357	1.10946
203038_at	PTPRK	chr6:127968779-128524810	0.442103	0.332951
203080_s_at	BAZ2B	chr2:159318979-159616569	0.717109	0.851193
203087_s_at	KIF2A	chr5:62306162-62391025	-0.470619	-0.449506
203158_s_at	GLS	chr2:190880821-190965552	-0.892514	-1.28587
203225_s_at	RFK	chr9:76385526-76394517	-0.514992	-0.350025
203234_at	UPP1	chr7:48088628-48108736	0.462905	0.463815
203263_s_at	ARHGEF9	chrX:63634967-63809274	-0.832495	-0.842005
203265_s_at	MAP2K4	chr17:12020829-12143830	-0.802078	-1.12492
203269_at	NSMAF	chr8:58583508-58659853	0.54219	0.393845
203272_s_at	TUSC2	chr3:50320027-50328251	-0.685537	-0.363989
203301_s_at	DMTF1	chr7:87152409-87196337	0.427468	0.334579
203352_at	ORC4	chr2:147930396-148021604	-0.521011	-0.447176
203367_at	DUSP14	chr17:37494470-37518136	-0.433613	-0.413572
203389_at	KIF3C	chr2:25926598-25982749	-0.315299	-0.390573
203484_at	SEC61G	chr7:54752250-54759974	-0.287864	-0.400446
203540_at	GFAP	chr17:44903159-44916937	1.0455	1.12542
203549_s_at	LPL	chr8:19901717-19967259	0.742518	0.746258
203569_s_at	OFD1	chrX:13734743-13777955	0.587582	0.471664
203594_at	RTCA	chr1:100266216-100292769	-0.530609	-0.434296
203624_at	AKAP17A	chrX:1591604-1602520	0.311389	0.317561
203663_s_at	COX5A	chr15:74919791-74938083	-0.388252	-0.34465
203688_at	PKD2	chr4:88007635-88077777	0.635146	0.626066
203723_at	ITPKB	chr1:226631690-226739323	1.01871	1.10868
203767_s_at	STS	chrX:7147237-7804358	-0.664586	-0.857302
203794_at	CDC42BPA	chr1:226989865-227318492	0.31371	0.349407
203804_s_at	LUC7L3	chr17:50719565-50756219	0.714296	0.689996
203890_s_at	DAPK3	chr19:3958453-3971123	-0.608725	-0.625768
203895_at	PLCB4	chr20:9067825-9504593	-0.509661	-0.481679
203946_s_at	ARG2	chr14:67619920-67651708	-1.02574	-0.76184
203961_at	NEBL	chr10:20779973-21293011	0.481081	0.736472
203981_s_at	ABCD4	chr14:74285269-74303055	0.392343	0.309103
204041_at	MAOB	chrX:43766610-43882450	0.50155	0.515508
204185_x_at	PPID	chr4:158709127-158723396	-0.549044	-0.501422
204186_s_at	PPID	chr4:158709127-158723396	-0.991871	-0.659488
204187_at	GMPR	chr6:16238587-16295549	0.793728	0.790214
204247_s_at	CDK5	chr7:151053815-151057897	-0.429154	-0.301559
204338_s_at	RGS4	chr1:163068775-163076802	-1.71164	-2.5684
204339_s_at	RGS4	chr1:163068775-163076802	-0.87334	-1.6543
204417_at	GALC	chr14:87837820-87993665	0.371085	0.450355
204526_s_at	TBC1D8	chr2:101007228-101252866	0.330933	0.357935
204538_x_at	NPIPA1	chr16:15448713-15463457	0.664947	0.594767
204552_at	INPP4A	chr2:98444854-98594392	-0.541968	-0.933399
204560_at	FKBP5	chr6:35573585-35728583	0.909071	0.890048
204675_at	SRD5A1	chr5:6633427-6674386	-0.768116	-0.507037
204678_s_at	KCNK1	chr1:233614106-233672514	-0.909776	-1.24634
204716_at	CCDC6	chr10:59788747-59906556	-0.473723	-0.543746
204723_at	SCN3B	chr11:123629187-123655244	-0.693853	-0.604449
204990_s_at	ITGB4	chr17:75721328-75757818	0.612784	0.752939
204996_s_at	CDK5R1	chr17:32486993-32491253	-0.535606	-0.486462
205148_s_at	CLCN4	chrX:10156975-10237660	-0.55793	-0.575336
205202_at	PCMT1	chr6:149749444-149811420	-0.397156	-0.677575
205293_x_at	BAIAP2	chr17:81035122-81117434	-0.448956	-0.396367
205330_at	MN1	chr22:27748277-27801756	-0.617598	-0.494041
205462_s_at	HPCAL1	chr2:10302889-10427617	-0.696536	-0.651775
205518_s_at	CMAHP	chr6:25061626-25452263	0.721686	0.656841
205591_at	OLFM1	chr9:135075422-135121180	-0.537938	-0.545515
205625_s_at	CALB1	chr8:90058608-90095475	-1.93869	-1.44836
205626_s_at	CALB1	chr8:90058608-90095475	-2.20402	-1.51857
205630_at	CRH	chr8:66176376-66178464	-1.60238	-1.38543
205632_s_at	PIP5K1B	chr9:68705240-69009176	-0.643813	-0.536902
205827_at	CCK	chr3:42257825-42266185	-0.564059	-0.583711
205850_s_at	GABRB3	chr15:26543552-26939539	-1.01186	-1.21951
205874_at	ITPKA	chr15:41493393-41503551	-0.714041	-0.541149
205882_x_at	ADD3	chr10:109996368-110135565	0.672771	0.737345
205883_at	ZBTB16	chr11:114059041-114256765	0.530803	0.440251
205899_at	CCNA1	chr13:36431520-36442870	-0.416017	-0.51003
205952_at	KCNK3	chr2:26692722-26733420	-0.66112	-0.593931
206023_at	NMU	chr4:55595229-55636698	-0.642848	-0.569863
206045_s_at	NOL4	chr18:33851100-34224952	-0.554002	-0.612394
206075_s_at	CSNK2A1	chr20:472498-543835	-0.383714	-0.442698
206115_at	EGR3	chr8:22687659-22693480	-0.724117	-1.01941
206116_s_at	TPM1	chr15:63042632-63071915	-0.482786	-0.491005
206208_at	CA4	chr17:60149942-60170899	-0.697493	-0.75449
206209_s_at	CA4	chr17:60149942-60170899	-0.702431	-0.946021
206356_s_at	GNAL	chr18:11689264-11885685	-0.898743	-0.629359
206384_at	CACNG3	chr16:24256335-24362412	-0.481926	-0.347945
206474_at	CDK17	chr12:96278261-96400480	-0.650066	-0.830353
206577_at	VIP	chr6:152750797-152759765	-1.39078	-1.01184
206670_s_at	GAD1	chr2:170813213-170861151	-1.12149	-1.19149
206731_at	CNKSR2	chrX:21372801-21654695	-0.578624	-0.865828
206888_s_at	ARHGDIG	chr16:268727-282084	-0.513077	-0.455993
206973_at	PPFIA2	chr12:81257975-81759553	-0.372837	-0.384031
207058_s_at	PRKN	chr6:161769670-163148800	-0.442247	-0.472553
207081_s_at	PI4KA	chr22:21473000-21517533	-0.43251	-0.755555
207088_s_at	SLC25A11	chr17:4937130-4940053	-0.36035	-0.354602
207103_at	KCND2	chr7:120273175-120750337	-0.595115	-0.708499
207124_s_at	GNB5	chr15:52115100-52191392	-0.735845	-0.894056
207142_at	KCNJ3	chr2:154697855-154858354	-0.763908	-0.895736
207149_at	CDH12	chr5:21750673-22853344	-0.588564	-0.562356
207483_s_at	CAND1	chr12:67269358-67319953	-0.445484	-0.463967
207527_at	KCNJ9	chr1:160081538-160090563	-0.760688	-0.990642
207547_s_at	FAM107A	chr3:58564117-58627610	0.790236	1.14322
207627_s_at	TFCP2	chr12:51093656-51173135	-0.401901	-0.393833
207747_s_at	DOK4	chr16:57471922-57487327	-0.273061	-0.277424
207791_s_at	RAB1A	chr2:65070696-65130331	-0.535626	-0.818676
207996_s_at	LDLRAD4	chr18:13217498-13652755	-0.548563	-0.533991
208002_s_at	ACOT7	chr1:6264269-6393767	-0.699548	-0.566753
208092_s_at	CYRIA	chr2:16733900-16805288	-0.825603	-1.16872
208116_s_at	MAN1A1	chr6:119177205-119349761	-0.964684	-0.679064
208121_s_at	PTPRO	chr12:15322257-15602175	-0.750211	-0.71685
208124_s_at	SEMA4F	chr2:74654228-74683853	-0.355447	-0.432481
208243_s_at	CNR1	chr6:88139864-88166347	-0.45195	-0.469903
208290_s_at	EIF5	chr14:103333544-103345025	-0.790147	-0.747447
208351_s_at	MAPK1	chr22:21759657-21867680	-0.696467	-0.977644
208424_s_at	CIAPIN1	chr16:57428187-57447420	-0.619605	-0.410808
208447_s_at	PRPS1	chrX:107628428-107651993	-0.805917	-0.748559
208465_at	GRM2	chr3:51707068-51718613	-0.434645	-0.504062
208638_at	PDIA6	chr2:10783391-10837977	-0.416729	-0.33151
208675_s_at	DDOST	chr1:20651767-20661544	-0.294062	-0.325164
208687_x_at	HSPA8	chr11:123057489-123063230	-0.545776	-0.561846
208708_x_at	EIF5	chr14:103333544-103345025	-0.604516	-0.541015
208750_s_at	ARF1	chr1:228097263-228097341	-0.572727	-0.517656
208761_s_at	SUMO1	chr2:202206182-202238599	-0.321055	-0.600024
208781_x_at	SNX3	chr6:108533043-108582145	-0.475658	-0.333656
208833_s_at	ATXN10	chr22:45671798-45845307	-0.278225	-0.337015
208837_at	TMED3	chr15:79311112-79427432	-0.443927	-0.478665
208838_at	CAND1	chr12:67269358-67319953	-0.418301	-0.473261
208839_s_at	CAND1	chr12:67269358-67319953	-0.418472	-0.388449
208840_s_at	G3BP2	chr4:75641849-75724589	-0.946438	-1.32912
208850_s_at	THY1	chr11:119415476-119424985	-0.889109	-0.628016
208857_s_at	PCMT1	chr6:149749444-149811420	-0.50972	-0.904071
208872_s_at	REEP5	chr5:112876385-112922289	-0.609559	-0.919704
208877_at	PAK2	chr3:196739857-196832647	0.408225	0.564205
208890_s_at	PLXNB2	chr22:50274979-50307646	0.460642	0.524337
208909_at	UQCRFS1	chr19:29205320-29213151	-0.41154	-0.459808
209018_s_at	PINK1	chr1:20633458-20651511	-0.343887	-0.335329
209022_at	STAG2	chrX:123960212-124422664	0.484724	0.598339
209036_s_at	MDH2	chr7:76048051-76067508	-0.389001	-0.441108
209102_s_at	HBP1	chr7:107168961-107202522	0.481153	0.423271
209157_at	DNAJA2	chr16:46955362-46973674	-0.366067	-0.457305
209227_at	TUSC3	chr8:15417215-15766649	-0.792856	-0.623503
209228_x_at	TUSC3	chr8:15417215-15766649	-0.647953	-0.720511
209273_s_at	ISCA1	chr5:62776877-62777263	-0.565456	-0.707575
209393_s_at	EIF4E2	chr2:232550659-232583644	-0.408423	-0.50635
209541_at	IGF1	chr12:102395874-102481744	-0.824622	-0.706299
209558_s_at	HIP1R	chr12:122834453-122862961	0.567353	0.71018
209576_at	GNAI1	chr7:79768028-80226181	-0.697696	-0.639079
209582_s_at	CD200	chr3:112332347-112362812	-0.566105	-0.94846
209584_x_at	APOBEC3C	chr22:39014257-39020352	0.307716	0.282059
209615_s_at	PAK1	chr11:77322017-77474635	-1.13254	-1.28418
209683_at	CYRIA	chr2:16731119-16805288	-0.50342	-0.662044
209685_s_at	PRKCB	chr16:23835983-24220611	-0.353451	-0.458925
209822_s_at	VLDLR	chr9:2621182-2660056	-0.593801	-0.594009
209824_s_at	ARNTL	chr11:13276652-13387266	-0.308921	-0.402493
209825_s_at	UCK2	chr1:165827614-165911618	-0.323063	-0.319593
209869_at	ADRA2A	chr10:111077029-111080907	-0.683388	-0.667891
209907_s_at	ITSN2	chr2:24202864-24360536	0.40673	0.42071
209965_s_at	RAD51D	chr17:35092221-35121522	-0.299722	-0.263231
210104_at	MED6	chr14:70581257-70600690	-0.356429	-0.492366
210156_s_at	PCMT1	chr6:149749444-149811420	-0.617198	-1.1389
210182_at	CORT	chr1:10430102-10452153	-0.564457	-0.416098
210231_x_at	SET	chr3:155987304-155988176	0.490315	0.749627
210243_s_at	B4GALT3	chr1:161171310-161177968	-0.432797	-0.284879
210263_at	KCNF1	chr2:10911934-10914225	-0.532179	-0.440044
210277_at	AP4S1	chr14:31025106-31130996	-0.501231	-0.456094
210278_s_at	AP4S1	chr14:31025106-31130996	-0.863368	-0.765898
210285_x_at	WTAP	chr6:51410081-51410537	-0.522665	-0.550181
210315_at	SYN2	chr3:12004388-12192032	-1.03256	-1.5875
210338_s_at	HSPA8	chr11:123057489-123063230	-0.700545	-0.830264
210349_at	CAMK4	chr5:111223653-111494886	-0.383501	-0.465116
210355_at	PTHLH	chr12:27958084-27972733	-0.419603	-0.318268
210448_s_at	P2RX5	chr17:3672199-3696240	-0.457712	-0.390696
210465_s_at	SNAPC3	chr9:15422734-15465953	-0.675362	-0.520379
210639_s_at	ATG5	chr6:106045423-106325791	-0.507335	-0.851451
210675_s_at	PTPRR	chr12:70638073-70920738	-0.776006	-0.695558
210691_s_at	CACYBP	chr2:183607442-183608119	-0.557149	-0.702458
210721_s_at	PAK5	chr20:9518036-9819479	-0.606477	-0.700638
210740_s_at	ITPK1	chr14:92936914-93116320	0.33577	0.348418
210787_s_at	CAMKK2	chr12:121237675-121298308	-1.26075	-1.49374
210817_s_at	CALCOCO2	chr17:48831018-48866522	0.584255	0.441057
210829_s_at	SSBP2	chr5:81412804-81751797	-0.368566	-0.33059
210880_s_at	EFS	chr14:23356403-23365752	0.348636	0.340499
210968_s_at	RTN4	chr2:54972187-55112621	-0.369557	-0.609225
210971_s_at	ARNTL	chr11:13276652-13387266	-0.589301	-1.20492
211016_x_at	HSPA4	chr5:133052013-133106449	-0.566323	-0.508188
211150_s_at	DLAT	chr11:112025408-112064404	-0.527514	-0.688947
211159_s_at	PPP2R5D	chr6:42984553-43012342	-0.418008	-0.578126
211382_s_at	TACC2	chr10:121989163-122254545	-0.432071	-0.419181
211431_s_at	TYRO3	chr15:41557675-41583589	-0.614848	-0.496727
211520_s_at	GRIA1	chr5:153489615-153813869	-0.788665	-0.56916
211555_s_at	GUCY1B1	chr4:156680241-156727700	-0.647619	-0.9881
211558_s_at	DHPS	chr19:12668071-12681834	-0.307569	-0.355452
211586_s_at	ATP2B2	chr3:10324023-10708007	-0.80206	-1.12614
211595_s_at	MRPS11	chr15:88467453-88480776	-0.307504	-0.324201
211597_s_at	HOPX	chr4:56647988-56681899	-0.477383	-0.471603
211725_s_at	BID	chr22:17734138-17774770	-0.517768	-0.388957
211812_s_at	B3GALNT1	chr3:161083883-161105411	-0.769225	-0.957661
211855_s_at	SLC25A14	chrX:130339888-130373361	-0.50962	-0.409151
211925_s_at	PLCB1	chr20:8077251-8968360	-0.754963	-0.883507
211976_at	NUDT3	chr6:34279679-34392669	0.281051	0.297478
211986_at	AHNAK	chr11:62433542-62556235	0.618817	0.691913
212041_at	ATP6V0D1	chr16:67438014-67481181	-0.535111	-0.586369
212117_at	RHOQ	chr2:46541806-46584688	0.441742	0.578349
212119_at	RHOQ	chr2:46541806-46584688	0.469268	0.596887
212120_at	RHOQ	chr2:46541806-46584688	0.609166	0.592208
212125_at	RANGAP1	chr22:41244779-41286187	-0.594985	-0.640153
212134_at	PHLDB1	chr11:118606440-118658031	0.298611	0.441664
212144_at	SUN2	chr22:38733290-38794143	0.460477	0.520413
212254_s_at	DST	chr6:56457987-56954830	0.32604	0.548157
212271_at	MAPK1	chr22:21759657-21867680	-0.354544	-0.599599
212288_at	FNBP1	chr9:129887187-130043189	0.542252	0.674786
212299_at	NEK9	chr14:75079353-75127344	0.462247	0.424918
212306_at	CLASP2	chr3:33496245-33718356	-0.416086	-0.618726
212339_at	EPB41L1	chr20:36091504-36232799	0.46321	0.361969
212355_at	KHNYN	chr14:24429286-24441843	0.396479	0.371919
212364_at	MYO1B	chr2:191245185-191425389	-0.566477	-0.586025
212365_at	MYO1B	chr2:191245185-191425389	-0.474233	-0.564509
212445_s_at	NEDD4L	chr18:58044226-58401540	-0.600904	-0.766755
212461_at	AZIN1	chr8:102826111-102893864	-0.44401	-0.396372
212487_at	GPATCH8	chr17:44395281-44503430	0.474409	0.496115
212494_at	TNS2	chr12:53046969-53064379	0.430797	0.531625
212500_at	ADO	chr10:62804720-62808479	-0.398916	-0.447766
212502_at	ADO	chr10:62804720-62808479	-0.286198	-0.381137
212548_s_at	FRYL	chr4:48497357-48780322	0.432934	0.639251
212551_at	CAP2	chr6:17393595-17557780	-0.571606	-0.498161
212553_at	RPRD2	chr1:150363091-150476566	0.409199	0.366013
212586_at	CAST	chr5:96525267-96779595	0.435803	0.446624
212711_at	CAMSAP1	chr9:135808487-135907546	-0.354184	-0.309688
212712_at	CAMSAP1	chr9:135808487-135907546	-0.472126	-0.554229
212726_at	PHF2	chr9:93576584-93679587	0.320639	0.283544
212729_at	DLG3	chrX:70444835-70505490	-0.493095	-0.669331
212772_s_at	ABCA2	chr9:137007234-137028915	0.552869	0.526859
212829_at	PIP4K2A	chr10:22534854-22714578	0.657352	1.17402
212852_s_at	RO60	chr1:193028763-193055329	0.58303	0.660013
212854_x_at	NBPF1	chr1:144146970-144830409	0.579531	0.442671
212857_x_at	SUB1	chr5:32531633-32604079	-0.334666	-0.298353
212976_at	LRRC8B	chr1:89524829-89597861	-0.669899	-0.909323
212994_at	THOC2	chrX:123600561-123733056	0.336392	0.32304
213074_at	PHIP	chr6:78934419-79078287	0.558885	0.53517
213096_at	TMCC2	chr1:205227946-205285632	0.395945	0.377951
213131_at	OLFM1	chr9:135075422-135121180	-0.591949	-0.623803
213132_s_at	MCAT	chr22:43132209-43143398	-0.35308	-0.345897
213144_at	GOSR2	chr17:46923075-46975524	-0.392056	-0.343773
213219_at	ADCY2	chr5:7396138-7830081	-0.959903	-0.799323
213305_s_at	PPP2R5C	chr14:101761709-101927989	-0.471668	-0.44763
213309_at	PLCL2	chr3:16802651-17090582	-0.516213	-0.580235
213325_at	NECTIN3	chr3:110790512-110854797	-1.25004	-1.03791
213327_s_at	USP12	chr13:27066156-27171811	-0.348303	-0.455536
213333_at	MDH2	chr7:76048051-76067508	-0.324724	-0.373588
213423_x_at	TUSC3	chr8:15417215-15766649	-0.520332	-0.71232
213428_s_at	COL6A1	chr21:45981770-46005050	0.489119	0.376308
213438_at	NFASC	chr1:204828651-205022822	0.463712	0.42732
213447_at	IPW	chr15:24978583-25420336	0.336951	0.309873
213465_s_at	PPP1R7	chr2:241149576-241183652	-0.461564	-0.342301
213489_at	MAPRE2	chr18:34976928-35143470	-0.48018	-0.319437
213496_at	PLPPR4	chr1:99264292-99309590	-0.724451	-0.673844
213532_at	ADAM17	chr2:9488486-9556732	0.486494	0.39304
213552_at	GLCE	chr15:69160584-69272217	-0.536026	-0.54397
213617_s_at	TPGS2	chr18:36777647-36829216	-0.502208	-0.433251
213737_x_at	GOLGA8N	chr15:30233872-30247618	0.777163	0.488761
213791_at	PENK	chr8:56436674-56446671	-0.935778	-0.859209
213793_s_at	HOMER1	chr5:79372636-79514134	-0.624883	-0.614881
213924_at	GNAL	chr18:11689264-11885685	-0.563147	-0.54949
214016_s_at	SFPQ	chr1:35176378-35193446	0.923809	0.864413
214293_at	SEPTIN11	chr4:77960893-77961305	-0.394092	-0.669047
214318_s_at	FRY	chr13:31846713-32299125	-0.637358	-0.618915
214359_s_at	HSP90AB1	chr6:44246166-44253888	-0.422118	-0.489269
214365_at	TPM3	chr1:154155308-154194648	-0.35126	-0.438565
214512_s_at	SUB1	chr5:32531633-32604079	-0.44007	-0.54626
214553_s_at	ARPP19	chr15:52547045-52569883	-0.981727	-1.20684
214611_at	GRIK1	chr21:29536933-29940033	-0.475781	-0.510106
214649_s_at	MTMR2	chr11:95821766-95925315	-0.425637	-0.431026
214652_at	DRD1	chr5:175440036-175444182	-0.573816	-0.73803
214671_s_at	ABR	chr17:1003519-1116206	-0.562279	-0.481462
214683_s_at	CLK1	chr2:200853009-200864691	0.996053	0.933674
214772_at	KIAA1549L	chr11:33376108-33674102	-0.785176	-0.823262
214811_at	RIMBP2	chr12:130396133-130768228	-0.612659	-0.426882
214844_s_at	DOK5	chr20:54475593-54651169	-0.568905	-0.37249
214930_at	SLITRK5	chr13:87671371-87696272	-0.420617	-0.695743
214931_s_at	SRPK2	chr7:105110704-105399308	-0.438144	-0.539663
214959_s_at	API5	chrX:116106921-116108430	-0.585114	-0.714004
215016_x_at	DST	chr6:56457987-56954830	0.306003	0.438789
215227_x_at	ACP1	chr2:264140-278283	-0.437805	-0.558129
215241_at	ANO3	chr11:26188842-26663289	-0.620003	-0.542174
215380_s_at	GGCT	chr7:30496621-30504841	-0.490779	-0.519165
215531_s_at	GABRA5	chr15:26866911-26949208	-1.24674	-1.12945
215543_s_at	LARGE1	chr22:33669070-34316410	-0.324917	-0.581373
215645_at	FLCN	chr17:17212212-17237188	0.423606	0.461917
215728_s_at	ACOT7	chr1:6264269-6393767	-0.728694	-0.724562
215767_at	ZNF804A	chr2:184598529-184939492	-0.646582	-0.615064
215913_s_at	GULP1	chr2:188291669-188595931	-0.502494	-0.565339
215952_s_at	OAZ1	chr19:2269509-2273490	-0.446754	-0.448218
215984_s_at	ARFRP1	chr20:63698642-63708025	-0.408907	-0.34941
216048_s_at	RHOBTB3	chr5:95713522-95824383	0.984393	0.863595
216120_s_at	ATP2B2	chr3:10324023-10708007	-0.764015	-1.40165
216218_s_at	PLCL2	chr3:16802651-17090582	-1.08373	-1.23473
216266_s_at	ARFGEF1	chr8:67173511-67343781	-0.439936	-0.690998
216307_at	DGKB	chr7:14145049-14974777	-1.22608	-0.836896
216602_s_at	FARSA	chr19:12922479-12934037	-0.514527	-0.546077
216985_s_at	STX3	chr11:59713456-59805882	-0.351419	-0.422097
217118_s_at	KIAA0930	chr22:45192244-45240894	0.565671	0.548449
217140_s_at	VDAC1	chrY:5207215-5208069	-0.638941	-0.565619
217188_s_at	ERG28	chr14:76117897-76127214	-0.485549	-0.463913
217457_s_at	RAP1GDS1	chr4:98261384-98443858	-0.560469	-0.683736
217556_at	CLCN4	chrX:10156975-10237660	-0.716805	-0.943412
217562_at	BRINP3	chr1:190097658-190478404	-0.551821	-0.447349
217755_at	JPT1	chr17:73132079-73150595	-0.692	-0.519038
217781_s_at	ZNF106	chr15:42412823-42491141	0.372078	0.348348
217786_at	PRMT5	chr14:22920525-22929408	-0.386988	-0.377683
217802_s_at	NUCKS1	chr1:205712822-205750182	0.443939	0.410964
217807_s_at	NOP53	chr19:48248809-48260314	0.493705	0.592056
217860_at	NDUFA10	chr2:239892450-240025743	-0.337215	-0.266136
217883_at	MMADHC	chr2:149569637-149587778	-0.34568	-0.397548
217908_s_at	DCAF6	chr1:167935783-168075843	-0.519745	-0.786769
217909_s_at	MLX	chr17:42567072-42573239	-0.331785	-0.307468
217915_s_at	RSL24D1	chr15:55180806-55197049	-0.411028	-0.562077
217930_s_at	TOLLIP	chr11:1274371-1309654	-0.769095	-0.719721
217941_s_at	ERBIN	chr5:65222383-65376342	0.792726	1.07947
217971_at	LAMTOR3	chr4:99878336-99894428	-0.291077	-0.321422
217976_s_at	DYNC1LI1	chr3:32525974-32570858	-0.49423	-0.565348
218047_at	OSBPL9	chr1:51577179-51798427	0.340573	0.413786
218120_s_at	HMOX2	chr16:4476649-4512306	-0.576323	-0.578792
218159_at	DDRGK1	chr20:3190350-3204685	-0.419631	-0.373883
218163_at	MCTS1	chrX:120594010-120621159	-0.584779	-0.553663
218209_s_at	RPRD1A	chr18:35984387-36067576	-0.560078	-0.775838
218214_at	ATG101	chr12:52069246-52077495	-0.531115	-0.46372
218217_at	SCPEP1	chr17:56978129-57006768	0.386848	0.369178
218219_s_at	LANCL2	chr7:55365337-55433737	-0.570267	-0.563153
218224_at	PNMA1	chr14:73711783-73714384	-0.30649	-0.486798
218309_at	CAMK2N1	chr1:20482391-20486210	-0.313201	-0.525896
218318_s_at	NLK	chr17:28041737-28196381	-0.511388	-0.518449
218364_at	LRRFIP2	chr3:37052626-37183689	0.391674	0.31416
218396_at	VPS13C	chr15:61852389-62060473	1.16358	0.809769
218552_at	ECHDC2	chr1:52895910-52927212	0.49638	0.390472
218611_at	IER5	chr1:181088700-181092900	-0.572758	-0.589216
218623_at	NSG2	chr5:173472761-173536181	-0.457327	-0.65305
218648_at	CRTC3	chr15:90529923-90645345	0.384394	0.336604
218667_at	PJA1	chrX:69160851-69165521	-0.397704	-0.356688
218788_s_at	SMYD3	chr1:245749342-246507312	-0.504447	-0.540672
218813_s_at	SH3GLB2	chr9:129007036-129028331	-0.592761	-0.643161
218866_s_at	POLR3K	chr16:46407-53608	-0.508937	-0.584638
218868_at	ACTR3B	chr7:152759749-152855378	-0.982436	-0.756735
218888_s_at	NETO2	chr16:47077703-47143945	-0.969137	-0.944521
218890_x_at	MRPL35	chr2:86199355-86213790	-0.393574	-0.433298
218942_at	PIP4K2C	chr12:57591174-57603418	-0.448366	-0.465685
219093_at	PID1	chr2:228850526-229271287	-0.481581	-0.394614
219176_at	MAIP1	chr2:200820039-200828839	-0.416054	-0.311051
219260_s_at	ELP5	chr17:7251416-7259940	-0.440996	-0.317072
219326_s_at	B3GNT2	chr2:62196115-62224731	-0.55513	-0.790964
219378_at	NAA16	chr13:41311267-41377030	0.595824	0.775849
219402_s_at	DERL1	chr8:123013170-123042302	-0.527871	-0.389253
219532_at	ELOVL4	chr6:79914814-79947553	-0.44208	-0.471339
219553_at	NME7	chr1:169132531-169367948	-0.508118	-0.566614
219671_at	HPCAL4	chr1:39678648-39691485	-0.461496	-0.36879
219931_s_at	KLHL12	chr22:20450122-20451824	-0.406541	-0.566626
219939_s_at	CSDE1	chr1:114716913-114758676	0.350963	0.498757
219979_s_at	HIKESHI	chr11:86013268-86056704	-0.45391	-0.522733
220030_at	STYK1	chr12:10618923-10674318	-1.19187	-0.906444
220097_s_at	TMEM104	chr17:74776499-74839753	0.270585	0.385669
220189_s_at	MGAT4B	chr5:179798463-179807814	-0.326356	-0.324893
220294_at	KCNV1	chr8:109963636-109975771	-0.902089	-1.17522
220331_at	CYP46A1	chr14:99684298-99727301	-0.742031	-0.372943
220345_at	LRRTM4	chr2:76747685-77593319	-0.742565	-0.703786
220359_s_at	ARPP21	chr3:35638945-35794496	-0.627093	-0.734245
220553_s_at	PRPF39	chr14:45084107-45116282	0.582865	0.469927
220753_s_at	CRYL1	chr13:20403666-20525873	0.493539	0.458032
220773_s_at	GPHN	chr14:66507407-67181803	-0.618099	-0.546519
220889_s_at	CA10	chr17:51630313-52160017	-1.02617	-1.08867
220917_s_at	WDR19	chr4:39182504-39285810	0.510003	0.362274
221082_s_at	NDRG3	chr20:36651766-36746090	-0.843012	-1.15161
221094_s_at	ELP3	chr8:28089673-28191156	-0.348347	-0.397045
221246_x_at	TNS1	chr2:217799588-218033982	0.390059	0.591248
221423_s_at	YIPF5	chr5:144158162-144170714	-0.524595	-0.688399
221425_s_at	ISCA1	chr5:62776877-62777263	-0.615064	-0.8269
221449_s_at	ITFG1	chr16:47154387-47464149	-0.637418	-0.969636
221471_at	SERINC3	chr20:44496221-44522085	-0.530274	-0.494992
221482_s_at	ARPP19	chr15:52547045-52569883	-0.530948	-0.647632
221696_s_at	STYK1	chr12:10618923-10674318	-0.551279	-0.657106
221725_at	WASF2	chr1:27404230-27490167	0.444652	0.390094
221748_s_at	TNS1	chr2:217799588-218033982	0.754623	0.952381
221760_at	MAN1A1	chr6:119177205-119349761	-0.847454	-0.622081
221803_s_at	NRBF2	chr10:63133247-63155031	-0.626654	-0.515934
221816_s_at	PHF11	chr13:49495610-49528981	0.481099	0.456944
221837_at	KLHL22	chr22:20441519-20495844	-0.612505	-0.428162
221891_x_at	HSPA8	chr11:123057489-123063230	-0.440865	-0.571405
221904_at	FAM131A	chr3:184335926-184348421	-0.431671	-0.50268
222005_s_at	GNG3	chr11:62707676-62709201	-0.613021	-0.896568
222154_s_at	SPATS2L	chr2:200305881-200482264	-0.315155	-0.264305
222231_s_at	LRRC59	chr17:50375059-50397523	-0.475464	-0.319645
222387_s_at	VPS35	chr16:46656132-46689518	-0.701355	-0.945659
222396_at	JPT1	chr17:73131345-73132211	-0.437605	-0.481698
222442_s_at	ARL8B	chr3:5122249-5180911	-0.573829	-0.866642
222473_s_at	ERBIN	chr5:65222383-65376723	0.922565	0.999255
222478_at	VPS36	chr13:52412602-52450634	-0.332582	-0.444655
222500_at	PPIL1	chr6:36854827-36874803	-0.523359	-0.377281
222502_s_at	UFM1	chr13:38349849-38363619	-0.484262	-0.49896
222505_at	LMBR1	chr7:156668946-156893216	-0.435125	-0.440497
222555_s_at	MRPL44	chr2:223957463-223967714	-0.753344	-0.600311
222558_at	RPRD1A	chr18:35984387-36067576	-0.616192	-0.688833
222589_at	NLK	chr17:28041737-28196381	-0.509566	-0.79644
222590_s_at	NLK	chr17:28041737-28196381	-0.69587	-0.61077
222594_s_at	SPATS2	chr12:49366584-49527425	-0.319013	-0.3709
222613_at	C12orf4	chr12:4487735-4538508	-0.471099	-0.566819
222632_s_at	LZTFL1	chr3:45823316-45916042	-0.687168	-0.71266
222656_at	UBE2W	chr8:73780097-73878910	-0.464733	-0.379792
222658_s_at	APTX	chr9:32886601-33025130	-0.452605	-0.451139
222703_s_at	YRDC	chr1:37802945-37808208	-0.359349	-0.35611
222728_s_at	TAF1D	chr11:93729948-93784391	0.527328	0.780853
222774_s_at	NETO2	chr16:47077703-47143945	-1.30319	-1.09308
222826_at	BLOC1S6	chr15:45587214-45615945	-0.770872	-0.909001
222870_s_at	B3GNT2	chr2:62196115-62224731	-0.466779	-0.724404
222979_s_at	SURF4	chr9:133361598-133376314	-0.352098	-0.292525
222990_at	UBQLN1	chr9:83659968-83707958	-0.388422	-0.662376
223021_x_at	VTA1	chr6:142147162-142224685	-0.828611	-0.628171
223022_s_at	VTA1	chr6:142147162-142224685	-0.297669	-0.412648
223094_s_at	ANKH	chr5:14704800-14871778	-0.355262	-0.438206
223135_s_at	BBX	chr3:107522936-107811339	0.377445	0.458946
223145_s_at	AKIRIN2	chr6:87674860-87702233	-0.402948	-0.391151
223151_at	DCUN1D5	chr11:103050686-103092194	-0.43994	-0.279787
223156_at	MRPS23	chr17:57834781-57850056	-0.523423	-0.407081
223168_at	RHOU	chr1:228721284-228732469	0.89113	1.26214
223192_at	SLC25A28	chr10:99610519-99622793	0.312122	0.458763
223334_at	TMEM126A	chr11:85647967-85656547	-0.337324	-0.288934
223374_s_at	B3GALNT1	chr3:161083883-161105411	-0.421079	-0.655379
223383_at	ZNRF1	chr16:74999024-75110994	-0.408583	-0.633047
223550_s_at	CA10	chr17:51630313-52160017	-0.712429	-0.903559
223573_s_at	PPP2R2C	chr4:6320578-6563600	-0.86792	-0.774761
223611_s_at	LNX1	chr4:53459301-53701405	-0.481424	-0.613158
223650_s_at	NRBF2	chr10:63133247-63155031	-0.635207	-0.600002
223653_x_at	CELF4	chr18:37243040-37565827	-0.644599	-0.676442
223708_at	C1QTNF4	chr11:47589667-47594411	-0.862028	-0.64526
223721_s_at	DNAJC12	chr10:67796669-67838188	-0.445158	-0.403245
223735_at	ARL6	chr3:97764521-97801229	-0.764974	-0.90571
223821_s_at	SUSD4	chr1:223220819-223364233	-0.708757	-0.706865
223960_s_at	CDIP1	chr16:4512634-4526261	0.341278	0.282861
224187_x_at	HSPA8	chr11:123057489-123063230	-0.504671	-0.527269
224368_s_at	NDRG3	chr20:36651766-36746090	-0.763413	-1.05233
224393_s_at	TMEM121B	chr22:17597189-17602143	-0.375042	-0.362384
224410_s_at	LMBR1	chr7:156668946-156893216	-0.604852	-0.944258
224413_s_at	TM2D2	chr8:38988808-38996824	-0.425159	-0.45669
224437_s_at	VTA1	chr6:142147162-142224685	-0.451601	-0.442923
224484_s_at	BRMS1L	chr14:35826338-35932325	-0.57607	-0.649302
224562_at	WASF2	chr1:27404230-27490167	0.636075	0.872828
224583_at	COTL1	chr16:84565596-84618078	0.644534	0.905396
224586_x_at	SUB1	chr5:32531633-32604079	-0.394784	-0.312345
224587_at	SUB1	chr5:32531633-32604079	-0.718821	-0.746425
224613_s_at	DNAJC5	chr20:63895126-63936031	-0.350918	-0.331581
224641_at	FYTTD1	chr3:197737179-197787596	-0.33779	-0.318862
224647_at	CCNY	chr10:35247025-35572669	-0.338804	-0.458643
224649_x_at	CCNY	chr10:35247025-35572669	-0.646576	-0.725645
224650_at	MAL2	chr8:119165034-119245673	-0.904021	-1.42516
224673_at	LENG8	chr19:54380864-54394163	0.629446	0.621991
224704_at	TNRC6A	chr16:24610209-24827632	0.609465	0.376284
224759_s_at	TMEM263	chr12:106955719-106978778	-0.280995	-0.297634
224782_at	ZMAT2	chr5:140698680-140706686	-0.428583	-0.521747
224784_at	MLLT6	chr17:38506329-38530590	0.463689	0.53557
224794_s_at	CERCAM	chr9:128411751-128437351	0.692413	0.870638
224799_at	NDFIP2	chr13:79481155-79556077	-0.708069	-1.13703
224802_at	NDFIP2	chr13:79481155-79556077	-0.489528	-0.815523
224840_at	FKBP5	chr6:35573585-35728583	2.09888	1.78377
224856_at	FKBP5	chr6:35573585-35728583	1.70736	1.2636
224881_at	VKORC1L1	chr7:65873074-65959563	-0.283867	-0.329863
224896_s_at	TTL	chr2:112482156-112541739	-0.666975	-0.457375
224908_s_at	TTL	chr2:112482156-112541739	-0.749724	-0.514491
224953_at	YIPF5	chr5:144158162-144170714	-0.567701	-1.04884
225019_at	CAMK2D	chr4:113418054-113761927	0.32063	0.328681
225048_at	PHF10	chr6:169703902-169725566	0.335775	0.433416
225052_at	TMEM203	chr9:137204082-137205648	-0.402494	-0.438488
225064_at	RABEP1	chr17:5282265-5386340	-0.510926	-0.420992
225071_at	NUS1	chrX:47512602-47513483	-0.366976	-0.352802
225186_at	RAPH1	chr2:203394345-203535335	-0.583275	-0.723553
225202_at	RHOBTB3	chr5:95713522-95824383	1.10756	1.0567
225222_at	MFSD14A	chr1:99970011-100083321	-0.365053	-0.31675
225235_at	TSPAN17	chr5:176647387-176659054	-0.300507	-0.294749
225259_at	RAB6B	chr3:133824235-133895882	-0.530945	-0.685499
225270_at	NEO1	chr15:73051710-73305205	0.467302	0.485398
225338_at	ZYG11B	chr1:52726453-52827336	-0.380052	-0.465832
225391_at	LOC93622	chr4:6663396-6676755	-0.362596	-0.320503
225455_at	TADA1	chr1:166856510-166876264	-0.475906	-0.427923
225522_at	AAK1	chr2:69457997-69674349	0.505604	0.484363
225545_at	EEF2K	chr16:22236992-22300052	0.423288	0.362595
225546_at	EEF2K	chr16:22236992-22300052	0.537741	0.442191
225561_at	SELENOT	chr3:150346200-150348323	-0.316961	-0.32229
225657_at	NCBP2AS2	chr3:196669529-196670694	-0.383674	-0.538849
225726_s_at	PLEKHH1	chr14:67533290-67589612	1.07812	1.34228
225739_at	RAB11FIP4	chr17:31391675-31538211	-0.550322	-0.412874
225798_at	JAZF1	chr7:27830573-28180795	-0.505893	-0.629638
225800_at	JAZF1	chr7:27830573-28180795	-0.686538	-0.829187
225921_at	NIN	chr14:50719763-50831162	0.458717	0.43409
225959_s_at	ZNRF1	chr16:74999024-75110994	-0.484769	-0.410742
226114_at	ZNF436	chr1:23366912-23377300	-0.392905	-0.476845
226250_at	ZBTB20	chr3:114314500-115147292	0.545124	0.642031
226287_at	CCDC34	chr11:27330827-27363234	-0.518025	-0.422927
226289_at	CAPRIN1	chr11:34051731-34102610	-0.548179	-0.593003
226315_at	ZNF830	chr17:34961540-34963777	-0.295414	-0.356063
226374_at	CXADR	chr21:17513043-17593579	-0.501036	-0.475886
226436_at	RASSF4	chr10:44959407-44995891	0.788726	0.568391
226580_at	BRMS1L	chr14:35826338-35932325	-0.423309	-0.506334
226638_at	ARHGAP23	chr17:38229196-38313162	0.358557	0.396675
226651_at	HOMER1	chr5:79372636-79514134	-0.710399	-0.630731
226686_at	CISD2	chr22:16405330-16405417	-0.489357	-0.510707
226823_at	PHACTR4	chr1:28369582-28500364	0.406342	0.351868
226867_at	DENND4C	chr9:19230435-19374281	0.680115	0.502122
226907_at	PPP1R14C	chr6:150143044-150250392	-0.510853	-0.8137
226963_at	BTF3L4	chr2:159003975-159004320	-0.437277	-0.765098
226964_at	TTBK2	chr15:42738730-42920809	0.500339	0.390875
226981_at	KMT2A	chr11:118436456-118526832	0.651001	0.465148
227014_at	ASPHD2	chr22:26429260-26445015	-0.59832	-0.45271
227015_at	ASPHD2	chr22:26429260-26445015	-0.720547	-0.652135
227156_at	CASK	chrX:41514934-41923554	-0.403728	-0.398408
227176_at	SLC2A13	chr12:39755025-40106089	-0.446728	-0.296392
227208_at	CENATAC	chr11:118883892-118889035	0.864635	0.738942
227334_at	USP54	chr10:73497538-73626117	0.483258	0.791106
227408_s_at	SNX25	chr4:185204237-185370185	-0.494696	-0.358254
227420_at	TNFAIP8L1	chr19:4639516-4655568	-0.374362	-0.289333
227528_s_at	KMT2D	chr12:49018975-49060794	0.498426	0.489229
227630_at	PPP2R5E	chr14:63371364-63543377	-0.513683	-0.810051
227658_s_at	PLEKHA3	chr19:41521043-41521989	-0.533664	-0.526577
227669_at	MPC2	chr1:167916675-167937072	-0.376106	-0.50045
227690_at	GABRB3	chr15:26543552-26939539	-0.344559	-0.423503
227698_s_at	RAB40C	chr16:589357-629272	-0.397095	-0.40402
227775_at	CELF6	chr15:72284727-72320157	-0.535932	-0.356111
227821_at	LGI4	chr19:35124513-35142451	0.410231	0.392282
227824_at	PRKCB	chr16:23835983-24220611	-1.16076	-1.8063
227830_at	GABRB3	chr15:26543552-26939539	-0.701167	-0.820235
227880_s_at	TMEM185A	chrX:149768897-149771368	-0.468643	-0.410506
227960_s_at	FAHD1	chr16:1826967-1840207	-0.557012	-0.475388
228109_at	RASGRF2	chr5:80960363-81230162	-0.797842	-1.38187
228123_s_at	ABHD12	chr20:25294742-25390835	-0.34884	-0.321318
228135_at	C1orf52	chr1:85249953-85259672	-0.391452	-0.312755
228238_at	GAS5	chr1:173858559-173868882	0.677111	0.439736
228368_at	ARHGAP20	chr11:110577042-110713189	-0.718944	-1.00066
228501_at	GALNT15	chr3:16174680-16231992	0.799085	0.915436
228561_at	CDC37L1	chr9:4679559-4708399	-0.463478	-0.401301
228567_at	GAN	chr16:81314944-81390809	0.398815	0.438994
228598_at	DPP10	chr2:114442299-115845780	-0.469508	-0.515259
228640_at	PCDH7	chr4:30720369-31146805	-0.347919	-0.352084
228695_at	VXN	chr8:67405644-67429216	-1.30286	-1.05179
228701_at	VXN	chr8:67405644-67429216	-1.02418	-0.863055
228795_at	PRKCB	chr16:23835983-24220611	-0.813827	-1.42777
228851_s_at	ENSA	chr14:82692704-82693055	-1.07024	-0.973352
228987_at	CYRIB	chr8:130851838-130852614	-0.644927	-0.97678
229029_at	CAMK4	chr5:111223653-111494886	-0.739075	-0.934365
229080_at	COL26A1	chr7:101362875-101559024	-0.503311	-0.422531
229159_at	THSD7A	chr7:11370365-11832198	-0.774934	-0.675316
229192_s_at	TBCD	chr17:82923652-82946138	-0.379369	-0.418898
229254_at	MFSD4A	chr1:205570825-205572046	-0.780202	-0.606464
229256_at	PGM2L1	chr11:74330316-74398433	-0.362713	-0.409807
229300_at	RAB3C	chr5:58582221-58859394	-0.481303	-0.533726
229430_at	VXN	chr8:67430042-67430757	-0.453365	-0.263303
229461_x_at	NEGR1	chr1:71395943-72282539	-0.617355	-0.784352
229497_at	ANKDD1A	chr15:64911902-64958691	0.469083	0.685145
229799_s_at	NCAM1	chr11:112961247-113278436	0.597814	0.948543
229818_at	SVOP	chr12:108907741-109021068	-0.588391	-0.814147
229849_at	WIPF3	chr7:29806486-29917061	0.535426	0.590952
230117_at	VSTM2A	chr7:54542325-54571080	-0.747969	-0.851183
230158_at	DPY19L2	chr7:90119539-90124163	0.740994	0.59886
230217_at	CLVS1	chr8:61057158-61501645	-0.524977	-0.48553
230230_at	PTPN4	chr2:119759922-119984899	-0.563088	-0.594923
230263_s_at	DOCK5	chr8:25184689-25418082	1.10347	1.18403
230306_at	VPS26B	chr11:134224671-134247788	-0.47254	-0.329282
230418_s_at	GALNT16	chr14:69259277-69357033	0.51948	0.694356
230577_at	LINC00844	chr10:58999482-59066396	1.34004	1.72934
230695_s_at	RSPH9	chr6:43645036-43672600	-0.334655	-0.32782
230765_at	NWD2	chr4:37244743-37449463	-1.08987	-0.766896
230773_at	ZNF385D	chr3:21412218-22373321	-0.452718	-0.452796
230846_at	AKAP5	chr14:64465499-64474503	-0.561635	-0.433754
230883_at	NXPH2	chr2:138669157-138780390	-0.680832	-0.673179
230923_at	TAFA1	chr3:68593966-68594769	-0.842116	-1.00151
231186_at	LINC00643	chr14:62075340-62128421	-0.559411	-0.43456
231918_s_at	GFM2	chr5:74721206-74767147	-0.768172	-0.657432
231935_at	ARPP21	chr3:35638945-35794496	-0.693988	-0.837301
231980_at	DOK6	chr18:69400888-69849087	-0.697543	-0.663979
232010_at	FSTL5	chr4:161383897-162164004	-0.496121	-0.513998
232027_at	SYNE1	chr6:152121687-152637801	-0.73777	-0.558704
232053_x_at	RHBDD2	chr7:75842602-75888926	-0.647877	-0.626066
232275_s_at	HS6ST3	chr13:96090107-96839562	-1.26323	-1.29366
232390_at	NCAM2	chr21:20998409-21543329	-0.506385	-0.386746
232806_s_at	FAM131A	chr3:184335926-184348421	-0.788868	-0.919699
232859_s_at	MAGI1	chr3:65353525-66038834	-0.427105	-0.349662
233002_at	PPP4R4	chr14:94146128-94279735	-0.837563	-0.946266
233135_at	LINC01007	chr7:101562779-101569006	-0.670466	-0.940188
233234_at	KCTD16	chr5:144170873-144485686	-0.644089	-0.99937
233881_s_at	TOLLIP	chr11:1274371-1309654	-0.549312	-0.631784
233912_x_at	ELMOD2	chr4:141466189-141467758	0.405939	0.36671
233924_s_at	EXOC6	chr10:92826831-93059493	-0.554689	-0.873311
234024_at	CBLN4	chr20:55997357-56005519	-1.14133	-1.48167
234915_s_at	DENR	chr12:122752824-122771064	-0.543843	-0.542613
235006_at	CDKN2AIPNL	chr5:134402065-134411881	-0.824482	-0.634904
235295_at	PANX1	chr11:93917023-93917992	-0.649835	-0.925774
235320_at	ARL6	chr3:97764521-97801229	-0.448797	-0.664104
235502_at	PPP2CA	chr5:134194035-134226073	-0.622127	-0.912357
235591_at	SSTR1	chr14:38207904-38213067	-1.07643	-0.816167
235935_at	LRRC73	chr6:43506968-43510346	-0.627633	-0.688551
236290_at	DOK6	chr18:69400888-69849087	-0.727821	-0.449401
236308_at	VSTM2A	chr7:54542325-54571080	-0.799811	-1.1867
236361_at	GALNT15	chr3:16174680-16231992	0.721789	0.644229
236377_at	TMEM132D	chr12:129071725-129904025	-0.605805	-0.754524
236705_at	TMEM196	chr7:19719315-19773617	-0.76574	-1.01718
236734_at	SLITRK1	chr13:83877205-83882474	-0.436146	-0.303716
236902_at	LINC00643	chr14:62131154-62134188	-0.708867	-0.391166
236935_at	PTPN4	chr2:119759922-119984899	-0.445497	-0.451661
238029_s_at	SLC16A14	chr2:230034982-230068993	-0.52559	-0.518408
238360_s_at	LINC00672	chr17:38925168-38929384	-0.419428	-0.402239
238417_at	PGM2L1	chr11:74330316-74398433	-0.715679	-0.743193
238461_at	EIF4E3	chr3:71675414-71754773	-0.57043	-0.872031
238862_at	MFSD4A	chr1:205569789-205570486	-1.18394	-1.40312
238885_at	KIAA1549	chr7:138831381-138981389	-0.381058	-0.353515
239038_at	C1orf52	chr1:85249953-85259672	-0.667445	-0.459358
240532_at	SLC32A1	chr20:38724486-38729372	-0.807388	-0.835985
241382_at	PCP4L1	chr1:161258745-161285450	-0.925054	-0.80682
241672_at	SERTM1	chr13:36674020-36697839	-1.32339	-1.33614
241729_at	DOK6	chr18:69400888-69849087	-1.01021	-0.575602
242098_at	ARFGEF3	chr6:138161939-138344663	-0.671699	-0.672003
242286_at	GRIN2A	chr16:9753404-10182928	-0.806785	-1.00632
242372_s_at	MFSD4A	chr1:205566905-205570100	-1.02051	-1.03826
242825_at	PLPPR5	chr1:98890245-99227929	-0.440534	-0.552592
242999_at	ARHGEF7	chr13:111114559-111305737	-0.512642	-0.866274
243337_at	FREM3	chr4:143577302-143700675	-1.20151	-1.07368
243556_at	NGEF	chr2:232878701-233013256	-1.23621	-1.48158
243753_at	ERICH3	chr1:74568117-74673792	-0.734202	-0.790111
244170_at	RAB3C	chr5:58582221-58859394	-1.50072	-2.22097
244584_at	KIAA1549L	chr11:33376108-33674102	-0.693762	-1.0671
244675_at	RGS8	chr1:182641816-182684587	-0.645841	-0.518428
34726_at	CACNB3	chr12:48813794-48828941	-0.541647	-0.419049
38340_at	HIP1R	chr12:122834453-122862961	0.524042	0.527979
47608_at	TJAP1	chr6:43477523-43506556	0.328563	0.389105
823_at	CX3CL1	chr16:57372477-57385044	-0.633198	-0.461364
