# Supplementary material for: Genome-wide transcriptome profiling and development of age prediction models in the human brain
Source: Aging (Albany NY). 2024 Feb 28;16(5):4075–94. doi: 10.18632/aging.205609 (PMC10968712; doi:10.18632/aging.205609)
Supplement: Supplementary Table 5 [file aging-16-205609-s006.xlsx]

## Sheet: Sheet1
Supplementary Table 5. The 69 probe sets overlapping in both the old and elderly categories among both females and males, related to Figure 1.
Female and Male age 65-89 and 90-106 DEGs overlaps
Probe set	Symbol	Chr. Loc.	logFC Female Age 65-84	logFC Female Age85-105	logFC Male Age65-84	logFC Male Age85-105	Change in all age and sex groups
1552293_at	TMEM196	chr7:19719315-19773617	-0.4042	-0.373728	-0.279813	-0.392944	Downregulated in all groups
1552924_a_at	PITPNM2	chr12:122983480-123151090	-0.585016	-0.525415	-0.394419	-0.544902	Downregulated in all groups
201309_x_at	NREP	chr5:111662621-111997464	-1.07117	-1.10761	-1.17164	-1.43254	Downregulated in all groups
203367_at	DUSP14	chr17:37494470-37518136	-0.597847	-0.433613	-0.328362	-0.413572	Downregulated in all groups
204723_at	SCN3B	chr11:123629187-123655244	-0.805821	-0.693853	-0.462973	-0.604449	Downregulated in all groups
205591_at	OLFM1	chr9:135075422-135121180	-0.647565	-0.537938	-0.526093	-0.545515	Downregulated in all groups
205625_s_at	CALB1	chr8:90058608-90095475	-1.42871	-1.93869	-1.51905	-1.44836	Downregulated in all groups
205626_s_at	CALB1	chr8:90058608-90095475	-1.37944	-2.20402	-1.50595	-1.51857	Downregulated in all groups
205630_at	CRH	chr8:66176376-66178464	-2.13608	-1.60238	-1.17482	-1.38543	Downregulated in all groups
205874_at	ITPKA	chr15:41493393-41503551	-0.691376	-0.714041	-0.370824	-0.541149	Downregulated in all groups
206023_at	NMU	chr4:55595229-55636698	-0.826597	-0.642848	-0.736975	-0.569863	Downregulated in all groups
206208_at	CA4	chr17:60149942-60170899	-0.846643	-0.697493	-0.375144	-0.75449	Downregulated in all groups
206209_s_at	CA4	chr17:60149942-60170899	-1.01533	-0.702431	-0.637478	-0.946021	Downregulated in all groups
206577_at	VIP	chr6:152750797-152759765	-1.47003	-1.39078	-1.18799	-1.01184	Downregulated in all groups
208116_s_at	MAN1A1	chr6:119177205-119349761	-0.879014	-0.964684	-0.588552	-0.679064	Downregulated in all groups
209869_at	ADRA2A	chr10:111077029-111080907	-0.769136	-0.683388	-0.608488	-0.667891	Downregulated in all groups
210182_at	CENPS-CORT	chr1:10430102-10452153	-0.679157	-0.564457	-0.328735	-0.416098	Downregulated in all groups
210675_s_at	PTPRR	chr12:70638073-70920738	-0.908794	-0.776006	-0.683669	-0.695558	Downregulated in all groups
213131_at	OLFM1	chr9:135075422-135121180	-0.589455	-0.591949	-0.293138	-0.623803	Downregulated in all groups
213325_at	NECTIN3	chr3:111070071-111275563	-1.12091	-1.25004	-1.06072	-1.03791	Downregulated in all groups
213327_s_at	USP12	chr13:27066156-27171811	-0.400561	-0.348303	-0.342509	-0.455536	Downregulated in all groups
213496_at	PLPPR4	chr1:99264292-99309590	-0.799086	-0.724451	-0.602061	-0.673844	Downregulated in all groups
213791_at	PENK	chr8:56436674-56446671	-0.996766	-0.935778	-0.906202	-0.859209	Downregulated in all groups
214811_at	RIMBP2	chr12:130396133-130768228	-0.735507	-0.612659	-0.499843	-0.426882	Downregulated in all groups
218623_at	NSG2	chr5:174045706-174243501	-0.567545	-0.457327	-0.473639	-0.65305	Downregulated in all groups
218866_s_at	POLR3K	chr16:46407-53608	-0.511506	-0.508937	-0.491784	-0.584638	Downregulated in all groups
218868_at	ACTR3B	chr7:152759749-152855378	-0.634212	-0.982436	-0.637588	-0.756735	Downregulated in all groups
218888_s_at	NETO2	chr16:47077703-47143945	-1.0136	-0.969137	-0.624318	-0.944521	Downregulated in all groups
220331_at	CYP46A1	chr14:99684298-99727301	-0.635454	-0.742031	-0.293322	-0.372943	Downregulated in all groups
220889_s_at	CA10	chr17:51630313-52160017	-0.753446	-1.02617	-0.8126	-1.08867	Downregulated in all groups
221904_at	FAM131A	chr3:184335926-184348421	-0.703579	-0.431671	-0.497981	-0.50268	Downregulated in all groups
222774_s_at	NETO2	chr16:47077703-47143945	-1.23694	-1.30319	-0.89375	-1.09308	Downregulated in all groups
223383_at	ZNRF1	chr16:74999024-75110994	-0.634815	-0.408583	-0.37213	-0.633047	Downregulated in all groups
224896_s_at	TTL	chr2:112482156-112541739	-0.479058	-0.666975	-0.28215	-0.457375	Downregulated in all groups
224908_s_at	TTL	chr2:112482156-112541739	-0.631224	-0.749724	-0.378652	-0.514491	Downregulated in all groups
225739_at	RAB11FIP4	chr17:31391675-31538211	-0.473472	-0.550322	-0.35688	-0.412874	Downregulated in all groups
227015_at	ASPHD2	chr22:26429260-26445015	-0.542298	-0.720547	-0.325924	-0.652135	Downregulated in all groups
227408_s_at	SNX25	chr4:185204237-185370185	-0.54095	-0.494696	-0.310764	-0.358254	Downregulated in all groups
228135_at	C1orf52	chr1:85249953-85259672	-0.405993	-0.391452	-0.388549	-0.312755	Downregulated in all groups
228368_at	ARHGAP20	chr11:110577042-110713189	-0.863491	-0.718944	-0.711272	-1.00066	Downregulated in all groups
229430_at	VXN	chr8:66492326-66518524	-0.394852	-0.453365	-0.317615	-0.263303	Downregulated in all groups
230765_at	NWD2	chr4:37244743-37449463	-0.862317	-1.08987	-0.408311	-0.766896	Downregulated in all groups
230923_at	TAFA1	chr3:67991544-68545621	-0.773152	-0.842116	-0.586305	-1.00151	Downregulated in all groups
231186_at	LINC00643	chr14:62075340-62128421	-0.528644	-0.559411	-0.443204	-0.43456	Downregulated in all groups
231935_at	ARPP21	chr3:35638945-35794496	-0.680871	-0.693988	-0.450816	-0.837301	Downregulated in all groups
235591_at	SSTR1	chr14:38207904-38213067	-0.845535	-1.07643	-0.907943	-0.816167	Downregulated in all groups
236377_at	TMEM132D	chr12:129071725-129904025	-0.524429	-0.605805	-0.600294	-0.754524	Downregulated in all groups
244675_at	RGS8	chr1:182641816-182684587	-0.811555	-0.645841	-0.494668	-0.518428	Downregulated in all groups
823_at	CX3CL1	chr16:57372477-57385044	-0.672432	-0.633198	-0.312231	-0.461364	Downregulated in all groups
201302_at	ANXA4	chr2:69644425-69827112	0.762741	0.728826	0.537156	0.847295	Upregulated in all groups
201924_at	AFF1	chr4:86935002-87141039	0.789013	0.705839	0.635502	0.758577	Upregulated in all groups
202975_s_at	RHOBTB3	chr5:95713522-95824383	1.11285	1.16293	0.740197	1.05676	Upregulated in all groups
203038_at	PTPRK	chr6:127968779-128524810	0.537116	0.442103	0.485215	0.332951	Upregulated in all groups
203540_at	GFAP	chr17:44903159-44916937	1.47817	1.0455	0.900947	1.12542	Upregulated in all groups
203723_at	ITPKB	chr1:226631690-226739323	1.23789	1.01871	1.00699	1.10868	Upregulated in all groups
204041_at	MAOB	chrX:43766610-43882450	0.711994	0.50155	0.365442	0.515508	Upregulated in all groups
208877_at	PAK2	chr3:196739857-196832647	0.590856	0.408225	0.490595	0.564205	Upregulated in all groups
210817_s_at	CALCOCO2	chr17:48831018-48866522	0.619143	0.584255	0.332282	0.441057	Upregulated in all groups
212586_at	CAST	chr5:96525267-96779595	0.544134	0.435803	0.437289	0.446624	Upregulated in all groups
213096_at	TMCC2	chr1:205227946-205285632	0.430541	0.395945	0.415061	0.377951	Upregulated in all groups
216048_s_at	RHOBTB3	chr5:95713522-95824383	1.08511	0.984393	0.665677	0.863595	Upregulated in all groups
219939_s_at	CSDE1	chr1:114716913-114758676	0.537023	0.350963	0.353277	0.498757	Upregulated in all groups
222473_s_at	ERBIN	chr5:65883128-66082546	1.06831	0.922565	0.768552	0.999255	Upregulated in all groups
224840_at	FKBP5	chr6:35573585-35728583	1.78444	2.09888	1.27952	1.78377	Upregulated in all groups
224856_at	FKBP5	chr6:35573585-35728583	1.48564	1.70736	0.991947	1.2636	Upregulated in all groups
225202_at	RHOBTB3	chr5:95713522-95824383	1.25012	1.10756	0.678494	1.0567	Upregulated in all groups
228501_at	GALNT15	chr3:16174680-16231992	1.12119	0.799085	0.63139	0.915436	Upregulated in all groups
229799_s_at	NCAM1	chr11:112961247-113278436	0.749294	0.597814	0.733347	0.948543	Upregulated in all groups
236361_at	GALNT15	chr3:16174680-16231992	0.944485	0.721789	0.553333	0.644229	Upregulated in all groups
