# Supplementary material for: Genome-wide transcriptome profiling and development of age prediction models in the human brain
Source: Aging (Albany NY). 2024 Feb 28;16(5):4075–94. doi: 10.18632/aging.205609 (PMC10968712; doi:10.18632/aging.205609)
Supplement: Supplementary Table 6 [file aging-16-205609-s007.xlsx]

## Sheet: Sheet1
Supplementary Table 6. Univariate linear regression models of each probe set, in the overall population and stratified by sex, related to Figures 1 and 2.
Probe Set ID	Gene Symbol	Intercept-All	Age Estimate-All	Age adj.P-val-All	R-sq.-All	Intercept-Female	Age Estimate-Female	Age adj.P-val-Female	R-sq.-Female	Intercept-Male	Age Estimate-Male	Age adj.P-val-Male	R-sq.-Male	Sex-specific DEG and linear regression?	Female-only old and elderly 1.2-Fold DEG?	Male-only old and elderly 1.2-Fold DEG?
1566989_at	ARID1B	5.774	0.003	0.0573654	0.07	5.512	0.007	0.00623644	0.386	5.974	-0.001	0.623189	0.011	Female-specific	Yes	No
201481_s_at	PYGB	8.874	0.005	0.000242238	0.205	8.758	0.007	0.0013813	0.485	8.963	0.003	0.142231	0.074	Female-specific	Yes	No
202545_at	PRKCD	6.631	-0.007	5.9747e-05	0.237	6.888	-0.011	0.00034463	0.553	6.458	-0.005	0.10208	0.089	Female-specific	Yes	No
203124_s_at	SLC11A2	8.165	0.005	0.000717277	0.179	7.885	0.009	0.0018488	0.464	8.356	0.002	0.332083	0.035	Female-specific	Yes	No
204392_at	CAMK1	8.272	-0.006	7.32662e-05	0.232	8.476	-0.009	0.00256982	0.442	8.135	-0.004	0.0697906	0.107	Female-specific	Yes	No
210408_s_at	CPNE6	8.313	-0.006	0.00139023	0.163	8.574	-0.009	0.00435696	0.411	8.167	-0.005	0.107712	0.087	Female-specific	Yes	No
213338_at	TMEM158	8.615	-0.006	0.00665009	0.126	8.999	-0.012	0.00496815	0.403	8.342	-0.002	0.654132	0.009	Female-specific	Yes	No
214595_at	KCNG1	7.092	-0.013	2.30641e-06	0.308	7.631	-0.021	0.00021954	0.579	6.716	-0.006	0.0510637	0.122	Female-specific	Yes	No
214965_at	SPATA2L	7.891	-0.007	0.00143487	0.163	8.213	-0.012	0.00702452	0.378	7.638	-0.002	0.469445	0.021	Female-specific	Yes	No
220677_s_at	ADAMTS8	7.041	-0.005	0.00317743	0.144	7.332	-0.008	0.00741394	0.374	6.862	-0.003	0.24724	0.048	Female-specific	Yes	No
223226_x_at	SSBP4	8.817	-0.005	0.000136416	0.218	9.003	-0.008	0.000488453	0.537	8.655	-0.001	0.468894	0.021	Female-specific	Yes	No
223382_s_at	ZNRF1	8.446	-0.005	0.000152232	0.215	8.639	-0.009	0.000932571	0.506	8.3	-0.003	0.199684	0.058	Female-specific	Yes	No
227530_at	AKAP12	9.495	0.004	0.00123782	0.166	9.328	0.007	0.0085117	0.365	9.624	0.002	0.303993	0.039	Female-specific	Yes	No
237939_at	EPHA5	6.885	-0.009	2.03127e-05	0.262	7.099	-0.013	0.002472	0.444	6.707	-0.006	0.0574762	0.116	Female-specific	Yes	No
1552344_s_at	CNOT7	6.613	-0.008	0.000688466	0.18	6.512	-0.005	0.359622	0.078	6.732	-0.011	0.000448689	0.321	Male-specific	No	Yes
1552618_at	STX6	7.693	-0.005	0.00130784	0.165	7.656	-0.002	0.324219	0.087	7.778	-0.008	0.000541545	0.313	Male-specific	No	Yes
1552660_a_at	C5orf22	6.754	-0.009	0.000111168	0.223	6.685	-0.006	0.160583	0.146	6.872	-0.013	0.000271069	0.339	Male-specific	No	Yes
1552752_a_at	CADM2	7.884	-0.007	0.00340704	0.142	7.8	-0.003	0.593121	0.035	8.029	-0.011	0.000287422	0.337	Male-specific	No	Yes
1552754_a_at	CADM2	9.159	-0.007	0.000952734	0.172	9.095	-0.003	0.379018	0.074	9.28	-0.011	0.000289566	0.337	Male-specific	No	Yes
1552774_a_at	SLC25A27	6.694	-0.01	5.12509e-06	0.292	6.694	-0.008	0.106652	0.178	6.767	-0.013	3.44596e-06	0.505	Male-specific	No	Yes
1552978_a_at	SCAMP1	8.735	-0.013	0.000103922	0.224	8.624	-0.008	0.249781	0.109	8.91	-0.018	5.82235e-05	0.395	Male-specific	No	Yes
1553194_at	NEGR1	8.384	-0.015	1.39494e-05	0.27	8.352	-0.012	0.0589772	0.225	8.495	-0.019	0.000172414	0.356	Male-specific	No	Yes
1553218_a_at	ZNF512	8.463	-0.005	0.000492023	0.188	8.43	-0.002	0.281419	0.1	8.554	-0.008	8.73948e-05	0.38	Male-specific	No	Yes
1553533_at	JPH1	5.374	-0.005	0.000118869	0.221	5.332	-0.004	0.148637	0.152	5.435	-0.007	0.000523362	0.315	Male-specific	No	Yes
1553603_s_at	ATL2	6.682	-0.01	2.91025e-05	0.253	6.626	-0.009	0.102735	0.181	6.756	-0.013	0.000294003	0.336	Male-specific	No	Yes
1553698_a_at	CCSAP	6.183	-0.013	7.82862e-06	0.283	6.035	-0.01	0.122481	0.168	6.315	-0.016	4.32371e-05	0.408	Male-specific	No	Yes
1553704_x_at	ZNF791	7.115	0.005	0.000839957	0.175	7.141	0.004	0.316221	0.089	7.065	0.007	0.000494892	0.317	Male-specific	No	Yes
1553959_a_at	B3GALT6	8.122	-0.004	3.27109e-05	0.251	8.05	-0.003	0.194978	0.13	8.19	-0.006	9.72867e-05	0.377	Male-specific	No	Yes
1554105_at	TMEM185A	6.251	-0.004	0.000593852	0.184	6.211	-0.003	0.301953	0.093	6.307	-0.006	0.000608045	0.309	Male-specific	No	Yes
1554161_at	SLC25A27	7.372	-0.013	1.62662e-06	0.315	7.367	-0.009	0.0818878	0.199	7.479	-0.017	1.13862e-06	0.546	Male-specific	No	Yes
1554248_at	ZNF638	6.007	-0.003	0.0167784	0.103	5.957	-0.001	0.822214	0.009	6.096	-0.006	0.000755847	0.3	Male-specific	No	Yes
1554256_a_at	PCNX2	6.211	-0.007	6.604e-05	0.235	6.205	-0.005	0.218099	0.121	6.26	-0.009	8.40705e-06	0.466	Male-specific	No	Yes
1554462_a_at	DNAJB9	7.62	-0.009	2.59598e-05	0.256	7.573	-0.007	0.0727572	0.208	7.712	-0.012	0.000236558	0.344	Male-specific	No	Yes
1554471_a_at	ANKRD13C	7.032	-0.006	0.000338736	0.197	6.916	-0.003	0.432214	0.062	7.145	-0.008	0.000118371	0.37	Male-specific	No	Yes
1554592_a_at	SLC1A6	6.599	-0.012	3.23202e-05	0.251	6.666	-0.011	0.0924844	0.189	6.622	-0.014	9.04235e-05	0.379	Male-specific	No	Yes
1554607_at	CNKSR2	7.356	-0.012	2.5294e-05	0.256	7.299	-0.01	0.0631835	0.219	7.457	-0.016	0.000457099	0.32	Male-specific	No	Yes
1554661_s_at	CNST	6.364	-0.008	0.000142724	0.217	6.152	-0.002	0.581856	0.037	6.592	-0.014	1.125e-05	0.456	Male-specific	No	Yes
1554834_a_at	RASSF5	6.134	-0.009	3.21366e-06	0.301	6.148	-0.007	0.0585708	0.225	6.197	-0.012	7.19119e-06	0.472	Male-specific	No	Yes
1555201_a_at	RMND1	6.884	-0.005	0.000388836	0.193	6.847	-0.002	0.322039	0.088	6.981	-0.009	4.50823e-05	0.406	Male-specific	No	Yes
1555202_a_at	RPRD1A	6.494	-0.011	2.01217e-06	0.311	6.406	-0.009	0.0520681	0.234	6.585	-0.014	6.91699e-05	0.389	Male-specific	No	Yes
1555467_a_at	CELF1	7.34	-0.007	9.36743e-05	0.227	7.27	-0.005	0.14179	0.156	7.413	-0.009	0.000761411	0.3	Male-specific	No	Yes
1555514_a_at	PIAS2	7.364	-0.008	4.8285e-05	0.242	7.297	-0.005	0.168662	0.142	7.495	-0.013	3.29926e-05	0.419	Male-specific	No	Yes
1555801_s_at	ZNF385B	8.151	-0.012	7.76818e-05	0.231	8.108	-0.01	0.153579	0.15	8.244	-0.016	0.000224228	0.346	Male-specific	No	Yes
1555910_at	PTCD2	7.068	-0.006	0.000111331	0.223	7.062	-0.004	0.173108	0.14	7.114	-0.007	0.000128299	0.366	Male-specific	No	Yes
1555961_a_at	HINT1	12.111	-0.003	0.00111219	0.169	12.015	-0.001	0.576833	0.038	12.204	-0.006	0.00047231	0.319	Male-specific	No	Yes
1556029_s_at	NMNAT2	7.363	-0.014	0.000443051	0.19	7.151	-0.007	0.419836	0.065	7.633	-0.022	0.000101158	0.375	Male-specific	No	Yes
1557943_at	CNP	7.778	0.013	3.07591e-05	0.252	7.803	0.01	0.0811597	0.2	7.674	0.017	0.000215969	0.348	Male-specific	No	Yes
1557986_s_at	SMCR8	5.491	-0.003	0.00605868	0.128	5.429	-0.001	0.704569	0.021	5.585	-0.006	0.000605415	0.309	Male-specific	No	Yes
1558034_s_at	CP	3.568	0.011	2.0143e-05	0.262	3.619	0.009	0.0846305	0.196	3.513	0.012	0.000334903	0.331	Male-specific	No	Yes
1558093_s_at	MATR3	9.055	-0.013	2.18871e-05	0.26	9.063	-0.011	0.0577319	0.226	9.124	-0.016	0.000301998	0.335	Male-specific	No	Yes
1558154_at	LLGL2	4.617	0.003	0.0807246	0.061	4.75	-0.001	0.697156	0.022	4.459	0.007	0.00026823	0.34	Male-specific	No	Yes
1558254_s_at	SRPK2	9.367	-0.009	1.65406e-05	0.266	9.384	-0.007	0.0712417	0.21	9.427	-0.012	5.42574e-05	0.398	Male-specific	No	Yes
1558293_at	BTBD8	9.082	-0.01	8.47309e-05	0.229	8.906	-0.005	0.347807	0.081	9.276	-0.015	2.71604e-05	0.426	Male-specific	No	Yes
1558620_at	ZNF621	5.451	0.006	0.000643533	0.182	5.486	0.004	0.264373	0.105	5.361	0.009	0.000479639	0.318	Male-specific	No	Yes
1558680_s_at	PDE1A	7.646	-0.014	0.000304037	0.199	7.56	-0.009	0.220889	0.12	7.815	-0.019	0.000449886	0.321	Male-specific	No	Yes
1558959_at	FAM126B	7.396	-0.013	2.03127e-05	0.262	7.299	-0.009	0.11952	0.169	7.551	-0.018	6.65113e-05	0.391	Male-specific	No	Yes
1559481_at	CHIC1	5.392	-0.009	4.79395e-05	0.242	5.331	-0.006	0.187904	0.133	5.503	-0.012	4.10632e-05	0.41	Male-specific	No	Yes
1562713_a_at	NETO1	6.966	-0.007	0.000124771	0.22	6.838	-0.004	0.161114	0.146	7.097	-0.01	0.000592492	0.31	Male-specific	No	Yes
1564053_a_at	YTHDF3	6.138	-0.012	3.29067e-05	0.25	6.025	-0.01	0.0950949	0.187	6.244	-0.015	0.000590896	0.31	Male-specific	No	Yes
1564158_a_at	VAC14-AS1	4.141	0.005	0.00415471	0.137	4.246	0.002	0.660832	0.026	4.009	0.009	0.000644873	0.306	Male-specific	No	Yes
1564746_at	SLC9B2	6.327	-0.005	0.00678796	0.125	6.219	-0.002	0.723935	0.019	6.459	-0.009	0.000269778	0.339	Male-specific	No	Yes
1566509_s_at	FBXO9	9.459	-0.01	0.000337917	0.197	9.504	-0.008	0.169955	0.141	9.513	-0.013	0.000465113	0.319	Male-specific	No	Yes
1568603_at	CADPS	9.247	-0.014	0.000537414	0.186	9.197	-0.01	0.25227	0.109	9.388	-0.019	0.000582571	0.311	Male-specific	No	Yes
1568933_at	LYPD8	6.102	-0.006	0.00230619	0.151	5.964	-0.003	0.597523	0.035	6.245	-0.01	0.00029315	0.336	Male-specific	No	Yes
1570253_a_at	RHEBL1	6.396	-0.009	2.69577e-05	0.255	6.312	-0.006	0.130691	0.162	6.496	-0.011	0.000135545	0.364	Male-specific	No	Yes
200056_s_at	C1D	8.676	-0.008	1.90051e-05	0.263	8.653	-0.006	0.0775045	0.203	8.745	-0.011	0.000112264	0.372	Male-specific	No	Yes
200093_s_at	HINT1	11.509	-0.005	0.000283811	0.201	11.431	-0.003	0.275659	0.101	11.598	-0.007	0.000448941	0.321	Male-specific	No	Yes
200624_s_at	MATR3	11.206	-0.005	0.000297234	0.2	11.188	-0.003	0.128224	0.164	11.263	-0.007	0.00073842	0.301	Male-specific	No	Yes
200632_s_at	NDRG1	9.005	0.009	2.04363e-05	0.261	9.03	0.007	0.0594861	0.224	8.927	0.012	0.000220784	0.347	Male-specific	No	Yes
200676_s_at	UBE2L3	8.216	0.005	0.000686073	0.18	8.31	0.002	0.384508	0.073	8.116	0.007	0.000676721	0.305	Male-specific	No	Yes
200710_at	ACADVL	8.076	0.007	0.000314177	0.199	8.041	0.005	0.150947	0.151	8.04	0.009	0.00047231	0.319	Male-specific	No	Yes
200720_s_at	ACTR1A	9.013	-0.007	4.16131e-05	0.245	9.003	-0.005	0.139725	0.157	9.057	-0.008	7.81068e-05	0.385	Male-specific	No	Yes
200731_s_at	PTP4A1	8.144	-0.008	1.92642e-05	0.263	8.192	-0.007	0.0500485	0.237	8.169	-0.01	0.00017877	0.354	Male-specific	No	Yes
200737_at	PGK1	9.588	-0.008	0.000158285	0.215	9.548	-0.006	0.167014	0.143	9.651	-0.01	0.00063275	0.307	Male-specific	No	Yes
200738_s_at	PGK1	11.866	-0.005	0.000438861	0.191	11.808	-0.003	0.318455	0.089	11.948	-0.008	0.000301704	0.335	Male-specific	No	Yes
200783_s_at	STMN1	10.174	-0.006	5.5447e-05	0.239	10.176	-0.004	0.0541883	0.231	10.219	-0.008	0.000443545	0.321	Male-specific	No	Yes
200813_s_at	PAFAH1B1	10.656	-0.008	3.78129e-05	0.247	10.614	-0.006	0.151991	0.15	10.743	-0.011	6.15278e-05	0.393	Male-specific	No	Yes
200815_s_at	PAFAH1B1	7.993	-0.008	0.000198013	0.209	7.886	-0.005	0.301814	0.094	8.1	-0.01	0.000158153	0.359	Male-specific	No	Yes
200816_s_at	PAFAH1B1	11.068	-0.006	4.25233e-05	0.245	11.056	-0.004	0.118647	0.17	11.119	-0.008	0.000105213	0.374	Male-specific	No	Yes
200827_at	PLOD1	6.637	0.004	0.00060948	0.183	6.717	0.002	0.484883	0.052	6.543	0.007	0.00012681	0.367	Male-specific	No	Yes
200870_at	STRAP	10.871	-0.004	3.27553e-05	0.25	10.816	-0.002	0.151371	0.151	10.942	-0.006	6.2306e-05	0.393	Male-specific	No	Yes
200883_at	UQCRC2	9.9	-0.008	1.32845e-05	0.271	9.822	-0.005	0.129705	0.163	10.013	-0.011	2.58834e-05	0.427	Male-specific	No	Yes
200907_s_at	PALLD	6.729	0.01	0.000278796	0.201	6.726	0.007	0.16056	0.146	6.638	0.014	0.000484968	0.318	Male-specific	No	Yes
200915_x_at	KTN1	9.538	0.006	0.000131331	0.219	9.58	0.004	0.135922	0.159	9.467	0.008	0.000569646	0.311	Male-specific	No	Yes
200978_at	MDH1	13.02	-0.005	0.000609653	0.183	12.95	-0.003	0.341961	0.083	13.113	-0.008	0.00046713	0.319	Male-specific	No	Yes
201020_at	YWHAH	12.62	-0.008	3.45414e-05	0.249	12.638	-0.006	0.0573848	0.227	12.67	-0.01	0.000210546	0.349	Male-specific	No	Yes
201021_s_at	DSTN	11.553	-0.007	0.000131332	0.219	11.556	-0.006	0.0874836	0.194	11.611	-0.01	0.000672589	0.305	Male-specific	No	Yes
201048_x_at	RAB6A	8.837	-0.018	1.28487e-06	0.321	8.766	-0.014	0.053668	0.231	8.977	-0.022	1.48277e-05	0.447	Male-specific	No	Yes
201054_at	HNRNPA0	10.711	-0.007	2.20245e-06	0.309	10.662	-0.005	0.0887223	0.193	10.775	-0.009	1.12261e-05	0.457	Male-specific	No	Yes
201074_at	SMARCC1	6.259	0.006	0.000152406	0.215	6.299	0.004	0.168517	0.142	6.193	0.008	0.000453816	0.32	Male-specific	No	Yes
201089_at	ATP6V1B2	11.6	-0.007	0.00049671	0.188	11.5	-0.003	0.423344	0.064	11.734	-0.011	0.000115722	0.371	Male-specific	No	Yes
201091_s_at	CBX3	7.861	-0.006	0.000311703	0.199	7.795	-0.004	0.257848	0.107	7.942	-0.008	0.00055851	0.312	Male-specific	No	Yes
201120_s_at	PGRMC1	9.577	-0.009	1.04856e-05	0.276	9.528	-0.007	0.0812184	0.199	9.668	-0.012	6.31435e-05	0.393	Male-specific	No	Yes
201184_s_at	CHD4	8.169	0.004	6.4188e-05	0.235	8.195	0.003	0.130158	0.163	8.124	0.006	0.000265885	0.34	Male-specific	No	Yes
201192_s_at	PITPNA	8.848	-0.008	2.7898e-06	0.304	8.874	-0.007	0.050315	0.236	8.866	-0.009	3.03786e-05	0.421	Male-specific	No	Yes
201212_at	LGMN	7.925	-0.006	0.000120079	0.221	7.915	-0.005	0.136158	0.159	7.979	-0.008	0.000333032	0.331	Male-specific	No	Yes
201219_at	CTBP2	5.403	0.006	4.71579e-05	0.242	5.409	0.004	0.0885395	0.193	5.359	0.007	0.000240453	0.343	Male-specific	No	Yes
201254_x_at	RPS6	10.98	0.006	1.50783e-05	0.268	10.958	0.005	0.0515876	0.234	10.964	0.007	0.000209079	0.349	Male-specific	No	Yes
201282_at	OGDH	7.607	0.005	0.000398431	0.193	7.654	0.003	0.366422	0.076	7.532	0.007	8.74324e-05	0.38	Male-specific	No	Yes
201320_at	SMARCC2	8.3	0.004	4.55248e-05	0.243	8.333	0.003	0.146258	0.154	8.259	0.006	0.000191541	0.352	Male-specific	No	Yes
201413_at	HSD17B4	9.163	0.006	3.11852e-06	0.302	9.155	0.005	0.0661658	0.216	9.118	0.008	5.75607e-06	0.48	Male-specific	No	Yes
201443_s_at	ATP6AP2	11.634	-0.004	0.000182051	0.211	11.591	-0.002	0.186946	0.133	11.699	-0.006	0.000289566	0.337	Male-specific	No	Yes
201512_s_at	TOMM70	7.949	-0.013	9.70696e-07	0.327	7.821	-0.009	0.102866	0.181	8.108	-0.018	2.56902e-06	0.513	Male-specific	No	Yes
201532_at	PSMA3	8.796	-0.005	0.000217081	0.207	8.701	-0.002	0.241361	0.112	8.886	-0.007	0.000637361	0.307	Male-specific	No	Yes
201607_at	PWP1	7.801	-0.005	0.000595682	0.184	7.706	-0.002	0.471431	0.055	7.914	-0.008	0.000176316	0.355	Male-specific	No	Yes
201630_s_at	ACP1	9.904	-0.005	0.000177962	0.212	9.839	-0.003	0.163098	0.145	9.981	-0.007	0.000696928	0.303	Male-specific	No	Yes
201657_at	ARL1	7.158	-0.008	0.000419462	0.192	7.098	-0.006	0.265947	0.104	7.254	-0.011	0.000499444	0.317	Male-specific	No	Yes
201659_s_at	ARL1	7.99	-0.007	9.95092e-06	0.277	8.01	-0.006	0.0529401	0.232	8.015	-0.008	0.000108469	0.373	Male-specific	No	Yes
201686_x_at	API5	7.613	-0.005	0.000254374	0.203	7.539	-0.003	0.272933	0.102	7.714	-0.008	0.000226138	0.346	Male-specific	No	Yes
201688_s_at	TPD52	9.739	-0.011	0.000230889	0.206	9.609	-0.006	0.273357	0.102	9.912	-0.016	0.000232179	0.345	Male-specific	No	Yes
201708_s_at	NIPSNAP1	8.621	-0.007	1.44363e-05	0.269	8.634	-0.005	0.0622327	0.22	8.666	-0.009	5.8909e-05	0.395	Male-specific	No	Yes
201712_s_at	RANBP2	8.05	-0.005	0.000248619	0.204	7.957	-0.002	0.374699	0.075	8.174	-0.009	6.31435e-05	0.393	Male-specific	No	Yes
201725_at	CDC123	8.98	-0.004	0.000157158	0.215	8.937	-0.003	0.196323	0.129	9.048	-0.006	0.000222337	0.347	Male-specific	No	Yes
201778_s_at	EFCAB14	9.256	0.006	0.000166248	0.213	9.287	0.004	0.226303	0.118	9.18	0.009	0.000115722	0.371	Male-specific	No	Yes
201779_s_at	RNF13	8.709	0.009	6.95767e-05	0.233	8.7	0.007	0.0774196	0.203	8.646	0.012	0.000386494	0.326	Male-specific	No	Yes
201801_s_at	SLC29A1	6.203	-0.007	0.000223979	0.206	6.117	-0.005	0.302883	0.093	6.302	-0.01	0.000132299	0.365	Male-specific	No	Yes
201823_s_at	RNF14	8.319	-0.011	2.53541e-06	0.306	8.247	-0.008	0.0732727	0.208	8.431	-0.015	1.78005e-05	0.439	Male-specific	No	Yes
201840_at	NEDD8	10.114	-0.003	0.00165444	0.159	10.035	-0.001	0.673732	0.025	10.207	-0.006	0.000183313	0.353	Male-specific	No	Yes
201848_s_at	BNIP3	9.376	-0.005	0.000366055	0.195	9.267	-0.002	0.513984	0.047	9.498	-0.008	5.18014e-05	0.399	Male-specific	No	Yes
202019_s_at	LANCL1	8.287	-0.01	2.86553e-05	0.254	8.171	-0.006	0.16254	0.145	8.423	-0.013	8.08628e-05	0.384	Male-specific	No	Yes
202035_s_at	SFRP1	4.312	0.004	0.00476146	0.134	4.393	0.001	0.695304	0.022	4.197	0.008	0.000547321	0.313	Male-specific	No	Yes
202069_s_at	IDH3A	9.066	-0.009	4.48497e-05	0.243	9.005	-0.006	0.215405	0.122	9.169	-0.012	2.35697e-05	0.431	Male-specific	No	Yes
202085_at	TJP2	6.92	0.015	0.000207495	0.208	7.008	0.009	0.242605	0.112	6.716	0.022	0.00011356	0.371	Male-specific	No	Yes
202101_s_at	RALB	8.456	-0.007	0.000105183	0.224	8.473	-0.006	0.0909846	0.191	8.505	-0.01	0.00042507	0.323	Male-specific	No	Yes
202132_at	WWTR1	5.494	0.004	0.00292796	0.146	5.561	0.002	0.549956	0.042	5.401	0.007	0.000693574	0.304	Male-specific	No	Yes
202133_at	WWTR1	5.473	0.015	2.49681e-05	0.257	5.485	0.012	0.071107	0.21	5.374	0.019	0.000239676	0.344	Male-specific	No	Yes
202142_at	COPS8	9.898	-0.006	0.000162085	0.214	9.851	-0.003	0.0626303	0.22	9.99	-0.009	0.00039468	0.325	Male-specific	No	Yes
202162_s_at	CNOT8	7.301	-0.005	0.000898705	0.174	7.165	-0.001	0.702091	0.021	7.432	-0.008	4.57857e-05	0.405	Male-specific	No	Yes
202166_s_at	PPP1R2	8.537	-0.01	6.94706e-06	0.285	8.515	-0.008	0.0678373	0.214	8.609	-0.013	5.51896e-05	0.397	Male-specific	No	Yes
202170_s_at	AASDHPPT	9.535	-0.01	4.93992e-05	0.241	9.503	-0.007	0.136111	0.159	9.648	-0.014	5.61711e-05	0.396	Male-specific	No	Yes
202199_s_at	SRPK1	7.207	-0.007	9.52958e-05	0.226	7.074	-0.002	0.429289	0.063	7.38	-0.012	7.71775e-06	0.47	Male-specific	No	Yes
202206_at	ARL4C	9.233	-0.01	7.53146e-05	0.231	9.295	-0.008	0.0705015	0.211	9.276	-0.013	0.000334903	0.331	Male-specific	No	Yes
202207_at	ARL4C	10.09	-0.01	4.52938e-06	0.294	10.067	-0.007	0.0942462	0.188	10.186	-0.014	5.02328e-06	0.488	Male-specific	No	Yes
202348_s_at	TOR1A	8.004	-0.005	2.08171e-05	0.261	7.957	-0.004	0.120606	0.169	8.068	-0.007	8.67032e-05	0.381	Male-specific	No	Yes
202374_s_at	RAB3GAP2	8.023	-0.007	0.000169363	0.213	7.93	-0.003	0.352585	0.08	8.145	-0.01	4.79814e-05	0.402	Male-specific	No	Yes
202507_s_at	SNAP25	13.18	-0.009	0.000152696	0.215	13.133	-0.006	0.175152	0.139	13.285	-0.013	0.000265911	0.34	Male-specific	No	Yes
202516_s_at	DLG1	7.63	-0.01	9.45885e-05	0.226	7.576	-0.009	0.136033	0.159	7.701	-0.012	0.000667259	0.305	Male-specific	No	Yes
202555_s_at	MYLK	7.621	0.007	0.00145629	0.162	7.794	0.003	0.552801	0.041	7.446	0.011	0.000615165	0.309	Male-specific	No	Yes
202595_s_at	LEPROTL1	7.228	-0.006	0.000326365	0.198	7.079	-0.003	0.491885	0.051	7.369	-0.01	5.14573e-05	0.4	Male-specific	No	Yes
202784_s_at	NNT	8.277	-0.009	1.92642e-05	0.263	8.16	-0.007	0.0622609	0.22	8.375	-0.011	0.000723445	0.302	Male-specific	No	Yes
202825_at	SLC25A4	10.449	-0.007	1.45999e-05	0.269	10.426	-0.005	0.0896973	0.192	10.512	-0.009	6.35157e-05	0.392	Male-specific	No	Yes
202931_x_at	BIN1	8.735	0.005	0.00204617	0.154	8.778	0.003	0.42671	0.063	8.644	0.008	0.000598815	0.31	Male-specific	No	Yes
202955_s_at	ARFGEF1	7.434	-0.006	5.28409e-05	0.24	7.348	-0.004	0.233712	0.115	7.529	-0.009	6.68261e-05	0.391	Male-specific	No	Yes
202960_s_at	MMUT	8.098	0.004	0.0038552	0.139	8.292	0	0.919125	0.002	7.926	0.008	0.000269778	0.339	Male-specific	No	Yes
203071_at	SEMA3B	6.687	0.007	0.000313259	0.199	6.781	0.003	0.375989	0.074	6.557	0.01	8.70099e-05	0.381	Male-specific	No	Yes
203072_at	MYO1E	5.302	0.005	0.00282331	0.147	5.281	0.003	0.335733	0.084	5.255	0.007	0.000636765	0.307	Male-specific	No	Yes
203094_at	MAD2L1BP	7.819	-0.007	2.60417e-06	0.305	7.743	-0.004	0.0650729	0.217	7.918	-0.01	1.7346e-05	0.441	Male-specific	No	Yes
203105_s_at	DNM1L	9.169	-0.007	2.78881e-05	0.254	9.103	-0.005	0.137918	0.158	9.247	-0.009	0.000121964	0.368	Male-specific	No	Yes
203112_s_at	NELFA	6.234	0.005	0.000955979	0.172	6.217	0.004	0.313313	0.09	6.199	0.007	0.000130949	0.365	Male-specific	No	Yes
203113_s_at	EEF1D	8.794	0.007	6.01001e-05	0.237	8.79	0.006	0.0707276	0.211	8.737	0.01	0.000344589	0.33	Male-specific	No	Yes
203158_s_at	GLS	9.381	-0.015	1.83685e-05	0.264	9.317	-0.012	0.0877258	0.194	9.503	-0.019	0.000152937	0.36	Male-specific	No	Yes
203185_at	RASSF2	7.927	0.011	9.10807e-05	0.227	7.997	0.007	0.125633	0.166	7.794	0.015	0.000301998	0.335	Male-specific	No	Yes
203218_at	MAPK9	9.306	-0.008	5.19019e-05	0.24	9.264	-0.006	0.119572	0.169	9.382	-0.01	0.000265885	0.34	Male-specific	No	Yes
203254_s_at	TLN1	5.156	0.009	0.000922519	0.173	5.2	0.005	0.30089	0.094	5.034	0.013	0.000541963	0.313	Male-specific	No	Yes
203333_at	KIFAP3	11.099	-0.009	5.9976e-06	0.288	10.983	-0.006	0.180025	0.136	11.233	-0.013	5.33964e-06	0.485	Male-specific	No	Yes
203377_s_at	CDC40	6.545	-0.011	1.5088e-06	0.317	6.47	-0.009	0.0819278	0.199	6.626	-0.013	9.70111e-06	0.461	Male-specific	No	Yes
203413_at	NELL2	12.213	-0.007	5.6235e-05	0.238	12.122	-0.004	0.0585708	0.225	12.327	-0.01	0.000399906	0.325	Male-specific	No	Yes
203484_at	SEC61G	9.41	-0.005	2.55975e-05	0.256	9.419	-0.004	0.0764938	0.204	9.438	-0.006	0.000127486	0.366	Male-specific	No	Yes
203513_at	SPG11	7.218	0.006	6.83602e-05	0.234	7.261	0.004	0.126279	0.165	7.147	0.008	0.000244394	0.343	Male-specific	No	Yes
203544_s_at	STAM	8.912	-0.005	3.49714e-05	0.249	8.869	-0.004	0.0609479	0.222	8.976	-0.007	0.000445552	0.321	Male-specific	No	Yes
203706_s_at	FZD7	4.399	0.01	0.00188495	0.156	4.639	0.004	0.577067	0.038	4.157	0.016	0.000702731	0.303	Male-specific	No	Yes
203798_s_at	VSNL1	13.096	-0.012	0.000429572	0.191	12.982	-0.006	0.208448	0.124	13.29	-0.018	0.000549111	0.313	Male-specific	No	Yes
203836_s_at	MAP3K5	7.751	0.006	0.000133702	0.218	7.814	0.004	0.186295	0.134	7.675	0.008	0.000454804	0.32	Male-specific	No	Yes
203843_at	RPS6KA3	7.445	-0.007	2.04363e-05	0.261	7.506	-0.007	0.0534571	0.232	7.446	-0.008	0.000179186	0.354	Male-specific	No	Yes
203846_at	TRIM32	7.605	-0.006	0.000148846	0.216	7.577	-0.003	0.209884	0.124	7.699	-0.009	3.56467e-05	0.415	Male-specific	No	Yes
203853_s_at	GAB2	7.902	0.006	0.000280627	0.201	7.936	0.004	0.165794	0.143	7.821	0.009	0.000455124	0.32	Male-specific	No	Yes
203854_at	CFI	4.338	0.007	8.22469e-05	0.23	4.345	0.006	0.14353	0.155	4.285	0.009	0.00018722	0.353	Male-specific	No	Yes
204036_at	LPAR1	7.39	0.015	0.000246213	0.204	7.53	0.008	0.288287	0.098	7.157	0.022	0.000123678	0.368	Male-specific	No	Yes
204037_at	LPAR1	7.579	0.009	0.00181737	0.157	7.681	0.004	0.464752	0.056	7.388	0.015	0.000337409	0.331	Male-specific	No	Yes
204062_s_at	ULK2	8.215	-0.006	9.19902e-07	0.328	8.119	-0.004	0.0502285	0.236	8.301	-0.008	3.30668e-05	0.418	Male-specific	No	Yes
204207_s_at	RNGTT	6.576	-0.007	0.000177378	0.212	6.513	-0.004	0.265733	0.104	6.674	-0.01	0.000117804	0.37	Male-specific	No	Yes
204344_s_at	SEC23A	7.594	-0.007	0.000172424	0.212	7.478	-0.004	0.362362	0.077	7.738	-0.011	5.05604e-05	0.4	Male-specific	No	Yes
204428_s_at	LCAT	4.904	0.004	0.00489842	0.133	5.059	0	0.968308	0	4.736	0.009	5.05604e-05	0.4	Male-specific	No	Yes
204552_at	INPP4A	9.065	-0.01	9.19386e-06	0.279	9.068	-0.008	0.0597185	0.224	9.127	-0.013	7.56941e-05	0.386	Male-specific	No	Yes
204591_at	CHL1	10.832	-0.007	1.41009e-05	0.27	10.789	-0.005	0.0511205	0.235	10.919	-0.01	9.58977e-05	0.377	Male-specific	No	Yes
204620_s_at	VCAN	7.01	0.011	0.000161147	0.214	6.971	0.008	0.125795	0.165	6.949	0.014	0.000373554	0.327	Male-specific	No	Yes
204726_at	CDH13	8.322	-0.008	2.28101e-05	0.259	8.344	-0.006	0.0698901	0.212	8.388	-0.011	3.73326e-05	0.413	Male-specific	No	Yes
204768_s_at	FEN1	6.922	-0.006	5.20852e-05	0.24	6.939	-0.004	0.0701407	0.211	6.962	-0.008	0.00018722	0.353	Male-specific	No	Yes
204771_s_at	TTF1	7.231	0.005	0.000255806	0.203	7.316	0.003	0.228401	0.117	7.142	0.007	0.000760158	0.3	Male-specific	No	Yes
204989_s_at	ITGB4	4.714	0.009	0.000135212	0.218	4.561	0.009	0.0684475	0.213	4.757	0.01	0.000698055	0.303	Male-specific	No	Yes
205060_at	PARG	6.592	-0.005	0.000109694	0.223	6.63	-0.005	0.113439	0.174	6.6	-0.006	0.000268377	0.34	Male-specific	No	Yes
205117_at	FGF1	8.884	0.012	0.000127403	0.219	8.952	0.007	0.173918	0.139	8.72	0.017	0.000119313	0.369	Male-specific	No	Yes
205248_at	DOP1B	6.061	-0.006	0.000175277	0.212	5.991	-0.004	0.256305	0.107	6.141	-0.008	0.000241788	0.343	Male-specific	No	Yes
205279_s_at	GLRB	9.933	-0.012	6.03283e-05	0.237	9.877	-0.008	0.143288	0.155	10.062	-0.016	0.00012033	0.369	Male-specific	No	Yes
205485_at	RYR1	6.055	0.01	0.000236406	0.205	6.329	0.004	0.460429	0.057	5.804	0.016	0.000131625	0.365	Male-specific	No	Yes
205568_at	AQP9	6.737	-0.006	0.00057268	0.185	6.685	-0.004	0.241305	0.112	6.829	-0.009	0.000749813	0.301	Male-specific	No	Yes
205803_s_at	TRPC1	7.684	-0.005	0.00629	0.127	7.499	-0.001	0.845462	0.007	7.843	-0.008	0.000340344	0.331	Male-specific	No	Yes
205810_s_at	WASL	6.794	-0.005	0.00021163	0.208	6.684	-0.002	0.419559	0.065	6.911	-0.008	7.434e-05	0.387	Male-specific	No	Yes
205902_at	KCNN3	6.588	0.013	3.55661e-06	0.299	6.723	0.009	0.0955419	0.187	6.431	0.017	2.45026e-05	0.43	Male-specific	No	Yes
205938_at	PPM1E	7.197	-0.012	1.14934e-05	0.274	7.066	-0.008	0.190156	0.132	7.354	-0.016	8.4641e-06	0.466	Male-specific	No	Yes
206046_at	ADAM23	8.433	-0.006	7.01478e-05	0.233	8.389	-0.004	0.0989498	0.184	8.519	-0.009	0.000232179	0.345	Male-specific	No	Yes
206232_s_at	B4GALT6	6.944	-0.009	0.000474278	0.189	6.736	-0.004	0.567043	0.039	7.166	-0.015	3.03786e-05	0.421	Male-specific	No	Yes
206233_at	B4GALT6	8.763	-0.011	3.68107e-05	0.248	8.692	-0.007	0.175704	0.138	8.89	-0.015	3.8792e-05	0.412	Male-specific	No	Yes
206235_at	LIG4	7.488	-0.008	2.47323e-05	0.257	7.425	-0.006	0.122391	0.168	7.549	-0.009	0.000175535	0.355	Male-specific	No	Yes
206376_at	SLC6A15	8.162	-0.01	0.00037138	0.194	7.996	-0.006	0.329604	0.086	8.327	-0.014	0.000420389	0.323	Male-specific	No	Yes
206383_s_at	G3BP2	7.739	-0.013	7.59037e-05	0.231	7.654	-0.01	0.151414	0.151	7.86	-0.017	0.000318072	0.333	Male-specific	No	Yes
206468_s_at	METTL13	7.393	-0.005	4.25151e-05	0.245	7.388	-0.003	0.0903173	0.191	7.452	-0.008	4.44113e-05	0.407	Male-specific	No	Yes
206473_at	MBTPS2	5.985	-0.004	0.00112788	0.168	5.873	-0.001	0.722675	0.019	6.11	-0.008	3.5881e-05	0.414	Male-specific	No	Yes
206489_s_at	DLGAP1	7.08	-0.008	8.59941e-05	0.229	7.097	-0.007	0.120606	0.169	7.103	-0.009	0.000379927	0.327	Male-specific	No	Yes
206534_at	GRIN2A	9.552	-0.013	2.49487e-05	0.257	9.487	-0.008	0.0885395	0.193	9.718	-0.019	5.18014e-05	0.399	Male-specific	No	Yes
206542_s_at	SMARCA2	9.543	-0.004	0.000922519	0.173	9.525	-0.002	0.215213	0.122	9.608	-0.006	0.000477989	0.318	Male-specific	No	Yes
206544_x_at	SMARCA2	9.423	-0.008	4.32923e-05	0.244	9.421	-0.006	0.0731438	0.208	9.482	-0.01	0.000295148	0.336	Male-specific	No	Yes
206667_s_at	SCAMP1	7.891	-0.016	9.03577e-05	0.227	7.769	-0.012	0.222297	0.119	8.068	-0.022	8.24879e-05	0.383	Male-specific	No	Yes
206849_at	GABRG2	10.292	-0.017	3.93347e-05	0.246	10.133	-0.01	0.177972	0.137	10.528	-0.024	5.05604e-05	0.4	Male-specific	No	Yes
207035_at	SLC30A3	8.408	-0.006	0.000703306	0.18	8.366	-0.003	0.2485	0.11	8.521	-0.01	0.000293479	0.336	Male-specific	No	Yes
207044_at	THRB	6.116	-0.006	0.000586959	0.184	6.167	-0.004	0.1347	0.16	6.147	-0.008	0.000687211	0.304	Male-specific	No	Yes
207049_at	SCN8A	7.348	-0.009	0.000329887	0.197	7.254	-0.004	0.373283	0.075	7.501	-0.013	5.88465e-05	0.395	Male-specific	No	Yes
207050_at	CACNA2D1	7.078	-0.01	1.44363e-05	0.269	7.007	-0.008	0.106687	0.178	7.168	-0.012	9.14461e-05	0.379	Male-specific	No	Yes
207141_s_at	KCNJ3	7.296	-0.013	5.75643e-05	0.238	7.24	-0.009	0.0849222	0.196	7.423	-0.017	0.000424558	0.323	Male-specific	No	Yes
207186_s_at	BPTF	7.587	0.008	0.000193628	0.21	7.61	0.006	0.13889	0.157	7.509	0.011	0.000618344	0.308	Male-specific	No	Yes
207268_x_at	ABI2	8.23	-0.007	2.14097e-05	0.26	8.233	-0.005	0.0601047	0.223	8.266	-0.008	0.000271069	0.339	Male-specific	No	Yes
207400_at	NPY5R	6.243	-0.006	3.68107e-05	0.248	6.117	-0.003	0.319707	0.088	6.369	-0.009	2.00328e-05	0.436	Male-specific	No	Yes
207483_s_at	CAND1	8.672	-0.007	1.62704e-05	0.267	8.674	-0.007	0.0564319	0.228	8.689	-0.008	0.00051414	0.315	Male-specific	No	Yes
207501_s_at	FGF12	8.579	-0.012	1.08289e-05	0.276	8.537	-0.009	0.0717889	0.21	8.668	-0.015	0.000115929	0.37	Male-specific	No	Yes
207507_s_at	ATP5MC3	11.184	-0.006	3.96766e-05	0.246	11.152	-0.004	0.129705	0.163	11.256	-0.009	8.13177e-05	0.383	Male-specific	No	Yes
207557_s_at	RYR2	7.136	0.008	8.57895e-05	0.229	7.155	0.006	0.105026	0.18	7.071	0.01	0.000536503	0.314	Male-specific	No	Yes
207594_s_at	SYNJ1	8.3	-0.018	1.25639e-05	0.272	8.141	-0.013	0.128035	0.164	8.512	-0.024	4.10632e-05	0.41	Male-specific	No	Yes
207648_at	DRP2	7.269	-0.007	0.000290336	0.2	7.272	-0.004	0.194408	0.13	7.338	-0.009	0.00016373	0.357	Male-specific	No	Yes
207671_s_at	BEST1	6.354	0.006	3.86905e-06	0.297	6.424	0.003	0.0642151	0.218	6.253	0.009	1.16055e-05	0.454	Male-specific	No	Yes
207704_s_at	GAS7	8.259	-0.011	0.000185022	0.211	8.288	-0.009	0.122449	0.168	8.316	-0.014	0.00074505	0.301	Male-specific	No	Yes
207732_s_at	DLG3	6.963	-0.008	2.83723e-05	0.254	6.993	-0.006	0.080036	0.201	6.996	-0.009	0.000116599	0.37	Male-specific	No	Yes
207772_s_at	PRMT8	8.463	-0.01	0.000220351	0.207	8.426	-0.007	0.239315	0.113	8.573	-0.014	0.000126887	0.366	Male-specific	No	Yes
207842_s_at	CASC3	8.382	0.006	5.67492e-06	0.289	8.422	0.004	0.0815689	0.199	8.303	0.009	1.1228e-05	0.456	Male-specific	No	Yes
207956_x_at	PDS5B	8.654	-0.005	0.000552716	0.185	8.531	-0.002	0.501673	0.049	8.769	-0.008	0.00015553	0.359	Male-specific	No	Yes
207957_s_at	PRKCB	12.383	-0.011	9.23114e-06	0.279	12.36	-0.008	0.0506017	0.236	12.465	-0.014	0.000124382	0.367	Male-specific	No	Yes
207968_s_at	MEF2C	9.1	-0.014	1.16698e-05	0.274	8.868	-0.008	0.190911	0.132	9.372	-0.022	1.16791e-05	0.454	Male-specific	No	Yes
207974_s_at	SKP1	11.839	-0.007	1.12696e-05	0.275	11.78	-0.005	0.0558596	0.229	11.93	-0.01	9.34154e-05	0.378	Male-specific	No	Yes
207980_s_at	CITED2	7.49	-0.015	6.05043e-05	0.237	7.35	-0.009	0.265386	0.104	7.704	-0.021	1.7346e-05	0.441	Male-specific	No	Yes
208035_at	GRM6	4.83	-0.002	0.306724	0.025	4.705	0.003	0.302587	0.093	5.003	-0.007	0.000656832	0.306	Male-specific	No	Yes
208132_x_at	PRRC2A	7.846	0.004	0.000597936	0.184	7.868	0.003	0.297551	0.095	7.784	0.007	0.000239432	0.344	Male-specific	No	Yes
208316_s_at	OCRL	7.791	-0.006	0.000206188	0.208	7.701	-0.003	0.349736	0.081	7.902	-0.009	8.56714e-05	0.381	Male-specific	No	Yes
208616_s_at	PTP4A2	10.243	0.005	0.00370357	0.14	10.337	0.001	0.699859	0.021	10.11	0.009	0.000271069	0.339	Male-specific	No	Yes
208683_at	CAPN2	8.896	0.009	3.35511e-05	0.25	8.872	0.008	0.0696864	0.212	8.848	0.012	0.000238258	0.344	Male-specific	No	Yes
208702_x_at	APLP2	9.905	-0.006	9.90224e-05	0.225	9.836	-0.004	0.19947	0.128	9.995	-0.009	0.000193015	0.352	Male-specific	No	Yes
208734_x_at	RAB2A	9.774	-0.006	0.000158138	0.215	9.748	-0.004	0.165546	0.143	9.841	-0.008	0.000277329	0.338	Male-specific	No	Yes
208761_s_at	SUMO1	10.204	-0.006	1.63234e-06	0.315	10.172	-0.004	0.0507543	0.235	10.275	-0.009	7.83585e-06	0.469	Male-specific	No	Yes
208785_s_at	MAP1LC3B	9.874	-0.005	0.000484111	0.188	9.794	-0.003	0.373655	0.075	9.96	-0.007	0.000356062	0.329	Male-specific	No	Yes
208800_at	SRP72	7.819	-0.008	0.000155973	0.215	7.717	-0.005	0.32688	0.086	7.952	-0.012	4.5359e-05	0.405	Male-specific	No	Yes
208813_at	GOT1	11.277	-0.009	5.49676e-05	0.239	11.292	-0.007	0.088889	0.193	11.322	-0.011	0.000361418	0.329	Male-specific	No	Yes
208840_s_at	G3BP2	9.211	-0.017	1.34203e-05	0.271	9.157	-0.013	0.106009	0.179	9.333	-0.021	4.8072e-05	0.402	Male-specific	No	Yes
208841_s_at	G3BP2	10.921	-0.007	0.000170234	0.213	10.853	-0.004	0.292226	0.096	11.038	-0.01	4.88492e-05	0.402	Male-specific	No	Yes
208868_s_at	GABARAPL1	9.918	-0.01	0.000233059	0.206	9.821	-0.005	0.278753	0.1	10.08	-0.015	0.000118371	0.37	Male-specific	No	Yes
208911_s_at	PDHB	8.675	-0.006	7.09677e-06	0.285	8.63	-0.004	0.144792	0.154	8.747	-0.009	6.37841e-06	0.475	Male-specific	No	Yes
208946_s_at	BECN1	9.031	-0.007	8.39762e-05	0.229	8.956	-0.004	0.158438	0.147	9.125	-0.01	0.000323216	0.332	Male-specific	No	Yes
208968_s_at	CIAPIN1	9.006	-0.005	0.00012762	0.219	8.99	-0.004	0.119973	0.169	9.047	-0.006	0.000702003	0.303	Male-specific	No	Yes
209055_s_at	CDC5L	8.005	-0.006	0.000339034	0.197	7.924	-0.004	0.301968	0.093	8.095	-0.008	0.000448689	0.321	Male-specific	No	Yes
209095_at	DLD	9.731	-0.006	3.75452e-05	0.247	9.666	-0.004	0.186758	0.134	9.821	-0.009	4.62083e-05	0.404	Male-specific	No	Yes
209096_at	UBE2V2	9.746	-0.008	1.68304e-05	0.266	9.728	-0.006	0.0858791	0.195	9.827	-0.011	4.43201e-05	0.407	Male-specific	No	Yes
209123_at	QDPR	11.182	0.008	0.000135662	0.218	11.268	0.004	0.291062	0.097	11.056	0.011	5.70463e-05	0.396	Male-specific	No	Yes
209199_s_at	MEF2C	11.674	-0.01	1.43769e-05	0.269	11.615	-0.007	0.0807729	0.2	11.775	-0.013	0.000112287	0.372	Male-specific	No	Yes
209283_at	CRYAB	10.111	0.014	8.46979e-05	0.229	10.227	0.008	0.202015	0.127	9.9	0.021	6.15278e-05	0.393	Male-specific	No	Yes
209300_s_at	NECAP1	10.112	-0.007	3.10947e-05	0.252	10.136	-0.005	0.0601369	0.223	10.152	-0.009	0.000132878	0.365	Male-specific	No	Yes
209303_at	NDUFS4	9.234	-0.006	7.20664e-05	0.232	9.136	-0.003	0.242383	0.112	9.347	-0.009	8.72424e-05	0.381	Male-specific	No	Yes
209357_at	CITED2	8.881	-0.01	0.00109294	0.169	8.76	-0.005	0.341177	0.083	9.082	-0.017	0.000626757	0.308	Male-specific	No	Yes
209361_s_at	PCBP4	7.956	0.005	6.57372e-05	0.235	7.982	0.004	0.107123	0.178	7.899	0.007	0.000291208	0.337	Male-specific	No	Yes
209377_s_at	HMGN3	9.546	0.006	0.000259043	0.203	9.496	0.005	0.163853	0.144	9.529	0.008	0.000216718	0.348	Male-specific	No	Yes
209456_s_at	FBXW11	7.723	-0.01	5.30548e-05	0.24	7.688	-0.007	0.101372	0.182	7.809	-0.013	0.000314885	0.333	Male-specific	No	Yes
209504_s_at	PLEKHB1	10.001	0.012	7.33823e-06	0.284	10.042	0.009	0.0751478	0.206	9.884	0.017	3.07832e-05	0.421	Male-specific	No	Yes
209539_at	ARHGEF6	7.459	0.007	9.69309e-05	0.226	7.455	0.005	0.163442	0.145	7.402	0.009	8.11294e-05	0.383	Male-specific	No	Yes
209569_x_at	NSG1	9.03	-0.01	0.000945489	0.173	8.916	-0.005	0.415221	0.066	9.205	-0.015	0.000284892	0.337	Male-specific	No	Yes
209747_at	TGFB3	6.35	0.006	1.87181e-05	0.263	6.417	0.004	0.0729391	0.208	6.27	0.008	0.00017877	0.354	Male-specific	No	Yes
209791_at	PADI2	8.861	0.009	4.50629e-05	0.243	8.899	0.006	0.143816	0.155	8.768	0.012	8.13177e-05	0.383	Male-specific	No	Yes
209856_x_at	ABI2	7.642	-0.007	3.41853e-05	0.25	7.631	-0.005	0.073812	0.207	7.692	-0.009	0.000322985	0.332	Male-specific	No	Yes
209915_s_at	NRXN1	9.886	-0.01	3.8451e-05	0.247	9.732	-0.005	0.161646	0.146	10.084	-0.016	5.05604e-05	0.401	Male-specific	No	Yes
209988_s_at	ASCL1	7.267	0.012	0.000487769	0.188	7.389	0.007	0.265459	0.104	7.087	0.018	0.000656832	0.306	Male-specific	No	Yes
210201_x_at	BIN1	9.275	0.006	0.000530209	0.186	9.3	0.004	0.218006	0.121	9.197	0.009	0.000516829	0.315	Male-specific	No	Yes
210232_at	CDC42	9.55	-0.009	0.000987684	0.172	9.372	-0.003	0.538967	0.043	9.771	-0.015	0.000168395	0.357	Male-specific	No	Yes
210250_x_at	ADSL	7.445	-0.005	2.41653e-05	0.258	7.406	-0.004	0.0944625	0.188	7.503	-0.007	0.000173854	0.355	Male-specific	No	Yes
210270_at	RGS6	7.494	-0.006	0.00046324	0.189	7.521	-0.004	0.125429	0.166	7.542	-0.008	0.000503069	0.316	Male-specific	No	Yes
210312_s_at	IFT20	7.824	0.005	0.00112265	0.169	7.827	0.003	0.403565	0.069	7.755	0.008	5.05604e-05	0.4	Male-specific	No	Yes
210315_at	SYN2	9.268	-0.019	1.20676e-06	0.322	9.292	-0.015	0.0553452	0.229	9.373	-0.024	4.8557e-06	0.493	Male-specific	No	Yes
210518_at	CDH8	7.314	-0.008	1.22364e-05	0.273	7.278	-0.007	0.124168	0.166	7.378	-0.01	2.72281e-05	0.425	Male-specific	No	Yes
210570_x_at	MAPK9	9.01	-0.01	4.53367e-06	0.294	8.944	-0.007	0.0846313	0.196	9.14	-0.015	9.5378e-06	0.462	Male-specific	No	Yes
210573_s_at	POLR3C	6.34	-0.004	0.00152289	0.161	6.284	-0.002	0.473797	0.054	6.426	-0.007	0.000332912	0.332	Male-specific	No	Yes
210621_s_at	RASA1	8.966	-0.007	3.78737e-05	0.247	8.914	-0.005	0.147512	0.153	9.032	-0.009	0.00013369	0.364	Male-specific	No	Yes
210657_s_at	SEPTIN4	9.217	0.012	3.17217e-05	0.251	9.224	0.009	0.0779397	0.203	9.111	0.017	0.000116524	0.37	Male-specific	No	Yes
210835_s_at	CTBP2	7.957	0.007	0.000191269	0.21	8.008	0.005	0.18195	0.136	7.876	0.009	0.00054743	0.313	Male-specific	No	Yes
210988_s_at	PRUNE1	6.455	-0.004	0.000444709	0.19	6.402	-0.002	0.457071	0.058	6.532	-0.007	2.76799e-05	0.424	Male-specific	No	Yes
211031_s_at	CLIP2	8.17	0.004	0.0231586	0.094	8.31	0	0.975938	0	8.015	0.008	0.000760803	0.3	Male-specific	No	Yes
211114_x_at	GEMIN2	6.459	-0.005	0.00134451	0.164	6.396	-0.002	0.485908	0.052	6.561	-0.008	0.000220784	0.347	Male-specific	No	Yes
211115_x_at	GEMIN2	7.022	-0.006	7.03214e-05	0.233	6.983	-0.004	0.153514	0.15	7.095	-0.008	0.000141213	0.362	Male-specific	No	Yes
211203_s_at	CNTN1	9.271	-0.013	4.90557e-06	0.293	9.099	-0.008	0.0705561	0.211	9.451	-0.017	7.04384e-05	0.388	Male-specific	No	Yes
211337_s_at	TUBGCP4	7.937	-0.009	1.61077e-05	0.267	7.901	-0.007	0.0664964	0.215	8.04	-0.013	6.76168e-05	0.39	Male-specific	No	Yes
211404_s_at	APLP2	8.831	-0.007	2.11363e-05	0.26	8.764	-0.004	0.13364	0.161	8.927	-0.01	5.05604e-05	0.4	Male-specific	No	Yes
211538_s_at	HSPA2	8.723	0.015	0.00021163	0.208	8.731	0.011	0.129743	0.163	8.591	0.021	0.000636765	0.307	Male-specific	No	Yes
211546_x_at	SNCA	9.522	-0.009	4.7413e-05	0.242	9.514	-0.007	0.062374	0.22	9.59	-0.012	0.000530248	0.314	Male-specific	No	Yes
211547_s_at	PAFAH1B1	8.979	-0.014	1.27327e-05	0.272	8.889	-0.01	0.134595	0.16	9.134	-0.019	2.13366e-05	0.434	Male-specific	No	Yes
211559_s_at	CCNG2	7.823	-0.01	1.10588e-05	0.275	7.55	-0.004	0.303172	0.093	8.063	-0.015	1.18944e-05	0.454	Male-specific	No	Yes
211561_x_at	MAPK14	6.337	-0.007	0.000158285	0.215	6.166	-0.003	0.459384	0.057	6.493	-0.01	4.05114e-05	0.41	Male-specific	No	Yes
211565_at	SH3GL3	5.576	-0.004	0.0112235	0.113	5.484	-0.001	0.795509	0.011	5.689	-0.007	0.000620366	0.308	Male-specific	No	Yes
211571_s_at	VCAN	5.494	0.01	0.00019781	0.209	5.552	0.006	0.236222	0.114	5.361	0.014	0.000118606	0.369	Male-specific	No	Yes
211575_s_at	UBE3A	7.126	-0.005	0.000452038	0.19	7.043	-0.003	0.477326	0.054	7.222	-0.007	4.21134e-05	0.409	Male-specific	No	Yes
211586_s_at	ATP2B2	7.485	-0.015	3.06351e-06	0.302	7.5	-0.013	0.0592773	0.224	7.549	-0.018	2.4614e-05	0.43	Male-specific	No	Yes
211702_s_at	USP32	6.615	-0.004	0.0046996	0.134	6.552	-0.002	0.602284	0.034	6.7	-0.007	0.000641665	0.307	Male-specific	No	Yes
211793_s_at	ABI2	8.565	-0.009	1.3195e-05	0.271	8.535	-0.006	0.0851935	0.196	8.652	-0.012	4.50823e-05	0.406	Male-specific	No	Yes
211871_x_at	GNB5	8.03	-0.01	3.56991e-05	0.249	7.967	-0.008	0.110636	0.175	8.123	-0.013	0.000251683	0.342	Male-specific	No	Yes
211971_s_at	LRPPRC	9.43	-0.004	0.00163168	0.16	9.381	-0.002	0.41748	0.065	9.506	-0.007	0.000729478	0.302	Male-specific	No	Yes
211992_at	WNK1	8.876	0.008	2.41785e-05	0.258	8.929	0.005	0.0908992	0.191	8.792	0.01	0.000168371	0.357	Male-specific	No	Yes
211994_at	WNK1	9.622	0.006	0.000304037	0.199	9.612	0.004	0.171365	0.141	9.565	0.008	0.00021775	0.347	Male-specific	No	Yes
212006_at	UBXN4	7.608	0.007	6.82402e-05	0.234	7.624	0.004	0.0689032	0.213	7.538	0.009	0.000271069	0.339	Male-specific	No	Yes
212015_x_at	PTBP1	6.841	0.006	0.000272469	0.202	6.838	0.004	0.118344	0.17	6.789	0.008	0.000644146	0.306	Male-specific	No	Yes
212194_s_at	TM9SF4	7.088	-0.007	0.000179403	0.212	7.01	-0.005	0.236899	0.114	7.18	-0.01	0.000317878	0.333	Male-specific	No	Yes
212216_at	PREPL	10.825	-0.016	1.08976e-05	0.275	10.717	-0.011	0.101557	0.182	11	-0.021	4.5359e-05	0.405	Male-specific	No	Yes
212217_at	PREPL	11.244	-0.008	0.000764228	0.178	11.168	-0.005	0.331325	0.085	11.368	-0.012	0.000503069	0.316	Male-specific	No	Yes
212373_at	FEM1B	7.526	-0.01	6.3287e-05	0.236	7.357	-0.006	0.288668	0.097	7.695	-0.014	4.43201e-05	0.407	Male-specific	No	Yes
212374_at	FEM1B	5.991	-0.009	3.14914e-05	0.251	5.915	-0.007	0.12288	0.167	6.076	-0.011	0.000231922	0.345	Male-specific	No	Yes
212397_at	RDX	7.81	0.011	0.000182769	0.211	7.842	0.008	0.131616	0.162	7.701	0.015	0.000644873	0.306	Male-specific	No	Yes
212508_at	MOAP1	12.002	-0.006	0.000320105	0.198	11.973	-0.004	0.236474	0.114	12.074	-0.008	0.000301704	0.335	Male-specific	No	Yes
212520_s_at	SMARCA4	7.775	0.008	2.93847e-05	0.253	7.816	0.006	0.178821	0.137	7.687	0.011	1.7346e-05	0.441	Male-specific	No	Yes
212522_at	PDE8A	6.672	0.012	2.93847e-05	0.253	6.685	0.009	0.0575182	0.227	6.573	0.016	0.000267116	0.34	Male-specific	No	Yes
212561_at	DENND5A	9.435	0.005	9.57682e-05	0.226	9.469	0.003	0.0756464	0.205	9.361	0.008	0.000279086	0.338	Male-specific	No	Yes
212566_at	MAP4	9.526	0.007	4.94397e-05	0.241	9.58	0.005	0.203797	0.126	9.421	0.011	2.48786e-05	0.429	Male-specific	No	Yes
212568_s_at	DLAT	8.584	-0.008	1.548e-05	0.268	8.569	-0.007	0.0659735	0.216	8.646	-0.011	0.00014933	0.361	Male-specific	No	Yes
212600_s_at	UQCRC2	10.701	-0.004	0.000199667	0.209	10.64	-0.002	0.267229	0.104	10.773	-0.006	0.000244394	0.343	Male-specific	No	Yes
212607_at	AKT3	9.996	-0.006	4.37436e-05	0.244	9.963	-0.004	0.127656	0.164	10.07	-0.008	6.38592e-05	0.392	Male-specific	No	Yes
212728_at	DLG3	8.305	-0.007	3.57627e-05	0.248	8.337	-0.005	0.0598845	0.223	8.346	-0.009	0.000124973	0.367	Male-specific	No	Yes
212751_at	UBE2N	10.108	-0.005	8.96029e-05	0.228	10.107	-0.003	0.0579195	0.226	10.151	-0.006	0.000455994	0.32	Male-specific	No	Yes
212752_at	CLASP1	8.67	0.004	0.000331722	0.197	8.657	0.004	0.170751	0.141	8.645	0.006	0.000610078	0.309	Male-specific	No	Yes
212763_at	CAMSAP2	7.669	-0.007	0.000304582	0.199	7.612	-0.005	0.239739	0.113	7.765	-0.01	0.000401416	0.325	Male-specific	No	Yes
212773_s_at	TOMM20	9.677	-0.01	0.000105183	0.224	9.638	-0.007	0.13539	0.16	9.752	-0.012	0.000585877	0.31	Male-specific	No	Yes
212778_at	PACS2	6.896	0.005	0.00240251	0.151	7.032	0.001	0.738095	0.017	6.743	0.009	0.000301417	0.335	Male-specific	No	Yes
212793_at	DAAM2	8.241	0.011	1.04052e-05	0.276	8.34	0.007	0.069504	0.212	8.102	0.015	8.59375e-05	0.381	Male-specific	No	Yes
212833_at	SLC25A46	8.624	-0.009	9.70432e-07	0.327	8.532	-0.006	0.0668556	0.215	8.724	-0.011	1.33664e-05	0.45	Male-specific	No	Yes
212835_at	ABRAXAS2	6.983	-0.005	0.000164435	0.214	6.909	-0.004	0.261023	0.106	7.057	-0.007	0.000263775	0.34	Male-specific	No	Yes
212877_at	KLC1	10.936	-0.008	3.70836e-05	0.248	10.949	-0.006	0.093542	0.189	10.995	-0.011	7.93478e-05	0.384	Male-specific	No	Yes
212878_s_at	KLC1	11.738	-0.008	2.15747e-05	0.26	11.767	-0.007	0.0658913	0.216	11.772	-0.01	0.000141213	0.362	Male-specific	No	Yes
212886_at	CCDC69	4.888	0.005	0.000762494	0.178	4.916	0.003	0.303767	0.093	4.81	0.008	0.000363877	0.328	Male-specific	No	Yes
212887_at	SEC23A	9.654	-0.008	0.000119639	0.221	9.589	-0.005	0.19534	0.13	9.765	-0.011	0.000151111	0.36	Male-specific	No	Yes
212956_at	TBC1D9	10.072	-0.005	3.25603e-05	0.251	10.077	-0.004	0.0531508	0.232	10.106	-0.007	0.00034737	0.33	Male-specific	No	Yes
213005_s_at	KANK1	7.623	0.012	2.35031e-05	0.258	7.672	0.008	0.0832755	0.198	7.508	0.016	0.000127486	0.366	Male-specific	No	Yes
213118_at	UHRF1BP1L	8.453	-0.005	7.58975e-05	0.231	8.387	-0.004	0.19286	0.131	8.524	-0.007	0.000231468	0.345	Male-specific	No	Yes
213227_at	PGRMC2	9.022	-0.004	0.000230889	0.206	8.959	-0.002	0.188527	0.133	9.093	-0.006	0.00076401	0.3	Male-specific	No	Yes
213236_at	SASH1	8.081	0.009	0.000137231	0.218	8.13	0.006	0.103703	0.181	7.98	0.012	0.000729921	0.302	Male-specific	No	Yes
213291_s_at	UBE3A	8.273	-0.005	0.00120863	0.167	8.2	-0.002	0.553403	0.041	8.377	-0.008	0.000101158	0.375	Male-specific	No	Yes
213388_at	PDE4DIP	7.575	0.009	0.000279853	0.201	7.489	0.008	0.13192	0.162	7.56	0.011	0.000516063	0.315	Male-specific	No	Yes
213390_at	ZC3H4	8.077	0.004	0.000834169	0.176	8.101	0.003	0.297658	0.095	8.018	0.007	0.00059328	0.31	Male-specific	No	Yes
213588_x_at	RPL14	11.375	0.006	4.35781e-05	0.244	11.323	0.005	0.0618979	0.221	11.367	0.007	0.000226984	0.346	Male-specific	No	Yes
213675_at	PARVA	6.17	0.006	7.53946e-06	0.283	6.261	0.004	0.109863	0.176	6.099	0.007	9.11765e-05	0.379	Male-specific	No	Yes
213745_at	ATRNL1	9.298	-0.012	1.11118e-05	0.275	9.186	-0.007	0.0933472	0.189	9.479	-0.018	2.49352e-05	0.429	Male-specific	No	Yes
213763_at	HIPK2	6.642	0.006	6.00899e-05	0.237	6.686	0.005	0.0741225	0.207	6.575	0.008	0.000727633	0.302	Male-specific	No	Yes
213825_at	OLIG2	7.569	0.009	0.000553797	0.185	7.637	0.005	0.2485	0.11	7.425	0.014	0.000455994	0.32	Male-specific	No	Yes
213841_at	TNR	10.568	0.007	0.000278796	0.201	10.663	0.004	0.276702	0.101	10.45	0.01	0.000340344	0.331	Male-specific	No	Yes
214087_s_at	MYBPC1	6.924	0.012	0.000410452	0.192	6.926	0.009	0.253897	0.108	6.827	0.017	0.000204623	0.35	Male-specific	No	Yes
214230_at	CDC42	9.452	-0.005	0.00216087	0.153	9.345	-0.002	0.578724	0.037	9.59	-0.009	0.00046853	0.319	Male-specific	No	Yes
214312_at	FOXA2	5.085	0.003	0.0161253	0.103	5.126	0.001	0.806483	0.01	5.004	0.006	0.000714054	0.303	Male-specific	No	Yes
214318_s_at	FRY	6.761	-0.009	1.72496e-05	0.265	6.789	-0.009	0.0572964	0.227	6.76	-0.01	0.000465904	0.319	Male-specific	No	Yes
214439_x_at	BIN1	9.189	0.006	0.000930808	0.173	9.245	0.003	0.35876	0.078	9.085	0.009	0.000383592	0.327	Male-specific	No	Yes
214581_x_at	TNFRSF21	7.418	-0.01	7.41032e-05	0.232	7.339	-0.007	0.176663	0.138	7.51	-0.012	0.000220784	0.347	Male-specific	No	Yes
214589_at	FGF12	8.528	-0.011	0.000159489	0.214	8.485	-0.008	0.185943	0.134	8.623	-0.014	0.00031942	0.333	Male-specific	No	Yes
214638_s_at	CCNT2	5.163	-0.004	0.00381796	0.139	5.065	-0.001	0.737048	0.017	5.262	-0.006	0.000122878	0.368	Male-specific	No	Yes
214666_x_at	IREB2	5.907	-0.007	0.000230889	0.206	5.799	-0.005	0.262962	0.105	6.007	-0.01	0.000479946	0.318	Male-specific	No	Yes
214761_at	ZNF423	6.726	0.008	0.000113771	0.222	6.745	0.006	0.120466	0.169	6.659	0.01	0.000489693	0.317	Male-specific	No	Yes
214797_s_at	CDK18	7.067	0.006	0.00117097	0.168	7.136	0.003	0.446772	0.06	6.963	0.009	0.000247069	0.342	Male-specific	No	Yes
214807_at	PLXDC2	4.997	0.006	0.00387074	0.139	5.135	0.002	0.655468	0.027	4.831	0.011	0.000681557	0.304	Male-specific	No	Yes
214875_x_at	APLP2	9.237	-0.006	8.79468e-05	0.228	9.179	-0.004	0.121533	0.168	9.316	-0.009	0.000504352	0.316	Male-specific	No	Yes
214952_at	NCAM1	6.306	0.008	8.43577e-05	0.229	6.39	0.005	0.173846	0.139	6.187	0.012	0.000180284	0.354	Male-specific	No	Yes
215020_at	NRXN3	8.562	-0.013	0.000216897	0.207	8.593	-0.01	0.13462	0.16	8.646	-0.017	0.000539765	0.313	Male-specific	No	Yes
215303_at	DCLK1	10.069	-0.011	0.00068052	0.18	9.94	-0.005	0.439737	0.061	10.284	-0.018	8.74324e-05	0.38	Male-specific	No	Yes
215307_at	ZNF529	7.294	-0.006	2.10509e-05	0.261	7.271	-0.005	0.0659788	0.216	7.333	-0.007	0.00046853	0.319	Male-specific	No	Yes
215687_x_at	PLCB1	8.009	-0.011	1.94179e-05	0.263	7.936	-0.007	0.0511241	0.235	8.14	-0.015	0.000165508	0.357	Male-specific	No	Yes
215716_s_at	ATP2B1	10.08	-0.007	0.000243232	0.204	10.024	-0.004	0.0908931	0.191	10.193	-0.011	0.000619437	0.308	Male-specific	No	Yes
215736_at	KCNV1	6.662	-0.008	7.80359e-05	0.231	6.577	-0.005	0.215281	0.122	6.789	-0.012	7.62997e-05	0.385	Male-specific	No	Yes
216096_s_at	NRXN1	8.757	-0.012	6.05588e-05	0.236	8.516	-0.006	0.307577	0.092	9.022	-0.019	3.75123e-05	0.413	Male-specific	No	Yes
216120_s_at	ATP2B2	9.833	-0.015	2.4488e-06	0.307	9.823	-0.012	0.0565647	0.228	9.932	-0.019	1.73435e-05	0.441	Male-specific	No	Yes
216593_s_at	PIGC	6.416	-0.006	4.8156e-05	0.242	6.388	-0.004	0.0909885	0.191	6.477	-0.008	0.000247858	0.342	Male-specific	No	Yes
216701_at	C1orf68	5.071	0.003	0.0123759	0.11	5.152	0	0.891901	0.004	4.962	0.006	0.000598903	0.31	Male-specific	No	Yes
216843_x_at	PMS2P1	7.703	-0.004	0.000871516	0.175	7.692	-0.002	0.325139	0.087	7.761	-0.006	0.000166085	0.357	Male-specific	No	Yes
216959_x_at	NRCAM	8.379	-0.011	4.8692e-05	0.242	8.236	-0.007	0.143653	0.155	8.525	-0.015	0.000317878	0.333	Male-specific	No	Yes
217356_s_at	PGK1	10.764	-0.01	4.96972e-06	0.292	10.708	-0.007	0.116274	0.172	10.875	-0.014	5.85479e-06	0.479	Male-specific	No	Yes
217457_s_at	RAP1GDS1	9.058	-0.009	5.24577e-06	0.291	9.072	-0.008	0.074198	0.207	9.091	-0.011	2.45026e-05	0.43	Male-specific	No	Yes
217734_s_at	WDR6	7.409	0.005	0.000280018	0.201	7.453	0.003	0.206342	0.125	7.346	0.007	0.000686868	0.304	Male-specific	No	Yes
217741_s_at	ZFAND5	9.809	-0.008	0.000155073	0.215	9.727	-0.005	0.244077	0.111	9.927	-0.011	0.000151022	0.36	Male-specific	No	Yes
217762_s_at	RAB31	8.484	0.012	5.35296e-06	0.291	8.5	0.01	0.0583543	0.225	8.408	0.015	5.90251e-05	0.395	Male-specific	No	Yes
217763_s_at	RAB31	8.77	0.011	4.42923e-05	0.244	8.744	0.009	0.0671497	0.214	8.722	0.014	0.000504352	0.316	Male-specific	No	Yes
217764_s_at	RAB31	9.21	0.011	5.84882e-05	0.237	9.178	0.009	0.106097	0.179	9.164	0.013	0.000202866	0.35	Male-specific	No	Yes
217773_s_at	NDUFA4	12.605	-0.004	0.000395105	0.193	12.581	-0.003	0.225865	0.118	12.648	-0.005	0.000749813	0.301	Male-specific	No	Yes
217865_at	RNF130	7.966	0.009	4.69836e-05	0.242	8.064	0.006	0.123581	0.167	7.829	0.013	0.000163641	0.358	Male-specific	No	Yes
217877_s_at	GPBP1L1	7.974	0.004	7.10035e-05	0.233	7.961	0.003	0.064572	0.217	7.959	0.005	0.000760158	0.3	Male-specific	No	Yes
217887_s_at	EPS15	10.223	-0.005	0.00028167	0.201	10.08	-0.001	0.57603	0.038	10.372	-0.009	5.21696e-05	0.399	Male-specific	No	Yes
217915_s_at	RSL24D1	9.784	-0.008	3.12371e-06	0.302	9.768	-0.006	0.0521868	0.234	9.85	-0.011	2.55937e-05	0.428	Male-specific	No	Yes
218027_at	MRPL15	9.247	-0.004	0.000833575	0.176	9.188	-0.002	0.395663	0.07	9.32	-0.006	0.000499713	0.317	Male-specific	No	Yes
218119_at	TIMM23	8.194	-0.007	1.513e-05	0.268	8.143	-0.005	0.0727572	0.208	8.26	-0.008	0.000220784	0.347	Male-specific	No	Yes
218122_s_at	SENP2	7.497	-0.004	0.000619559	0.183	7.364	-0.001	0.643812	0.028	7.621	-0.007	0.000107375	0.373	Male-specific	No	Yes
218177_at	CHMP1B	7.542	-0.006	0.00029627	0.2	7.533	-0.004	0.165063	0.144	7.61	-0.008	0.000305555	0.334	Male-specific	No	Yes
218181_s_at	MAP4K4	8.46	0.009	0.000417643	0.192	8.493	0.005	0.250556	0.109	8.329	0.014	0.00012681	0.367	Male-specific	No	Yes
218193_s_at	GOLT1B	7.171	-0.008	1.69289e-06	0.314	7.09	-0.007	0.0508214	0.235	7.23	-0.009	8.97126e-05	0.379	Male-specific	No	Yes
218205_s_at	MKNK2	7.791	0.009	0.00095518	0.172	7.866	0.005	0.330477	0.085	7.633	0.014	0.000398902	0.325	Male-specific	No	Yes
218224_at	PNMA1	11.409	-0.006	9.87892e-06	0.277	11.416	-0.005	0.0598378	0.223	11.435	-0.007	0.000102368	0.375	Male-specific	No	Yes
218867_s_at	SPRING1	6.937	-0.006	0.000418882	0.192	6.875	-0.003	0.322252	0.088	7.039	-0.009	0.000195092	0.351	Male-specific	No	Yes
218890_x_at	MRPL35	7.673	-0.006	1.85929e-05	0.264	7.672	-0.005	0.0905766	0.191	7.703	-0.007	0.000103546	0.375	Male-specific	No	Yes
219186_at	ZBTB7A	8.003	0.005	0.00188482	0.156	8.133	0.001	0.716814	0.019	7.853	0.009	0.000128299	0.366	Male-specific	No	Yes
219229_at	SLCO3A1	5.631	0.008	6.86249e-05	0.234	5.679	0.004	0.0813287	0.199	5.502	0.013	6.13474e-05	0.394	Male-specific	No	Yes
219332_at	MICALL2	6.18	0.006	0.000302852	0.199	6.225	0.004	0.19651	0.129	6.101	0.008	0.00058997	0.31	Male-specific	No	Yes
219343_at	CDC37L1	7.818	-0.007	1.68304e-05	0.266	7.791	-0.005	0.106303	0.178	7.883	-0.009	4.88492e-05	0.402	Male-specific	No	Yes
219356_s_at	CHMP5	10.069	-0.004	0.000147807	0.216	10.03	-0.003	0.126226	0.165	10.13	-0.006	0.00063275	0.307	Male-specific	No	Yes
219421_at	TTC33	6.711	-0.006	0.00388779	0.139	6.56	-0.003	0.616005	0.032	6.838	-0.009	0.000538765	0.314	Male-specific	No	Yes
219443_at	TASP1	6.996	-0.005	0.000838596	0.176	6.916	-0.003	0.45262	0.059	7.092	-0.008	0.000189832	0.352	Male-specific	No	Yes
219534_x_at	CDKN1C	5.816	0.008	0.00580877	0.129	5.821	0.004	0.479169	0.053	5.683	0.014	0.000755847	0.3	Male-specific	No	Yes
219563_at	SYNE3	5.293	0.01	4.45741e-05	0.244	5.398	0.006	0.159911	0.147	5.129	0.015	5.05604e-05	0.401	Male-specific	No	Yes
219688_at	BBS7	6.68	-0.008	0.000877535	0.175	6.462	-0.004	0.521546	0.046	6.883	-0.013	0.000386699	0.326	Male-specific	No	Yes
219728_at	MYOT	4.401	0.01	4.41065e-05	0.244	4.365	0.008	0.0797767	0.201	4.333	0.014	0.000113893	0.371	Male-specific	No	Yes
219858_s_at	MFSD6	7.483	-0.013	0.000444709	0.19	7.327	-0.008	0.34732	0.081	7.682	-0.019	0.000238039	0.344	Male-specific	No	Yes
219931_s_at	KLHL12	7.263	-0.007	1.32845e-05	0.271	7.267	-0.006	0.0524583	0.233	7.292	-0.008	0.000276012	0.339	Male-specific	No	Yes
219960_s_at	UCHL5	8.328	-0.007	0.000722153	0.179	8.218	-0.003	0.369106	0.076	8.485	-0.011	0.000278222	0.338	Male-specific	No	Yes
220097_s_at	TMEM104	5.873	0.005	4.36883e-06	0.295	5.871	0.004	0.0719101	0.209	5.843	0.006	1.48277e-05	0.447	Male-specific	No	Yes
220282_at	RIC3	6.663	-0.007	1.90829e-05	0.263	6.527	-0.003	0.331201	0.085	6.819	-0.011	4.05601e-06	0.5	Male-specific	No	Yes
220408_x_at	SUPT20H	6.262	0.005	0.000296624	0.2	6.289	0.003	0.269052	0.103	6.187	0.007	7.47865e-05	0.386	Male-specific	No	Yes
220768_s_at	CSNK1G3	7.311	-0.006	0.000168623	0.213	7.298	-0.005	0.147153	0.153	7.353	-0.008	0.000761411	0.3	Male-specific	No	Yes
221207_s_at	NBEA	10.254	-0.009	2.19346e-05	0.26	10.267	-0.007	0.0749946	0.206	10.304	-0.011	0.000122951	0.368	Male-specific	No	Yes
221246_x_at	TNS1	6.614	0.007	2.70141e-06	0.305	6.678	0.005	0.0778551	0.203	6.526	0.01	1.7346e-05	0.44	Male-specific	No	Yes
221279_at	GDAP1	7.435	-0.012	0.000113264	0.222	7.401	-0.01	0.124911	0.166	7.517	-0.015	0.000743915	0.301	Male-specific	No	Yes
221310_at	FGF14	8.681	-0.012	7.74389e-06	0.283	8.589	-0.008	0.082538	0.198	8.832	-0.017	3.44756e-05	0.416	Male-specific	No	Yes
221452_s_at	TMEM14B	9.268	-0.007	0.00294855	0.146	9.123	-0.002	0.704086	0.021	9.447	-0.012	0.00014933	0.361	Male-specific	No	Yes
221465_at	OR6A2	5.252	-0.004	0.0200346	0.098	5.157	0	0.961237	0.001	5.391	-0.008	0.000437651	0.322	Male-specific	No	Yes
221518_s_at	USP47	8.19	0.006	7.90707e-05	0.23	8.272	0.003	0.230477	0.116	8.087	0.009	8.40956e-05	0.382	Male-specific	No	Yes
221531_at	WDR61	7.638	-0.007	0.00135775	0.164	7.585	-0.004	0.36873	0.076	7.734	-0.01	0.000692229	0.304	Male-specific	No	Yes
221588_x_at	ALDH6A1	8.664	0.009	0.000274744	0.202	8.66	0.007	0.190477	0.132	8.616	0.011	0.000458591	0.32	Male-specific	No	Yes
221731_x_at	VCAN	6.945	0.012	4.93661e-06	0.293	6.929	0.01	0.0564294	0.228	6.87	0.016	2.58834e-05	0.427	Male-specific	No	Yes
221748_s_at	TNS1	6.993	0.012	4.01061e-05	0.246	7.025	0.01	0.0657068	0.216	6.896	0.016	0.000514398	0.315	Male-specific	No	Yes
221868_at	PAIP2B	7.627	0.01	0.000636613	0.182	7.608	0.007	0.209594	0.124	7.54	0.014	0.00055241	0.313	Male-specific	No	Yes
222230_s_at	ACTR10	10.66	-0.005	5.89152e-05	0.237	10.639	-0.004	0.0798823	0.201	10.715	-0.007	0.000332912	0.332	Male-specific	No	Yes
222258_s_at	SH3BP4	6.189	0.011	2.91025e-05	0.253	6.193	0.008	0.0644251	0.217	6.093	0.015	0.000118837	0.369	Male-specific	No	Yes
222422_s_at	NDFIP1	9.049	-0.01	0.000747745	0.178	9.07	-0.007	0.265756	0.104	9.133	-0.014	0.000304008	0.335	Male-specific	No	Yes
222442_s_at	ARL8B	9.341	-0.011	1.38768e-06	0.319	9.302	-0.009	0.0627826	0.219	9.427	-0.014	9.5378e-06	0.462	Male-specific	No	Yes
222531_s_at	AP5M1	8.116	-0.004	0.0210147	0.097	7.968	0	0.967782	0	8.27	-0.007	0.000534452	0.314	Male-specific	No	Yes
222553_x_at	OXR1	10.935	-0.007	0.00033558	0.197	10.872	-0.004	0.252313	0.108	11.056	-0.011	0.000225181	0.346	Male-specific	No	Yes
222578_s_at	UBA5	7.947	-0.006	0.000321802	0.198	7.892	-0.004	0.244559	0.111	8.033	-0.009	0.000446565	0.321	Male-specific	No	Yes
222625_s_at	NDE1	4.854	0.004	0.00704368	0.124	4.904	0.001	0.739741	0.017	4.757	0.007	0.000312593	0.334	Male-specific	No	Yes
222660_s_at	RNF38	5.748	-0.006	0.000108561	0.223	5.705	-0.005	0.189816	0.132	5.795	-0.008	0.000231356	0.345	Male-specific	No	Yes
222697_s_at	ABHD10	7.937	-0.008	7.73e-05	0.231	7.929	-0.007	0.100817	0.183	7.986	-0.01	0.000632013	0.307	Male-specific	No	Yes
222703_s_at	YRDC	6.89	-0.006	6.31304e-05	0.236	6.943	-0.005	0.0530752	0.232	6.891	-0.007	0.000737797	0.301	Male-specific	No	Yes
222792_s_at	CCDC59	7.003	0.004	0.000640766	0.182	7.092	0.002	0.49288	0.051	6.913	0.006	0.000226984	0.346	Male-specific	No	Yes
222993_at	MRPL37	8.395	-0.007	1.58348e-05	0.267	8.393	-0.006	0.0679842	0.213	8.433	-0.009	0.000166418	0.357	Male-specific	No	Yes
223026_s_at	VPS29	9.828	-0.005	2.10732e-05	0.26	9.784	-0.003	0.0541455	0.231	9.883	-0.006	0.000454222	0.32	Male-specific	No	Yes
223027_at	SNX9	6.937	0.005	0.000181008	0.211	6.987	0.003	0.222233	0.119	6.877	0.006	0.0004069	0.324	Male-specific	No	Yes
223043_at	EMC4	10.089	-0.005	0.000108181	0.223	10.027	-0.003	0.234353	0.115	10.168	-0.007	0.000135545	0.364	Male-specific	No	Yes
223058_at	FAM107B	6.946	0.018	9.18026e-06	0.279	7.041	0.013	0.0628568	0.219	6.781	0.023	0.000108247	0.373	Male-specific	No	Yes
223059_s_at	FAM107B	6.789	0.018	9.44401e-06	0.278	6.827	0.015	0.0618979	0.221	6.658	0.023	0.000103711	0.374	Male-specific	No	Yes
223084_s_at	CCNDBP1	9.284	-0.007	3.62467e-05	0.248	9.246	-0.005	0.107709	0.177	9.352	-0.009	0.000204623	0.35	Male-specific	No	Yes
223341_s_at	SCOC	9.435	-0.013	5.72296e-05	0.238	9.334	-0.008	0.120466	0.169	9.609	-0.018	0.000147928	0.361	Male-specific	No	Yes
223443_s_at	AMZ2P1	8.52	-0.005	0.000721432	0.179	8.42	-0.003	0.447607	0.06	8.626	-0.008	0.000301998	0.335	Male-specific	No	Yes
223449_at	SEMA6A	6.869	0.007	2.74531e-05	0.255	6.903	0.005	0.0849818	0.196	6.805	0.009	0.000231468	0.345	Male-specific	No	Yes
223478_at	TIMM8B	7.381	-0.005	0.000519276	0.187	7.397	-0.004	0.21179	0.123	7.407	-0.006	0.000503682	0.316	Male-specific	No	Yes
223486_at	GTPBP8	5.824	-0.004	9.48227e-05	0.226	5.819	-0.003	0.145471	0.154	5.862	-0.006	0.000151667	0.36	Male-specific	No	Yes
224484_s_at	BRMS1L	6.326	-0.01	7.81565e-06	0.283	6.313	-0.009	0.0604574	0.222	6.355	-0.011	0.000179184	0.354	Male-specific	No	Yes
224530_s_at	KCNIP4	9.257	-0.012	5.86995e-05	0.237	9.137	-0.007	0.137314	0.158	9.436	-0.017	0.000136869	0.363	Male-specific	No	Yes
224616_at	DYNC1LI2	10.698	0.004	0.000116836	0.221	10.728	0.002	0.251057	0.109	10.622	0.007	1.62837e-05	0.444	Male-specific	No	Yes
224630_at	ERLEC1	9.897	-0.008	0.000155973	0.215	9.797	-0.004	0.241745	0.112	10.039	-0.012	0.000120207	0.369	Male-specific	No	Yes
224675_at	MESD	7.485	0.006	9.08674e-05	0.227	7.576	0.003	0.24224	0.112	7.388	0.008	0.000157462	0.359	Male-specific	No	Yes
224780_at	RBM17	7.65	0.006	2.88555e-05	0.253	7.658	0.004	0.0856426	0.195	7.585	0.008	4.21174e-05	0.409	Male-specific	No	Yes
224781_s_at	RBM17	8.147	0.005	0.000138584	0.217	8.185	0.003	0.218642	0.121	8.074	0.007	9.58977e-05	0.377	Male-specific	No	Yes
224790_at	ASAP1	7.934	-0.007	2.66954e-05	0.255	7.944	-0.005	0.0501998	0.236	7.964	-0.008	0.000479946	0.318	Male-specific	No	Yes
224801_at	NDFIP2	11.31	-0.007	2.40076e-05	0.258	11.228	-0.004	0.0791112	0.202	11.426	-0.01	7.93478e-05	0.384	Male-specific	No	Yes
224822_at	DLC1	7.578	0.007	4.44616e-05	0.244	7.6	0.005	0.0898413	0.192	7.503	0.01	0.000127843	0.366	Male-specific	No	Yes
224893_at	ATL3	7.18	0.008	0.000123127	0.22	7.135	0.007	0.11983	0.169	7.156	0.01	0.000315932	0.333	Male-specific	No	Yes
225088_at	CEP20	6.428	-0.007	9.08674e-05	0.227	6.368	-0.005	0.184745	0.134	6.507	-0.009	0.000232179	0.345	Male-specific	No	Yes
225092_at	RABEP1	9.813	-0.005	2.11746e-05	0.26	9.808	-0.004	0.0520021	0.234	9.852	-0.007	0.000245035	0.343	Male-specific	No	Yes
225097_at	HIPK2	8.642	0.013	5.34836e-06	0.291	8.722	0.008	0.0506816	0.236	8.485	0.018	3.24211e-05	0.419	Male-specific	No	Yes
225115_at	HIPK2	7.626	0.015	2.3215e-05	0.258	7.776	0.01	0.0601369	0.223	7.412	0.022	0.000193174	0.352	Male-specific	No	Yes
225144_at	BMPR2	10.257	-0.005	3.56991e-05	0.249	10.222	-0.004	0.197102	0.129	10.317	-0.007	2.47517e-05	0.429	Male-specific	No	Yes
225214_at	LOC100129034	6.749	0.005	0.00018421	0.211	6.833	0.003	0.227537	0.117	6.666	0.007	0.000600187	0.309	Male-specific	No	Yes
225359_at	DNAJC19	8.516	-0.005	1.16897e-05	0.274	8.468	-0.004	0.0553452	0.229	8.584	-0.007	0.000126887	0.366	Male-specific	No	Yes
225368_at	HIPK2	9.948	0.012	1.48647e-05	0.268	9.921	0.009	0.054007	0.231	9.878	0.015	8.85363e-05	0.38	Male-specific	No	Yes
225388_at	TSPAN5	9.384	-0.009	2.88731e-05	0.253	9.309	-0.005	0.140375	0.156	9.509	-0.013	4.57857e-05	0.405	Male-specific	No	Yes
225439_at	NUDCD1	7.098	-0.005	0.00012866	0.219	6.978	-0.003	0.225104	0.118	7.204	-0.007	0.000498601	0.317	Male-specific	No	Yes
225446_at	BRWD1	9.768	-0.009	4.31476e-05	0.244	9.657	-0.005	0.185842	0.134	9.913	-0.013	5.72511e-05	0.396	Male-specific	No	Yes
225537_at	TRAPPC6B	9.152	-0.009	3.10947e-05	0.252	9.073	-0.005	0.134225	0.16	9.28	-0.012	5.37786e-05	0.398	Male-specific	No	Yes
225576_at	GINM1	7.006	0.006	0.000111738	0.222	7.013	0.004	0.117522	0.171	6.959	0.008	0.000446565	0.321	Male-specific	No	Yes
225591_at	FBXO25	8.023	-0.004	0.00234866	0.151	7.974	-0.002	0.478331	0.054	8.1	-0.006	0.000743753	0.301	Male-specific	No	Yes
225655_at	UHRF1	4.36	0.006	0.00115416	0.168	4.385	0.003	0.300301	0.094	4.27	0.009	0.000456447	0.32	Male-specific	No	Yes
225749_at	C16orf91	7.802	-0.005	2.80795e-06	0.304	7.742	-0.003	0.0569181	0.227	7.871	-0.007	4.8072e-05	0.402	Male-specific	No	Yes
225757_s_at	CLMN	6.584	0.005	6.63188e-05	0.234	6.655	0.003	0.176282	0.138	6.492	0.008	0.000103711	0.374	Male-specific	No	Yes
225906_at	CASTOR2	8.969	0.005	0.000309606	0.199	8.94	0.004	0.160429	0.146	8.95	0.006	0.000439442	0.322	Male-specific	No	Yes
225918_at	GLG1	7.887	0.007	1.86249e-06	0.313	7.925	0.005	0.0729983	0.208	7.831	0.008	1.51588e-05	0.446	Male-specific	No	Yes
225928_at	VTI1B	7.207	-0.006	7.11531e-06	0.285	7.179	-0.004	0.069985	0.212	7.253	-0.007	8.74324e-05	0.38	Male-specific	No	Yes
225941_at	EIF4E3	8.589	-0.005	0.000216399	0.207	8.555	-0.003	0.16975	0.141	8.647	-0.007	0.000641665	0.307	Male-specific	No	Yes
226040_at	TRIM56	4.445	0.006	0.011909	0.111	4.485	0.002	0.68139	0.024	4.32	0.01	0.000681557	0.304	Male-specific	No	Yes
226052_at	BRD4	8.2	0.003	0.0120302	0.111	8.263	0	0.860847	0.006	8.113	0.005	0.000503069	0.316	Male-specific	No	Yes
226139_at	CCDC149	6.877	0.004	0.00182639	0.157	6.979	0.001	0.686943	0.023	6.78	0.006	0.000198552	0.351	Male-specific	No	Yes
226176_s_at	USP42	5.95	0.006	0.00180335	0.157	6.074	0.003	0.526152	0.045	5.797	0.011	0.000564968	0.312	Male-specific	No	Yes
226264_at	SUSD1	6.601	-0.005	0.00183219	0.157	6.522	-0.002	0.579277	0.037	6.71	-0.008	0.000178631	0.355	Male-specific	No	Yes
226267_at	JDP2	7.065	0.006	0.000131232	0.219	7.068	0.004	0.132025	0.162	7.012	0.008	0.000230096	0.345	Male-specific	No	Yes
226271_at	GDAP1	9.012	-0.007	0.00311968	0.144	8.885	-0.002	0.620509	0.032	9.183	-0.012	0.000498809	0.317	Male-specific	No	Yes
226342_at	SPTBN1	6.879	0.012	8.29445e-05	0.229	7.111	0.007	0.194692	0.13	6.67	0.017	0.00040671	0.324	Male-specific	No	Yes
226432_at	ETNK1	7.806	-0.008	0.00455447	0.135	7.496	-0.003	0.732334	0.018	8.052	-0.013	0.000753301	0.3	Male-specific	No	Yes
226507_at	PAK1	11.389	-0.008	2.96515e-05	0.253	11.346	-0.005	0.0529401	0.232	11.487	-0.011	0.00013249	0.365	Male-specific	No	Yes
226690_at	ADCYAP1R1	8.477	0.008	7.23517e-05	0.232	8.521	0.006	0.151489	0.151	8.401	0.01	0.000226984	0.346	Male-specific	No	Yes
226794_at	STXBP5	6.315	-0.009	1.7773e-05	0.265	6.294	-0.008	0.11815	0.17	6.366	-0.011	4.59735e-05	0.404	Male-specific	No	Yes
226899_at	UNC5B	6.559	0.006	0.000243271	0.204	6.621	0.003	0.236899	0.114	6.453	0.009	0.000168737	0.356	Male-specific	No	Yes
226972_s_at	CCDC136	8.89	-0.008	6.35557e-05	0.235	8.845	-0.006	0.184429	0.134	8.979	-0.011	7.11873e-05	0.388	Male-specific	No	Yes
226996_at	LCLAT1	7.391	-0.006	3.36945e-05	0.25	7.369	-0.004	0.0724979	0.209	7.431	-0.007	0.000554103	0.312	Male-specific	No	Yes
227064_at	ANKRD40	8.655	0.008	1.1971e-05	0.273	8.739	0.005	0.160737	0.146	8.519	0.013	6.27665e-06	0.476	Male-specific	No	Yes
227080_at	ZNF697	7.203	-0.007	0.00214145	0.153	7.212	-0.004	0.237734	0.114	7.304	-0.011	0.000669073	0.305	Male-specific	No	Yes
227084_at	DTNA	9.272	0.013	1.68304e-05	0.266	9.352	0.01	0.113637	0.173	9.147	0.017	7.00519e-05	0.389	Male-specific	No	Yes
227209_at	CNTN1	9.994	-0.007	0.000147318	0.216	9.878	-0.004	0.249044	0.11	10.124	-0.01	0.000237539	0.344	Male-specific	No	Yes
227308_x_at	LTBP3	7.15	0.005	3.70836e-05	0.248	7.218	0.003	0.075845	0.205	7.083	0.007	0.000644873	0.306	Male-specific	No	Yes
227318_at	TMEM178B	9.983	-0.009	5.37854e-05	0.239	10.029	-0.008	0.0864512	0.195	10.017	-0.011	0.000199644	0.351	Male-specific	No	Yes
227375_at	ANKRD13C	6.636	-0.007	0.000533849	0.186	6.465	-0.004	0.378723	0.074	6.778	-0.01	0.000749505	0.301	Male-specific	No	Yes
227382_at	CYB5B	7.122	-0.008	0.000735485	0.179	6.892	-0.003	0.716736	0.019	7.357	-0.014	5.23153e-06	0.486	Male-specific	No	Yes
227401_at	IL17D	8.501	0.008	4.33698e-05	0.244	8.56	0.006	0.148655	0.152	8.406	0.011	0.000106701	0.373	Male-specific	No	Yes
227444_at	ARMCX4	7.555	-0.007	0.000105018	0.224	7.564	-0.006	0.118521	0.17	7.595	-0.009	0.000437651	0.322	Male-specific	No	Yes
227449_at	EPHA4	10.788	-0.01	6.79912e-06	0.286	10.724	-0.007	0.058457	0.225	10.903	-0.013	4.59735e-05	0.404	Male-specific	No	Yes
227562_at	LAMTOR3	8.854	-0.007	1.23347e-05	0.273	8.787	-0.005	0.104806	0.18	8.925	-0.009	0.0001078	0.373	Male-specific	No	Yes
227611_at	TARS3	7.307	0.006	7.54509e-05	0.231	7.26	0.005	0.0738929	0.207	7.28	0.008	0.000122804	0.368	Male-specific	No	Yes
227870_at	IGDCC4	4.74	0.015	5.42437e-06	0.29	4.8	0.011	0.0714677	0.21	4.603	0.02	3.31932e-05	0.418	Male-specific	No	Yes
228146_at	LINC02693	7.481	-0.005	0.000247886	0.204	7.487	-0.004	0.130748	0.162	7.528	-0.007	0.000469272	0.319	Male-specific	No	Yes
228378_at	C12orf29	7.535	-0.009	1.76437e-05	0.265	7.381	-0.006	0.101125	0.183	7.691	-0.013	0.00014572	0.362	Male-specific	No	Yes
228457_at	PPM1L	7.381	-0.007	0.000181921	0.211	7.267	-0.005	0.29141	0.097	7.484	-0.01	0.000215504	0.348	Male-specific	No	Yes
228549_at	TMEM63A	5.204	0.005	0.0061334	0.128	5.212	0.002	0.515649	0.047	5.123	0.008	0.000585877	0.31	Male-specific	No	Yes
228824_s_at	PTGR1	7.815	-0.008	0.000184382	0.211	7.8	-0.006	0.168662	0.142	7.888	-0.011	0.000352133	0.329	Male-specific	No	Yes
228948_at	EPHA4	9.809	-0.015	1.19621e-05	0.273	9.758	-0.01	0.0721026	0.209	9.958	-0.02	4.94678e-05	0.401	Male-specific	No	Yes
228981_at	TMEM169	6.772	-0.006	3.57627e-05	0.248	6.734	-0.004	0.11422	0.173	6.845	-0.008	9.85803e-05	0.376	Male-specific	No	Yes
229083_at	HNRNPA0	7.803	-0.009	7.31209e-07	0.333	7.677	-0.005	0.152333	0.15	7.944	-0.012	8.93853e-07	0.562	Male-specific	No	Yes
229374_at	EPHA4	8.677	-0.014	1.376e-06	0.319	8.523	-0.009	0.0987896	0.184	8.878	-0.02	4.16629e-06	0.498	Male-specific	No	Yes
229506_at	PPM1L	7.701	-0.009	0.000159289	0.214	7.6	-0.006	0.296998	0.095	7.839	-0.013	7.41589e-05	0.387	Male-specific	No	Yes
229537_at	LMO4	9.612	-0.013	2.33196e-05	0.258	9.577	-0.01	0.100559	0.183	9.717	-0.017	0.000101158	0.375	Male-specific	No	Yes
229649_at	NRXN3	10.363	-0.006	3.25603e-05	0.251	10.416	-0.005	0.0556104	0.229	10.381	-0.008	0.000108344	0.373	Male-specific	No	Yes
229793_at	ASAH2B	7.292	-0.006	0.0011767	0.167	7.11	-0.001	0.78572	0.012	7.476	-0.01	4.62656e-05	0.404	Male-specific	No	Yes
229800_at	DCLK1	7.546	0.006	0.0219457	0.096	7.976	-0.002	0.531016	0.044	7.173	0.014	0.00053498	0.314	Male-specific	No	Yes
230045_at	CNTN2	7.53	0.01	0.000842506	0.175	7.697	0.005	0.416658	0.066	7.329	0.016	0.000437651	0.322	Male-specific	No	Yes
230359_at	KNDC1	8.371	0.005	8.07621e-05	0.23	8.378	0.004	0.138646	0.157	8.336	0.006	0.000215504	0.348	Male-specific	No	Yes
230962_at	DCLK1	8.703	-0.007	0.00306128	0.145	8.509	-0.002	0.785819	0.012	8.921	-0.013	0.000123373	0.368	Male-specific	No	Yes
230988_at	ADD2	6.791	-0.007	1.25639e-05	0.272	6.806	-0.006	0.0605744	0.222	6.817	-0.008	0.000133253	0.364	Male-specific	No	Yes
231358_at	MRO	7.794	0.012	0.000233501	0.205	7.713	0.01	0.137556	0.158	7.751	0.015	0.000346619	0.33	Male-specific	No	Yes
231791_at	ASAH2B	5.41	-0.005	0.00294326	0.146	5.237	-0.002	0.676069	0.025	5.558	-0.009	0.000650384	0.306	Male-specific	No	Yes
231861_at	LRP10	5.151	0.005	0.00108361	0.169	5.193	0.003	0.298875	0.094	5.065	0.008	0.000760158	0.3	Male-specific	No	Yes
232062_at	ADCY1	7.265	-0.009	9.03577e-05	0.227	7.205	-0.006	0.088889	0.193	7.369	-0.012	0.00062246	0.308	Male-specific	No	Yes
232343_at	DCTN5	6.077	-0.005	0.00041752	0.192	5.994	-0.003	0.318564	0.089	6.165	-0.007	0.000557391	0.312	Male-specific	No	Yes
232591_s_at	TMEM30A	8.292	-0.01	0.000540571	0.186	8.124	-0.006	0.332691	0.085	8.455	-0.014	0.000749813	0.301	Male-specific	No	Yes
232893_at	LMBRD2	4.894	-0.006	0.000177557	0.212	4.799	-0.004	0.287766	0.098	4.991	-0.009	0.000217382	0.347	Male-specific	No	Yes
233305_at	NECAB1	9.248	-0.017	9.67865e-05	0.226	9.069	-0.011	0.219665	0.12	9.479	-0.024	0.00014028	0.363	Male-specific	No	Yes
233499_at	LRRC7	8.116	-0.011	5.01785e-05	0.241	8.087	-0.009	0.0909771	0.191	8.183	-0.014	0.000620061	0.308	Male-specific	No	Yes
233558_s_at	TRAPPC11	7.501	-0.007	7.93503e-05	0.23	7.425	-0.004	0.223	0.119	7.586	-0.009	0.000121964	0.368	Male-specific	No	Yes
234982_at	UBR3	8.962	-0.006	7.43629e-06	0.284	8.894	-0.004	0.0744365	0.207	9.03	-0.008	0.000132299	0.365	Male-specific	No	Yes
235164_at	ZNF25	8.549	-0.004	0.0310748	0.087	8.28	0.001	0.722025	0.019	8.785	-0.009	0.00038738	0.326	Male-specific	No	Yes
235260_s_at	PACRGL	6.602	-0.006	0.000115118	0.222	6.499	-0.004	0.294715	0.096	6.698	-0.008	0.000103591	0.374	Male-specific	No	Yes
235502_at	PPP2CA	6.289	-0.011	8.20814e-06	0.282	6.26	-0.009	0.0797273	0.201	6.352	-0.013	6.86736e-05	0.389	Male-specific	No	Yes
235919_at	CEP78	6.094	0.009	0.000540742	0.186	6.167	0.005	0.246739	0.11	5.965	0.013	0.000661832	0.305	Male-specific	No	Yes
236718_at	MYO10	4.463	0.002	0.0434934	0.078	4.547	0	0.927073	0.002	4.361	0.005	0.000511556	0.315	Male-specific	No	Yes
237790_at	SCN8A	7.505	-0.008	0.000922334	0.173	7.445	-0.005	0.410903	0.067	7.619	-0.012	0.000128299	0.366	Male-specific	No	Yes
238003_at	HEPACAM	8.624	0.009	0.000551029	0.185	8.724	0.006	0.305755	0.092	8.5	0.012	0.000656832	0.306	Male-specific	No	Yes
238409_x_at	OXR1	6.23	-0.008	0.000196985	0.209	6.164	-0.006	0.211847	0.123	6.312	-0.01	0.000484968	0.318	Male-specific	No	Yes
238487_at	GNL1	7.568	-0.007	4.73917e-05	0.242	7.643	-0.007	0.0541086	0.231	7.56	-0.008	0.000631547	0.307	Male-specific	No	Yes
238521_at	FGF12	10.318	-0.011	0.000158766	0.214	10.248	-0.006	0.228485	0.117	10.467	-0.016	9.7441e-05	0.376	Male-specific	No	Yes
238584_at	IQCA1	5.036	0.011	2.52899e-05	0.257	5.024	0.01	0.0519441	0.234	4.981	0.014	0.0004608	0.32	Male-specific	No	Yes
238663_x_at	GRIA4	9.711	-0.012	4.04282e-05	0.246	9.717	-0.009	0.0576421	0.226	9.815	-0.017	0.000192022	0.352	Male-specific	No	Yes
238861_at	SSBP2	6.729	-0.006	5.45828e-05	0.239	6.714	-0.004	0.159964	0.146	6.791	-0.008	4.62083e-05	0.404	Male-specific	No	Yes
239144_at	B3GAT2	7.664	0.009	0.000716632	0.179	7.877	0.003	0.536504	0.044	7.437	0.014	0.000216718	0.348	Male-specific	No	Yes
239290_at	FRMPD4	9.288	-0.008	6.90565e-05	0.234	9.157	-0.004	0.150365	0.151	9.435	-0.012	0.000206707	0.349	Male-specific	No	Yes
240162_at	LINC01511	6.324	-0.006	0.000238051	0.205	6.378	-0.005	0.0817524	0.199	6.344	-0.008	0.000692229	0.304	Male-specific	No	Yes
241606_s_at	TRUB1	5.976	-0.006	0.000397191	0.193	5.812	-0.002	0.616979	0.032	6.128	-0.009	4.63201e-05	0.404	Male-specific	No	Yes
241922_at	LMO4	8.439	-0.012	2.55252e-05	0.256	8.306	-0.006	0.165191	0.144	8.639	-0.018	2.45026e-05	0.43	Male-specific	No	Yes
241946_at	ZDHHC21	6.526	-0.011	1.23671e-05	0.273	6.32	-0.006	0.240941	0.112	6.717	-0.015	1.12261e-05	0.456	Male-specific	No	Yes
242098_at	ARFGEF3	6.478	-0.011	1.92922e-05	0.263	6.497	-0.011	0.0671817	0.214	6.487	-0.012	0.000365209	0.328	Male-specific	No	Yes
242196_at	ARHGAP32	7.467	-0.007	0.00120378	0.167	7.222	-0.002	0.699755	0.021	7.679	-0.011	0.0002448	0.343	Male-specific	No	Yes
242571_at	REPS2	7.84	-0.013	0.000158697	0.214	7.686	-0.009	0.300723	0.094	7.997	-0.017	5.2578e-05	0.399	Male-specific	No	Yes
242592_at	GPR137C	7.11	-0.011	0.000311703	0.199	6.961	-0.007	0.308037	0.092	7.271	-0.015	0.000301704	0.335	Male-specific	No	Yes
242789_at	PDE1A	8.344	-0.013	7.1158e-05	0.233	8.265	-0.009	0.148372	0.152	8.487	-0.018	0.000207923	0.349	Male-specific	No	Yes
243244_at	CACNB4	7.862	-0.009	3.97133e-05	0.246	7.749	-0.005	0.156447	0.148	8.012	-0.013	8.11294e-05	0.383	Male-specific	No	Yes
243550_at	ZDHHC21	5.444	-0.007	8.88662e-05	0.228	5.354	-0.005	0.202764	0.126	5.52	-0.009	0.0002448	0.343	Male-specific	No	Yes
243804_at	MTMR7	6.377	-0.008	6.06486e-05	0.236	6.281	-0.005	0.288488	0.097	6.495	-0.012	1.48047e-05	0.447	Male-specific	No	Yes
244076_at	NEXMIF	7.168	-0.008	0.000134641	0.218	7.049	-0.004	0.286222	0.098	7.304	-0.011	0.00012643	0.367	Male-specific	No	Yes
244118_at	GABRA1	11.712	-0.017	1.10199e-05	0.275	11.681	-0.013	0.0722048	0.209	11.863	-0.023	4.5359e-05	0.406	Male-specific	No	Yes
244170_at	RAB3C	9.197	-0.03	5.09291e-07	0.341	9.062	-0.022	0.05332	0.232	9.461	-0.038	4.16629e-06	0.499	Male-specific	No	Yes
244194_at	ADAM22	6.038	-0.006	0.000635811	0.182	5.936	-0.003	0.417472	0.065	6.14	-0.008	0.000294393	0.336	Male-specific	No	Yes
244317_at	ELAPOR2	6.617	-0.005	0.00180032	0.157	6.606	-0.003	0.403565	0.069	6.691	-0.008	0.000244394	0.343	Male-specific	No	Yes
244561_at	SLC9A7	5.716	-0.007	2.71374e-06	0.305	5.723	-0.006	0.0504876	0.236	5.748	-0.009	3.29926e-05	0.419	Male-specific	No	Yes
36564_at	RNF19B	7.874	-0.006	0.000138424	0.218	7.87	-0.005	0.140427	0.156	7.932	-0.009	0.0002448	0.343	Male-specific	No	Yes
37079_at	NUS1P3	4.831	-0.006	6.23668e-05	0.236	4.824	-0.005	0.117103	0.171	4.848	-0.006	0.000427867	0.323	Male-specific	No	Yes
1552293_at	TMEM196	5.728	-0.006	7.43373e-07	0.332	5.825	-0.006	0.00944444	0.358	5.69	-0.006	7.46947e-05	0.386	Not in sex-specific list	Overlapping with males	Overlapping with females
1552924_a_at	PITPNM2	7.276	-0.009	4.69423e-08	0.391	7.389	-0.009	0.00439924	0.41	7.233	-0.009	1.7346e-05	0.44	Not in sex-specific list	Overlapping with males	Overlapping with females
201302_at	ANXA4	5.756	0.012	3.69465e-07	0.347	5.657	0.012	0.00789456	0.37	5.789	0.012	0.000148728	0.361	Not in sex-specific list	Overlapping with males	Overlapping with females
201309_x_at	NREP	9.16	-0.021	2.35769e-09	0.45	9.316	-0.019	0.0018488	0.464	9.166	-0.024	1.16689e-06	0.542	Not in sex-specific list	Overlapping with males	Overlapping with females
201924_at	AFF1	6.762	0.012	7.22815e-08	0.38	6.583	0.013	0.00208305	0.456	6.823	0.013	4.17707e-05	0.409	Not in sex-specific list	Overlapping with males	Overlapping with females
202975_s_at	RHOBTB3	8.024	0.018	1.13885e-08	0.419	7.807	0.02	0.000821286	0.513	8.137	0.017	0.000103711	0.374	Not in sex-specific list	Overlapping with males	Overlapping with females
203038_at	PTPRK	9.565	0.007	1.43021e-06	0.318	9.416	0.008	0.00221562	0.452	9.629	0.007	0.000757505	0.3	Not in sex-specific list	Overlapping with males	Overlapping with females
203367_at	DUSP14	7.892	-0.007	2.46547e-06	0.307	7.997	-0.008	0.00104829	0.502	7.829	-0.007	0.00697542	0.211	Not in sex-specific list	Overlapping with males	Overlapping with females
203540_at	GFAP	11.257	0.02	5.63939e-07	0.338	11.001	0.021	0.0130418	0.335	11.366	0.02	5.18014e-05	0.399	Not in sex-specific list	Overlapping with males	Overlapping with females
203723_at	ITPKB	7.667	0.019	9.78477e-07	0.327	7.403	0.02	0.00819131	0.367	7.761	0.019	0.000154643	0.359	Not in sex-specific list	Overlapping with males	Overlapping with females
204041_at	MAOB	8.851	0.009	2.26207e-06	0.309	8.699	0.01	0.0134669	0.333	8.935	0.008	0.000344589	0.33	Not in sex-specific list	Overlapping with males	Overlapping with females
204723_at	SCN3B	11.622	-0.011	6.3139e-07	0.336	11.874	-0.013	0.00323592	0.427	11.493	-0.01	0.000326787	0.332	Not in sex-specific list	Overlapping with males	Overlapping with females
205591_at	OLFM1	13.451	-0.009	2.40002e-06	0.308	13.57	-0.01	0.0140496	0.33	13.411	-0.01	0.000231356	0.345	Not in sex-specific list	Overlapping with males	Overlapping with females
205625_s_at	CALB1	9.941	-0.03	3.32366e-12	0.553	10.34	-0.033	7.03062e-05	0.641	9.746	-0.029	1.16689e-06	0.54	Not in sex-specific list	Overlapping with males	Overlapping with females
205626_s_at	CALB1	10.038	-0.031	2.6043e-12	0.563	10.48	-0.036	6.61628e-05	0.645	9.794	-0.029	1.23176e-06	0.538	Not in sex-specific list	Overlapping with males	Overlapping with females
205630_at	CRH	9.575	-0.026	1.78077e-05	0.265	10.362	-0.032	0.0066845	0.381	9.196	-0.024	0.00172126	0.268	Not in sex-specific list	Overlapping with males	Overlapping with females
205874_at	ITPKA	8.81	-0.01	4.93869e-07	0.341	8.988	-0.012	0.000458264	0.539	8.701	-0.009	0.00416643	0.232	Not in sex-specific list	Overlapping with males	Overlapping with females
206023_at	NMU	6.422	-0.011	3.7009e-06	0.298	6.607	-0.012	0.0103628	0.352	6.363	-0.012	0.000248842	0.342	Not in sex-specific list	Overlapping with males	Overlapping with females
206208_at	CA4	7.253	-0.011	6.92039e-07	0.334	7.482	-0.013	0.0022753	0.45	7.136	-0.01	0.000729478	0.302	Not in sex-specific list	Overlapping with males	Overlapping with females
206209_s_at	CA4	7.606	-0.013	2.54739e-06	0.306	7.845	-0.014	0.00256983	0.442	7.513	-0.013	0.000908141	0.293	Not in sex-specific list	Overlapping with males	Overlapping with females
206577_at	VIP	8.466	-0.022	4.86165e-08	0.389	8.888	-0.026	0.000393657	0.548	8.245	-0.02	0.00037772	0.327	Not in sex-specific list	Overlapping with males	Overlapping with females
208116_s_at	MAN1A1	5.903	-0.014	1.71398e-07	0.362	6.217	-0.017	0.00129435	0.488	5.727	-0.012	0.00052482	0.314	Not in sex-specific list	Overlapping with males	Overlapping with females
208877_at	PAK2	7.149	0.009	9.19902e-07	0.328	7.072	0.008	0.00392217	0.417	7.158	0.01	0.000291816	0.336	Not in sex-specific list	Overlapping with males	Overlapping with females
209869_at	ADRA2A	6.706	-0.012	9.29346e-08	0.375	6.749	-0.012	0.00158585	0.475	6.683	-0.011	0.000568097	0.312	Not in sex-specific list	Overlapping with males	Overlapping with females
210182_at	CORT	7.085	-0.008	1.31867e-05	0.271	7.302	-0.01	0.00458146	0.407	6.964	-0.007	0.00573509	0.219	Not in sex-specific list	Overlapping with males	Overlapping with females
210675_s_at	PTPRR	8.007	-0.013	2.15888e-10	0.485	8.129	-0.014	0.00031189	0.559	7.952	-0.013	1.11663e-05	0.457	Not in sex-specific list	Overlapping with males	Overlapping with females
210817_s_at	CALCOCO2	7.234	0.008	9.54053e-06	0.278	7.009	0.011	0.00405008	0.415	7.362	0.007	0.00576348	0.219	Not in sex-specific list	Overlapping with males	Overlapping with females
212586_at	CAST	8.12	0.008	1.34884e-06	0.32	8.026	0.008	0.00207876	0.456	8.151	0.008	0.00101459	0.289	Not in sex-specific list	Overlapping with males	Overlapping with females
213096_at	TMCC2	7.674	0.007	2.02778e-07	0.359	7.613	0.007	0.00235048	0.447	7.69	0.007	0.000234347	0.344	Not in sex-specific list	Overlapping with males	Overlapping with females
213131_at	OLFM1	12.663	-0.009	2.8204e-08	0.402	12.862	-0.011	0.000808165	0.514	12.57	-0.009	3.45472e-05	0.416	Not in sex-specific list	Overlapping with males	Overlapping with females
213325_at	NECTIN3	7.955	-0.02	3.55494e-11	0.511	8.236	-0.023	0.000103352	0.618	7.816	-0.02	5.75607e-06	0.479	Not in sex-specific list	Overlapping with males	Overlapping with females
213327_s_at	USP12	8.605	-0.007	2.95996e-08	0.401	8.673	-0.007	0.00225246	0.451	8.586	-0.007	2.73546e-05	0.425	Not in sex-specific list	Overlapping with males	Overlapping with females
213496_at	PLPPR4	10.36	-0.012	3.44723e-09	0.443	10.522	-0.013	0.000234576	0.575	10.282	-0.012	6.67266e-05	0.391	Not in sex-specific list	Overlapping with males	Overlapping with females
213791_at	PENK	7.396	-0.016	9.33266e-08	0.375	7.597	-0.017	0.00189179	0.461	7.306	-0.016	0.000208158	0.349	Not in sex-specific list	Overlapping with males	Overlapping with females
214811_at	RIMBP2	9.389	-0.01	5.8563e-07	0.338	9.601	-0.012	0.000535343	0.531	9.282	-0.009	0.00155701	0.273	Not in sex-specific list	Overlapping with males	Overlapping with females
216048_s_at	RHOBTB3	5.754	0.015	1.34171e-06	0.32	5.508	0.018	0.00208305	0.456	5.89	0.014	0.00260288	0.251	Not in sex-specific list	Overlapping with males	Overlapping with females
218623_at	NSG2	10.732	-0.009	4.17869e-08	0.393	10.836	-0.009	0.00146975	0.48	10.72	-0.011	1.16055e-05	0.455	Not in sex-specific list	Overlapping with males	Overlapping with females
218866_s_at	POLR3K	8.092	-0.009	1.15934e-07	0.371	8.187	-0.008	0.00217145	0.454	8.079	-0.01	3.49757e-05	0.416	Not in sex-specific list	Overlapping with males	Overlapping with females
218868_at	ACTR3B	9.766	-0.014	1.121e-11	0.529	10.017	-0.016	8.35416e-05	0.625	9.632	-0.012	1.61735e-06	0.527	Not in sex-specific list	Overlapping with males	Overlapping with females
218888_s_at	NETO2	8.983	-0.015	1.65084e-11	0.523	9.189	-0.017	0.000234576	0.572	8.891	-0.015	1.09014e-06	0.553	Not in sex-specific list	Overlapping with males	Overlapping with females
219939_s_at	CSDE1	9.881	0.007	4.68322e-06	0.294	9.826	0.006	0.0108548	0.348	9.886	0.007	0.000616442	0.308	Not in sex-specific list	Overlapping with males	Overlapping with females
220331_at	CYP46A1	11.005	-0.009	4.96243e-09	0.436	11.254	-0.013	8.71425e-07	0.759	10.827	-0.006	0.00617738	0.216	Not in sex-specific list	Overlapping with males	Overlapping with females
220889_s_at	CA10	9.548	-0.017	3.55494e-11	0.512	9.724	-0.017	0.000328939	0.555	9.487	-0.017	1.13862e-06	0.547	Not in sex-specific list	Overlapping with males	Overlapping with females
221904_at	FAM131A	10.292	-0.008	5.0278e-06	0.292	10.383	-0.008	0.0114703	0.344	10.265	-0.009	0.000742564	0.301	Not in sex-specific list	Overlapping with males	Overlapping with females
222473_s_at	ERBIN	6.858	0.017	2.44069e-07	0.355	6.588	0.018	0.00300387	0.433	6.949	0.018	6.72865e-05	0.39	Not in sex-specific list	Overlapping with males	Overlapping with females
222774_s_at	NETO2	8.042	-0.02	7.14696e-12	0.538	8.326	-0.022	0.000234576	0.572	7.897	-0.019	4.0843e-07	0.579	Not in sex-specific list	Overlapping with males	Overlapping with females
223383_at	ZNRF1	7.802	-0.008	3.44536e-05	0.249	7.898	-0.007	0.0616329	0.221	7.785	-0.009	0.000140708	0.363	Not in sex-specific list	Overlapping with males	Overlapping with females
224840_at	FKBP5	6.246	0.031	6.69612e-09	0.429	5.711	0.036	0.000433449	0.542	6.55	0.027	9.94826e-05	0.376	Not in sex-specific list	Overlapping with males	Overlapping with females
224856_at	FKBP5	5.67	0.023	2.07256e-08	0.408	5.198	0.029	0.000234576	0.574	5.961	0.02	0.000620366	0.308	Not in sex-specific list	Overlapping with males	Overlapping with females
224896_s_at	TTL	9.06	-0.009	5.36484e-10	0.473	9.159	-0.011	0.000167947	0.59	8.981	-0.007	0.000131625	0.365	Not in sex-specific list	Overlapping with males	Overlapping with females
224908_s_at	TTL	8.39	-0.01	1.61012e-08	0.412	8.547	-0.012	0.00120662	0.492	8.289	-0.009	0.000153872	0.36	Not in sex-specific list	Overlapping with males	Overlapping with females
225202_at	RHOBTB3	8.313	0.017	1.71714e-06	0.314	8.012	0.02	0.0058003	0.391	8.478	0.016	0.00119393	0.283	Not in sex-specific list	Overlapping with males	Overlapping with females
225739_at	RAB11FIP4	8.69	-0.008	9.70747e-09	0.422	8.848	-0.01	0.00049675	0.536	8.605	-0.008	6.68261e-05	0.391	Not in sex-specific list	Overlapping with males	Overlapping with females
227015_at	ASPHD2	7.904	-0.01	1.50544e-09	0.457	8.136	-0.012	6.61628e-05	0.647	7.781	-0.009	5.18014e-05	0.399	Not in sex-specific list	Overlapping with males	Overlapping with females
227408_s_at	SNX25	7.52	-0.007	1.99846e-06	0.311	7.713	-0.009	0.00143815	0.481	7.416	-0.006	0.00280451	0.248	Not in sex-specific list	Overlapping with males	Overlapping with females
228135_at	C1orf52	8.951	-0.006	9.33388e-08	0.375	8.983	-0.007	0.00595144	0.389	8.938	-0.006	0.000105872	0.374	Not in sex-specific list	Overlapping with males	Overlapping with females
228368_at	ARHGAP20	8.663	-0.014	2.17491e-08	0.406	8.755	-0.013	0.0039662	0.416	8.667	-0.016	7.26034e-06	0.471	Not in sex-specific list	Overlapping with males	Overlapping with females
228501_at	GALNT15	6.235	0.014	3.25537e-05	0.251	5.964	0.015	0.0105718	0.35	6.338	0.014	0.00263387	0.251	Not in sex-specific list	Overlapping with males	Overlapping with females
229430_at	VXN	10.881	-0.006	3.43171e-08	0.397	11.005	-0.008	0.000393657	0.548	10.804	-0.005	0.000676767	0.305	Not in sex-specific list	Overlapping with males	Overlapping with females
229799_s_at	NCAM1	7.46	0.013	1.83218e-07	0.361	7.448	0.011	0.00494973	0.403	7.387	0.016	2.73546e-05	0.425	Not in sex-specific list	Overlapping with males	Overlapping with females
230765_at	NWD2	8.672	-0.014	2.07244e-09	0.452	8.966	-0.018	7.32141e-05	0.635	8.481	-0.011	0.000353597	0.329	Not in sex-specific list	Overlapping with males	Overlapping with females
230923_at	TAFA1	10.3	-0.015	3.08015e-09	0.446	10.456	-0.015	0.00114382	0.496	10.259	-0.016	5.02328e-06	0.491	Not in sex-specific list	Overlapping with males	Overlapping with females
231186_at	LINC00643	5.144	-0.009	6.10112e-08	0.384	5.31	-0.01	0.000351887	0.552	5.06	-0.008	0.000437568	0.322	Not in sex-specific list	Overlapping with males	Overlapping with females
231935_at	ARPP21	9.233	-0.012	6.58815e-09	0.43	9.345	-0.012	0.000932571	0.507	9.19	-0.012	3.81641e-05	0.412	Not in sex-specific list	Overlapping with males	Overlapping with females
235591_at	SSTR1	8.149	-0.017	6.44126e-11	0.502	8.394	-0.019	0.000151164	0.598	8.032	-0.016	5.02328e-06	0.491	Not in sex-specific list	Overlapping with males	Overlapping with females
236361_at	GALNT15	6.783	0.012	5.94022e-06	0.288	6.564	0.013	0.00441958	0.409	6.881	0.012	0.0022239	0.258	Not in sex-specific list	Overlapping with males	Overlapping with females
236377_at	TMEM132D	8.703	-0.011	4.9082e-11	0.506	8.763	-0.01	0.000431134	0.545	8.718	-0.013	4.0843e-07	0.579	Not in sex-specific list	Overlapping with males	Overlapping with females
244675_at	RGS8	6.504	-0.01	4.86165e-08	0.389	6.701	-0.012	0.00143815	0.481	6.398	-0.009	0.000131625	0.365	Not in sex-specific list	Overlapping with males	Overlapping with females
823_at	CX3CL1	9.284	-0.009	7.03784e-08	0.381	9.483	-0.012	0.00102728	0.503	9.158	-0.007	0.00065964	0.306	Not in sex-specific list	Overlapping with males	Overlapping with females
1438_at	EPHB3	6.156	-0.005	0.00143162	0.163	6.191	-0.004	0.103703	0.181	6.166	-0.006	0.00936134	0.198	Not in sex-specific list	No	Yes
1552264_a_at	MAPK1	7.807	-0.013	4.7839e-08	0.39	7.794	-0.011	0.0090905	0.361	7.87	-0.016	1.12261e-05	0.457	Not in sex-specific list	No	Yes
1552410_at	CLEC4F	5.456	-0.003	0.075641	0.063	5.39	0	0.954723	0.001	5.552	-0.006	0.0101855	0.195	Not in sex-specific list	No	Yes
1552426_a_at	TM2D3	9.928	-0.005	0.00100635	0.171	9.878	-0.003	0.246599	0.11	10.013	-0.008	0.0015904	0.272	Not in sex-specific list	No	Yes
1552481_s_at	MAN1A2	4.997	-0.004	0.0148543	0.106	5.012	-0.002	0.517638	0.047	5.052	-0.007	0.00282963	0.248	Not in sex-specific list	No	Yes
1552658_a_at	NAV3	8.609	-0.011	2.60417e-06	0.305	8.6	-0.01	0.0242922	0.291	8.647	-0.013	0.000296307	0.336	Not in sex-specific list	No	Yes
1552666_a_at	LRRC7	6.972	-0.011	0.000638473	0.182	6.89	-0.008	0.202585	0.127	7.084	-0.014	0.00265069	0.251	Not in sex-specific list	No	Yes
1552715_a_at	RXFP1	7.602	-0.012	0.00392177	0.139	7.474	-0.008	0.351364	0.08	7.754	-0.016	0.0074787	0.208	Not in sex-specific list	No	Yes
1552722_at	ARPP21	7.751	-0.031	7.14696e-12	0.535	7.772	-0.029	0.000934296	0.506	7.821	-0.035	4.0843e-07	0.592	Not in sex-specific list	No	Yes
1552897_a_at	KCNG3	5.605	-0.005	0.000684158	0.18	5.644	-0.005	0.104354	0.18	5.614	-0.007	0.00504411	0.224	Not in sex-specific list	No	Yes
1553136_at	KCTD18	6.273	-0.003	0.111241	0.053	6.175	0	0.912094	0.003	6.392	-0.006	0.0137702	0.182	Not in sex-specific list	No	Yes
1553181_at	DDX31	5.512	-0.002	0.220101	0.034	5.446	0.001	0.82753	0.008	5.627	-0.006	0.016872	0.173	Not in sex-specific list	No	Yes
1553410_a_at	ABCC12	6.341	-0.009	9.90263e-05	0.225	6.549	-0.01	0.0114087	0.344	6.258	-0.009	0.00528863	0.222	Not in sex-specific list	No	Yes
1553510_s_at	CNOT9	7.389	-0.008	7.78534e-07	0.331	7.366	-0.006	0.0112566	0.346	7.443	-0.01	8.90654e-05	0.38	Not in sex-specific list	No	Yes
1553602_at	MUCL1	5.381	-0.004	0.0645426	0.067	5.238	0.001	0.837206	0.008	5.554	-0.008	0.00224335	0.258	Not in sex-specific list	No	Yes
1553713_a_at	RHEBL1	7.125	-0.006	0.00273145	0.148	7.032	-0.003	0.460953	0.057	7.242	-0.009	0.00174627	0.268	Not in sex-specific list	No	Yes
1553864_at	GPR26	8.34	-0.021	6.64427e-09	0.43	8.523	-0.021	0.00186417	0.462	8.296	-0.022	8.3463e-06	0.467	Not in sex-specific list	No	Yes
1553865_a_at	GPR26	9.654	-0.014	1.26689e-08	0.417	9.811	-0.015	0.00137225	0.486	9.604	-0.015	2.51366e-05	0.428	Not in sex-specific list	No	Yes
1554057_at	ASH1L-AS1	6.313	-0.003	0.0469001	0.076	6.17	0	0.912188	0.003	6.451	-0.006	0.00377405	0.236	Not in sex-specific list	No	Yes
1554065_at	MVB12B	5.652	-0.002	0.0502462	0.074	5.54	0	0.906137	0.003	5.767	-0.005	0.00233145	0.256	Not in sex-specific list	No	Yes
1554093_a_at	SNAPC5	8.334	-0.006	0.000209029	0.208	8.359	-0.005	0.0402155	0.253	8.362	-0.008	0.00306587	0.245	Not in sex-specific list	No	Yes
1554099_a_at	SPIN3	5.56	-0.002	0.260266	0.03	5.405	0.002	0.326781	0.086	5.729	-0.006	0.00309127	0.244	Not in sex-specific list	No	Yes
1554112_a_at	ULK2	6.792	-0.007	2.6158e-07	0.353	6.76	-0.007	0.004218	0.412	6.799	-0.007	0.000798016	0.298	Not in sex-specific list	No	Yes
1554145_a_at	PPP1R21	8.153	-0.01	9.67035e-07	0.327	8.086	-0.007	0.0351889	0.263	8.247	-0.013	3.30524e-05	0.418	Not in sex-specific list	No	Yes
1554170_a_at	MBLAC1	6.961	-0.004	0.038369	0.081	6.942	-0.001	0.758919	0.015	7.039	-0.007	0.00401656	0.233	Not in sex-specific list	No	Yes
1554292_a_at	UHRF1BP1L	4.549	-0.007	5.5244e-07	0.339	4.533	-0.005	0.0253487	0.287	4.593	-0.008	2.51366e-05	0.428	Not in sex-specific list	No	Yes
1554333_at	DNAJA4	6.947	-0.017	3.51566e-05	0.249	7.149	-0.017	0.0191172	0.308	6.885	-0.018	0.00283676	0.248	Not in sex-specific list	No	Yes
1554346_at	GNB5	6.075	-0.002	0.198757	0.037	5.936	0.001	0.676273	0.024	6.208	-0.005	0.0147598	0.179	Not in sex-specific list	No	Yes
1554351_a_at	TIPRL	7.286	-0.006	0.000590044	0.184	7.285	-0.005	0.151489	0.151	7.318	-0.008	0.00352453	0.239	Not in sex-specific list	No	Yes
1554365_a_at	PPP2R5C	7.565	-0.008	7.31209e-07	0.333	7.52	-0.006	0.0487355	0.239	7.619	-0.009	1.88521e-05	0.437	Not in sex-specific list	No	Yes
1554393_a_at	AZIN2	7.519	-0.005	0.000213331	0.208	7.563	-0.004	0.0425174	0.249	7.545	-0.007	0.000873072	0.295	Not in sex-specific list	No	Yes
1554396_at	UEVLD	5.117	-0.002	0.171928	0.041	5.025	0.001	0.663724	0.026	5.233	-0.005	0.0152667	0.177	Not in sex-specific list	No	Yes
1554417_s_at	APH1A	6.269	-0.003	0.106068	0.054	6.263	-0.001	0.831974	0.008	6.336	-0.006	0.0231801	0.159	Not in sex-specific list	No	Yes
1554443_s_at	BEST1	5.094	0.006	1.03189e-05	0.277	5.068	0.006	0.00763965	0.372	5.102	0.006	0.0039014	0.235	Not in sex-specific list	No	Yes
1554500_a_at	RGS7	9.055	-0.019	5.68943e-08	0.385	9.209	-0.018	0.00694255	0.379	9.031	-0.021	1.12924e-05	0.456	Not in sex-specific list	No	Yes
1554501_at	TSC22D4	4.73	0.005	0.000993166	0.171	4.72	0.003	0.108611	0.177	4.686	0.007	0.0027113	0.25	Not in sex-specific list	No	Yes
1554509_a_at	MINDY3	7.129	-0.009	1.15493e-06	0.323	7.112	-0.007	0.0384288	0.257	7.204	-0.012	1.11663e-05	0.458	Not in sex-specific list	No	Yes
1554510_s_at	GHITM	10.473	-0.009	2.38426e-07	0.356	10.446	-0.006	0.0127238	0.336	10.547	-0.011	1.07488e-05	0.459	Not in sex-specific list	No	Yes
1554524_a_at	OLFM3	9.443	-0.012	5.25924e-07	0.34	9.583	-0.012	0.0091911	0.36	9.406	-0.013	5.21696e-05	0.399	Not in sex-specific list	No	Yes
1554526_at	OLFM3	8.796	-0.01	1.43025e-05	0.269	8.948	-0.011	0.0187981	0.31	8.755	-0.011	0.000569646	0.311	Not in sex-specific list	No	Yes
1554530_at	VSTM2A	6.914	-0.01	2.51577e-06	0.306	6.92	-0.009	0.0179841	0.313	6.947	-0.012	0.000309265	0.334	Not in sex-specific list	No	Yes
1554539_a_at	RHOF	6.04	-0.006	9.67604e-05	0.226	6.121	-0.006	0.0320829	0.269	6.022	-0.007	0.00271257	0.25	Not in sex-specific list	No	Yes
1554553_s_at	YIF1B	7.915	-0.006	1.1971e-05	0.273	7.985	-0.006	0.0297817	0.275	7.908	-0.007	0.000204476	0.35	Not in sex-specific list	No	Yes
1554569_a_at	CELF2	7.467	-0.008	0.000109255	0.223	7.493	-0.007	0.0620067	0.22	7.499	-0.01	0.00154449	0.273	Not in sex-specific list	No	Yes
1554577_a_at	PSMD10	8.89	-0.005	0.000672855	0.181	8.819	-0.003	0.281419	0.1	8.965	-0.006	0.00165014	0.27	Not in sex-specific list	No	Yes
1554593_s_at	SLC1A6	7.89	-0.013	3.03407e-05	0.252	8.009	-0.012	0.0471063	0.241	7.891	-0.015	0.000351881	0.329	Not in sex-specific list	No	Yes
1554600_s_at	LMNA	5.517	0.004	0.0226316	0.095	5.596	0.001	0.759628	0.015	5.421	0.006	0.00645916	0.214	Not in sex-specific list	No	Yes
1554633_a_at	MYT1L	9.062	-0.026	7.22815e-08	0.38	9.072	-0.022	0.0171406	0.317	9.167	-0.03	5.33964e-06	0.485	Not in sex-specific list	No	Yes
1554678_s_at	HNRNPDL	9.057	-0.006	0.0102164	0.115	8.908	-0.002	0.761926	0.015	9.216	-0.01	0.0015188	0.274	Not in sex-specific list	No	Yes
1554679_a_at	LAPTM4B	7.942	-0.01	6.00379e-05	0.237	8.002	-0.009	0.0589772	0.225	7.944	-0.011	0.00130277	0.279	Not in sex-specific list	No	Yes
1554680_s_at	KCNS2	6.413	-0.003	0.0416344	0.079	6.373	-0.001	0.787441	0.012	6.49	-0.006	0.00616649	0.216	Not in sex-specific list	No	Yes
1554689_a_at	NLGN4X	6.983	-0.008	5.92293e-06	0.288	7.161	-0.009	0.0116894	0.342	6.925	-0.009	8.59301e-05	0.381	Not in sex-specific list	No	Yes
1554767_s_at	CRYZL1	6.545	-0.009	3.02318e-05	0.252	6.563	-0.008	0.0287029	0.278	6.555	-0.009	0.0025532	0.252	Not in sex-specific list	No	Yes
1554768_a_at	MAD2L1	5.946	-0.006	0.00472259	0.134	5.785	-0.002	0.681002	0.024	6.097	-0.009	0.00119075	0.283	Not in sex-specific list	No	Yes
1554789_a_at	PDE8B	8.289	-0.007	0.000712082	0.179	8.385	-0.007	0.135022	0.16	8.293	-0.009	0.00133324	0.279	Not in sex-specific list	No	Yes
1554801_at	FNDC9	8.221	-0.008	0.00115571	0.168	8.228	-0.005	0.203761	0.126	8.32	-0.013	0.000857403	0.295	Not in sex-specific list	No	Yes
1554868_s_at	PCNP	9.185	-0.006	0.00146636	0.162	9.075	-0.003	0.373584	0.075	9.298	-0.009	0.00220149	0.259	Not in sex-specific list	No	Yes
1555020_a_at	ARHGAP20	5.964	-0.007	9.97276e-07	0.326	5.97	-0.005	0.0378067	0.258	6.017	-0.01	4.8557e-06	0.493	Not in sex-specific list	No	Yes
1555088_x_at	STAT5B	7.231	-0.003	0.267647	0.029	7.067	0.003	0.256191	0.107	7.458	-0.01	0.00805913	0.205	Not in sex-specific list	No	Yes
1555092_at	VASH2	5.006	-0.004	0.0841458	0.06	4.943	0	0.968679	0	5.136	-0.008	0.0084423	0.203	Not in sex-specific list	No	Yes
1555098_a_at	CACNB2	7.464	-0.013	1.28135e-08	0.416	7.502	-0.012	0.00520178	0.399	7.493	-0.015	5.33964e-06	0.484	Not in sex-specific list	No	Yes
1555181_a_at	ST3GAL3	7.335	-0.003	0.120644	0.051	7.204	0.001	0.841344	0.007	7.498	-0.008	0.00967803	0.197	Not in sex-specific list	No	Yes
1555388_s_at	SNX25	6.395	-0.006	9.34699e-05	0.227	6.544	-0.007	0.0118241	0.341	6.32	-0.005	0.0108866	0.192	Not in sex-specific list	No	Yes
1555461_at	TXNL4A	7.108	-0.009	2.1024e-05	0.261	7.314	-0.011	0.00392499	0.417	6.994	-0.008	0.010571	0.193	Not in sex-specific list	No	Yes
1555487_a_at	ACTR3B	9.044	-0.013	1.93259e-09	0.453	9.221	-0.014	0.0012161	0.491	8.959	-0.012	5.75607e-06	0.48	Not in sex-specific list	No	Yes
1555611_s_at	MBD1	6.335	-0.006	1.77315e-05	0.265	6.402	-0.007	0.0138994	0.33	6.298	-0.006	0.00470131	0.227	Not in sex-specific list	No	Yes
1555618_s_at	SAE1	9.169	-0.012	8.51289e-09	0.424	9.215	-0.011	0.00756269	0.373	9.189	-0.014	1.58349e-06	0.53	Not in sex-specific list	No	Yes
1555679_a_at	RTN4IP1	6.371	-0.006	0.000650826	0.181	6.295	-0.003	0.307547	0.092	6.466	-0.008	0.000832444	0.297	Not in sex-specific list	No	Yes
1555702_a_at	ST3GAL3	6.674	-0.006	0.000116244	0.222	6.777	-0.006	0.0228155	0.296	6.636	-0.006	0.00601096	0.217	Not in sex-specific list	No	Yes
1555715_a_at	HRH3	6.34	-0.004	0.0258685	0.091	6.318	-0.002	0.52978	0.045	6.403	-0.006	0.0181912	0.169	Not in sex-specific list	No	Yes
1555780_a_at	RHEB	10.022	-0.006	0.000125411	0.22	10.006	-0.005	0.0527872	0.233	10.076	-0.008	0.00158251	0.272	Not in sex-specific list	No	Yes
1555797_a_at	ARPC5	8.095	-0.01	7.50854e-07	0.332	8.107	-0.01	0.00920998	0.36	8.091	-0.01	0.000606525	0.309	Not in sex-specific list	No	Yes
1555800_at	ZNF385B	7.607	-0.01	0.000896973	0.174	7.579	-0.008	0.187435	0.133	7.681	-0.013	0.00398343	0.234	Not in sex-specific list	No	Yes
1555982_at	ZFYVE16	6.25	-0.005	0.00138401	0.164	6.21	-0.003	0.263022	0.105	6.321	-0.007	0.0021521	0.26	Not in sex-specific list	No	Yes
1556066_at	KDM6B	5.904	0.003	0.0326036	0.085	5.995	0.001	0.804962	0.01	5.809	0.006	0.0112581	0.19	Not in sex-specific list	No	Yes
1556151_at	ITFG1	8.539	-0.005	7.53946e-06	0.283	8.544	-0.004	0.0445336	0.245	8.568	-0.006	7.24075e-05	0.388	Not in sex-specific list	No	Yes
1556285_s_at	PPA2	8.122	-0.008	0.00029627	0.2	8.017	-0.005	0.235638	0.114	8.228	-0.01	0.000953034	0.291	Not in sex-specific list	No	Yes
1556894_at	NT5DC2	4.285	0.004	0.0617963	0.068	4.355	0	0.984089	0	4.157	0.008	0.00362235	0.238	Not in sex-specific list	No	Yes
1557042_at	KCNQ3	6.233	-0.005	0.012263	0.111	6.181	-0.003	0.598239	0.035	6.336	-0.009	0.00328337	0.242	Not in sex-specific list	No	Yes
1557180_at	C11orf87	7.66	-0.021	6.5742e-08	0.382	7.747	-0.019	0.00564568	0.392	7.688	-0.024	2.58834e-05	0.427	Not in sex-specific list	No	Yes
1557181_s_at	C11orf87	9.881	-0.018	1.71398e-07	0.362	9.914	-0.015	0.00944148	0.358	9.98	-0.023	9.07931e-06	0.464	Not in sex-specific list	No	Yes
1557194_a_at	RAD54L2	6.228	-0.003	0.0838463	0.06	6.174	0	0.985114	0	6.329	-0.006	0.00664778	0.213	Not in sex-specific list	No	Yes
1557388_at	RTTN	5.456	-0.003	0.138626	0.047	5.309	0.002	0.682701	0.024	5.639	-0.008	0.00502719	0.224	Not in sex-specific list	No	Yes
1557475_at	LINC00507	8.027	-0.02	2.60417e-06	0.306	8.446	-0.023	0.00218065	0.453	7.845	-0.02	0.00121452	0.282	Not in sex-specific list	No	Yes
1557795_s_at	NTRK3	6.987	-0.004	0.0089765	0.118	6.951	-0.002	0.598454	0.035	7.066	-0.007	0.00150303	0.274	Not in sex-specific list	No	Yes
1557799_at	SELENOH	6.224	-0.003	0.0132938	0.108	6.224	-0.002	0.41159	0.067	6.268	-0.005	0.00872148	0.201	Not in sex-specific list	No	Yes
1557801_x_at	SELENOH	6.226	-0.003	0.00325065	0.143	6.228	-0.002	0.250603	0.109	6.264	-0.005	0.00398212	0.234	Not in sex-specific list	No	Yes
1557961_s_at	C8orf88	7.604	-0.01	0.00515538	0.132	7.306	-0.003	0.741366	0.017	7.898	-0.017	0.000803352	0.298	Not in sex-specific list	No	Yes
1558122_s_at	CSRNP3	6.918	-0.007	0.0173399	0.102	6.726	-0.002	0.829041	0.008	7.133	-0.013	0.00111537	0.286	Not in sex-specific list	No	Yes
1558136_s_at	TAF11	7.088	-0.007	8.69741e-06	0.28	7.161	-0.009	0.00785054	0.37	7.029	-0.006	0.0081603	0.204	Not in sex-specific list	No	Yes
1558195_at	LINC00592	6.071	-0.004	0.00519569	0.132	6.01	-0.002	0.530997	0.044	6.159	-0.007	0.00211227	0.261	Not in sex-specific list	No	Yes
1558230_at	SF3B2	5.951	-0.002	0.164552	0.042	5.862	0.001	0.685	0.023	6.084	-0.006	0.00829264	0.204	Not in sex-specific list	No	Yes
1558295_a_at	PPFIA2	9.239	-0.006	4.04293e-05	0.246	9.288	-0.006	0.00308114	0.432	9.234	-0.007	0.00663769	0.213	Not in sex-specific list	No	Yes
1558414_at	FRRS1L	9.139	-0.013	1.8188e-05	0.264	9.227	-0.012	0.031767	0.27	9.16	-0.016	0.00043144	0.322	Not in sex-specific list	No	Yes
1558604_a_at	SSBP2	7.128	-0.007	0.000168623	0.213	7.144	-0.006	0.0611007	0.222	7.157	-0.008	0.0025812	0.252	Not in sex-specific list	No	Yes
1558820_a_at	CCDC178	5.279	-0.003	0.212084	0.035	5.171	0.001	0.680223	0.024	5.43	-0.007	0.0137968	0.182	Not in sex-specific list	No	Yes
1559479_at	SEPSECS-AS1	3.899	0.004	0.00514077	0.132	3.905	0.002	0.466641	0.056	3.846	0.006	0.000925756	0.293	Not in sex-specific list	No	Yes
1559526_at	LOC101930421	5.362	0.009	0.000379341	0.194	5.421	0.008	0.148366	0.152	5.31	0.01	0.00430358	0.231	Not in sex-specific list	No	Yes
1560081_at	RAD51-AS1	5.432	0.002	0.10163	0.055	5.501	0	0.886925	0.004	5.33	0.005	0.00200344	0.262	Not in sex-specific list	No	Yes
1560151_x_at	SLC29A2	6.043	-0.004	0.011766	0.112	6.027	-0.002	0.436621	0.061	6.098	-0.006	0.00912346	0.2	Not in sex-specific list	No	Yes
1560589_a_at	LINC02683	5.345	-0.002	0.224592	0.034	5.204	0.002	0.600572	0.034	5.497	-0.006	0.016997	0.172	Not in sex-specific list	No	Yes
1560692_at	VSTM2A-OT1	6.816	-0.014	1.74573e-06	0.314	6.809	-0.012	0.0366564	0.26	6.869	-0.016	7.04895e-05	0.388	Not in sex-specific list	No	Yes
1560826_at	LOC101929398	5.06	-0.003	0.0735145	0.064	5.006	0	0.965866	0	5.156	-0.006	0.00430142	0.231	Not in sex-specific list	No	Yes
1561060_at	LOC101929752	5.571	-0.002	0.236331	0.032	5.421	0.002	0.425653	0.064	5.745	-0.007	0.00394236	0.234	Not in sex-specific list	No	Yes
1562012_at	LOC100506730	4.898	0.005	0.0391845	0.081	4.982	0.001	0.854377	0.006	4.767	0.009	0.00472111	0.227	Not in sex-specific list	No	Yes
1562254_at	STK35	5.912	-0.002	0.190766	0.038	5.838	0.001	0.806867	0.01	6.028	-0.006	0.0105793	0.193	Not in sex-specific list	No	Yes
1562409_s_at	LOC101926984	6.081	-0.004	0.103437	0.055	6.03	0	0.977293	0	6.204	-0.008	0.013258	0.183	Not in sex-specific list	No	Yes
1562563_at	HCN1	6.191	-0.004	0.0128244	0.109	6.162	-0.002	0.430972	0.063	6.251	-0.006	0.0129269	0.185	Not in sex-specific list	No	Yes
1563034_at	GPD1	4.308	0.002	0.0627724	0.068	4.346	0	0.972296	0	4.228	0.005	0.00198573	0.263	Not in sex-specific list	No	Yes
1563111_a_at	PIGX	7.379	-0.007	2.69577e-05	0.255	7.429	-0.006	0.0337373	0.266	7.383	-0.008	0.000780896	0.299	Not in sex-specific list	No	Yes
1563744_a_at	DISC1	5.398	-0.003	0.0579749	0.07	5.303	0	0.992714	0	5.512	-0.006	0.00586619	0.218	Not in sex-specific list	No	Yes
1564063_a_at	ATP11B	6.033	-0.005	0.0509728	0.074	6.013	-0.002	0.723604	0.019	6.125	-0.008	0.0121358	0.187	Not in sex-specific list	No	Yes
1564129_a_at	QPRT	6.53	-0.003	0.229847	0.033	6.45	0.001	0.743888	0.016	6.663	-0.007	0.0202027	0.164	Not in sex-specific list	No	Yes
1564883_a_at	TAS1R1	4.934	-0.002	0.127602	0.049	4.829	0.001	0.813867	0.009	5.057	-0.006	0.0056517	0.22	Not in sex-specific list	No	Yes
1568827_at	LOC401442	5.562	-0.004	0.012303	0.11	5.479	-0.001	0.693288	0.022	5.658	-0.006	0.0036429	0.237	Not in sex-specific list	No	Yes
1569013_s_at	BMS1P20	5.671	-0.008	1.02811e-05	0.277	5.664	-0.006	0.0496721	0.237	5.721	-0.01	0.000168497	0.356	Not in sex-specific list	No	Yes
1569089_a_at	LINC00957	6.326	-0.005	0.00596089	0.129	6.373	-0.004	0.2042	0.126	6.349	-0.007	0.0127419	0.185	Not in sex-specific list	No	Yes
1569421_at	CLDN4	5.965	-0.002	0.24996	0.031	5.881	0.001	0.744041	0.016	6.083	-0.005	0.010886	0.192	Not in sex-specific list	No	Yes
1569700_s_at	AK7	5.717	-0.004	0.0266367	0.091	5.686	-0.002	0.665976	0.026	5.795	-0.007	0.00704368	0.21	Not in sex-specific list	No	Yes
1569905_at	HSD11B1L	7.277	-0.007	5.20555e-07	0.34	7.365	-0.008	0.00277877	0.437	7.216	-0.006	0.00189386	0.265	Not in sex-specific list	No	Yes
1570185_at	LOC105378568	6.556	-0.003	0.0373541	0.082	6.57	-0.002	0.588644	0.036	6.602	-0.005	0.0108356	0.192	Not in sex-specific list	No	Yes
200015_s_at	SEPTIN2	9.699	0.009	0.000142941	0.217	9.603	0.009	0.0479405	0.24	9.712	0.011	0.00314148	0.244	Not in sex-specific list	No	Yes
200068_s_at	CANX	10.721	0.005	2.52023e-07	0.354	10.682	0.005	0.00844782	0.365	10.728	0.006	7.48383e-05	0.386	Not in sex-specific list	No	Yes
200097_s_at	HNRNPK	10.501	-0.001	0.400597	0.018	10.366	0.002	0.295452	0.096	10.648	-0.005	0.00519615	0.223	Not in sex-specific list	No	Yes
200603_at	PRKAR1A	11.78	-0.003	0.0577401	0.07	11.689	0	0.977187	0	11.896	-0.006	0.0108449	0.192	Not in sex-specific list	No	Yes
200604_s_at	PRKAR1A	10.032	-0.012	1.02488e-06	0.326	10.029	-0.011	0.0228763	0.295	10.069	-0.014	0.000115536	0.371	Not in sex-specific list	No	Yes
200605_s_at	PRKAR1A	11.674	-0.004	0.0016533	0.159	11.634	-0.003	0.330262	0.086	11.733	-0.006	0.00210515	0.261	Not in sex-specific list	No	Yes
200638_s_at	YWHAZ	12.391	-0.008	1.34916e-06	0.32	12.512	-0.008	0.00527889	0.398	12.359	-0.009	0.000191548	0.352	Not in sex-specific list	No	Yes
200641_s_at	YWHAZ	12.155	-0.016	1.61118e-08	0.412	12.28	-0.016	0.00218065	0.453	12.135	-0.017	1.73435e-05	0.441	Not in sex-specific list	No	Yes
200677_at	PTTG1IP	8.654	0.011	0.000134657	0.218	8.503	0.01	0.0515497	0.234	8.672	0.013	0.00121562	0.282	Not in sex-specific list	No	Yes
200696_s_at	GSN	8.67	0.013	6.29921e-06	0.287	8.528	0.015	0.00503688	0.402	8.738	0.013	0.00394506	0.234	Not in sex-specific list	No	Yes
200701_at	NPC2	7.77	0.01	0.000168556	0.213	7.669	0.01	0.073314	0.208	7.79	0.011	0.00224384	0.258	Not in sex-specific list	No	Yes
200704_at	LITAF	7.05	0.01	0.000110365	0.223	7.084	0.008	0.0596175	0.224	6.97	0.013	0.00194422	0.264	Not in sex-specific list	No	Yes
200713_s_at	MAPRE1	8.401	0.006	0.00181599	0.157	8.39	0.005	0.185112	0.134	8.364	0.008	0.00670703	0.212	Not in sex-specific list	No	Yes
200739_s_at	SUMO3	8.308	-0.009	2.98025e-06	0.303	8.339	-0.009	0.0182263	0.312	8.302	-0.009	0.000673721	0.305	Not in sex-specific list	No	Yes
200749_at	RAN	10.557	-0.006	5.64849e-06	0.29	10.597	-0.005	0.0251928	0.288	10.584	-0.008	4.5359e-05	0.405	Not in sex-specific list	No	Yes
200750_s_at	RAN	10.474	-0.006	0.000104532	0.224	10.465	-0.005	0.0631527	0.219	10.505	-0.007	0.0023901	0.255	Not in sex-specific list	No	Yes
200753_x_at	SRSF2	8.668	-0.005	0.0156043	0.104	8.539	-0.002	0.729499	0.018	8.812	-0.009	0.00500561	0.225	Not in sex-specific list	No	Yes
200756_x_at	CALU	7.414	-0.004	0.00369914	0.14	7.381	-0.002	0.274948	0.102	7.475	-0.006	0.00615548	0.216	Not in sex-specific list	No	Yes
200768_s_at	MAT2A	9.086	0.005	0.000784417	0.177	9.121	0.004	0.246599	0.11	9.024	0.007	0.00158023	0.272	Not in sex-specific list	No	Yes
200772_x_at	PTMA	10.714	0.008	0.000404985	0.192	10.845	0.004	0.204215	0.126	10.557	0.013	0.00094551	0.292	Not in sex-specific list	No	Yes
200773_x_at	PTMA	11.383	0.004	0.000801753	0.177	11.44	0.002	0.333156	0.085	11.311	0.006	0.000822381	0.297	Not in sex-specific list	No	Yes
200776_s_at	BZW1	8.938	-0.008	6.49332e-07	0.335	8.906	-0.007	0.0202376	0.304	8.999	-0.01	4.77625e-05	0.403	Not in sex-specific list	No	Yes
200791_s_at	IQGAP1	6.498	0.008	0.000388224	0.193	6.513	0.006	0.10115	0.183	6.441	0.01	0.00336759	0.241	Not in sex-specific list	No	Yes
200797_s_at	MCL1	7.934	0.009	9.62916e-05	0.226	7.868	0.008	0.0691423	0.212	7.935	0.01	0.00132443	0.279	Not in sex-specific list	No	Yes
200820_at	PSMD8	9.78	-0.008	4.53858e-08	0.391	9.825	-0.008	0.00546885	0.395	9.774	-0.009	2.96819e-05	0.422	Not in sex-specific list	No	Yes
200825_s_at	HYOU1	9.734	0.004	1.37025e-05	0.27	9.782	0.003	0.0288118	0.277	9.691	0.005	0.00105924	0.288	Not in sex-specific list	No	Yes
200832_s_at	SCD	10.654	0.007	0.014554	0.106	10.803	0.003	0.623501	0.031	10.49	0.011	0.00872526	0.201	Not in sex-specific list	No	Yes
200836_s_at	MAP4	7.685	0.004	0.00164923	0.159	7.726	0.002	0.24204	0.112	7.616	0.006	0.00243374	0.254	Not in sex-specific list	No	Yes
200849_s_at	AHCYL1	9.993	0.011	7.06716e-06	0.285	9.795	0.013	0.0078646	0.37	10.101	0.01	0.00306575	0.245	Not in sex-specific list	No	Yes
200850_s_at	AHCYL1	10.751	0.011	1.4716e-05	0.269	10.543	0.013	0.0139473	0.33	10.847	0.011	0.0016917	0.269	Not in sex-specific list	No	Yes
200853_at	H2AZ1	9.226	-0.007	1.75188e-05	0.265	9.188	-0.005	0.040692	0.253	9.299	-0.01	0.000322047	0.333	Not in sex-specific list	No	Yes
200859_x_at	FLNA	6.909	0.004	0.0191114	0.099	6.986	0.002	0.623665	0.031	6.821	0.007	0.0113491	0.19	Not in sex-specific list	No	Yes
200864_s_at	RAB11A	8.587	-0.006	0.000187963	0.21	8.636	-0.006	0.0389818	0.256	8.579	-0.006	0.0069778	0.211	Not in sex-specific list	No	Yes
200880_at	DNAJA1	11.377	-0.007	1.64171e-06	0.315	11.454	-0.007	0.00903372	0.361	11.352	-0.007	0.000363877	0.328	Not in sex-specific list	No	Yes
200881_s_at	DNAJA1	11.099	-0.01	1.19079e-06	0.322	11.223	-0.011	0.00222019	0.452	11.023	-0.009	0.00317799	0.243	Not in sex-specific list	No	Yes
200897_s_at	PALLD	7.419	0.01	0.00065442	0.181	7.413	0.008	0.212218	0.123	7.345	0.013	0.00110856	0.286	Not in sex-specific list	No	Yes
200947_s_at	GLUD1	9.768	0.006	0.00736365	0.123	9.783	0.005	0.330143	0.086	9.717	0.008	0.0142286	0.18	Not in sex-specific list	No	Yes
200954_at	ATP6V0C	11.038	-0.005	0.000440376	0.19	11.098	-0.005	0.0286721	0.278	11.037	-0.006	0.00794239	0.205	Not in sex-specific list	No	Yes
200965_s_at	ABLIM1	9.599	0.005	0.00311904	0.144	9.557	0.005	0.137975	0.158	9.589	0.006	0.0158797	0.175	Not in sex-specific list	No	Yes
200989_at	HIF1A	9.943	0.007	0.000128514	0.219	9.816	0.008	0.0184345	0.311	10.006	0.007	0.0132311	0.184	Not in sex-specific list	No	Yes
201028_s_at	CD99	6.824	0.009	0.0120417	0.111	6.252	0.011	0.0265659	0.283	7.006	0.012	0.00495814	0.225	Not in sex-specific list	No	Yes
201050_at	PLD3	10.418	-0.006	0.000417511	0.192	10.475	-0.006	0.050315	0.236	10.42	-0.007	0.00627833	0.215	Not in sex-specific list	No	Yes
201056_at	GOLGB1	7.774	0.005	8.48254e-08	0.377	7.707	0.006	0.00186417	0.462	7.803	0.005	0.000161407	0.358	Not in sex-specific list	No	Yes
201061_s_at	STOM	8.237	0.012	0.000130198	0.219	8.002	0.014	0.029531	0.276	8.333	0.013	0.00495814	0.225	Not in sex-specific list	No	Yes
201075_s_at	SMARCC1	5.596	0.004	0.062222	0.068	5.663	0.001	0.832892	0.008	5.489	0.007	0.0169979	0.172	Not in sex-specific list	No	Yes
201078_at	TM9SF2	9.398	-0.006	1.49626e-06	0.317	9.395	-0.005	0.0118453	0.341	9.435	-0.008	0.000124784	0.367	Not in sex-specific list	No	Yes
201087_at	PXN	6.073	0.006	0.000109694	0.223	6.065	0.006	0.0740531	0.207	6.067	0.007	0.00305272	0.245	Not in sex-specific list	No	Yes
201096_s_at	ARF4	8.587	-0.005	0.00138077	0.164	8.546	-0.003	0.321804	0.088	8.661	-0.008	0.00140194	0.277	Not in sex-specific list	No	Yes
201151_s_at	MBNL1	7.049	-0.007	0.0372156	0.082	6.742	-0.001	0.954838	0.001	7.31	-0.012	0.0039434	0.234	Not in sex-specific list	No	Yes
201154_x_at	RPL4	11.587	0.004	0.00114307	0.168	11.57	0.003	0.189476	0.132	11.558	0.006	0.00198596	0.263	Not in sex-specific list	No	Yes
201180_s_at	GNAI3	7.42	0.007	0.00187014	0.156	7.396	0.005	0.22409	0.119	7.365	0.009	0.00224936	0.258	Not in sex-specific list	No	Yes
201185_at	HTRA1	10.063	0.008	0.00189759	0.156	10.024	0.007	0.100531	0.183	10.042	0.01	0.0167003	0.173	Not in sex-specific list	No	Yes
201237_at	CAPZA2	9.197	-0.012	1.84561e-07	0.361	9.116	-0.009	0.0272822	0.282	9.299	-0.015	1.11663e-05	0.457	Not in sex-specific list	No	Yes
201238_s_at	CAPZA2	10.612	-0.01	3.43171e-08	0.398	10.54	-0.008	0.0112828	0.345	10.695	-0.012	8.23068e-06	0.468	Not in sex-specific list	No	Yes
201245_s_at	OTUB1	9.035	-0.009	5.70796e-05	0.238	9.117	-0.009	0.0636999	0.218	9.008	-0.009	0.000920103	0.293	Not in sex-specific list	No	Yes
201275_at	FDPS	8.741	-0.004	0.0015669	0.161	8.727	-0.003	0.180798	0.136	8.777	-0.006	0.00747084	0.208	Not in sex-specific list	No	Yes
201284_s_at	APEH	8.084	-0.006	2.70711e-05	0.255	8.146	-0.006	0.0214534	0.3	8.068	-0.007	0.0021654	0.26	Not in sex-specific list	No	Yes
201304_at	NDUFA5	10.948	-0.005	0.0124436	0.11	10.869	-0.002	0.571093	0.039	11.067	-0.008	0.005529	0.221	Not in sex-specific list	No	Yes
201305_x_at	ANP32B	7.851	0.01	2.60417e-06	0.305	7.84	0.008	0.0233276	0.294	7.801	0.012	9.60552e-05	0.377	Not in sex-specific list	No	Yes
201306_s_at	ANP32B	8.865	0.01	8.69741e-06	0.28	8.809	0.008	0.0384924	0.257	8.812	0.013	3.53002e-05	0.415	Not in sex-specific list	No	Yes
201317_s_at	PSMA2	9.409	-0.003	0.00283363	0.147	9.378	-0.002	0.284247	0.099	9.455	-0.005	0.00643505	0.214	Not in sex-specific list	No	Yes
201336_at	VAMP3	8.488	0.012	3.86905e-06	0.297	8.318	0.012	0.0090905	0.361	8.528	0.013	0.000288717	0.337	Not in sex-specific list	No	Yes
201345_s_at	UBE2D2	8.737	-0.006	5.73625e-06	0.289	8.725	-0.005	0.0315798	0.271	8.76	-0.007	0.000504352	0.316	Not in sex-specific list	No	Yes
201346_at	ADIPOR2	8.114	0.008	3.3262e-05	0.25	7.999	0.008	0.0175779	0.315	8.131	0.01	0.00106434	0.287	Not in sex-specific list	No	Yes
201364_s_at	OAZ2	9.58	-0.005	6.0465e-06	0.288	9.574	-0.005	0.0241653	0.291	9.598	-0.006	0.000671811	0.305	Not in sex-specific list	No	Yes
201367_s_at	ZFP36L2	3.956	0.006	0.00363213	0.141	4.043	0.003	0.476162	0.054	3.834	0.01	0.00191948	0.264	Not in sex-specific list	No	Yes
201373_at	PLEC	7.285	0.005	2.93722e-06	0.303	7.247	0.004	0.0184859	0.311	7.27	0.006	3.81641e-05	0.412	Not in sex-specific list	No	Yes
201376_s_at	HNRNPF	6.708	0.005	0.00212382	0.153	6.63	0.004	0.134021	0.16	6.69	0.007	0.00125158	0.281	Not in sex-specific list	No	Yes
201397_at	PHGDH	7.985	0.007	0.000752711	0.178	8.088	0.004	0.281767	0.1	7.884	0.009	0.00214052	0.26	Not in sex-specific list	No	Yes
201398_s_at	TRAM1	8.111	0.007	0.00175959	0.158	8.104	0.006	0.16908	0.142	8.062	0.01	0.00734246	0.209	Not in sex-specific list	No	Yes
201435_s_at	EIF4E	9.128	-0.01	1.0638e-06	0.325	9.14	-0.008	0.0145815	0.327	9.174	-0.012	6.91699e-05	0.389	Not in sex-specific list	No	Yes
201444_s_at	ATP6AP2	10.768	-0.009	3.04277e-07	0.351	10.698	-0.006	0.0392322	0.255	10.87	-0.012	5.02328e-06	0.49	Not in sex-specific list	No	Yes
201485_s_at	RCN2	9.55	-0.005	0.00116978	0.168	9.453	-0.003	0.409586	0.067	9.649	-0.008	0.00105322	0.288	Not in sex-specific list	No	Yes
201486_at	RCN2	9.138	-0.006	0.000129459	0.219	9.117	-0.005	0.073696	0.207	9.189	-0.008	0.0016685	0.27	Not in sex-specific list	No	Yes
201502_s_at	NFKBIA	7.828	0.011	2.28233e-05	0.259	7.82	0.009	0.044452	0.246	7.767	0.014	0.000446565	0.321	Not in sex-specific list	No	Yes
201520_s_at	GRSF1	9.011	-0.007	7.237e-06	0.284	8.998	-0.006	0.0347762	0.264	9.037	-0.007	0.000523045	0.315	Not in sex-specific list	No	Yes
201523_x_at	UBE2N	9.383	-0.009	4.67862e-07	0.342	9.352	-0.006	0.0336075	0.266	9.456	-0.011	7.19119e-06	0.472	Not in sex-specific list	No	Yes
201538_s_at	DUSP3	6.883	-0.01	2.39622e-07	0.356	6.948	-0.011	0.0175022	0.315	6.861	-0.011	2.49352e-05	0.429	Not in sex-specific list	No	Yes
201553_s_at	LAMP1	10.699	0.006	1.85617e-05	0.264	10.647	0.005	0.0377398	0.258	10.684	0.008	0.000140059	0.363	Not in sex-specific list	No	Yes
201560_at	CLIC4	7.819	0.012	0.000179895	0.212	7.717	0.011	0.036795	0.26	7.825	0.013	0.00505593	0.224	Not in sex-specific list	No	Yes
201613_s_at	AP1G2	6.518	0.008	3.99261e-05	0.246	6.302	0.009	0.0134669	0.333	6.615	0.007	0.0018107	0.267	Not in sex-specific list	No	Yes
201629_s_at	ACP1	8.296	-0.012	9.62715e-07	0.327	8.338	-0.012	0.00311268	0.43	8.293	-0.012	0.00102992	0.289	Not in sex-specific list	No	Yes
201651_s_at	PACSIN2	8.144	0.006	6.51536e-07	0.335	8.173	0.005	0.0178181	0.314	8.101	0.007	7.49259e-05	0.386	Not in sex-specific list	No	Yes
201669_s_at	MARCKS	10.908	-0.005	0.00566717	0.13	10.85	-0.003	0.254601	0.108	10.99	-0.007	0.0118134	0.188	Not in sex-specific list	No	Yes
201674_s_at	AKAP1	8.151	0.007	1.52749e-07	0.365	8.095	0.007	0.00496491	0.403	8.151	0.008	3.73326e-05	0.413	Not in sex-specific list	No	Yes
201689_s_at	TPD52	10.122	-0.007	0.0175604	0.101	9.929	-0.001	0.817872	0.009	10.344	-0.013	0.00430358	0.231	Not in sex-specific list	No	Yes
201691_s_at	TPD52	7.481	-0.008	0.00160169	0.16	7.501	-0.007	0.163793	0.144	7.509	-0.009	0.00923882	0.199	Not in sex-specific list	No	Yes
201705_at	PSMD7	9.189	-0.008	6.61416e-07	0.335	9.202	-0.007	0.0243592	0.291	9.22	-0.01	2.96819e-05	0.422	Not in sex-specific list	No	Yes
201713_s_at	RANBP2	8.753	-0.004	0.00151899	0.161	8.8	-0.004	0.0678348	0.214	8.743	-0.005	0.0239159	0.157	Not in sex-specific list	No	Yes
201739_at	SGK1	7.717	0.016	4.86418e-06	0.293	7.489	0.016	0.0064942	0.383	7.777	0.018	0.000610988	0.309	Not in sex-specific list	No	Yes
201752_s_at	ADD3	9.39	0.012	1.04671e-05	0.276	9.318	0.011	0.0261086	0.285	9.379	0.014	0.000508056	0.316	Not in sex-specific list	No	Yes
201753_s_at	ADD3	9.65	0.013	8.10382e-06	0.282	9.594	0.012	0.0389751	0.256	9.62	0.015	0.000179184	0.354	Not in sex-specific list	No	Yes
201768_s_at	CLINT1	8.015	-0.005	0.00258587	0.149	7.988	-0.003	0.229682	0.117	8.083	-0.007	0.0036573	0.237	Not in sex-specific list	No	Yes
201795_at	LBR	5.459	0.008	0.00135523	0.164	5.393	0.007	0.116225	0.172	5.437	0.01	0.00660667	0.213	Not in sex-specific list	No	Yes
201820_at	KRT5	5.942	-0.003	0.0949804	0.057	5.881	0	0.943599	0.001	6.043	-0.006	0.0148	0.178	Not in sex-specific list	No	Yes
201821_s_at	TIMM17A	9.118	-0.015	1.14972e-08	0.419	9.169	-0.013	0.00618142	0.387	9.165	-0.018	1.61735e-06	0.528	Not in sex-specific list	No	Yes
201824_at	RNF14	8.73	-0.003	0.0263705	0.091	8.694	-0.002	0.465408	0.056	8.794	-0.005	0.0247654	0.156	Not in sex-specific list	No	Yes
201841_s_at	HSPB1	8.536	0.011	0.0119256	0.111	8.739	0.004	0.695378	0.022	8.261	0.019	0.00255968	0.252	Not in sex-specific list	No	Yes
201866_s_at	NR3C1	7.756	-0.007	2.86553e-05	0.254	7.729	-0.006	0.0496179	0.238	7.807	-0.009	0.000830953	0.297	Not in sex-specific list	No	Yes
201881_s_at	ARIH1	8.071	-0.007	1.04768e-06	0.325	8.088	-0.007	0.0255956	0.286	8.08	-0.008	7.49259e-05	0.386	Not in sex-specific list	No	Yes
201889_at	FAM3C	11.063	-0.007	0.00311904	0.144	10.95	-0.002	0.463194	0.056	11.219	-0.011	0.00155018	0.273	Not in sex-specific list	No	Yes
201910_at	FARP1	8.014	0.003	0.00805689	0.121	8.117	0.001	0.773242	0.013	7.919	0.005	0.00156608	0.273	Not in sex-specific list	No	Yes
201939_at	PLK2	10	-0.009	2.60417e-06	0.305	10.03	-0.008	0.022306	0.297	10.038	-0.012	8.11294e-05	0.384	Not in sex-specific list	No	Yes
201946_s_at	CCT2	9.057	-0.009	5.31999e-07	0.34	9.1	-0.008	0.00728282	0.375	9.058	-0.009	0.000198552	0.351	Not in sex-specific list	No	Yes
201976_s_at	MYO10	8.719	0.011	0.000892521	0.174	8.789	0.008	0.198707	0.128	8.612	0.014	0.00379026	0.236	Not in sex-specific list	No	Yes
201987_at	MED13	8.87	0.006	0.000682174	0.18	8.885	0.004	0.165546	0.143	8.816	0.008	0.00244222	0.254	Not in sex-specific list	No	Yes
201991_s_at	KIF5B	9.448	0.01	3.95093e-05	0.246	9.406	0.009	0.0229777	0.295	9.408	0.013	0.0011126	0.286	Not in sex-specific list	No	Yes
201997_s_at	SPEN	8.054	0.006	0.000109694	0.223	8.027	0.005	0.0696762	0.212	8.028	0.007	0.000831003	0.297	Not in sex-specific list	No	Yes
202011_at	TJP1	9.426	0.009	0.000317866	0.198	9.393	0.007	0.0924844	0.189	9.39	0.011	0.0026501	0.251	Not in sex-specific list	No	Yes
202050_s_at	ZMYM4	8.308	-0.004	0.00297561	0.145	8.282	-0.002	0.185777	0.134	8.371	-0.006	0.00378972	0.236	Not in sex-specific list	No	Yes
202058_s_at	KPNA1	7.075	-0.008	5.35296e-06	0.291	7.182	-0.009	0.00789456	0.37	7.02	-0.008	0.00259778	0.251	Not in sex-specific list	No	Yes
202077_at	NDUFAB1	11.285	-0.005	0.000233501	0.205	11.279	-0.004	0.147752	0.153	11.318	-0.006	0.00102132	0.289	Not in sex-specific list	No	Yes
202113_s_at	SNX2	8.135	-0.008	4.87336e-05	0.242	8.069	-0.006	0.0712417	0.21	8.193	-0.009	0.00169636	0.269	Not in sex-specific list	No	Yes
202119_s_at	CPNE3	7.389	0.009	0.000605387	0.183	7.391	0.007	0.160429	0.146	7.33	0.011	0.00250407	0.253	Not in sex-specific list	No	Yes
202123_s_at	ABL1	7.426	0.004	0.00298189	0.145	7.447	0.003	0.29205	0.097	7.371	0.006	0.00439489	0.23	Not in sex-specific list	No	Yes
202143_s_at	COPS8	9.562	-0.01	8.66506e-08	0.376	9.573	-0.009	0.00760914	0.372	9.597	-0.012	2.72281e-05	0.425	Not in sex-specific list	No	Yes
202161_at	PKN1	5.915	0.004	0.0063092	0.127	5.894	0.003	0.349741	0.081	5.871	0.007	0.00286973	0.247	Not in sex-specific list	No	Yes
202165_at	PPP1R2	7.993	-0.003	0.0676303	0.066	7.822	0.001	0.778108	0.013	8.176	-0.008	0.00229478	0.257	Not in sex-specific list	No	Yes
202172_at	VEZF1	7.065	0.006	0.000471026	0.189	7.113	0.004	0.171122	0.141	6.982	0.009	0.00155777	0.273	Not in sex-specific list	No	Yes
202185_at	PLOD3	6.932	0.005	0.00421246	0.137	7.024	0.002	0.624985	0.031	6.812	0.008	0.000955633	0.291	Not in sex-specific list	No	Yes
202189_x_at	PTBP1	6.407	0.006	0.00181847	0.157	6.323	0.006	0.0599709	0.223	6.428	0.006	0.0234408	0.158	Not in sex-specific list	No	Yes
202213_s_at	CUL4B	7.095	-0.009	3.17905e-05	0.251	7.074	-0.008	0.0712291	0.21	7.127	-0.009	0.000878318	0.294	Not in sex-specific list	No	Yes
202219_at	SLC6A8	8.481	0.01	1.32035e-07	0.368	8.436	0.008	0.0090905	0.361	8.442	0.012	5.33964e-06	0.485	Not in sex-specific list	No	Yes
202253_s_at	DNM2	6.336	0.005	0.00209309	0.154	6.38	0.003	0.240564	0.113	6.243	0.009	0.00244182	0.254	Not in sex-specific list	No	Yes
202283_at	SERPINF1	9.834	-0.008	0.000277945	0.201	9.827	-0.006	0.0341832	0.265	9.9	-0.011	0.00344329	0.24	Not in sex-specific list	No	Yes
202330_s_at	UNG	6.335	0.009	0.000127939	0.219	6.225	0.008	0.039554	0.255	6.356	0.01	0.00267565	0.25	Not in sex-specific list	No	Yes
202346_at	UBE2K	8.128	-0.008	1.58086e-05	0.267	8.138	-0.007	0.0277655	0.28	8.162	-0.009	0.000668137	0.305	Not in sex-specific list	No	Yes
202364_at	MXI1	9.436	0.01	6.99371e-07	0.334	9.313	0.009	0.00973013	0.356	9.452	0.011	2.45026e-05	0.43	Not in sex-specific list	No	Yes
202370_s_at	CBFB	6.786	0.012	0.000115407	0.222	6.795	0.009	0.0756464	0.205	6.711	0.015	0.00139946	0.277	Not in sex-specific list	No	Yes
202419_at	KDSR	6.972	0.008	0.000123482	0.22	6.97	0.006	0.0325229	0.269	6.919	0.01	0.0022024	0.259	Not in sex-specific list	No	Yes
202427_s_at	MPC2	9.733	-0.006	6.3159e-07	0.336	9.693	-0.005	0.00851611	0.365	9.796	-0.008	6.11758e-05	0.394	Not in sex-specific list	No	Yes
202453_s_at	GTF2H1	7.163	-0.007	5.8879e-05	0.237	7.158	-0.006	0.0612871	0.221	7.196	-0.008	0.00128841	0.28	Not in sex-specific list	No	Yes
202497_x_at	SLC2A3	8.251	-0.005	0.000619304	0.183	8.344	-0.005	0.0439865	0.247	8.236	-0.006	0.00643505	0.214	Not in sex-specific list	No	Yes
202500_at	DNAJB2	8.195	0.004	0.00259835	0.149	8.234	0.002	0.423108	0.064	8.121	0.007	0.00113501	0.285	Not in sex-specific list	No	Yes
202504_at	TRIM29	6.138	-0.004	0.0551405	0.071	6.067	0	0.955646	0.001	6.274	-0.009	0.00287756	0.247	Not in sex-specific list	No	Yes
202506_at	ITPRID2	7.411	0.01	1.3879e-06	0.319	7.31	0.01	0.00375827	0.42	7.43	0.011	0.00051414	0.315	Not in sex-specific list	No	Yes
202511_s_at	ATG5	8.067	-0.006	8.42182e-06	0.281	8.092	-0.006	0.00902811	0.361	8.058	-0.006	0.00337444	0.241	Not in sex-specific list	No	Yes
202524_s_at	SPOCK2	10.15	0.006	5.40221e-06	0.29	10.121	0.005	0.0211138	0.301	10.139	0.007	0.000248842	0.342	Not in sex-specific list	No	Yes
202538_s_at	CHMP2B	8.037	-0.003	0.0959574	0.057	7.93	0	0.956891	0.001	8.178	-0.007	0.00362235	0.238	Not in sex-specific list	No	Yes
202539_s_at	HMGCR	9.385	-0.011	8.42873e-06	0.281	9.422	-0.011	0.0451821	0.244	9.386	-0.012	0.000305555	0.334	Not in sex-specific list	No	Yes
202558_s_at	HSPA13	7.483	-0.015	1.96144e-07	0.36	7.396	-0.013	0.0228458	0.295	7.587	-0.018	2.47517e-05	0.429	Not in sex-specific list	No	Yes
202561_at	TNKS	8.228	0.005	0.0005539	0.185	8.155	0.004	0.0685646	0.213	8.228	0.006	0.00201629	0.262	Not in sex-specific list	No	Yes
202593_s_at	GDE1	9.611	-0.008	1.52749e-07	0.365	9.687	-0.009	0.00644426	0.384	9.563	-0.008	0.000168737	0.356	Not in sex-specific list	No	Yes
202596_at	ENSA	10.713	-0.006	0.000164879	0.214	10.786	-0.006	0.0729228	0.208	10.712	-0.008	0.00100171	0.29	Not in sex-specific list	No	Yes
202605_at	GUSB	6.423	0.006	0.000350896	0.196	6.383	0.006	0.0887307	0.193	6.419	0.007	0.00449658	0.229	Not in sex-specific list	No	Yes
202614_at	SLC30A9	9.643	-0.008	3.19357e-07	0.35	9.745	-0.008	0.00295217	0.435	9.608	-0.008	0.000209079	0.349	Not in sex-specific list	No	Yes
202619_s_at	PLOD2	5.631	0.009	0.00225418	0.152	5.648	0.007	0.148312	0.152	5.549	0.012	0.00964195	0.197	Not in sex-specific list	No	Yes
202623_at	EAPP	8.739	-0.003	0.0530381	0.073	8.608	0	0.973063	0	8.862	-0.006	0.0117654	0.189	Not in sex-specific list	No	Yes
202635_s_at	POLR2K	9.357	-0.004	0.00137146	0.164	9.31	-0.002	0.203546	0.126	9.425	-0.006	0.00362235	0.238	Not in sex-specific list	No	Yes
202640_s_at	RANBP3	7.339	0.005	2.19865e-06	0.309	7.337	0.004	0.0453258	0.244	7.305	0.007	1.7346e-05	0.44	Not in sex-specific list	No	Yes
202670_at	MAP2K1	10.407	-0.006	0.000223685	0.207	10.368	-0.005	0.160972	0.146	10.457	-0.007	0.00139899	0.277	Not in sex-specific list	No	Yes
202673_at	DPM1	8.847	-0.004	0.00193827	0.156	8.799	-0.002	0.443358	0.06	8.919	-0.006	0.000773215	0.299	Not in sex-specific list	No	Yes
202675_at	SDHB	9	-0.005	0.000183482	0.211	9.011	-0.005	0.0801253	0.201	9.015	-0.006	0.00290458	0.247	Not in sex-specific list	No	Yes
202679_at	NPC1	6.95	0.011	4.36904e-05	0.244	6.97	0.008	0.0467297	0.242	6.85	0.015	0.00046853	0.319	Not in sex-specific list	No	Yes
202697_at	NUDT21	6.873	-0.009	0.000134641	0.218	6.755	-0.006	0.180804	0.136	6.982	-0.011	0.00078497	0.299	Not in sex-specific list	No	Yes
202721_s_at	GFPT1	6.915	-0.005	0.00420278	0.137	6.812	-0.002	0.551429	0.041	7.013	-0.007	0.00242021	0.254	Not in sex-specific list	No	Yes
202723_s_at	FOXO1	5.937	0.007	0.00043801	0.191	5.995	0.006	0.221031	0.12	5.873	0.009	0.00156608	0.273	Not in sex-specific list	No	Yes
202724_s_at	FOXO1	5.687	0.01	0.000436103	0.191	5.658	0.009	0.0749423	0.206	5.671	0.011	0.00921156	0.199	Not in sex-specific list	No	Yes
202736_s_at	LSM4	9.027	-0.006	6.55411e-06	0.286	9.067	-0.006	0.0162342	0.32	9.012	-0.006	0.00152688	0.274	Not in sex-specific list	No	Yes
202742_s_at	PRKACB	11.011	-0.01	1.09042e-05	0.275	11.003	-0.008	0.0496343	0.238	11.084	-0.013	0.000126037	0.367	Not in sex-specific list	No	Yes
202770_s_at	CCNG2	8.133	-0.01	1.10109e-06	0.324	7.986	-0.007	0.0452866	0.244	8.282	-0.014	3.01383e-05	0.422	Not in sex-specific list	No	Yes
202775_s_at	SFSWAP	6.274	0.007	3.10105e-06	0.302	6.131	0.007	0.0013813	0.485	6.321	0.007	0.000565812	0.312	Not in sex-specific list	No	Yes
202780_at	OXCT1	10.4	-0.005	0.000233159	0.206	10.357	-0.003	0.157673	0.148	10.462	-0.007	0.000941113	0.292	Not in sex-specific list	No	Yes
202783_at	NNT	8.078	-0.006	9.47245e-06	0.278	8.042	-0.005	0.0265135	0.284	8.118	-0.008	0.000949212	0.292	Not in sex-specific list	No	Yes
202823_at	ELOC	8.144	-0.008	0.00049671	0.188	8.177	-0.007	0.0318149	0.27	8.173	-0.01	0.00895849	0.2	Not in sex-specific list	No	Yes
202824_s_at	ELOC	10.341	-0.005	1.12895e-06	0.323	10.345	-0.005	0.00341177	0.424	10.353	-0.006	0.000749813	0.301	Not in sex-specific list	No	Yes
202862_at	FAH	5.367	0.006	0.00215992	0.153	5.409	0.003	0.362552	0.077	5.264	0.009	0.000925006	0.293	Not in sex-specific list	No	Yes
202872_at	ATP6V1C1	9.027	-0.009	1.40858e-06	0.319	9.084	-0.009	0.00502236	0.402	9.037	-0.011	0.000301998	0.335	Not in sex-specific list	No	Yes
202873_at	ATP6V1C1	8.865	-0.016	1.45698e-06	0.318	8.861	-0.013	0.0254055	0.287	8.958	-0.019	4.71641e-05	0.403	Not in sex-specific list	No	Yes
202874_s_at	ATP6V1C1	10.162	-0.011	8.38069e-08	0.377	10.203	-0.01	0.0143299	0.328	10.186	-0.013	5.75607e-06	0.481	Not in sex-specific list	No	Yes
202887_s_at	DDIT4	6.788	0.016	8.86977e-06	0.28	6.611	0.017	0.0246125	0.29	6.839	0.017	0.000506729	0.316	Not in sex-specific list	No	Yes
202915_s_at	FAM20B	8.857	-0.006	0.00034401	0.196	8.982	-0.007	0.0217666	0.299	8.811	-0.006	0.0124286	0.186	Not in sex-specific list	No	Yes
202927_at	PIN1	10.122	-0.007	1.01705e-06	0.326	10.177	-0.007	0.00879747	0.363	10.107	-0.007	0.000320332	0.333	Not in sex-specific list	No	Yes
202928_s_at	PHF1	6.433	0.004	0.00191535	0.156	6.485	0.002	0.333013	0.085	6.368	0.005	0.00294778	0.246	Not in sex-specific list	No	Yes
202930_s_at	SUCLA2	10.395	-0.007	0.000394247	0.193	10.402	-0.005	0.0937403	0.189	10.452	-0.01	0.00201511	0.262	Not in sex-specific list	No	Yes
202949_s_at	FHL2	9.031	-0.011	1.30039e-06	0.321	9.066	-0.009	0.0203317	0.304	9.092	-0.014	1.7346e-05	0.44	Not in sex-specific list	No	Yes
202951_at	STK38	5.719	0.006	0.00827325	0.12	5.707	0.004	0.36124	0.078	5.65	0.009	0.0062209	0.216	Not in sex-specific list	No	Yes
202964_s_at	RFX5	7.474	-0.002	0.231712	0.033	7.376	0.001	0.565321	0.039	7.598	-0.005	0.0144103	0.18	Not in sex-specific list	No	Yes
202976_s_at	RHOBTB3	7.901	0.017	2.63719e-06	0.305	7.647	0.018	0.00755588	0.373	8.003	0.017	0.000647537	0.306	Not in sex-specific list	No	Yes
203000_at	STMN2	12.947	-0.005	0.00291596	0.146	12.931	-0.003	0.278027	0.101	12.99	-0.006	0.00642577	0.215	Not in sex-specific list	No	Yes
203008_x_at	TXNDC9	7.958	-0.005	0.00286536	0.146	7.924	-0.003	0.351261	0.08	8.034	-0.008	0.00248196	0.253	Not in sex-specific list	No	Yes
203015_s_at	SSX2IP	7.557	-0.014	2.5306e-07	0.354	7.446	-0.011	0.028974	0.277	7.684	-0.017	1.70472e-05	0.443	Not in sex-specific list	No	Yes
203017_s_at	SSX2IP	9.831	-0.011	2.83358e-06	0.304	9.727	-0.007	0.0436462	0.247	9.977	-0.015	3.34172e-05	0.418	Not in sex-specific list	No	Yes
203018_s_at	SSX2IP	10.153	-0.011	3.79669e-06	0.298	10.094	-0.008	0.0311334	0.272	10.272	-0.015	6.42254e-05	0.392	Not in sex-specific list	No	Yes
203032_s_at	FH	6.239	-0.01	7.42712e-05	0.232	6.176	-0.009	0.0353163	0.263	6.29	-0.011	0.00577448	0.219	Not in sex-specific list	No	Yes
203041_s_at	LAMP2	6.599	0.014	4.64722e-05	0.243	6.658	0.01	0.036212	0.261	6.481	0.018	0.00115351	0.284	Not in sex-specific list	No	Yes
203053_at	BCAS2	9.157	-0.004	0.0065583	0.126	9.132	-0.002	0.338526	0.083	9.211	-0.006	0.00936986	0.198	Not in sex-specific list	No	Yes
203068_at	KLHL21	7.497	0.005	0.000791276	0.177	7.392	0.005	0.0642122	0.218	7.513	0.006	0.00230645	0.257	Not in sex-specific list	No	Yes
203080_s_at	BAZ2B	6.449	0.012	2.38448e-05	0.258	6.353	0.012	0.00505878	0.401	6.445	0.014	0.00281104	0.248	Not in sex-specific list	No	Yes
203087_s_at	KIF2A	8.664	-0.008	1.47235e-06	0.318	8.682	-0.008	0.010481	0.351	8.66	-0.008	0.000839218	0.296	Not in sex-specific list	No	Yes
203089_s_at	HTRA2	7.877	-0.005	7.75626e-05	0.231	7.924	-0.005	0.0382901	0.257	7.868	-0.005	0.00257986	0.252	Not in sex-specific list	No	Yes
203117_s_at	PAN2	6.124	0.006	7.61481e-06	0.283	6.08	0.005	0.00876598	0.363	6.118	0.007	0.000620366	0.308	Not in sex-specific list	No	Yes
203137_at	WTAP	8.874	-0.006	3.27553e-05	0.25	8.917	-0.006	0.00779367	0.371	8.864	-0.006	0.00609429	0.217	Not in sex-specific list	No	Yes
203200_s_at	MTRR	7.122	0.006	0.000923043	0.173	7.099	0.005	0.0978676	0.185	7.092	0.008	0.0062209	0.216	Not in sex-specific list	No	Yes
203206_at	FAM53B	6.976	0.004	2.10732e-05	0.26	6.993	0.004	0.00709438	0.377	6.954	0.005	0.00374759	0.236	Not in sex-specific list	No	Yes
203211_s_at	MTMR2	8.341	-0.005	0.000367716	0.195	8.312	-0.004	0.128425	0.164	8.382	-0.006	0.00362235	0.238	Not in sex-specific list	No	Yes
203215_s_at	MYO6	6.819	0.012	2.24438e-05	0.259	6.867	0.009	0.0471315	0.241	6.72	0.016	0.000492572	0.317	Not in sex-specific list	No	Yes
203225_s_at	RFK	8.304	-0.008	3.51945e-07	0.348	8.4	-0.008	0.00244552	0.445	8.273	-0.008	0.000290011	0.337	Not in sex-specific list	No	Yes
203234_at	UPP1	5.905	0.008	5.28609e-05	0.24	5.799	0.008	0.0148435	0.326	5.93	0.009	0.00281414	0.248	Not in sex-specific list	No	Yes
203247_s_at	ZNF24	7.802	0.006	0.000278796	0.201	7.785	0.005	0.0420911	0.25	7.768	0.008	0.00313383	0.244	Not in sex-specific list	No	Yes
203255_at	FBXO11	6.455	0.009	0.00016544	0.213	6.43	0.008	0.0439865	0.247	6.439	0.01	0.00623939	0.216	Not in sex-specific list	No	Yes
203263_s_at	ARHGEF9	7.762	-0.014	1.42806e-06	0.318	7.857	-0.013	0.0315954	0.271	7.75	-0.015	3.30524e-05	0.418	Not in sex-specific list	No	Yes
203265_s_at	MAP2K4	8.867	-0.015	8.38176e-07	0.33	8.871	-0.013	0.0499864	0.237	8.928	-0.018	7.19119e-06	0.472	Not in sex-specific list	No	Yes
203291_at	CNOT4	7.44	0.003	0.0221127	0.095	7.51	0.001	0.835817	0.008	7.344	0.006	0.00244222	0.254	Not in sex-specific list	No	Yes
203302_at	DCK	8.442	-0.007	1.02903e-05	0.277	8.41	-0.006	0.0413578	0.251	8.485	-0.008	0.000516829	0.315	Not in sex-specific list	No	Yes
203351_s_at	ORC4	8.41	-0.006	0.000104466	0.224	8.456	-0.005	0.00650621	0.383	8.41	-0.006	0.00737324	0.208	Not in sex-specific list	No	Yes
203352_at	ORC4	6.961	-0.008	2.035e-06	0.311	7.033	-0.008	0.00460583	0.407	6.924	-0.007	0.00222933	0.258	Not in sex-specific list	No	Yes
203375_s_at	TPP2	6.621	0.006	0.00293129	0.146	6.616	0.004	0.265316	0.104	6.577	0.007	0.00481395	0.226	Not in sex-specific list	No	Yes
203390_s_at	KIF3C	10.269	-0.011	7.05936e-07	0.334	10.293	-0.009	0.0139127	0.33	10.325	-0.013	2.58834e-05	0.427	Not in sex-specific list	No	Yes
203401_at	PRPS2	8.468	-0.008	0.000135301	0.218	8.432	-0.006	0.0552656	0.23	8.541	-0.01	0.00187196	0.265	Not in sex-specific list	No	Yes
203405_at	PSMG1	7.914	-0.004	0.0363242	0.083	7.795	-0.001	0.880686	0.004	8.058	-0.008	0.00722987	0.209	Not in sex-specific list	No	Yes
203415_at	PDCD6	9.433	-0.004	5.21566e-05	0.24	9.454	-0.004	0.0336123	0.266	9.438	-0.005	0.00240389	0.255	Not in sex-specific list	No	Yes
203430_at	HEBP2	6.551	0.011	2.4999e-06	0.307	6.435	0.012	0.0108548	0.348	6.606	0.011	0.000877016	0.295	Not in sex-specific list	No	Yes
203482_at	SLF2	6.589	0.007	0.00389982	0.139	6.643	0.004	0.40836	0.067	6.47	0.011	0.00210515	0.261	Not in sex-specific list	No	Yes
203511_s_at	TRAPPC3	8.182	-0.005	0.000722022	0.179	8.156	-0.004	0.166107	0.143	8.23	-0.007	0.00361042	0.238	Not in sex-specific list	No	Yes
203520_s_at	ZNF318	6.318	-0.004	0.000607181	0.183	6.325	-0.004	0.115677	0.172	6.331	-0.005	0.00651885	0.214	Not in sex-specific list	No	Yes
203556_at	ZHX2	6.795	0.009	0.000280627	0.201	6.88	0.006	0.169754	0.141	6.684	0.012	0.00128205	0.28	Not in sex-specific list	No	Yes
203560_at	GGH	7.394	-0.006	0.00217178	0.153	7.449	-0.005	0.0582174	0.226	7.428	-0.009	0.00850108	0.202	Not in sex-specific list	No	Yes
203594_at	RTCA	8.763	-0.008	5.85867e-06	0.289	8.861	-0.008	0.0193609	0.308	8.732	-0.008	0.000334903	0.331	Not in sex-specific list	No	Yes
203600_s_at	FAM193A	6.856	0.005	7.97119e-05	0.23	6.848	0.005	0.0641961	0.218	6.829	0.007	0.0011666	0.284	Not in sex-specific list	No	Yes
203620_s_at	FCHSD2	7.064	0.006	0.000114964	0.222	6.97	0.006	0.0206391	0.303	7.071	0.008	0.0016	0.272	Not in sex-specific list	No	Yes
203622_s_at	PNO1	7.415	-0.006	0.00011493	0.222	7.357	-0.004	0.100207	0.183	7.477	-0.007	0.00167893	0.27	Not in sex-specific list	No	Yes
203631_s_at	GPRC5B	6.702	0.007	0.00182526	0.157	6.772	0.004	0.263178	0.105	6.582	0.011	0.00270293	0.25	Not in sex-specific list	No	Yes
203632_s_at	GPRC5B	10.065	0.012	0.000361245	0.195	10.056	0.01	0.0899472	0.192	9.986	0.016	0.00286553	0.247	Not in sex-specific list	No	Yes
203633_at	CPT1A	7.144	0.006	0.00161193	0.16	7.214	0.004	0.326556	0.087	7.081	0.007	0.00302769	0.245	Not in sex-specific list	No	Yes
203663_s_at	COX5A	11.552	-0.006	1.9914e-05	0.262	11.609	-0.006	0.0265659	0.284	11.533	-0.006	0.00157759	0.272	Not in sex-specific list	No	Yes
203674_at	HELZ	7.637	0.005	0.00189152	0.156	7.635	0.003	0.237205	0.114	7.596	0.006	0.00319945	0.243	Not in sex-specific list	No	Yes
203683_s_at	VEGFB	6.192	0.005	0.0177771	0.101	6.357	0.001	0.923267	0.002	6.025	0.009	0.00176964	0.267	Not in sex-specific list	No	Yes
203685_at	BCL2	6.516	0.011	4.94913e-06	0.292	6.499	0.009	0.0130326	0.335	6.481	0.012	0.000605721	0.309	Not in sex-specific list	No	Yes
203739_at	ZNF217	3.676	0.009	0.000121565	0.221	3.616	0.008	0.0573048	0.227	3.662	0.011	0.00189065	0.265	Not in sex-specific list	No	Yes
203759_at	ST3GAL4	5.963	0.003	0.0393533	0.08	5.993	0.001	0.795984	0.011	5.886	0.006	0.00434774	0.23	Not in sex-specific list	No	Yes
203767_s_at	STS	8.099	-0.011	0.000111242	0.223	8.322	-0.01	0.0435822	0.247	8.079	-0.015	0.000161407	0.358	Not in sex-specific list	No	Yes
203768_s_at	STS	7.336	-0.009	0.000228805	0.206	7.485	-0.008	0.020298	0.304	7.322	-0.011	0.00230156	0.257	Not in sex-specific list	No	Yes
203794_at	CDC42BPA	8.266	0.005	6.74795e-06	0.286	8.253	0.005	0.00562725	0.393	8.25	0.006	0.00110649	0.286	Not in sex-specific list	No	Yes
203864_s_at	ACTN2	7.233	-0.004	0.02306	0.094	7.129	0	0.924775	0.002	7.361	-0.007	0.00202994	0.262	Not in sex-specific list	No	Yes
203869_at	USP46	8.463	-0.007	3.56363e-05	0.249	8.442	-0.006	0.0501838	0.237	8.492	-0.008	0.00181959	0.266	Not in sex-specific list	No	Yes
203889_at	SCG5	12.341	-0.005	0.00180395	0.157	12.347	-0.003	0.175006	0.139	12.377	-0.006	0.00517337	0.223	Not in sex-specific list	No	Yes
203890_s_at	DAPK3	6.895	-0.009	1.61263e-05	0.267	6.985	-0.009	0.034122	0.265	6.873	-0.01	0.0006082	0.309	Not in sex-specific list	No	Yes
203946_s_at	ARG2	7.535	-0.014	1.47481e-06	0.317	7.697	-0.016	0.00728282	0.375	7.433	-0.013	0.00140194	0.277	Not in sex-specific list	No	Yes
203961_at	NEBL	9.986	0.01	4.7425e-07	0.342	9.983	0.008	0.0419538	0.25	9.931	0.013	4.16629e-06	0.498	Not in sex-specific list	No	Yes
204020_at	PURA	10.236	0.007	2.09543e-05	0.261	10.178	0.006	0.00704548	0.378	10.233	0.008	0.00180016	0.267	Not in sex-specific list	No	Yes
204021_s_at	PURA	7.686	0.01	8.83358e-06	0.28	7.672	0.009	0.0164215	0.319	7.657	0.012	0.00105017	0.288	Not in sex-specific list	No	Yes
204045_at	TCEAL1	9.096	-0.002	0.0832199	0.061	9.019	0.001	0.832846	0.008	9.207	-0.006	0.00255394	0.252	Not in sex-specific list	No	Yes
204068_at	STK3	4.452	0.009	0.000180781	0.211	4.339	0.009	0.0316531	0.271	4.467	0.01	0.00400617	0.234	Not in sex-specific list	No	Yes
204097_s_at	RBMX2	6.125	0.005	0.00153006	0.161	6.105	0.004	0.251678	0.109	6.088	0.007	0.00121135	0.282	Not in sex-specific list	No	Yes
204114_at	NID2	4.303	-0.002	0.115464	0.052	4.2	0.001	0.861754	0.006	4.426	-0.006	0.00452108	0.229	Not in sex-specific list	No	Yes
204127_at	RFC3	6.756	-0.008	7.53946e-06	0.283	6.725	-0.006	0.0241675	0.291	6.824	-0.01	0.000246247	0.342	Not in sex-specific list	No	Yes
204163_at	EMILIN1	4.904	0.003	0.134039	0.048	5.024	-0.001	0.724127	0.019	4.75	0.007	0.00375394	0.236	Not in sex-specific list	No	Yes
204185_x_at	PPID	9.61	-0.008	0.000847442	0.175	9.756	-0.009	0.0184859	0.311	9.542	-0.007	0.0410202	0.132	Not in sex-specific list	No	Yes
204186_s_at	PPID	8.729	-0.012	2.93998e-05	0.253	8.996	-0.015	0.00557689	0.394	8.569	-0.01	0.0153497	0.177	Not in sex-specific list	No	Yes
204187_at	GMPR	5.108	0.013	2.60417e-06	0.306	4.882	0.015	0.00318224	0.429	5.216	0.012	0.00189065	0.265	Not in sex-specific list	No	Yes
204230_s_at	SLC17A7	10.813	-0.007	0.00180603	0.157	10.849	-0.006	0.259899	0.106	10.858	-0.01	0.00168999	0.269	Not in sex-specific list	No	Yes
204246_s_at	DCTN3	10.48	-0.006	2.66938e-05	0.255	10.47	-0.005	0.0420873	0.25	10.523	-0.008	0.000602485	0.309	Not in sex-specific list	No	Yes
204260_at	CHGB	10.92	-0.01	0.000184056	0.211	11.008	-0.009	0.076846	0.204	10.926	-0.012	0.00167195	0.27	Not in sex-specific list	No	Yes
204326_x_at	MT1X	8.79	0.018	0.000627881	0.182	8.611	0.019	0.0667381	0.215	8.869	0.018	0.0175551	0.171	Not in sex-specific list	No	Yes
204338_s_at	RGS4	12.281	-0.032	2.06824e-08	0.408	12.313	-0.027	0.0112196	0.346	12.423	-0.038	1.58214e-06	0.531	Not in sex-specific list	No	Yes
204339_s_at	RGS4	12.053	-0.018	1.19604e-06	0.322	12.066	-0.014	0.0170435	0.317	12.164	-0.023	3.94178e-05	0.411	Not in sex-specific list	No	Yes
204345_at	COL16A1	6.888	0.005	0.00885157	0.119	6.907	0.003	0.45303	0.058	6.822	0.007	0.0049219	0.225	Not in sex-specific list	No	Yes
204378_at	BCAS1	7.182	0.009	0.00256265	0.149	7.167	0.006	0.308737	0.091	7.085	0.014	0.00154936	0.273	Not in sex-specific list	No	Yes
204417_at	GALC	7.912	0.007	1.98916e-05	0.262	7.825	0.006	0.0435396	0.247	7.929	0.007	0.000152937	0.36	Not in sex-specific list	No	Yes
204426_at	TMED2	8.173	-0.008	0.000286388	0.201	8.15	-0.006	0.106512	0.178	8.235	-0.01	0.00237519	0.255	Not in sex-specific list	No	Yes
204466_s_at	SNCA	12.049	-0.008	8.9085e-05	0.228	12.097	-0.007	0.0515522	0.234	12.068	-0.01	0.00147033	0.275	Not in sex-specific list	No	Yes
204472_at	GEM	5.11	0.01	0.00736645	0.123	5.263	0.004	0.478845	0.053	4.912	0.015	0.00620995	0.216	Not in sex-specific list	No	Yes
204478_s_at	RABIF	7.805	-0.005	0.00113715	0.168	7.791	-0.003	0.198707	0.128	7.867	-0.007	0.00134807	0.278	Not in sex-specific list	No	Yes
204511_at	FARP2	6.157	0.003	0.00579688	0.129	6.187	0.002	0.470781	0.055	6.101	0.005	0.00287227	0.247	Not in sex-specific list	No	Yes
204519_s_at	PLLP	8.41	0.011	0.000798635	0.177	8.432	0.008	0.145639	0.154	8.318	0.014	0.00378602	0.236	Not in sex-specific list	No	Yes
204525_at	PHF14	5.305	-0.008	0.000367261	0.195	5.286	-0.007	0.0968944	0.186	5.342	-0.009	0.00645021	0.214	Not in sex-specific list	No	Yes
204560_at	FKBP5	4.425	0.015	1.89698e-05	0.263	4.23	0.017	0.0124889	0.338	4.515	0.015	0.00397143	0.234	Not in sex-specific list	No	Yes
204630_s_at	GOSR1	7.973	0.007	0.0017243	0.158	7.935	0.005	0.102034	0.182	7.943	0.008	0.00904529	0.2	Not in sex-specific list	No	Yes
204641_at	NEK2	5.814	-0.01	2.30017e-05	0.259	5.889	-0.01	0.00925809	0.359	5.796	-0.011	0.00438602	0.23	Not in sex-specific list	No	Yes
204675_at	SRD5A1	8.086	-0.012	2.05293e-07	0.359	8.278	-0.014	0.000221411	0.578	7.979	-0.01	0.00230243	0.257	Not in sex-specific list	No	Yes
204678_s_at	KCNK1	9.886	-0.015	5.25924e-07	0.34	10.022	-0.015	0.00876195	0.363	9.875	-0.017	5.88465e-05	0.395	Not in sex-specific list	No	Yes
204679_at	KCNK1	10.39	-0.009	4.98321e-05	0.241	10.473	-0.008	0.0112595	0.346	10.404	-0.011	0.00158263	0.272	Not in sex-specific list	No	Yes
204729_s_at	STX1A	9.921	-0.006	0.00631683	0.127	9.938	-0.004	0.281295	0.1	9.971	-0.009	0.00966893	0.197	Not in sex-specific list	No	Yes
204736_s_at	CSPG4	4.704	0.004	0.0575345	0.07	4.725	0.001	0.819276	0.009	4.611	0.007	0.00819849	0.204	Not in sex-specific list	No	Yes
204755_x_at	HLF	9.966	-0.012	1.01534e-06	0.326	9.88	-0.009	0.0245443	0.29	10.095	-0.016	3.87679e-05	0.412	Not in sex-specific list	No	Yes
204796_at	EML1	6.431	-0.007	5.47833e-05	0.239	6.478	-0.007	0.0528824	0.233	6.413	-0.007	0.00211311	0.26	Not in sex-specific list	No	Yes
204906_at	RPS6KA2	8.045	0.006	6.00298e-05	0.237	7.999	0.006	0.00502236	0.402	8.044	0.007	0.0062209	0.216	Not in sex-specific list	No	Yes
204943_at	ADAM12	5.621	-0.003	0.0516055	0.073	5.539	0	0.928423	0.002	5.735	-0.007	0.00987048	0.196	Not in sex-specific list	No	Yes
204945_at	PTPRN	8.653	-0.007	0.000405667	0.192	8.692	-0.007	0.0976324	0.186	8.658	-0.008	0.00491972	0.225	Not in sex-specific list	No	Yes
204990_s_at	ITGB4	6.116	0.011	1.50074e-07	0.365	6.002	0.011	0.00515707	0.4	6.16	0.011	9.54756e-05	0.377	Not in sex-specific list	No	Yes
204995_at	CDK5R1	10.671	-0.005	0.000271933	0.202	10.634	-0.003	0.0525296	0.233	10.726	-0.006	0.00340562	0.24	Not in sex-specific list	No	Yes
205031_at	EFNB3	9.325	-0.009	1.38214e-06	0.319	9.316	-0.007	0.0141008	0.329	9.395	-0.012	4.50823e-05	0.406	Not in sex-specific list	No	Yes
205074_at	SLC22A5	5.448	0.005	0.00337712	0.142	5.543	0.003	0.40447	0.068	5.341	0.008	0.0044268	0.23	Not in sex-specific list	No	Yes
205084_at	BCAP29	7.801	-0.009	6.06486e-05	0.236	7.727	-0.007	0.0909885	0.191	7.876	-0.011	0.00120552	0.282	Not in sex-specific list	No	Yes
205104_at	SNPH	8.67	0.005	0.000915476	0.173	8.576	0.005	0.0527012	0.233	8.7	0.005	0.011554	0.189	Not in sex-specific list	No	Yes
205111_s_at	PLCE1	5.234	0.005	0.0252774	0.092	5.361	0.001	0.905156	0.003	5.067	0.01	0.00220884	0.259	Not in sex-specific list	No	Yes
205148_s_at	CLCN4	8.066	-0.009	1.77731e-06	0.313	8.147	-0.009	0.0113962	0.344	8.04	-0.009	0.000409585	0.324	Not in sex-specific list	No	Yes
205149_s_at	CLCN4	8.205	-0.011	9.54053e-06	0.278	8.218	-0.01	0.0299609	0.274	8.237	-0.013	0.000585877	0.31	Not in sex-specific list	No	Yes
205178_s_at	RBBP6	6.488	0.005	0.0102071	0.115	6.547	0.002	0.647831	0.028	6.38	0.008	0.0017075	0.269	Not in sex-specific list	No	Yes
205202_at	PCMT1	11.204	-0.008	7.97875e-07	0.331	11.233	-0.006	0.00869687	0.364	11.24	-0.01	3.62887e-05	0.414	Not in sex-specific list	No	Yes
205218_at	POLR3F	6.288	-0.005	0.00108844	0.169	6.194	-0.002	0.436621	0.061	6.385	-0.007	0.000780896	0.299	Not in sex-specific list	No	Yes
205249_at	EGR2	5.943	-0.009	0.00018375	0.211	5.994	-0.009	0.110121	0.176	5.941	-0.01	0.00150762	0.274	Not in sex-specific list	No	Yes
205268_s_at	ADD2	8.056	-0.009	1.24049e-05	0.272	8.068	-0.007	0.0494078	0.238	8.132	-0.013	4.31096e-05	0.408	Not in sex-specific list	No	Yes
205280_at	GLRB	9.996	-0.009	0.00663773	0.126	9.928	-0.005	0.283597	0.099	10.117	-0.012	0.013245	0.184	Not in sex-specific list	No	Yes
205281_s_at	PIGA	5.141	0.006	0.00524037	0.132	5.178	0.004	0.298058	0.095	5.066	0.008	0.009824	0.196	Not in sex-specific list	No	Yes
205352_at	SERPINI1	12.595	-0.006	9.34694e-06	0.279	12.595	-0.005	0.0283039	0.279	12.647	-0.009	9.34154e-05	0.378	Not in sex-specific list	No	Yes
205383_s_at	ZBTB20	7.877	0.011	0.000163767	0.214	7.854	0.01	0.0245832	0.29	7.858	0.012	0.00985747	0.196	Not in sex-specific list	No	Yes
205406_s_at	SPA17	7.041	-0.004	0.0269473	0.09	7.085	-0.003	0.298229	0.095	7.074	-0.006	0.0299714	0.147	Not in sex-specific list	No	Yes
205489_at	CRYM	11.114	-0.008	2.88731e-05	0.253	11.173	-0.007	0.0189633	0.309	11.149	-0.011	0.000331498	0.332	Not in sex-specific list	No	Yes
205513_at	TCN1	4.899	-0.003	0.0429761	0.078	4.842	-0.001	0.866133	0.006	4.991	-0.006	0.00683348	0.212	Not in sex-specific list	No	Yes
205632_s_at	PIP5K1B	9.166	-0.009	1.43554e-06	0.318	9.353	-0.01	0.00386123	0.418	9.094	-0.01	0.000279086	0.338	Not in sex-specific list	No	Yes
205635_at	KALRN	10.193	-0.009	6.13067e-06	0.288	10.228	-0.008	0.0104326	0.352	10.226	-0.011	0.000391507	0.326	Not in sex-specific list	No	Yes
205749_at	CYP1A1	5.359	-0.003	0.132831	0.048	5.227	0.001	0.661285	0.026	5.518	-0.007	0.00191057	0.264	Not in sex-specific list	No	Yes
205760_s_at	OGG1	6.137	0.004	0.00923887	0.118	6.308	0.001	0.710973	0.02	6.018	0.006	0.00645021	0.214	Not in sex-specific list	No	Yes
205806_at	ROM1	5.878	0.004	0.0100435	0.116	5.822	0.003	0.370842	0.075	5.852	0.006	0.00252111	0.253	Not in sex-specific list	No	Yes
205827_at	CCK	12.346	-0.01	1.77731e-06	0.313	12.415	-0.009	0.0229004	0.295	12.344	-0.011	8.66976e-05	0.381	Not in sex-specific list	No	Yes
205850_s_at	GABRB3	8.162	-0.016	2.08171e-05	0.261	8.283	-0.016	0.0392322	0.255	8.155	-0.018	0.000618344	0.308	Not in sex-specific list	No	Yes
205854_at	TULP3	6.276	0.006	0.000294212	0.2	6.278	0.005	0.0580005	0.226	6.251	0.007	0.00683348	0.212	Not in sex-specific list	No	Yes
205882_x_at	ADD3	9.366	0.012	5.67492e-06	0.289	9.286	0.011	0.0164215	0.319	9.369	0.013	0.000602343	0.309	Not in sex-specific list	No	Yes
205883_at	ZBTB16	8.522	0.009	2.49187e-06	0.307	8.429	0.01	0.00323592	0.427	8.571	0.009	0.00309124	0.244	Not in sex-specific list	No	Yes
205899_at	CCNA1	7.058	-0.008	1.1542e-05	0.274	7.101	-0.007	0.0105508	0.35	7.07	-0.009	0.0011709	0.284	Not in sex-specific list	No	Yes
206062_at	GUCA1A	6.293	-0.006	0.000510518	0.187	6.412	-0.006	0.0778551	0.203	6.271	-0.007	0.00160882	0.271	Not in sex-specific list	No	Yes
206072_at	UCN	5.889	0.003	0.0474602	0.075	5.97	0	0.900626	0.003	5.788	0.006	0.00872148	0.201	Not in sex-specific list	No	Yes
206075_s_at	CSNK2A1	7.772	-0.006	1.71515e-07	0.362	7.776	-0.006	0.0158475	0.322	7.785	-0.007	3.40533e-05	0.417	Not in sex-specific list	No	Yes
206089_at	NELL1	9.481	-0.008	0.000238708	0.205	9.463	-0.007	0.08154	0.199	9.528	-0.01	0.00407666	0.233	Not in sex-specific list	No	Yes
206113_s_at	RAB5A	8.507	-0.006	0.000440376	0.19	8.377	-0.003	0.257208	0.107	8.624	-0.009	0.00162027	0.271	Not in sex-specific list	No	Yes
206115_at	EGR3	9.939	-0.014	8.3061e-07	0.33	10.13	-0.014	0.00458146	0.408	9.893	-0.015	0.000126302	0.367	Not in sex-specific list	No	Yes
206191_at	ENTPD3	8.437	-0.006	0.00770023	0.122	8.357	-0.002	0.576914	0.038	8.562	-0.009	0.0025085	0.253	Not in sex-specific list	No	Yes
206238_s_at	YAF2	6.813	-0.004	0.00473563	0.134	6.737	-0.002	0.466546	0.056	6.901	-0.007	0.00440515	0.23	Not in sex-specific list	No	Yes
206290_s_at	RGS7	10.533	-0.006	3.3165e-06	0.3	10.565	-0.005	0.0164215	0.319	10.552	-0.007	0.00012033	0.369	Not in sex-specific list	No	Yes
206356_s_at	GNAL	6.647	-0.012	1.55198e-05	0.268	6.889	-0.014	0.00663702	0.381	6.531	-0.012	0.00410709	0.233	Not in sex-specific list	No	Yes
206461_x_at	MT1H	8.377	0.012	0.000933579	0.173	8.406	0.011	0.188987	0.133	8.332	0.013	0.00562949	0.22	Not in sex-specific list	No	Yes
206471_s_at	PLXNC1	5.57	-0.007	0.000255806	0.203	5.679	-0.007	0.050076	0.237	5.546	-0.007	0.00285744	0.247	Not in sex-specific list	No	Yes
206474_at	CDK17	6.995	-0.013	8.23442e-08	0.377	6.977	-0.011	0.0182117	0.312	7.065	-0.015	5.75607e-06	0.48	Not in sex-specific list	No	Yes
206670_s_at	GAD1	7.917	-0.018	9.47245e-06	0.278	8.041	-0.016	0.041121	0.252	7.941	-0.021	0.000121797	0.368	Not in sex-specific list	No	Yes
206686_at	PDK1	5.807	-0.004	0.00801265	0.121	5.857	-0.003	0.35528	0.079	5.838	-0.006	0.00231013	0.256	Not in sex-specific list	No	Yes
206695_x_at	ZNF43	6.263	-0.003	0.0587836	0.07	6.175	-0.001	0.897373	0.004	6.369	-0.006	0.0130435	0.184	Not in sex-specific list	No	Yes
206731_at	CNKSR2	9.055	-0.011	3.25801e-07	0.349	9.099	-0.01	0.00225296	0.45	9.074	-0.013	0.000222337	0.347	Not in sex-specific list	No	Yes
206745_at	HOXC11	5.995	-0.002	0.36478	0.021	5.904	0.002	0.430449	0.063	6.126	-0.006	0.0298786	0.147	Not in sex-specific list	No	Yes
206782_s_at	DNAJC4	6.265	0.003	0.0656974	0.067	6.358	0	0.994073	0	6.155	0.006	0.00400267	0.234	Not in sex-specific list	No	Yes
206811_at	ADCY8	6.15	0.003	0.099118	0.056	6.298	-0.001	0.733137	0.018	5.997	0.006	0.00165172	0.27	Not in sex-specific list	No	Yes
206855_s_at	HYAL2	6.963	0.005	0.000381526	0.194	6.95	0.004	0.120242	0.169	6.933	0.006	0.00142677	0.276	Not in sex-specific list	No	Yes
206861_s_at	CGGBP1	7.429	-0.006	0.000240997	0.205	7.478	-0.006	0.0901821	0.192	7.432	-0.007	0.00195298	0.263	Not in sex-specific list	No	Yes
206898_at	CDH19	4.989	0.013	8.75759e-05	0.228	4.997	0.01	0.0428643	0.248	4.879	0.018	0.000939865	0.292	Not in sex-specific list	No	Yes
206900_x_at	ZNF253	5.909	-0.004	0.00173169	0.158	5.937	-0.003	0.113184	0.174	5.927	-0.006	0.00776976	0.206	Not in sex-specific list	No	Yes
206935_at	PCDH8	9.896	-0.013	0.000356558	0.195	10.079	-0.012	0.058999	0.224	9.874	-0.015	0.00317799	0.243	Not in sex-specific list	No	Yes
206949_s_at	RUSC1	9.615	-0.005	0.00048618	0.188	9.574	-0.004	0.0616934	0.221	9.666	-0.006	0.00754819	0.207	Not in sex-specific list	No	Yes
206984_s_at	RIT2	9.18	-0.01	0.000830646	0.176	9.181	-0.009	0.0857748	0.195	9.228	-0.012	0.0107497	0.193	Not in sex-specific list	No	Yes
206989_s_at	SCAF11	5.735	0.007	0.00293057	0.146	5.757	0.005	0.264053	0.105	5.654	0.01	0.00492997	0.225	Not in sex-specific list	No	Yes
207081_s_at	PI4KA	10.793	-0.008	7.31209e-07	0.333	10.771	-0.007	0.0178356	0.314	10.844	-0.01	7.00519e-05	0.389	Not in sex-specific list	No	Yes
207103_at	KCND2	8.486	-0.009	0.000329305	0.197	8.634	-0.009	0.0181227	0.313	8.467	-0.011	0.00542141	0.221	Not in sex-specific list	No	Yes
207124_s_at	GNB5	8.879	-0.012	7.02781e-07	0.334	8.942	-0.012	0.0175022	0.315	8.881	-0.013	6.82127e-05	0.39	Not in sex-specific list	No	Yes
207142_at	KCNJ3	6.877	-0.012	3.1285e-06	0.302	6.924	-0.012	0.0264235	0.284	6.887	-0.014	0.000234587	0.344	Not in sex-specific list	No	Yes
207152_at	NTRK2	7.416	-0.009	0.00120593	0.167	7.422	-0.006	0.209727	0.124	7.497	-0.012	0.001887	0.265	Not in sex-specific list	No	Yes
207318_s_at	CDK13	7.411	0.005	0.00154993	0.161	7.476	0.003	0.393377	0.071	7.325	0.008	0.00112667	0.285	Not in sex-specific list	No	Yes
207405_s_at	RAD17	6.857	-0.003	0.0638681	0.068	6.754	-0.001	0.854269	0.006	6.957	-0.006	0.0222151	0.16	Not in sex-specific list	No	Yes
207431_s_at	DEGS1	8.212	-0.006	0.000110969	0.223	8.188	-0.005	0.0931619	0.189	8.242	-0.007	0.00220233	0.259	Not in sex-specific list	No	Yes
207508_at	ATP5MC3	10.879	-0.005	0.00115347	0.168	10.841	-0.003	0.258577	0.106	10.946	-0.007	0.00186644	0.265	Not in sex-specific list	No	Yes
207527_at	KCNJ9	8.014	-0.012	1.32163e-07	0.368	8.114	-0.012	0.00528599	0.397	8.006	-0.014	3.30668e-05	0.418	Not in sex-specific list	No	Yes
207547_s_at	FAM107A	9.872	0.015	6.34154e-07	0.336	9.748	0.015	0.0157655	0.322	9.876	0.018	3.34972e-05	0.417	Not in sex-specific list	No	Yes
207627_s_at	TFCP2	7.25	-0.007	4.43814e-05	0.244	7.306	-0.007	0.0367293	0.26	7.227	-0.007	0.00282916	0.248	Not in sex-specific list	No	Yes
207654_x_at	DR1	6.582	-0.006	6.95246e-05	0.233	6.543	-0.006	0.089136	0.192	6.617	-0.007	0.00170712	0.269	Not in sex-specific list	No	Yes
207657_x_at	TNPO1	8.427	0.007	0.00101294	0.171	8.444	0.006	0.102735	0.181	8.378	0.009	0.00966035	0.197	Not in sex-specific list	No	Yes
207721_x_at	HINT1	11.462	-0.004	0.00332846	0.143	11.374	-0.002	0.480121	0.053	11.552	-0.006	0.00322274	0.243	Not in sex-specific list	No	Yes
207738_s_at	NCKAP1	9.612	-0.005	0.00895553	0.118	9.49	-0.001	0.691954	0.022	9.773	-0.01	0.00230002	0.257	Not in sex-specific list	No	Yes
207760_s_at	NCOR2	8.968	0.005	0.000818398	0.176	9.033	0.003	0.293874	0.096	8.9	0.006	0.00186264	0.266	Not in sex-specific list	No	Yes
207776_s_at	CACNB2	9.129	-0.011	7.78534e-07	0.331	9.024	-0.007	0.0232958	0.294	9.268	-0.015	2.56964e-05	0.427	Not in sex-specific list	No	Yes
207781_s_at	ZNF711	6.176	-0.012	1.15368e-05	0.274	6.13	-0.011	0.0469103	0.242	6.24	-0.014	0.000542346	0.313	Not in sex-specific list	No	Yes
207791_s_at	RAB1A	9.596	-0.011	2.90539e-08	0.401	9.564	-0.009	0.00732403	0.375	9.672	-0.013	5.07767e-06	0.487	Not in sex-specific list	No	Yes
207880_at	ADAM11	6.985	-0.004	0.00853845	0.12	6.926	-0.002	0.644778	0.028	7.079	-0.007	0.00127577	0.28	Not in sex-specific list	No	Yes
207940_x_at	CNR1	5.634	-0.005	0.0025775	0.149	5.629	-0.003	0.345	0.082	5.695	-0.007	0.00103196	0.289	Not in sex-specific list	No	Yes
207966_s_at	GLG1	8.863	0.006	0.00193608	0.156	8.878	0.004	0.15953	0.147	8.82	0.007	0.0114543	0.19	Not in sex-specific list	No	Yes
207996_s_at	LDLRAD4	8.518	-0.009	3.27824e-06	0.301	8.681	-0.01	0.00426885	0.412	8.45	-0.009	0.00111099	0.286	Not in sex-specific list	No	Yes
208013_s_at	ACRV1	4.904	-0.003	0.0178493	0.101	4.834	-0.001	0.83251	0.008	4.993	-0.005	0.00281958	0.248	Not in sex-specific list	No	Yes
208092_s_at	CYRIA	8.787	-0.016	3.49558e-09	0.442	8.792	-0.014	0.00732312	0.375	8.854	-0.019	1.01343e-06	0.557	Not in sex-specific list	No	Yes
208104_s_at	TSC22D4	7.493	0.007	2.93312e-05	0.253	7.468	0.006	0.041075	0.252	7.452	0.009	0.000240453	0.343	Not in sex-specific list	No	Yes
208121_s_at	PTPRO	7.9	-0.011	4.69423e-08	0.391	8.044	-0.012	0.00359424	0.422	7.847	-0.012	2.49352e-05	0.429	Not in sex-specific list	No	Yes
208124_s_at	SEMA4F	6.634	-0.006	2.77769e-05	0.254	6.646	-0.005	0.038399	0.257	6.659	-0.007	0.000694828	0.304	Not in sex-specific list	No	Yes
208213_s_at	KCNAB1	7.682	-0.008	0.000608909	0.183	7.726	-0.007	0.117094	0.171	7.717	-0.011	0.00286956	0.247	Not in sex-specific list	No	Yes
208243_s_at	CNR1	5.367	-0.007	1.07495e-06	0.324	5.417	-0.007	0.0151102	0.325	5.356	-0.008	0.000175535	0.355	Not in sex-specific list	No	Yes
208290_s_at	EIF5	9.067	-0.012	3.51334e-07	0.348	9.193	-0.013	0.0070933	0.377	8.999	-0.011	0.000250916	0.342	Not in sex-specific list	No	Yes
208351_s_at	MAPK1	7.954	-0.013	2.40795e-07	0.356	7.901	-0.011	0.0265659	0.284	8.038	-0.015	1.54124e-05	0.445	Not in sex-specific list	No	Yes
208424_s_at	CIAPIN1	7.73	-0.008	2.52023e-07	0.354	7.843	-0.009	0.00234711	0.447	7.661	-0.007	0.000894617	0.294	Not in sex-specific list	No	Yes
208425_s_at	TANC2	6.691	-0.01	0.000171031	0.213	6.709	-0.009	0.132796	0.161	6.719	-0.012	0.000902846	0.293	Not in sex-specific list	No	Yes
208447_s_at	PRPS1	7.712	-0.013	8.83358e-06	0.28	7.806	-0.013	0.0288118	0.277	7.697	-0.014	0.000477997	0.318	Not in sex-specific list	No	Yes
208461_at	HIC1	4.232	0.003	0.0483688	0.075	4.319	0	0.956317	0.001	4.107	0.007	0.00348814	0.239	Not in sex-specific list	No	Yes
208463_at	GABRA4	6.857	-0.006	0.000142342	0.217	6.922	-0.006	0.0286931	0.278	6.855	-0.007	0.00334921	0.241	Not in sex-specific list	No	Yes
208524_at	GPR15	5.313	-0.002	0.0991437	0.056	5.22	0.001	0.75633	0.015	5.433	-0.006	0.0039221	0.234	Not in sex-specific list	No	Yes
208532_x_at	KRTAP5-8	7.059	-0.002	0.307625	0.025	6.867	0.003	0.275444	0.101	7.25	-0.007	0.0118985	0.188	Not in sex-specific list	No	Yes
208581_x_at	MT1X	9.584	0.015	0.000609653	0.183	9.533	0.014	0.11525	0.172	9.578	0.016	0.00797619	0.205	Not in sex-specific list	No	Yes
208669_s_at	EID1	10.477	-0.003	0.0358047	0.083	10.434	-0.001	0.704261	0.021	10.55	-0.005	0.0136479	0.182	Not in sex-specific list	No	Yes
208687_x_at	HSPA8	12.896	-0.008	2.97959e-07	0.351	12.951	-0.009	0.0070933	0.377	12.876	-0.009	0.00021354	0.348	Not in sex-specific list	No	Yes
208708_x_at	EIF5	9.709	-0.008	6.03516e-07	0.337	9.8	-0.009	0.00352802	0.423	9.657	-0.008	0.00117175	0.284	Not in sex-specific list	No	Yes
208724_s_at	RAB1A	11.533	-0.004	6.44869e-07	0.336	11.559	-0.004	0.00551267	0.395	11.533	-0.005	0.000238802	0.344	Not in sex-specific list	No	Yes
208748_s_at	FLOT1	7.696	-0.008	9.53683e-05	0.226	7.698	-0.007	0.0752469	0.206	7.735	-0.01	0.00145905	0.276	Not in sex-specific list	No	Yes
208767_s_at	LAPTM4B	9.021	-0.005	0.00411224	0.138	9.016	-0.003	0.280499	0.1	9.084	-0.008	0.00484627	0.226	Not in sex-specific list	No	Yes
208781_x_at	SNX3	10.775	-0.007	7.05617e-09	0.428	10.851	-0.007	0.000297911	0.561	10.739	-0.007	0.000118918	0.369	Not in sex-specific list	No	Yes
208821_at	SNRPB	7.32	-0.004	0.01352	0.108	7.174	-0.001	0.882945	0.004	7.46	-0.007	0.00146486	0.275	Not in sex-specific list	No	Yes
208826_x_at	HINT1	11.407	-0.004	0.00179912	0.157	11.305	-0.001	0.549325	0.042	11.511	-0.007	0.00088149	0.294	Not in sex-specific list	No	Yes
208828_at	POLE3	8.452	-0.007	9.48821e-05	0.226	8.439	-0.006	0.0616934	0.221	8.508	-0.009	0.00116096	0.284	Not in sex-specific list	No	Yes
208832_at	ATXN10	8.563	-0.005	0.000685746	0.18	8.677	-0.005	0.0371794	0.259	8.531	-0.006	0.00797755	0.205	Not in sex-specific list	No	Yes
208833_s_at	ATXN10	11.323	-0.006	1.34113e-07	0.367	11.327	-0.005	0.0029836	0.434	11.34	-0.006	0.000103711	0.374	Not in sex-specific list	No	Yes
208835_s_at	LUC7L3	8.592	0.014	0.000115278	0.222	8.536	0.012	0.0438233	0.247	8.522	0.018	0.0014286	0.276	Not in sex-specific list	No	Yes
208837_at	TMED3	7.497	-0.008	6.80142e-07	0.334	7.52	-0.007	0.00552076	0.395	7.508	-0.009	0.000326133	0.332	Not in sex-specific list	No	Yes
208838_at	CAND1	9.052	-0.007	1.82525e-07	0.361	9.129	-0.007	0.00393999	0.417	9.039	-0.008	3.69164e-05	0.414	Not in sex-specific list	No	Yes
208839_s_at	CAND1	9.108	-0.006	9.04696e-06	0.279	9.172	-0.006	0.0297817	0.275	9.095	-0.007	0.000275231	0.339	Not in sex-specific list	No	Yes
208857_s_at	PCMT1	11.527	-0.011	1.13607e-06	0.323	11.529	-0.008	0.0190655	0.309	11.605	-0.014	2.34144e-05	0.432	Not in sex-specific list	No	Yes
208869_s_at	GABARAPL1	10.446	-0.004	0.0367657	0.082	10.357	-0.001	0.856093	0.006	10.582	-0.009	0.00722902	0.209	Not in sex-specific list	No	Yes
208872_s_at	REEP5	10.416	-0.012	6.25938e-08	0.383	10.38	-0.01	0.0115319	0.343	10.509	-0.016	5.33964e-06	0.484	Not in sex-specific list	No	Yes
208890_s_at	PLXNB2	6.702	0.007	1.62704e-05	0.267	6.607	0.007	0.00515707	0.4	6.729	0.008	0.00275265	0.249	Not in sex-specific list	No	Yes
208899_x_at	ATP6V1D	10.767	-0.004	0.000524911	0.186	10.792	-0.003	0.0908959	0.191	10.793	-0.006	0.00187196	0.265	Not in sex-specific list	No	Yes
208909_at	UQCRFS1	11.345	-0.008	9.7478e-07	0.327	11.352	-0.007	0.0289623	0.277	11.368	-0.009	4.63286e-05	0.404	Not in sex-specific list	No	Yes
208910_s_at	C1QBP	9.349	-0.005	0.000375863	0.194	9.429	-0.005	0.0311716	0.272	9.324	-0.006	0.0110686	0.191	Not in sex-specific list	No	Yes
208922_s_at	NXF1	7.862	0.004	0.00054281	0.186	7.876	0.003	0.193958	0.13	7.819	0.006	0.00126607	0.281	Not in sex-specific list	No	Yes
208924_at	RNF11	11.497	-0.005	0.00255558	0.149	11.431	-0.003	0.193882	0.13	11.586	-0.008	0.00590785	0.218	Not in sex-specific list	No	Yes
209022_at	STAG2	8.345	0.009	1.16086e-05	0.274	8.243	0.009	0.0191238	0.308	8.356	0.01	0.00040579	0.325	Not in sex-specific list	No	Yes
209028_s_at	ABI1	8.807	-0.002	0.0953951	0.057	8.623	0.001	0.607625	0.033	8.972	-0.006	0.00228002	0.257	Not in sex-specific list	No	Yes
209031_at	CADM1	9.847	0.006	0.00024198	0.205	9.856	0.005	0.0917459	0.19	9.812	0.008	0.00328068	0.242	Not in sex-specific list	No	Yes
209036_s_at	MDH2	10.688	-0.007	5.01849e-06	0.292	10.73	-0.006	0.00694815	0.379	10.682	-0.007	0.00158263	0.272	Not in sex-specific list	No	Yes
209050_s_at	RALGDS	8.072	0.009	1.94603e-05	0.262	7.957	0.009	0.0127344	0.336	8.083	0.011	0.000724602	0.302	Not in sex-specific list	No	Yes
209057_x_at	CDC5L	6.916	-0.003	0.272541	0.028	6.718	0.003	0.510212	0.048	7.13	-0.008	0.00972624	0.197	Not in sex-specific list	No	Yes
209074_s_at	FAM107A	11.338	0.011	2.01177e-05	0.262	11.234	0.01	0.0496179	0.238	11.347	0.012	0.000217285	0.348	Not in sex-specific list	No	Yes
209080_x_at	GLRX3	8.564	-0.006	6.43896e-05	0.235	8.59	-0.005	0.0378067	0.258	8.585	-0.007	0.00116096	0.284	Not in sex-specific list	No	Yes
209092_s_at	GLOD4	8.668	-0.004	0.00127249	0.166	8.619	-0.003	0.164455	0.144	8.733	-0.006	0.00517337	0.223	Not in sex-specific list	No	Yes
209102_s_at	HBP1	7.259	0.007	3.77734e-05	0.247	7.128	0.008	0.0034303	0.424	7.309	0.008	0.0064971	0.214	Not in sex-specific list	No	Yes
209105_at	NCOA1	7.128	-0.004	0.0106294	0.114	7.014	-0.002	0.51344	0.048	7.213	-0.006	0.0167502	0.173	Not in sex-specific list	No	Yes
209130_at	SNAP23	5.825	0.012	0.000360712	0.195	5.748	0.011	0.0522004	0.234	5.808	0.014	0.00643485	0.214	Not in sex-specific list	No	Yes
209153_s_at	TCF3	5.765	0.003	0.0594734	0.07	5.858	0	0.973	0	5.64	0.007	0.000889107	0.294	Not in sex-specific list	No	Yes
209157_at	DNAJA2	9.414	-0.006	5.88478e-06	0.289	9.443	-0.006	0.0317816	0.27	9.428	-0.007	0.000161407	0.358	Not in sex-specific list	No	Yes
209158_s_at	CYTH2	8.796	-0.004	0.0119711	0.111	8.728	-0.002	0.611951	0.033	8.871	-0.006	0.00562267	0.22	Not in sex-specific list	No	Yes
209184_s_at	IRS2	8.817	0.006	3.34394e-05	0.25	8.812	0.005	0.0377501	0.258	8.783	0.007	0.000709065	0.303	Not in sex-specific list	No	Yes
209208_at	MPDU1	7.648	-0.004	7.22405e-05	0.232	7.632	-0.004	0.0392322	0.255	7.677	-0.005	0.00263387	0.251	Not in sex-specific list	No	Yes
209225_x_at	TNPO1	7.569	0.009	0.000208718	0.208	7.556	0.008	0.050315	0.236	7.534	0.011	0.00472178	0.227	Not in sex-specific list	No	Yes
209227_at	TUSC3	6.806	-0.011	2.66499e-05	0.255	7.129	-0.014	0.000610231	0.525	6.643	-0.01	0.0134061	0.183	Not in sex-specific list	No	Yes
209228_x_at	TUSC3	9.007	-0.012	2.55581e-07	0.354	9.083	-0.011	0.00814095	0.368	9.011	-0.013	4.55969e-05	0.405	Not in sex-specific list	No	Yes
209230_s_at	NUPR1	6.069	0.009	0.00303411	0.145	6.119	0.005	0.303012	0.093	5.952	0.013	0.00405409	0.233	Not in sex-specific list	No	Yes
209249_s_at	GHITM	11.342	-0.006	2.60417e-06	0.305	11.322	-0.005	0.0259818	0.285	11.388	-0.007	9.54756e-05	0.377	Not in sex-specific list	No	Yes
209272_at	NAB1	8.174	0.005	0.00130865	0.165	8.198	0.003	0.214872	0.122	8.124	0.006	0.00383001	0.235	Not in sex-specific list	No	Yes
209273_s_at	ISCA1	9.029	-0.009	5.12449e-08	0.388	9.037	-0.008	0.0100496	0.354	9.056	-0.011	1.31248e-05	0.451	Not in sex-specific list	No	Yes
209274_s_at	ISCA1	10.163	-0.006	5.96764e-06	0.288	10.135	-0.005	0.0389595	0.256	10.226	-0.008	8.34309e-05	0.382	Not in sex-specific list	No	Yes
209279_s_at	NSDHL	6.751	-0.004	3.7889e-05	0.247	6.741	-0.004	0.0288118	0.277	6.766	-0.005	0.00347863	0.239	Not in sex-specific list	No	Yes
209285_s_at	TASOR	6.912	0.009	7.03214e-05	0.233	6.829	0.008	0.0370813	0.259	6.92	0.01	0.00195426	0.263	Not in sex-specific list	No	Yes
209286_at	CDC42EP3	7.148	-0.009	8.71055e-06	0.28	7.188	-0.008	0.0126876	0.336	7.167	-0.01	0.000749813	0.301	Not in sex-specific list	No	Yes
209307_at	SWAP70	5.644	0.01	0.00702828	0.124	5.684	0.006	0.358271	0.079	5.512	0.014	0.00722902	0.209	Not in sex-specific list	No	Yes
209339_at	SIAH2	7.531	-0.006	1.30075e-06	0.32	7.486	-0.005	0.0362529	0.261	7.592	-0.008	4.43201e-05	0.407	Not in sex-specific list	No	Yes
209343_at	EFHD1	8.913	0.013	2.09543e-05	0.261	8.89	0.011	0.0438108	0.247	8.844	0.016	0.000340344	0.331	Not in sex-specific list	No	Yes
209363_s_at	MED21	7.05	-0.008	0.00108393	0.169	6.828	-0.004	0.38145	0.073	7.22	-0.011	0.00268318	0.25	Not in sex-specific list	No	Yes
209431_s_at	PATZ1	5.944	0.006	0.000321052	0.198	5.885	0.006	0.0751399	0.206	5.93	0.008	0.00193085	0.264	Not in sex-specific list	No	Yes
209484_s_at	NSL1	7.956	0.005	0.00346953	0.142	8.107	0.001	0.703179	0.021	7.82	0.008	0.00115847	0.284	Not in sex-specific list	No	Yes
209506_s_at	NR2F1	7.761	0.004	0.00327133	0.143	7.798	0.002	0.371141	0.075	7.7	0.006	0.00308687	0.244	Not in sex-specific list	No	Yes
209507_at	RPA3	8.039	-0.004	0.011394	0.112	8.005	-0.002	0.533038	0.044	8.115	-0.007	0.00462005	0.228	Not in sex-specific list	No	Yes
209515_s_at	RAB27A	4.772	0.005	0.00166956	0.159	4.838	0.004	0.16629	0.143	4.721	0.006	0.0168769	0.173	Not in sex-specific list	No	Yes
209541_at	IGF1	7.113	-0.013	3.76634e-06	0.298	7.392	-0.015	0.00528599	0.398	6.989	-0.013	0.000857403	0.295	Not in sex-specific list	No	Yes
209550_at	NDN	9.896	-0.006	0.000504131	0.187	9.901	-0.005	0.166638	0.143	9.936	-0.008	0.00159188	0.272	Not in sex-specific list	No	Yes
209558_s_at	HIP1R	7.477	0.009	2.01217e-06	0.311	7.432	0.009	0.00920998	0.36	7.467	0.01	0.000416975	0.324	Not in sex-specific list	No	Yes
209576_at	GNAI1	8.884	-0.01	1.74443e-05	0.265	8.972	-0.01	0.033021	0.268	8.854	-0.01	0.00101868	0.289	Not in sex-specific list	No	Yes
209581_at	PLAAT3	8.272	0.01	5.40397e-05	0.239	8.233	0.008	0.0478255	0.24	8.223	0.013	0.00058997	0.31	Not in sex-specific list	No	Yes
209582_s_at	CD200	9.136	-0.011	7.43015e-07	0.332	9.135	-0.009	0.011072	0.347	9.211	-0.015	3.96716e-05	0.411	Not in sex-specific list	No	Yes
209583_s_at	CD200	10.71	-0.006	1.50783e-05	0.268	10.697	-0.004	0.00604316	0.388	10.759	-0.008	0.000653391	0.306	Not in sex-specific list	No	Yes
209608_s_at	ACAT2	8.228	-0.007	0.000127637	0.219	8.246	-0.006	0.0980075	0.185	8.256	-0.008	0.00101246	0.289	Not in sex-specific list	No	Yes
209615_s_at	PAK1	9.219	-0.02	2.40795e-07	0.355	9.313	-0.018	0.0160715	0.321	9.243	-0.022	1.73435e-05	0.441	Not in sex-specific list	No	Yes
209630_s_at	FBXW2	7.581	-0.005	1.14436e-05	0.274	7.56	-0.005	0.0254055	0.287	7.604	-0.006	0.00153216	0.274	Not in sex-specific list	No	Yes
209636_at	NFKB2	5.081	0.002	0.238605	0.032	5.188	-0.002	0.464223	0.056	4.92	0.007	0.00463818	0.228	Not in sex-specific list	No	Yes
209677_at	PRKCI	5.339	-0.009	4.50477e-06	0.295	5.319	-0.007	0.0381995	0.257	5.388	-0.011	0.000175535	0.355	Not in sex-specific list	No	Yes
209697_at	PPP3CC	4.996	0.003	0.0887359	0.059	5.079	0	0.950067	0.001	4.86	0.008	0.00873509	0.201	Not in sex-specific list	No	Yes
209741_x_at	SCAPER	7.907	-0.003	0.0120048	0.111	7.88	-0.002	0.404628	0.068	7.962	-0.005	0.0120982	0.187	Not in sex-specific list	No	Yes
209786_at	HMGN4	7.397	-0.005	0.00105086	0.17	7.306	-0.004	0.259074	0.106	7.479	-0.007	0.00440623	0.23	Not in sex-specific list	No	Yes
209822_s_at	VLDLR	7.18	-0.01	2.40795e-07	0.356	7.31	-0.011	0.00551267	0.395	7.12	-0.009	0.000131054	0.365	Not in sex-specific list	No	Yes
209849_s_at	RAD51C	8.395	-0.006	6.00899e-05	0.237	8.42	-0.006	0.0522945	0.233	8.41	-0.007	0.00137451	0.278	Not in sex-specific list	No	Yes
209907_s_at	ITSN2	6.06	0.006	2.43638e-06	0.307	5.964	0.007	0.00323592	0.427	6.097	0.007	0.00119075	0.283	Not in sex-specific list	No	Yes
209944_at	ZNF410	7.369	0.004	0.010951	0.113	7.339	0.003	0.3479	0.081	7.341	0.006	0.0094573	0.198	Not in sex-specific list	No	Yes
209987_s_at	ASCL1	5.964	0.011	0.00149684	0.162	6.215	0.005	0.453472	0.058	5.691	0.018	0.00113935	0.285	Not in sex-specific list	No	Yes
210015_s_at	MAP2	9.113	-0.012	0.00274333	0.147	8.948	-0.007	0.425402	0.064	9.3	-0.017	0.00229104	0.257	Not in sex-specific list	No	Yes
210024_s_at	UBE2E3	10.437	-0.005	0.000138424	0.218	10.472	-0.005	0.0500485	0.237	10.448	-0.007	0.00232249	0.256	Not in sex-specific list	No	Yes
210079_x_at	KCNAB1	7.373	-0.007	0.000682091	0.18	7.421	-0.005	0.102735	0.181	7.42	-0.01	0.00137068	0.278	Not in sex-specific list	No	Yes
210104_at	MED6	7.525	-0.007	4.58441e-06	0.294	7.533	-0.006	0.0273454	0.281	7.556	-0.008	0.000180284	0.354	Not in sex-specific list	No	Yes
210105_s_at	FYN	10.246	0.004	0.0019018	0.156	10.261	0.003	0.35586	0.079	10.198	0.006	0.00100171	0.29	Not in sex-specific list	No	Yes
210155_at	MYOC	5.645	-0.004	0.0281178	0.089	5.599	-0.001	0.722897	0.019	5.738	-0.007	0.00648885	0.214	Not in sex-specific list	No	Yes
210156_s_at	PCMT1	10.714	-0.013	2.80714e-07	0.352	10.646	-0.009	0.0365552	0.26	10.845	-0.017	4.05601e-06	0.501	Not in sex-specific list	No	Yes
210202_s_at	BIN1	8.042	0.005	0.00819844	0.121	8.09	0.002	0.519424	0.046	7.954	0.007	0.00350577	0.239	Not in sex-specific list	No	Yes
210222_s_at	RTN1	12.884	-0.006	0.000722153	0.179	12.83	-0.004	0.242321	0.112	12.962	-0.008	0.00167195	0.27	Not in sex-specific list	No	Yes
210277_at	AP4S1	6.932	-0.008	1.11652e-05	0.275	7.057	-0.008	0.00911012	0.361	6.894	-0.009	0.00109656	0.286	Not in sex-specific list	No	Yes
210278_s_at	AP4S1	7.304	-0.013	5.6209e-08	0.386	7.452	-0.014	0.00536128	0.397	7.244	-0.013	2.50756e-05	0.429	Not in sex-specific list	No	Yes
210285_x_at	WTAP	7.949	-0.009	3.93786e-06	0.297	7.989	-0.009	0.00895643	0.362	7.958	-0.01	0.000846421	0.296	Not in sex-specific list	No	Yes
210338_s_at	HSPA8	12.989	-0.011	2.24977e-07	0.357	13.041	-0.011	0.00955266	0.357	12.986	-0.012	7.434e-05	0.387	Not in sex-specific list	No	Yes
210349_at	CAMK4	6.527	-0.008	5.48464e-08	0.386	6.555	-0.007	0.00819131	0.367	6.541	-0.009	1.32241e-05	0.451	Not in sex-specific list	No	Yes
210355_at	PTHLH	5.529	-0.006	4.69423e-08	0.39	5.63	-0.007	0.00405008	0.415	5.483	-0.006	1.7346e-05	0.44	Not in sex-specific list	No	Yes
210448_s_at	P2RX5	7.738	-0.007	3.14883e-06	0.301	7.874	-0.008	0.000607192	0.526	7.664	-0.006	0.00685485	0.211	Not in sex-specific list	No	Yes
210465_s_at	SNAPC3	7.973	-0.009	1.9914e-05	0.262	8.147	-0.01	0.00851611	0.365	7.887	-0.009	0.00455658	0.228	Not in sex-specific list	No	Yes
210639_s_at	ATG5	7.279	-0.011	2.6158e-07	0.353	7.236	-0.009	0.026982	0.282	7.361	-0.014	1.12261e-05	0.456	Not in sex-specific list	No	Yes
210671_x_at	MAPK8	6.372	-0.006	0.00783633	0.122	6.373	-0.004	0.345372	0.082	6.439	-0.009	0.00687387	0.211	Not in sex-specific list	No	Yes
210681_s_at	USP15	6.587	-0.005	0.000369221	0.195	6.547	-0.004	0.20225	0.127	6.645	-0.007	0.00118373	0.283	Not in sex-specific list	No	Yes
210691_s_at	CACYBP	9.032	-0.008	0.00044718	0.19	9.125	-0.008	0.0755672	0.205	9.019	-0.009	0.00517591	0.223	Not in sex-specific list	No	Yes
210711_at	LINC00260	4.794	0.004	0.00231132	0.151	4.784	0.003	0.259789	0.106	4.76	0.005	0.00216009	0.26	Not in sex-specific list	No	Yes
210719_s_at	HMG20B	5.409	0.008	0.00168924	0.159	5.457	0.005	0.277021	0.101	5.304	0.012	0.00250414	0.253	Not in sex-specific list	No	Yes
210740_s_at	ITPK1	10.04	0.005	7.66229e-06	0.283	9.999	0.005	0.0330846	0.267	10.04	0.006	0.000200175	0.35	Not in sex-specific list	No	Yes
210779_x_at	GEMIN2	6.074	-0.004	0.00188436	0.156	6.027	-0.002	0.37814	0.074	6.139	-0.006	0.00171084	0.269	Not in sex-specific list	No	Yes
210787_s_at	CAMKK2	8.547	-0.021	4.28601e-08	0.393	8.573	-0.02	0.00971562	0.356	8.59	-0.023	1.33664e-05	0.45	Not in sex-specific list	No	Yes
210826_x_at	RAD17	7.611	-0.004	0.0131404	0.109	7.568	-0.001	0.728778	0.018	7.705	-0.007	0.0011343	0.285	Not in sex-specific list	No	Yes
210829_s_at	SSBP2	8.01	-0.005	5.81096e-07	0.338	8.048	-0.005	0.00563945	0.393	8.001	-0.006	0.000306071	0.334	Not in sex-specific list	No	Yes
210840_s_at	IQGAP1	5.856	0.008	0.000129459	0.219	5.772	0.008	0.012686	0.337	5.894	0.008	0.0166036	0.173	Not in sex-specific list	No	Yes
210847_x_at	TNFRSF25	5.478	0.006	0.00215476	0.153	5.384	0.006	0.135718	0.159	5.477	0.008	0.00573509	0.219	Not in sex-specific list	No	Yes
210854_x_at	SLC6A8	7.412	0.004	0.00180073	0.157	7.434	0.003	0.246765	0.11	7.363	0.006	0.00380691	0.235	Not in sex-specific list	No	Yes
210944_s_at	CAPN3	7.256	0.012	0.000591715	0.184	7.353	0.008	0.267062	0.104	7.105	0.017	0.000877016	0.295	Not in sex-specific list	No	Yes
210967_x_at	CACNB1	7.546	-0.005	0.00180335	0.157	7.582	-0.004	0.167429	0.142	7.575	-0.007	0.00352453	0.239	Not in sex-specific list	No	Yes
210968_s_at	RTN4	13.209	-0.007	4.69688e-06	0.294	13.226	-0.005	0.0405488	0.253	13.242	-0.008	4.59735e-05	0.404	Not in sex-specific list	No	Yes
210991_s_at	RIMS3	6.034	-0.005	0.001878	0.156	6.046	-0.003	0.225104	0.118	6.075	-0.006	0.00220374	0.259	Not in sex-specific list	No	Yes
210994_x_at	TRIM23	7.83	-0.01	0.00157743	0.16	7.684	-0.006	0.35876	0.078	7.991	-0.014	0.00226406	0.257	Not in sex-specific list	No	Yes
210995_s_at	TRIM23	7.803	-0.011	0.000862331	0.175	7.668	-0.007	0.307637	0.092	7.947	-0.014	0.00159895	0.272	Not in sex-specific list	No	Yes
211033_s_at	PEX7	6.776	-0.002	0.217527	0.035	6.649	0.001	0.632396	0.03	6.916	-0.006	0.0102271	0.195	Not in sex-specific list	No	Yes
211042_x_at	MCAM	6.127	0.004	0.00291408	0.146	6.065	0.004	0.112932	0.174	6.129	0.005	0.0111274	0.191	Not in sex-specific list	No	Yes
211056_s_at	SRD5A1	7.532	-0.005	0.000171992	0.213	7.56	-0.004	0.0442301	0.246	7.559	-0.007	0.00111099	0.286	Not in sex-specific list	No	Yes
211071_s_at	MLLT11	12.963	-0.004	0.000615299	0.183	12.922	-0.002	0.211824	0.123	13.016	-0.005	0.00186733	0.265	Not in sex-specific list	No	Yes
211090_s_at	PRPF4B	7.148	-0.008	0.00202128	0.155	6.918	-0.004	0.44003	0.061	7.322	-0.011	0.0037754	0.236	Not in sex-specific list	No	Yes
211150_s_at	DLAT	7.538	-0.01	5.90053e-08	0.385	7.548	-0.009	0.0141242	0.329	7.577	-0.012	5.02328e-06	0.488	Not in sex-specific list	No	Yes
211220_s_at	HSF2	5.381	-0.006	0.00102462	0.171	5.311	-0.005	0.18472	0.134	5.44	-0.008	0.00872148	0.201	Not in sex-specific list	No	Yes
211259_s_at	BMP7	5.862	0.003	0.0283036	0.089	5.965	0	0.999038	0	5.745	0.006	0.00135722	0.278	Not in sex-specific list	No	Yes
211270_x_at	PTBP1	6.72	0.006	0.000616077	0.183	6.658	0.006	0.0656245	0.216	6.72	0.008	0.00775077	0.206	Not in sex-specific list	No	Yes
211271_x_at	PTBP1	6.784	0.005	0.00102373	0.171	6.777	0.003	0.230964	0.116	6.734	0.007	0.000872353	0.295	Not in sex-specific list	No	Yes
211275_s_at	GYG1	8.62	0.006	0.00119135	0.167	8.57	0.005	0.0602016	0.223	8.624	0.006	0.019895	0.165	Not in sex-specific list	No	Yes
211286_x_at	CSF2RA	4.931	0.003	0.0232679	0.094	4.976	0.001	0.673726	0.025	4.851	0.006	0.00759961	0.207	Not in sex-specific list	No	Yes
211318_s_at	RAE1	7.792	-0.005	0.00369914	0.14	7.677	-0.002	0.543088	0.043	7.92	-0.008	0.00210515	0.261	Not in sex-specific list	No	Yes
211379_x_at	B3GALNT1	7.767	-0.013	0.000166297	0.213	7.811	-0.011	0.0275293	0.281	7.818	-0.016	0.00407666	0.233	Not in sex-specific list	No	Yes
211405_x_at	IFNA17	6.131	-0.003	0.115339	0.052	6.023	0.001	0.848095	0.007	6.282	-0.008	0.00502918	0.224	Not in sex-specific list	No	Yes
211426_x_at	GNAQ	8.137	-0.005	0.00280682	0.147	8.124	-0.003	0.233688	0.115	8.192	-0.007	0.00511453	0.224	Not in sex-specific list	No	Yes
211474_s_at	SERPINB6	7.588	0.006	0.00121322	0.167	7.554	0.005	0.217998	0.121	7.554	0.008	0.00147604	0.275	Not in sex-specific list	No	Yes
211502_s_at	CDK14	7.322	-0.006	0.0417722	0.079	7.219	-0.002	0.79411	0.011	7.46	-0.01	0.00333372	0.241	Not in sex-specific list	No	Yes
211504_x_at	ROCK2	7.486	-0.006	0.00029139	0.2	7.432	-0.004	0.148492	0.152	7.57	-0.009	0.00118373	0.283	Not in sex-specific list	No	Yes
211513_s_at	OGFR	5.753	0.003	0.0393609	0.08	5.818	0	0.987208	0	5.632	0.007	0.000825688	0.297	Not in sex-specific list	No	Yes
211520_s_at	GRIA1	6.6	-0.011	2.66208e-06	0.305	6.852	-0.013	0.00819131	0.367	6.481	-0.01	0.000273843	0.339	Not in sex-specific list	No	Yes
211534_x_at	PTPRN2	7.986	-0.005	0.0019269	0.156	7.986	-0.003	0.267578	0.104	8.045	-0.008	0.00171084	0.269	Not in sex-specific list	No	Yes
211555_s_at	GUCY1B1	10.055	-0.012	5.51186e-06	0.29	10.041	-0.01	0.0478255	0.24	10.144	-0.016	6.33601e-05	0.392	Not in sex-specific list	No	Yes
211594_s_at	MRPL9	7.653	-0.004	0.000954581	0.172	7.649	-0.003	0.151955	0.15	7.686	-0.006	0.00432569	0.231	Not in sex-specific list	No	Yes
211597_s_at	HOPX	11.886	-0.007	2.18039e-05	0.26	12.004	-0.008	0.00207876	0.456	11.846	-0.008	0.00495814	0.225	Not in sex-specific list	No	Yes
211599_x_at	MET	7.188	-0.007	0.000833575	0.176	7.176	-0.004	0.120783	0.169	7.265	-0.01	0.00227543	0.257	Not in sex-specific list	No	Yes
211622_s_at	ARF3	9.904	-0.008	7.5966e-06	0.283	9.963	-0.008	0.0324874	0.269	9.91	-0.009	0.000176316	0.355	Not in sex-specific list	No	Yes
211698_at	EID1	9.904	-0.002	0.215823	0.035	9.816	0.001	0.828348	0.008	10.018	-0.006	0.0542905	0.119	Not in sex-specific list	No	Yes
211710_x_at	RPL4	11.752	0.004	0.00189119	0.156	11.742	0.003	0.228732	0.117	11.717	0.006	0.00276396	0.249	Not in sex-specific list	No	Yes
211725_s_at	BID	7.87	-0.008	2.29826e-07	0.357	7.92	-0.009	0.00256634	0.443	7.827	-0.007	0.0012861	0.28	Not in sex-specific list	No	Yes
211762_s_at	KPNA2	8.759	-0.005	0.000162752	0.214	8.709	-0.004	0.174705	0.139	8.806	-0.006	0.000955633	0.291	Not in sex-specific list	No	Yes
211763_s_at	UBE2B	9.678	-0.006	1.36373e-05	0.27	9.718	-0.005	0.031726	0.27	9.695	-0.008	0.000233786	0.345	Not in sex-specific list	No	Yes
211776_s_at	EPB41L3	10.309	-0.005	0.028472	0.089	10.246	-0.002	0.695652	0.022	10.415	-0.008	0.00832885	0.203	Not in sex-specific list	No	Yes
211812_s_at	B3GALNT1	7.348	-0.014	7.22815e-08	0.38	7.394	-0.013	0.0130705	0.335	7.378	-0.016	7.19119e-06	0.472	Not in sex-specific list	No	Yes
211841_s_at	TNFRSF25	5.664	0.004	0.010095	0.115	5.674	0.002	0.425916	0.064	5.605	0.006	0.00571919	0.219	Not in sex-specific list	No	Yes
211855_s_at	SLC25A14	8.041	-0.007	3.49469e-06	0.299	8.144	-0.007	0.0064889	0.383	7.997	-0.007	0.0011709	0.284	Not in sex-specific list	No	Yes
211890_x_at	CAPN3	6.489	0.01	0.00458465	0.135	6.716	0.004	0.606928	0.033	6.253	0.016	0.00162252	0.271	Not in sex-specific list	No	Yes
211925_s_at	PLCB1	7.28	-0.013	5.27948e-07	0.34	7.29	-0.012	0.0160715	0.321	7.312	-0.015	9.14461e-05	0.379	Not in sex-specific list	No	Yes
211945_s_at	ITGB1	8.546	0.01	9.98511e-05	0.225	8.503	0.009	0.0748055	0.206	8.52	0.012	0.00116096	0.284	Not in sex-specific list	No	Yes
211955_at	IPO5	8.846	-0.006	5.96764e-06	0.288	8.844	-0.005	0.0313403	0.271	8.879	-0.008	0.00023264	0.345	Not in sex-specific list	No	Yes
211974_x_at	RBPJ	9.243	0.006	2.95997e-06	0.303	9.228	0.005	0.0325502	0.268	9.211	0.008	4.17346e-05	0.409	Not in sex-specific list	No	Yes
211976_at	NUDT3	10.574	0.005	3.2183e-05	0.251	10.514	0.005	0.0214762	0.3	10.589	0.005	0.00166243	0.27	Not in sex-specific list	No	Yes
211986_at	AHNAK	7.543	0.011	3.91342e-06	0.297	7.529	0.01	0.0283133	0.279	7.528	0.012	0.000389286	0.326	Not in sex-specific list	No	Yes
211993_at	WNK1	5.923	0.006	0.00069711	0.18	5.941	0.004	0.259635	0.106	5.869	0.008	0.000821627	0.297	Not in sex-specific list	No	Yes
211998_at	H3-3B	7.559	0.01	2.95544e-05	0.253	7.447	0.01	0.00954683	0.357	7.582	0.011	0.00312486	0.244	Not in sex-specific list	No	Yes
212007_at	UBXN4	7.808	0.009	5.98085e-05	0.237	7.825	0.007	0.0414473	0.251	7.742	0.012	0.00124439	0.281	Not in sex-specific list	No	Yes
212038_s_at	VDAC1	10.778	-0.005	0.000818122	0.176	10.81	-0.005	0.210153	0.124	10.788	-0.006	0.00111537	0.286	Not in sex-specific list	No	Yes
212041_at	ATP6V0D1	11.108	-0.008	4.28601e-08	0.393	11.197	-0.009	0.00344944	0.424	11.073	-0.008	3.84119e-05	0.412	Not in sex-specific list	No	Yes
212081_x_at	PRRC2A	7.875	0.004	0.00376318	0.14	7.931	0.002	0.541886	0.043	7.791	0.007	0.000955583	0.291	Not in sex-specific list	No	Yes
212092_at	PEG10	8.21	-0.01	0.000170928	0.213	8.142	-0.008	0.156428	0.148	8.301	-0.013	0.000986339	0.29	Not in sex-specific list	No	Yes
212096_s_at	MTUS1	8.533	0.008	0.00131814	0.165	8.56	0.005	0.22703	0.118	8.429	0.012	0.00174915	0.268	Not in sex-specific list	No	Yes
212117_at	RHOQ	7.621	0.008	6.39361e-07	0.336	7.575	0.007	0.0221793	0.298	7.598	0.01	1.11663e-05	0.458	Not in sex-specific list	No	Yes
212119_at	RHOQ	8.73	0.009	2.44069e-07	0.355	8.694	0.008	0.0144634	0.327	8.71	0.01	1.7346e-05	0.44	Not in sex-specific list	No	Yes
212120_at	RHOQ	8.265	0.009	3.81122e-06	0.298	8.094	0.01	0.00562725	0.393	8.335	0.009	0.000803352	0.298	Not in sex-specific list	No	Yes
212122_at	RHOQ	4.309	0.009	0.000185022	0.211	4.207	0.008	0.0284972	0.278	4.306	0.011	0.00297964	0.246	Not in sex-specific list	No	Yes
212144_at	SUN2	8.235	0.007	4.86165e-08	0.389	8.153	0.007	0.00145642	0.48	8.253	0.008	4.39412e-05	0.407	Not in sex-specific list	No	Yes
212145_at	MRPS27	8.786	-0.005	5.81994e-05	0.238	8.799	-0.004	0.0384924	0.257	8.808	-0.006	0.00105508	0.288	Not in sex-specific list	No	Yes
212185_x_at	MT2A	10.384	0.012	0.000666138	0.181	10.405	0.011	0.175704	0.138	10.32	0.015	0.00360422	0.238	Not in sex-specific list	No	Yes
212259_s_at	PBXIP1	7.065	0.009	0.000223685	0.207	7.038	0.008	0.0847274	0.196	7.046	0.01	0.00353432	0.239	Not in sex-specific list	No	Yes
212271_at	MAPK1	9.897	-0.007	3.72318e-07	0.346	9.84	-0.005	0.0366664	0.26	9.963	-0.009	1.71526e-05	0.443	Not in sex-specific list	No	Yes
212288_at	FNBP1	7.821	0.01	1.86249e-06	0.313	7.713	0.009	0.00458084	0.408	7.826	0.012	0.000193174	0.352	Not in sex-specific list	No	Yes
212299_at	NEK9	6.977	0.007	1.19079e-06	0.322	6.863	0.008	0.00189684	0.461	7.027	0.007	0.00121839	0.282	Not in sex-specific list	No	Yes
212306_at	CLASP2	10.4	-0.008	3.65152e-06	0.299	10.414	-0.007	0.0366525	0.26	10.429	-0.009	9.65127e-05	0.377	Not in sex-specific list	No	Yes
212308_at	CLASP2	10.183	-0.005	7.01746e-05	0.233	10.213	-0.005	0.0544626	0.23	10.19	-0.006	0.00144697	0.276	Not in sex-specific list	No	Yes
212339_at	EPB41L1	10.144	0.007	1.43769e-05	0.269	10.043	0.007	0.00727603	0.375	10.186	0.007	0.00353945	0.239	Not in sex-specific list	No	Yes
212359_s_at	ZSWIM8	6.884	0.005	3.44249e-06	0.3	6.861	0.004	0.0355	0.262	6.869	0.006	5.05604e-05	0.4	Not in sex-specific list	No	Yes
212365_at	MYO1B	7.767	-0.008	1.21255e-07	0.37	7.84	-0.008	0.00319178	0.429	7.762	-0.009	4.43201e-05	0.407	Not in sex-specific list	No	Yes
212408_at	TOR1AIP1	8.544	0.007	0.000123676	0.22	8.494	0.006	0.0565187	0.228	8.547	0.007	0.00276396	0.249	Not in sex-specific list	No	Yes
212418_at	ELF1	4.717	0.008	0.00161366	0.16	4.841	0.003	0.422017	0.065	4.547	0.013	0.000825608	0.297	Not in sex-specific list	No	Yes
212419_at	ZCCHC24	8.029	0.011	1.90829e-05	0.263	8.007	0.009	0.0421372	0.25	7.963	0.014	0.000244394	0.343	Not in sex-specific list	No	Yes
212423_at	ZCCHC24	8.681	0.011	4.75759e-06	0.293	8.69	0.009	0.0232958	0.294	8.6	0.015	0.000131625	0.365	Not in sex-specific list	No	Yes
212437_at	CENPB	6.598	0.004	0.0149472	0.105	6.728	0	0.873403	0.005	6.442	0.009	0.0026582	0.251	Not in sex-specific list	No	Yes
212453_at	KIFBP	9.676	-0.004	0.0119959	0.111	9.616	-0.002	0.509542	0.048	9.74	-0.005	0.0127336	0.185	Not in sex-specific list	No	Yes
212461_at	AZIN1	10.514	-0.008	9.58071e-07	0.327	10.511	-0.007	0.0071851	0.376	10.546	-0.009	0.000279182	0.338	Not in sex-specific list	No	Yes
212463_at	CD59	7.741	0.009	0.000175116	0.212	7.616	0.009	0.0335684	0.266	7.748	0.011	0.00217598	0.259	Not in sex-specific list	No	Yes
212487_at	GPATCH8	7.479	0.008	5.27215e-06	0.291	7.42	0.008	0.00844782	0.365	7.494	0.008	0.00155701	0.273	Not in sex-specific list	No	Yes
212494_at	TNS2	7.208	0.007	1.42979e-05	0.269	7.118	0.006	0.0202475	0.304	7.225	0.007	0.000417042	0.324	Not in sex-specific list	No	Yes
212514_x_at	DDX3X	8.125	-0.006	0.00758658	0.122	8.152	-0.003	0.4147	0.066	8.208	-0.01	0.00114973	0.284	Not in sex-specific list	No	Yes
212548_s_at	FRYL	7.872	0.008	3.28233e-06	0.301	7.85	0.006	0.00998178	0.355	7.829	0.01	0.000118837	0.369	Not in sex-specific list	No	Yes
212553_at	RPRD2	7.723	0.006	0.000220351	0.207	7.724	0.006	0.0515497	0.234	7.715	0.006	0.0104717	0.194	Not in sex-specific list	No	Yes
212554_at	CAP2	11.115	-0.005	0.000189196	0.21	11.194	-0.005	0.0268203	0.283	11.1	-0.006	0.00381068	0.235	Not in sex-specific list	No	Yes
212556_at	SCRIB	6.8	0.005	0.00190353	0.156	6.854	0.003	0.311393	0.091	6.715	0.008	0.00249143	0.253	Not in sex-specific list	No	Yes
212567_s_at	MAP4	8.149	0.006	2.40632e-05	0.258	8.179	0.004	0.0463358	0.243	8.087	0.008	0.000340344	0.331	Not in sex-specific list	No	Yes
212571_at	CHD8	7.662	0.004	6.81617e-05	0.234	7.667	0.004	0.0664436	0.215	7.632	0.006	0.000888074	0.294	Not in sex-specific list	No	Yes
212594_at	PDCD4	5.15	0.003	0.0847367	0.06	5.219	0	0.99607	0	5.027	0.007	0.00193281	0.264	Not in sex-specific list	No	Yes
212636_at	QKI	10.606	0.01	0.000329745	0.197	10.543	0.009	0.0568498	0.227	10.598	0.011	0.0065923	0.213	Not in sex-specific list	No	Yes
212665_at	TIPARP	6.752	0.009	0.000955445	0.172	6.754	0.008	0.143544	0.155	6.698	0.012	0.00627833	0.215	Not in sex-specific list	No	Yes
212712_at	CAMSAP1	7.642	-0.008	1.28135e-08	0.416	7.651	-0.008	0.0113728	0.344	7.661	-0.009	2.28549e-06	0.518	Not in sex-specific list	No	Yes
212715_s_at	MICAL3	6.565	0.006	0.000266334	0.202	6.567	0.004	0.0545592	0.23	6.512	0.008	0.00189065	0.265	Not in sex-specific list	No	Yes
212719_at	PHLPP1	7.861	0.009	0.000204117	0.209	7.905	0.006	0.060372	0.223	7.765	0.012	0.00171037	0.269	Not in sex-specific list	No	Yes
212723_at	JMJD6	6.089	0.004	0.0811777	0.061	6.16	0	0.995552	0	5.931	0.01	0.00428653	0.231	Not in sex-specific list	No	Yes
212726_at	PHF2	6.893	0.005	6.94548e-05	0.233	6.836	0.005	0.0131427	0.334	6.904	0.006	0.00486376	0.226	Not in sex-specific list	No	Yes
212729_at	DLG3	7.545	-0.009	8.56844e-07	0.329	7.638	-0.008	0.0157258	0.322	7.54	-0.01	1.89897e-05	0.437	Not in sex-specific list	No	Yes
212730_at	SYNM	9.495	0.004	0.00995622	0.116	9.535	0.003	0.455588	0.058	9.436	0.006	0.00984414	0.196	Not in sex-specific list	No	Yes
212820_at	DMXL2	9.937	-0.005	0.00530198	0.131	9.89	-0.002	0.416062	0.066	10.026	-0.008	0.00356234	0.238	Not in sex-specific list	No	Yes
212829_at	PIP4K2A	9.298	0.014	2.3051e-07	0.357	9.26	0.012	0.0113728	0.345	9.234	0.017	1.12261e-05	0.457	Not in sex-specific list	No	Yes
212841_s_at	PPFIBP2	6.052	0.004	0.0336374	0.085	6.182	0	0.988159	0	5.9	0.008	0.00203075	0.262	Not in sex-specific list	No	Yes
212852_s_at	RO60	8.583	0.01	2.88555e-05	0.253	8.447	0.01	0.0160187	0.321	8.619	0.011	0.00163216	0.271	Not in sex-specific list	No	Yes
212854_x_at	NBPF1	8.681	0.007	7.4093e-06	0.284	8.562	0.008	0.00621774	0.386	8.746	0.007	0.00398693	0.234	Not in sex-specific list	No	Yes
212857_x_at	SUB1	10.863	-0.006	2.10509e-05	0.261	10.94	-0.006	0.00440128	0.41	10.847	-0.007	0.00273977	0.249	Not in sex-specific list	No	Yes
212859_x_at	MT1E	9.546	0.013	0.000588025	0.184	9.593	0.011	0.191404	0.131	9.478	0.015	0.00281958	0.248	Not in sex-specific list	No	Yes
212946_at	VWA8	7.248	0.005	0.000923097	0.173	7.388	0.002	0.424449	0.064	7.114	0.008	0.00101429	0.289	Not in sex-specific list	No	Yes
212960_at	TBC1D9	7.346	-0.007	8.83367e-05	0.228	7.39	-0.007	0.0442301	0.246	7.36	-0.009	0.00185241	0.266	Not in sex-specific list	No	Yes
212961_x_at	EOLA2	8.885	-0.007	1.30721e-05	0.271	8.929	-0.006	0.0228154	0.296	8.897	-0.008	0.000510551	0.316	Not in sex-specific list	No	Yes
212981_s_at	TCAF1	8.625	-0.005	0.0310792	0.087	8.477	-0.001	0.71806	0.019	8.769	-0.008	0.0223715	0.16	Not in sex-specific list	No	Yes
212993_at	NACC2	8.716	0.012	2.18596e-05	0.26	8.657	0.01	0.0339054	0.266	8.684	0.014	0.000498809	0.317	Not in sex-specific list	No	Yes
213034_at	SIK3	9.44	0.005	0.000945773	0.173	9.546	0.003	0.277103	0.101	9.335	0.008	0.00243374	0.254	Not in sex-specific list	No	Yes
213073_at	ZFYVE26	6.081	0.005	0.00101095	0.171	6.036	0.004	0.0935988	0.189	6.073	0.006	0.00657321	0.213	Not in sex-specific list	No	Yes
213074_at	PHIP	7.125	0.009	3.71802e-05	0.248	7.025	0.009	0.0113815	0.344	7.156	0.009	0.00455373	0.228	Not in sex-specific list	No	Yes
213128_s_at	UBE3A	8.437	-0.005	0.00242064	0.15	8.42	-0.003	0.222099	0.119	8.498	-0.007	0.00430182	0.231	Not in sex-specific list	No	Yes
213144_at	GOSR2	7.033	-0.006	4.96572e-05	0.241	7.109	-0.006	0.0214397	0.3	7.019	-0.006	0.00172755	0.268	Not in sex-specific list	No	Yes
213149_at	DLAT	7.663	-0.006	0.000363912	0.195	7.639	-0.005	0.0984189	0.185	7.715	-0.008	0.00335239	0.241	Not in sex-specific list	No	Yes
213230_at	CDR2L	6.471	0.004	0.00153153	0.161	6.522	0.002	0.265316	0.104	6.409	0.005	0.00350577	0.239	Not in sex-specific list	No	Yes
213256_at	MARCHF3	4.48	0.005	0.00412959	0.137	4.555	0.002	0.550484	0.042	4.37	0.009	0.00112416	0.285	Not in sex-specific list	No	Yes
213289_at	APOOL	7.3	-0.005	0.00325853	0.143	7.225	-0.003	0.454114	0.058	7.391	-0.008	0.00227764	0.257	Not in sex-specific list	No	Yes
213305_s_at	PPP2R5C	7.361	-0.008	8.57541e-08	0.376	7.384	-0.008	0.00281213	0.437	7.351	-0.008	0.000291477	0.336	Not in sex-specific list	No	Yes
213315_x_at	EOLA1	8.994	-0.008	1.98693e-06	0.311	9.023	-0.007	0.0169206	0.318	9.022	-0.009	8.56714e-05	0.381	Not in sex-specific list	No	Yes
213328_at	NEK1	6.84	0.008	0.000200495	0.209	6.968	0.005	0.113137	0.174	6.729	0.01	0.00270245	0.25	Not in sex-specific list	No	Yes
213331_s_at	NEK1	6.135	0.006	0.000439401	0.191	6.156	0.004	0.163407	0.145	6.08	0.008	0.00172462	0.268	Not in sex-specific list	No	Yes
213357_at	GTF2H5	9.035	-0.002	0.104984	0.054	8.977	0	0.966873	0	9.123	-0.005	0.00994263	0.196	Not in sex-specific list	No	Yes
213381_at	VSTM4	5.72	0.003	0.0746613	0.063	5.803	0	0.987179	0	5.614	0.006	0.00460643	0.228	Not in sex-specific list	No	Yes
213383_at	SBF1	6.471	0.005	0.00231446	0.151	6.516	0.004	0.330143	0.086	6.404	0.007	0.00346634	0.24	Not in sex-specific list	No	Yes
213400_s_at	TBL1X	6.862	0.008	2.51577e-06	0.307	6.891	0.006	0.0414473	0.251	6.793	0.011	4.5359e-05	0.405	Not in sex-specific list	No	Yes
213404_s_at	RHEB	10.092	-0.004	0.00622719	0.127	10.057	-0.002	0.414038	0.066	10.172	-0.007	0.0027618	0.249	Not in sex-specific list	No	Yes
213417_at	TBX2	4.993	0.003	0.0295768	0.088	5.083	0	0.969717	0	4.872	0.007	0.000825608	0.297	Not in sex-specific list	No	Yes
213423_x_at	TUSC3	9.536	-0.01	2.54066e-06	0.306	9.583	-0.009	0.0196791	0.306	9.571	-0.013	8.24879e-05	0.383	Not in sex-specific list	No	Yes
213438_at	NFASC	8.826	0.007	7.23709e-07	0.333	8.675	0.008	0.000791225	0.515	8.895	0.007	0.000952795	0.291	Not in sex-specific list	No	Yes
213447_at	IPW	8.239	0.005	2.83738e-05	0.254	8.23	0.005	0.00153531	0.478	8.234	0.006	0.00972624	0.197	Not in sex-specific list	No	Yes
213461_at	NUDT21	6.654	-0.015	4.98514e-05	0.241	6.639	-0.013	0.0804636	0.2	6.713	-0.017	0.000872353	0.295	Not in sex-specific list	No	Yes
213465_s_at	PPP1R7	9.748	-0.006	8.3061e-07	0.33	9.845	-0.007	0.00166659	0.472	9.693	-0.006	0.0023584	0.256	Not in sex-specific list	No	Yes
213473_at	BRAP	6.914	0.003	0.0754122	0.063	7.009	0	0.994073	0	6.798	0.006	0.00400922	0.234	Not in sex-specific list	No	Yes
213532_at	ADAM17	6.546	0.006	0.000677903	0.181	6.412	0.006	0.0652849	0.217	6.581	0.007	0.0037419	0.236	Not in sex-specific list	No	Yes
213562_s_at	SQLE	5.744	-0.007	0.000285065	0.201	5.621	-0.005	0.177814	0.137	5.823	-0.008	0.00309748	0.244	Not in sex-specific list	No	Yes
213608_s_at	SRRD	7.37	-0.005	6.49459e-05	0.235	7.403	-0.004	0.0421372	0.25	7.386	-0.006	0.000778233	0.299	Not in sex-specific list	No	Yes
213617_s_at	TPGS2	9.09	-0.008	4.21642e-07	0.344	9.175	-0.008	0.0078196	0.371	9.067	-0.009	8.56714e-05	0.381	Not in sex-specific list	No	Yes
213656_s_at	KLC1	7.286	0.008	0.000901915	0.174	7.297	0.006	0.258157	0.107	7.202	0.012	0.000865322	0.295	Not in sex-specific list	No	Yes
213721_at	SOX2	7.177	0.009	0.000811453	0.176	7.24	0.005	0.225005	0.118	7.051	0.013	0.00137567	0.278	Not in sex-specific list	No	Yes
213807_x_at	MET	6.156	-0.006	0.00192153	0.156	6.149	-0.003	0.246463	0.111	6.23	-0.009	0.00162069	0.271	Not in sex-specific list	No	Yes
213824_at	OLIG2	5.022	0.004	0.0358684	0.083	5.117	0.001	0.808148	0.01	4.898	0.008	0.00903308	0.2	Not in sex-specific list	No	Yes
213839_at	CLMN	5.686	0.011	0.000407346	0.192	5.587	0.01	0.0265659	0.284	5.673	0.013	0.00725687	0.209	Not in sex-specific list	No	Yes
213843_x_at	SLC6A8	7.149	0.004	0.00813945	0.121	7.186	0.002	0.566389	0.039	7.073	0.007	0.00184561	0.266	Not in sex-specific list	No	Yes
213850_s_at	SCAF11	7.152	0.008	7.66034e-05	0.231	7.178	0.007	0.0197778	0.306	7.108	0.009	0.00520601	0.223	Not in sex-specific list	No	Yes
213911_s_at	H2AZ1	10.96	-0.006	2.95544e-05	0.253	10.904	-0.004	0.0442301	0.246	11.033	-0.008	0.000446987	0.321	Not in sex-specific list	No	Yes
213924_at	GNAL	9.806	-0.008	7.49475e-07	0.332	9.915	-0.009	0.00120662	0.492	9.761	-0.008	0.00116096	0.284	Not in sex-specific list	No	Yes
214212_x_at	FERMT2	5.678	0.008	0.000302852	0.199	5.717	0.005	0.144792	0.154	5.591	0.011	0.00119503	0.283	Not in sex-specific list	No	Yes
214257_s_at	SEC22B	8.775	-0.006	0.00941796	0.117	8.744	-0.003	0.32778	0.086	8.854	-0.008	0.0133744	0.183	Not in sex-specific list	No	Yes
214269_at	SLC49A3	4.786	0.003	0.0853745	0.06	4.843	0	0.949127	0.001	4.69	0.006	0.014051	0.181	Not in sex-specific list	No	Yes
214292_at	ITGB4	4.658	0.005	0.000848403	0.175	4.565	0.005	0.0620067	0.22	4.673	0.006	0.00461104	0.228	Not in sex-specific list	No	Yes
214293_at	SEPTIN11	9.678	-0.009	2.38426e-07	0.356	9.736	-0.008	0.00279649	0.437	9.684	-0.01	8.74324e-05	0.38	Not in sex-specific list	No	Yes
214298_x_at	SEPTIN6	4.902	0.004	0.00179214	0.157	4.957	0.003	0.365986	0.077	4.847	0.005	0.00240308	0.255	Not in sex-specific list	No	Yes
214365_at	TPM3	6.879	-0.006	6.10523e-06	0.288	6.909	-0.005	0.039781	0.254	6.903	-0.008	4.63286e-05	0.404	Not in sex-specific list	No	Yes
214436_at	FBXL2	8.953	-0.005	0.000162298	0.214	8.972	-0.004	0.0265659	0.284	8.972	-0.006	0.00313264	0.244	Not in sex-specific list	No	Yes
214449_s_at	RHOQ	5.788	0.008	2.07412e-05	0.261	5.695	0.007	0.0112715	0.345	5.795	0.009	0.000885742	0.294	Not in sex-specific list	No	Yes
214475_x_at	CAPN3	6.666	0.012	0.00506275	0.133	6.907	0.005	0.635793	0.03	6.384	0.02	0.000950186	0.292	Not in sex-specific list	No	Yes
214512_s_at	SUB1	9.45	-0.008	7.78534e-07	0.331	9.499	-0.007	0.0112828	0.345	9.46	-0.009	6.04459e-05	0.394	Not in sex-specific list	No	Yes
214553_s_at	ARPP19	11.488	-0.018	1.33902e-10	0.491	11.586	-0.017	0.000367319	0.551	11.492	-0.02	2.34749e-06	0.516	Not in sex-specific list	No	Yes
214616_at	H3C6	5.002	-0.002	0.124913	0.05	4.97	0	0.975296	0	5.082	-0.005	0.0139061	0.181	Not in sex-specific list	No	Yes
214671_s_at	ABR	8.614	-0.008	6.49332e-07	0.335	8.772	-0.009	0.00352802	0.423	8.54	-0.008	0.000363877	0.328	Not in sex-specific list	No	Yes
214694_at	MPRIP	6.076	-0.003	0.0648743	0.067	5.969	0	0.961371	0.001	6.211	-0.007	0.00671905	0.212	Not in sex-specific list	No	Yes
214710_s_at	CCNB1	5.946	-0.005	0.0122685	0.111	5.938	-0.004	0.388163	0.072	5.998	-0.007	0.0152667	0.177	Not in sex-specific list	No	Yes
214762_at	ATP6V1G2	11.563	-0.006	0.000230889	0.206	11.564	-0.005	0.0546977	0.23	11.609	-0.008	0.00229104	0.257	Not in sex-specific list	No	Yes
214772_at	KIAA1549L	8.039	-0.012	9.19902e-07	0.328	8.23	-0.013	0.00609352	0.388	7.964	-0.013	0.000238614	0.344	Not in sex-specific list	No	Yes
214799_at	NFASC	5.891	0.008	0.000483836	0.188	5.785	0.008	0.0368398	0.26	5.915	0.009	0.0110672	0.191	Not in sex-specific list	No	Yes
214823_at	ZNF204P	8.336	-0.005	0.0136679	0.108	8.295	-0.003	0.419955	0.065	8.413	-0.007	0.0150492	0.178	Not in sex-specific list	No	Yes
214844_s_at	DOK5	9.118	-0.007	5.0278e-06	0.292	9.327	-0.009	0.000124554	0.608	8.996	-0.006	0.0183155	0.169	Not in sex-specific list	No	Yes
214848_at	YWHAZ	6.882	-0.006	7.57316e-05	0.231	6.921	-0.006	0.0492009	0.238	6.884	-0.007	0.00200457	0.262	Not in sex-specific list	No	Yes
214909_s_at	DDAH2	6.569	0.004	0.0136446	0.108	6.669	0.001	0.807463	0.01	6.448	0.007	0.00211078	0.261	Not in sex-specific list	No	Yes
214923_at	ATP6V1D	5.495	-0.003	0.0536924	0.072	5.477	0	0.9053	0.003	5.567	-0.005	0.00228313	0.257	Not in sex-specific list	No	Yes
214930_at	SLITRK5	9.951	-0.008	1.52479e-07	0.365	9.916	-0.007	0.0113728	0.344	10.009	-0.01	2.96281e-05	0.423	Not in sex-specific list	No	Yes
214931_s_at	SRPK2	8.493	-0.007	1.90829e-05	0.263	8.52	-0.007	0.0372229	0.259	8.509	-0.009	0.000656832	0.306	Not in sex-specific list	No	Yes
214959_s_at	API5	7.456	-0.011	1.43021e-06	0.318	7.469	-0.009	0.0265659	0.284	7.496	-0.013	7.02397e-05	0.389	Not in sex-specific list	No	Yes
215120_s_at	SAMD4A	4.497	0.003	0.0703854	0.065	4.559	0	0.962821	0.001	4.393	0.006	0.00462746	0.228	Not in sex-specific list	No	Yes
215143_at	DPY19L2P2	8.555	-0.006	0.00222328	0.152	8.544	-0.004	0.118881	0.17	8.609	-0.008	0.0108214	0.192	Not in sex-specific list	No	Yes
215227_x_at	ACP1	8.453	-0.008	6.20452e-06	0.287	8.458	-0.007	0.0343214	0.265	8.491	-0.009	0.000191034	0.352	Not in sex-specific list	No	Yes
215245_x_at	FMR1	10.019	-0.003	0.0798858	0.062	9.886	0	0.966085	0	10.146	-0.006	0.0240923	0.157	Not in sex-specific list	No	Yes
215270_at	LFNG	5.13	0.003	0.08741	0.059	5.199	0	0.949928	0.001	5.012	0.007	0.00235058	0.256	Not in sex-specific list	No	Yes
215380_s_at	GGCT	9.78	-0.009	7.04211e-08	0.381	9.834	-0.008	0.0018488	0.463	9.781	-0.01	7.24279e-05	0.387	Not in sex-specific list	No	Yes
215531_s_at	GABRA5	7.74	-0.02	4.21642e-07	0.344	7.819	-0.019	0.0170573	0.317	7.737	-0.021	6.2306e-05	0.393	Not in sex-specific list	No	Yes
215543_s_at	LARGE1	9.231	-0.007	1.32035e-07	0.368	9.264	-0.006	0.00727752	0.375	9.266	-0.01	4.42162e-06	0.496	Not in sex-specific list	No	Yes
215684_s_at	ASCC2	5.459	0.004	0.029191	0.088	5.559	0.001	0.872449	0.005	5.328	0.008	0.00294133	0.246	Not in sex-specific list	No	Yes
215707_s_at	PRNP	10.792	-0.011	2.53733e-06	0.306	10.724	-0.007	0.0442301	0.246	10.909	-0.014	3.30668e-05	0.418	Not in sex-specific list	No	Yes
215728_s_at	ACOT7	8.807	-0.011	3.64334e-07	0.347	8.941	-0.012	0.00323592	0.427	8.755	-0.011	0.000319507	0.333	Not in sex-specific list	No	Yes
215807_s_at	PLXNB1	6.999	0.009	0.000348793	0.196	6.993	0.007	0.0519283	0.234	6.946	0.011	0.00501212	0.225	Not in sex-specific list	No	Yes
215913_s_at	GULP1	7.127	-0.009	3.55661e-06	0.299	7.196	-0.009	0.0085117	0.365	7.106	-0.01	0.00134875	0.278	Not in sex-specific list	No	Yes
215952_s_at	OAZ1	12.048	-0.007	2.88547e-08	0.402	12.086	-0.007	0.00238833	0.446	12.034	-0.007	8.16899e-05	0.383	Not in sex-specific list	No	Yes
215970_at	LOC100130331	4.899	-0.005	0.000733201	0.179	4.969	-0.004	0.0672449	0.214	4.894	-0.006	0.00467732	0.227	Not in sex-specific list	No	Yes
216125_s_at	RANBP9	7.915	-0.007	0.00103717	0.17	7.869	-0.005	0.276053	0.101	7.985	-0.009	0.00195426	0.263	Not in sex-specific list	No	Yes
216184_s_at	RIMS1	8.519	-0.009	3.36865e-05	0.25	8.533	-0.009	0.0368856	0.259	8.527	-0.01	0.00263139	0.251	Not in sex-specific list	No	Yes
216218_s_at	PLCL2	7.736	-0.017	1.6494e-08	0.411	7.864	-0.017	0.00920998	0.36	7.71	-0.019	1.61735e-06	0.527	Not in sex-specific list	No	Yes
216241_s_at	TCEA1	9.076	0.005	0.00102616	0.171	9.051	0.004	0.2052	0.126	9.042	0.007	0.00123119	0.282	Not in sex-specific list	No	Yes
216266_s_at	ARFGEF1	7.557	-0.009	1.38768e-06	0.319	7.548	-0.007	0.0416698	0.251	7.611	-0.011	2.35508e-05	0.432	Not in sex-specific list	No	Yes
216306_x_at	PTBP1	6.686	0.008	0.000381526	0.194	6.635	0.006	0.0536009	0.231	6.651	0.01	0.00270081	0.25	Not in sex-specific list	No	Yes
216307_at	DGKB	8.233	-0.017	5.92226e-10	0.47	8.549	-0.02	0.000143744	0.6	8.068	-0.016	2.23999e-05	0.433	Not in sex-specific list	No	Yes
216336_x_at	MT1E	8.605	0.011	0.000725742	0.179	8.636	0.01	0.198819	0.128	8.559	0.012	0.00329822	0.242	Not in sex-specific list	No	Yes
216360_x_at	RRP12	6.087	-0.005	0.000497269	0.188	6.106	-0.004	0.116985	0.171	6.113	-0.007	0.00244907	0.254	Not in sex-specific list	No	Yes
216604_s_at	SLC7A8	6.787	-0.006	0.0107293	0.114	6.808	-0.004	0.365141	0.077	6.847	-0.009	0.00927967	0.199	Not in sex-specific list	No	Yes
216620_s_at	ARHGEF10	7.246	0.007	0.000230889	0.206	7.306	0.004	0.102027	0.182	7.148	0.01	0.00106391	0.287	Not in sex-specific list	No	Yes
216940_x_at	YBX1	5.201	0.004	0.0701588	0.065	5.23	0	0.920484	0.002	5.096	0.007	0.00417672	0.232	Not in sex-specific list	No	Yes
216971_s_at	PLEC	5.957	0.004	0.0485613	0.075	6.1	0	0.977105	0	5.794	0.009	0.00469588	0.227	Not in sex-specific list	No	Yes
216985_s_at	STX3	4.742	-0.006	4.71779e-05	0.242	4.799	-0.006	0.0301501	0.274	4.721	-0.006	0.00334054	0.241	Not in sex-specific list	No	Yes
216996_s_at	FASTKD2	7.046	-0.006	0.000122301	0.22	7.061	-0.006	0.114689	0.173	7.05	-0.006	0.000952795	0.291	Not in sex-specific list	No	Yes
217008_s_at	GRM7	6.539	-0.008	2.92345e-06	0.303	6.555	-0.007	0.0103628	0.352	6.576	-0.01	0.000251683	0.341	Not in sex-specific list	No	Yes
217099_s_at	GEMIN4	6.603	-0.003	0.0327006	0.085	6.539	-0.001	0.846264	0.007	6.701	-0.006	0.00541006	0.221	Not in sex-specific list	No	Yes
217118_s_at	KIAA0930	8.483	0.009	1.47959e-06	0.317	8.4	0.009	0.00612157	0.387	8.493	0.01	0.000312422	0.334	Not in sex-specific list	No	Yes
217139_at	VDAC1	5.153	-0.005	0.00119789	0.167	5.242	-0.005	0.135542	0.159	5.137	-0.006	0.00238548	0.255	Not in sex-specific list	No	Yes
217140_s_at	VDAC1	9.818	-0.009	9.83441e-06	0.278	9.878	-0.009	0.0389818	0.256	9.801	-0.01	0.000423794	0.323	Not in sex-specific list	No	Yes
217188_s_at	ERG28	7.51	-0.007	6.83817e-08	0.381	7.603	-0.008	0.000433449	0.543	7.466	-0.007	0.000538765	0.314	Not in sex-specific list	No	Yes
217197_x_at	N4BP2L1	7.34	-0.004	0.0066814	0.126	7.217	-0.001	0.775927	0.013	7.461	-0.007	0.00118373	0.283	Not in sex-specific list	No	Yes
217280_x_at	GABRA5	6.968	-0.012	3.79669e-06	0.298	6.949	-0.01	0.0414009	0.251	7.042	-0.015	9.32578e-05	0.378	Not in sex-specific list	No	Yes
217430_x_at	COL1A1	7.255	-0.003	0.0570088	0.071	7.217	-0.001	0.913733	0.003	7.357	-0.007	0.0021709	0.259	Not in sex-specific list	No	Yes
217556_at	CLCN4	6.891	-0.013	1.19604e-06	0.322	6.872	-0.011	0.0496343	0.238	6.954	-0.016	1.81294e-05	0.438	Not in sex-specific list	No	Yes
217562_at	BRINP3	7.241	-0.008	4.22115e-05	0.245	7.389	-0.01	0.00411464	0.414	7.163	-0.008	0.015817	0.176	Not in sex-specific list	No	Yes
217585_at	NEBL	4.613	0.004	0.0255679	0.092	4.586	0.003	0.42681	0.063	4.577	0.006	0.0184179	0.169	Not in sex-specific list	No	Yes
217755_at	JPT1	8.643	-0.01	3.44648e-08	0.397	8.809	-0.011	0.00143542	0.483	8.558	-0.009	8.74413e-05	0.38	Not in sex-specific list	No	Yes
217781_s_at	ZNF106	9.063	0.006	5.34836e-06	0.291	9.076	0.006	0.0104519	0.351	9.049	0.006	0.00206039	0.261	Not in sex-specific list	No	Yes
217786_at	PRMT5	8.052	-0.006	1.5644e-07	0.364	8.061	-0.006	0.00608169	0.388	8.057	-0.007	0.00014933	0.361	Not in sex-specific list	No	Yes
217807_s_at	NOP53	10.177	0.009	4.06597e-05	0.246	10.061	0.008	0.0317869	0.27	10.189	0.01	0.000555882	0.312	Not in sex-specific list	No	Yes
217809_at	BZW2	9.052	-0.007	2.30641e-06	0.308	9.029	-0.005	0.016336	0.32	9.097	-0.008	0.000222337	0.347	Not in sex-specific list	No	Yes
217813_s_at	SPIN1	9.087	-0.01	0.000274072	0.202	9.1	-0.008	0.116013	0.172	9.155	-0.013	0.00134807	0.278	Not in sex-specific list	No	Yes
217819_at	GOLGA7	9.635	0.005	0.0010037	0.171	9.652	0.003	0.194128	0.13	9.56	0.008	0.000787015	0.299	Not in sex-specific list	No	Yes
217853_at	TNS3	9.06	0.007	0.0320847	0.086	9.245	0.002	0.839104	0.007	8.845	0.013	0.00356701	0.238	Not in sex-specific list	No	Yes
217859_s_at	SLC39A9	5.589	-0.005	0.000223715	0.207	5.567	-0.004	0.137478	0.158	5.612	-0.006	0.00229478	0.257	Not in sex-specific list	No	Yes
217883_at	MMADHC	10.087	-0.006	5.87132e-08	0.385	10.103	-0.006	0.00528599	0.398	10.1	-0.007	2.97175e-05	0.422	Not in sex-specific list	No	Yes
217908_s_at	DCAF6	10.114	-0.009	2.52023e-07	0.354	10.181	-0.009	0.00346393	0.423	10.124	-0.011	5.78809e-05	0.395	Not in sex-specific list	No	Yes
217919_s_at	MRPL42	7.236	-0.006	0.000165025	0.214	7.22	-0.004	0.0611665	0.221	7.284	-0.007	0.00214052	0.26	Not in sex-specific list	No	Yes
217930_s_at	TOLLIP	9.112	-0.012	1.17633e-07	0.371	9.289	-0.012	0.00650257	0.383	9.044	-0.012	1.35413e-05	0.45	Not in sex-specific list	No	Yes
217941_s_at	ERBIN	8.044	0.016	6.08816e-07	0.337	7.873	0.015	0.0109162	0.348	8.064	0.018	3.03786e-05	0.421	Not in sex-specific list	No	Yes
217976_s_at	DYNC1LI1	8.888	-0.009	7.31209e-07	0.333	8.944	-0.008	0.00663702	0.382	8.889	-0.01	0.000187491	0.353	Not in sex-specific list	No	Yes
217985_s_at	BAZ1A	4.059	0.01	1.52428e-05	0.268	4.094	0.006	0.0426474	0.249	3.946	0.014	6.53613e-05	0.391	Not in sex-specific list	No	Yes
218042_at	COPS4	10.239	-0.008	1.77491e-06	0.314	10.209	-0.006	0.0285343	0.278	10.309	-0.011	5.05022e-05	0.401	Not in sex-specific list	No	Yes
218063_s_at	CDC42EP4	5.105	0.003	0.0860782	0.06	5.055	0.001	0.735144	0.017	5.058	0.006	0.00934524	0.198	Not in sex-specific list	No	Yes
218085_at	CHMP5	9.312	-0.004	0.0126006	0.11	9.266	-0.002	0.543289	0.043	9.388	-0.006	0.00679655	0.212	Not in sex-specific list	No	Yes
218087_s_at	SORBS1	9.691	0.006	0.00201569	0.155	9.74	0.004	0.273447	0.102	9.603	0.009	0.00359506	0.238	Not in sex-specific list	No	Yes
218101_s_at	NDUFC2	10.868	-0.004	0.000159561	0.214	10.871	-0.003	0.0330846	0.267	10.896	-0.005	0.00273977	0.249	Not in sex-specific list	No	Yes
218111_s_at	CMAS	8.965	-0.008	0.000236838	0.205	8.992	-0.007	0.137541	0.158	8.986	-0.009	0.00102992	0.289	Not in sex-specific list	No	Yes
218118_s_at	TIMM23	8.176	-0.004	0.00774136	0.122	8.165	-0.003	0.288773	0.097	8.213	-0.005	0.0181912	0.169	Not in sex-specific list	No	Yes
218120_s_at	HMOX2	9.622	-0.009	1.68444e-07	0.362	9.736	-0.009	0.0107134	0.349	9.575	-0.009	1.32241e-05	0.451	Not in sex-specific list	No	Yes
218149_s_at	ZNF395	6.657	0.009	6.81617e-05	0.234	6.572	0.008	0.0264844	0.284	6.655	0.011	0.0018438	0.266	Not in sex-specific list	No	Yes
218159_at	DDRGK1	8.565	-0.006	6.55411e-06	0.286	8.692	-0.008	0.0022753	0.449	8.496	-0.006	0.00617738	0.216	Not in sex-specific list	No	Yes
218163_at	MCTS1	8.792	-0.009	1.64889e-06	0.315	8.868	-0.009	0.00736632	0.374	8.78	-0.01	0.000449886	0.321	Not in sex-specific list	No	Yes
218178_s_at	CHMP1B	9.101	-0.005	1.17855e-06	0.323	9.091	-0.004	0.0115961	0.342	9.144	-0.007	5.30538e-05	0.398	Not in sex-specific list	No	Yes
218209_s_at	RPRD1A	9.314	-0.01	1.38129e-07	0.367	9.309	-0.009	0.0141571	0.329	9.364	-0.012	1.48047e-05	0.447	Not in sex-specific list	No	Yes
218217_at	SCPEP1	7.018	0.006	3.4885e-07	0.348	6.927	0.007	0.00562725	0.393	7.054	0.006	0.000107979	0.373	Not in sex-specific list	No	Yes
218243_at	RUFY1	7.196	0.005	2.44832e-05	0.257	7.143	0.004	0.03484	0.264	7.193	0.006	0.000172414	0.356	Not in sex-specific list	No	Yes
218251_at	MID1IP1	7.928	0.01	1.71606e-05	0.265	7.922	0.009	0.0214072	0.301	7.875	0.013	0.000798516	0.298	Not in sex-specific list	No	Yes
218276_s_at	SAV1	5.84	0.006	0.000747709	0.178	5.8	0.005	0.0873507	0.194	5.817	0.008	0.00433837	0.23	Not in sex-specific list	No	Yes
218289_s_at	UBA5	8.14	-0.004	0.0066992	0.126	8.057	-0.001	0.704421	0.021	8.251	-0.007	0.000877016	0.295	Not in sex-specific list	No	Yes
218330_s_at	NAV2	6.93	0.008	0.000588958	0.184	6.902	0.007	0.0574716	0.227	6.892	0.01	0.00656512	0.213	Not in sex-specific list	No	Yes
218364_at	LRRFIP2	7.155	0.006	1.57315e-06	0.316	7.037	0.007	0.00112236	0.498	7.207	0.006	0.00140947	0.277	Not in sex-specific list	No	Yes
218374_s_at	C12orf4	6.774	-0.009	5.39772e-07	0.339	6.787	-0.008	0.0307519	0.273	6.808	-0.01	1.1554e-05	0.455	Not in sex-specific list	No	Yes
218398_at	MRPS30	7.607	-0.006	0.00128187	0.165	7.55	-0.004	0.297969	0.095	7.69	-0.009	0.00208366	0.261	Not in sex-specific list	No	Yes
218408_at	TIMM10	8.102	-0.004	0.00378761	0.14	8.118	-0.003	0.186666	0.134	8.121	-0.005	0.0120701	0.188	Not in sex-specific list	No	Yes
218437_s_at	LZTFL1	9.088	-0.007	1.80454e-06	0.313	9.108	-0.006	0.0070933	0.377	9.114	-0.008	0.000187491	0.353	Not in sex-specific list	No	Yes
218439_s_at	COMMD10	7.853	-0.007	2.85905e-05	0.254	7.827	-0.006	0.0559003	0.229	7.896	-0.008	0.000845901	0.296	Not in sex-specific list	No	Yes
218477_at	TMEM14A	10.516	-0.004	0.000287262	0.2	10.566	-0.004	0.039713	0.254	10.505	-0.005	0.00833222	0.203	Not in sex-specific list	No	Yes
218488_at	EIF2B3	7.958	-0.003	0.00388766	0.139	7.952	-0.002	0.340512	0.083	8.006	-0.005	0.00238819	0.255	Not in sex-specific list	No	Yes
218534_s_at	AGGF1	8.399	-0.004	0.00126386	0.166	8.391	-0.004	0.167072	0.143	8.43	-0.006	0.00683348	0.212	Not in sex-specific list	No	Yes
218573_at	MAGEH1	9.629	-0.004	0.000247886	0.204	9.631	-0.003	0.0869566	0.194	9.657	-0.005	0.00162731	0.271	Not in sex-specific list	No	Yes
218576_s_at	DUSP12	7.407	-0.004	0.0036546	0.14	7.348	-0.002	0.563751	0.04	7.488	-0.006	0.000772838	0.299	Not in sex-specific list	No	Yes
218588_s_at	FAM114A2	5.199	0.004	0.00141144	0.163	5.22	0.003	0.0832755	0.198	5.174	0.005	0.0226216	0.16	Not in sex-specific list	No	Yes
218597_s_at	CISD1	10.421	-0.005	0.0031643	0.144	10.4	-0.004	0.200464	0.127	10.474	-0.007	0.0112533	0.191	Not in sex-specific list	No	Yes
218625_at	NRN1	11.587	-0.007	0.000642519	0.182	11.63	-0.005	0.160947	0.146	11.623	-0.009	0.00104683	0.288	Not in sex-specific list	No	Yes
218638_s_at	SPON2	6.924	-0.006	0.0145597	0.106	6.924	-0.003	0.485911	0.052	6.998	-0.009	0.00645021	0.214	Not in sex-specific list	No	Yes
218644_at	PLEK2	6.099	-0.003	0.0959358	0.057	6.072	0	0.899367	0.003	6.191	-0.007	0.0164406	0.174	Not in sex-specific list	No	Yes
218648_at	CRTC3	7.711	0.006	1.36079e-06	0.32	7.637	0.006	0.000790356	0.515	7.739	0.006	0.00187967	0.265	Not in sex-specific list	No	Yes
218685_s_at	SMUG1	7.165	-0.006	0.000131606	0.219	7.262	-0.006	0.0138455	0.331	7.142	-0.007	0.00521122	0.223	Not in sex-specific list	No	Yes
218694_at	ARMCX1	9.005	-0.004	0.000162298	0.214	8.955	-0.002	0.0596069	0.224	9.058	-0.005	0.00228646	0.257	Not in sex-specific list	No	Yes
218773_s_at	MSRB2	9.051	0.005	0.000827484	0.176	9.079	0.003	0.202595	0.127	8.993	0.007	0.00216799	0.259	Not in sex-specific list	No	Yes
218788_s_at	SMYD3	8.579	-0.007	5.47353e-05	0.239	8.676	-0.007	0.0178356	0.314	8.558	-0.008	0.0023584	0.256	Not in sex-specific list	No	Yes
218813_s_at	SH3GLB2	8.625	-0.01	4.21642e-07	0.344	8.725	-0.01	0.0180441	0.313	8.596	-0.01	1.73257e-05	0.442	Not in sex-specific list	No	Yes
218876_at	TPPP3	7.334	0.01	0.000376235	0.194	7.373	0.007	0.131111	0.162	7.231	0.013	0.00158237	0.272	Not in sex-specific list	No	Yes
218897_at	TMEM177	7.051	-0.006	0.00232142	0.151	7.076	-0.004	0.169206	0.142	7.091	-0.008	0.00563742	0.22	Not in sex-specific list	No	Yes
218902_at	NOTCH1	6.776	0.006	0.000333965	0.197	6.81	0.004	0.19286	0.131	6.716	0.008	0.00106144	0.288	Not in sex-specific list	No	Yes
218915_at	NF2	8.296	0.004	0.00608254	0.128	8.387	0.002	0.557206	0.04	8.207	0.006	0.00484999	0.226	Not in sex-specific list	No	Yes
218919_at	ZFAND1	8.049	-0.005	0.00278542	0.147	7.954	-0.002	0.49288	0.051	8.163	-0.008	0.00157958	0.272	Not in sex-specific list	No	Yes
219006_at	NDUFAF4	8.051	-0.008	9.22417e-06	0.279	8.072	-0.007	0.0304841	0.273	8.087	-0.01	0.000204623	0.35	Not in sex-specific list	No	Yes
219077_s_at	WWOX	7.476	0.008	2.88599e-05	0.253	7.474	0.007	0.060198	0.223	7.455	0.009	0.000849912	0.296	Not in sex-specific list	No	Yes
219089_s_at	ZNF576	7.428	-0.003	0.00677242	0.125	7.367	-0.001	0.53461	0.044	7.51	-0.006	0.00356234	0.238	Not in sex-specific list	No	Yes
219093_at	PID1	8.123	-0.007	1.04768e-06	0.325	8.161	-0.007	0.00323592	0.427	8.106	-0.007	0.00159914	0.272	Not in sex-specific list	No	Yes
219115_s_at	IL20RA	3.992	0.004	0.00467906	0.134	4.105	0.002	0.580795	0.037	3.895	0.006	0.00342244	0.24	Not in sex-specific list	No	Yes
219176_at	MAIP1	7.941	-0.006	5.67686e-06	0.289	8.045	-0.007	0.00186417	0.462	7.884	-0.006	0.00699165	0.211	Not in sex-specific list	No	Yes
219196_at	SCG3	9.69	-0.005	0.00705248	0.124	9.705	-0.004	0.0642447	0.218	9.732	-0.007	0.0244241	0.156	Not in sex-specific list	No	Yes
219240_s_at	C10orf88	7.152	-0.007	1.43554e-06	0.318	7.129	-0.006	0.0160715	0.321	7.195	-0.008	0.000195978	0.351	Not in sex-specific list	No	Yes
219244_s_at	MRPL46	7.963	-0.005	0.000643181	0.182	7.913	-0.003	0.246096	0.111	8.018	-0.006	0.00201424	0.262	Not in sex-specific list	No	Yes
219260_s_at	ELP5	6.919	-0.006	6.02652e-06	0.288	6.936	-0.006	0.0304825	0.273	6.914	-0.006	0.000643071	0.307	Not in sex-specific list	No	Yes
219280_at	BRWD1	4.328	0.002	0.242822	0.032	4.356	-0.001	0.870497	0.005	4.237	0.005	0.0202218	0.164	Not in sex-specific list	No	Yes
219288_at	C3orf14	10.071	-0.004	0.0124823	0.11	10.099	-0.003	0.303663	0.093	10.095	-0.005	0.0163566	0.174	Not in sex-specific list	No	Yes
219302_s_at	CNTNAP2	5.808	-0.007	0.000255581	0.203	5.778	-0.006	0.165339	0.144	5.855	-0.009	0.00139374	0.277	Not in sex-specific list	No	Yes
219326_s_at	B3GNT2	6.982	-0.011	1.21023e-09	0.461	6.977	-0.01	0.00420741	0.413	7.031	-0.013	1.13862e-06	0.549	Not in sex-specific list	No	Yes
219365_s_at	CAMKV	9.385	-0.007	8.97266e-07	0.328	9.417	-0.007	0.00529619	0.397	9.402	-0.009	0.000179184	0.354	Not in sex-specific list	No	Yes
219378_at	NAA16	5.899	0.01	1.06585e-06	0.325	5.784	0.01	0.00643767	0.384	5.908	0.012	8.16899e-05	0.383	Not in sex-specific list	No	Yes
219387_at	CCDC88A	5.337	0.011	0.00196868	0.155	5.404	0.007	0.294403	0.096	5.192	0.016	0.00267942	0.25	Not in sex-specific list	No	Yes
219402_s_at	DERL1	6.771	-0.007	4.86418e-06	0.293	6.828	-0.007	0.00721538	0.376	6.743	-0.006	0.0028586	0.247	Not in sex-specific list	No	Yes
219423_x_at	TNFRSF25	5.515	0.009	0.000422109	0.191	5.452	0.008	0.0347201	0.264	5.497	0.011	0.00791073	0.206	Not in sex-specific list	No	Yes
219457_s_at	RIN3	5.248	0.002	0.215951	0.035	5.334	-0.001	0.702678	0.021	5.122	0.006	0.00895493	0.2	Not in sex-specific list	No	Yes
219520_s_at	WWC3	6.379	0.006	5.64849e-06	0.29	6.421	0.005	0.029207	0.276	6.33	0.007	0.000375691	0.327	Not in sex-specific list	No	Yes
219531_at	CEP72	5.807	-0.004	0.00901484	0.118	5.692	-0.001	0.655654	0.027	5.923	-0.007	0.0051558	0.223	Not in sex-specific list	No	Yes
219532_at	ELOVL4	8.928	-0.007	3.91342e-06	0.297	8.978	-0.007	0.0104039	0.352	8.915	-0.007	0.00102132	0.289	Not in sex-specific list	No	Yes
219633_at	TTPAL	7.008	-0.006	8.93577e-05	0.228	7.067	-0.006	0.0470636	0.242	7.005	-0.007	0.00186245	0.266	Not in sex-specific list	No	Yes
219671_at	HPCAL4	10.79	-0.007	7.32322e-06	0.284	10.845	-0.008	0.00208595	0.455	10.751	-0.006	0.0111625	0.191	Not in sex-specific list	No	Yes
219700_at	PLXDC1	7.051	-0.007	6.53947e-05	0.235	7.076	-0.006	0.0515876	0.234	7.059	-0.008	0.00219474	0.259	Not in sex-specific list	No	Yes
219911_s_at	SLCO4A1	6.126	0.011	0.00177713	0.158	6.035	0.009	0.0821599	0.199	6.11	0.013	0.0146135	0.179	Not in sex-specific list	No	Yes
219922_s_at	LTBP3	6.359	0.01	3.68107e-05	0.248	6.3	0.008	0.0367288	0.26	6.323	0.012	0.000391018	0.326	Not in sex-specific list	No	Yes
219979_s_at	HIKESHI	7.378	-0.008	2.36167e-05	0.258	7.404	-0.007	0.0268599	0.283	7.391	-0.009	0.00163172	0.271	Not in sex-specific list	No	Yes
219992_at	TAC3	8.479	-0.011	3.27109e-05	0.251	8.484	-0.009	0.0321339	0.269	8.544	-0.013	0.000749813	0.301	Not in sex-specific list	No	Yes
219998_at	LGALSL	6.484	-0.006	1.27327e-05	0.272	6.56	-0.005	0.0206391	0.303	6.484	-0.007	0.000116901	0.37	Not in sex-specific list	No	Yes
220025_at	TBR1	8.141	-0.005	0.110805	0.053	7.924	0.001	0.852801	0.006	8.384	-0.011	0.00389032	0.235	Not in sex-specific list	No	Yes
220030_at	STYK1	7.583	-0.016	2.17491e-08	0.407	7.842	-0.019	0.000286775	0.563	7.433	-0.015	0.000454245	0.32	Not in sex-specific list	No	Yes
220238_s_at	KLHL7	5.223	-0.007	0.000797127	0.177	5.147	-0.006	0.166647	0.143	5.283	-0.009	0.00840983	0.203	Not in sex-specific list	No	Yes
220294_at	KCNV1	8.51	-0.017	6.6019e-08	0.382	8.628	-0.016	0.00257641	0.442	8.515	-0.019	3.56467e-05	0.415	Not in sex-specific list	No	Yes
220321_s_at	CCDC121	4.564	0.003	0.00675908	0.125	4.596	0.001	0.551623	0.041	4.498	0.005	0.00162487	0.271	Not in sex-specific list	No	Yes
220359_s_at	ARPP21	11.518	-0.013	9.70747e-09	0.422	11.595	-0.013	0.00169982	0.47	11.492	-0.013	4.38196e-05	0.407	Not in sex-specific list	No	Yes
220456_at	SPTLC3	4.496	0.004	0.00953012	0.117	4.513	0.002	0.384346	0.073	4.442	0.006	0.00913848	0.199	Not in sex-specific list	No	Yes
220606_s_at	ADPRM	5.872	-0.003	0.0332123	0.085	5.775	0	0.937358	0.001	5.981	-0.006	0.00240865	0.255	Not in sex-specific list	No	Yes
220609_at	LOC202181	4.828	0.004	0.0179426	0.101	5.03	0	0.980158	0	4.655	0.008	0.00139987	0.277	Not in sex-specific list	No	Yes
220690_s_at	DHRS7B	7.326	-0.005	0.000283342	0.201	7.344	-0.005	0.0703786	0.211	7.333	-0.006	0.00665369	0.213	Not in sex-specific list	No	Yes
220731_s_at	NECAP2	6.202	0.005	0.00224576	0.152	6.124	0.005	0.185611	0.134	6.206	0.006	0.00344309	0.24	Not in sex-specific list	No	Yes
220753_s_at	CRYL1	7.582	0.008	6.34139e-06	0.287	7.479	0.008	0.00826142	0.366	7.627	0.008	0.00189386	0.265	Not in sex-specific list	No	Yes
220773_s_at	GPHN	7.949	-0.009	2.58032e-07	0.353	7.994	-0.009	0.0115386	0.343	7.941	-0.01	7.434e-05	0.387	Not in sex-specific list	No	Yes
220917_s_at	WDR19	7.127	0.006	0.000113771	0.222	6.911	0.008	0.00192092	0.46	7.239	0.005	0.0266262	0.152	Not in sex-specific list	No	Yes
221042_s_at	CLMN	4.798	0.004	0.0220298	0.096	4.889	0.001	0.769337	0.014	4.68	0.007	0.00652594	0.214	Not in sex-specific list	No	Yes
221082_s_at	NDRG3	9.471	-0.015	2.05293e-07	0.359	9.552	-0.013	0.0137773	0.331	9.504	-0.018	9.49858e-06	0.463	Not in sex-specific list	No	Yes
221097_s_at	KCNMB2	6.256	-0.005	0.000893632	0.174	6.196	-0.002	0.225634	0.118	6.345	-0.007	0.00114967	0.284	Not in sex-specific list	No	Yes
221114_at	AMBN	5.66	-0.003	0.0860481	0.06	5.699	-0.002	0.730784	0.018	5.707	-0.006	0.01303	0.184	Not in sex-specific list	No	Yes
221268_s_at	SGPP1	7.418	-0.006	0.00334874	0.143	7.301	-0.004	0.499772	0.05	7.532	-0.009	0.00185491	0.266	Not in sex-specific list	No	Yes
221295_at	CIDEA	6.362	-0.004	0.00611442	0.128	6.378	-0.003	0.176456	0.138	6.394	-0.006	0.0169607	0.172	Not in sex-specific list	No	Yes
221362_at	HTR5A	6.747	-0.006	7.19961e-05	0.233	6.777	-0.006	0.0181227	0.313	6.745	-0.007	0.00721685	0.209	Not in sex-specific list	No	Yes
221423_s_at	YIPF5	7.843	-0.009	1.33641e-06	0.32	7.877	-0.008	0.012838	0.336	7.859	-0.01	0.000162135	0.358	Not in sex-specific list	No	Yes
221425_s_at	ISCA1	8.051	-0.011	3.43171e-08	0.397	8.045	-0.01	0.0101628	0.354	8.103	-0.013	5.75607e-06	0.48	Not in sex-specific list	No	Yes
221447_s_at	GLT8D2	6.569	-0.005	0.0042068	0.137	6.558	-0.002	0.339629	0.083	6.641	-0.007	0.00189698	0.265	Not in sex-specific list	No	Yes
221449_s_at	ITFG1	10.945	-0.012	1.31851e-07	0.368	10.937	-0.01	0.0204238	0.304	11.016	-0.015	5.33964e-06	0.484	Not in sex-specific list	No	Yes
221471_at	SERINC3	10.647	-0.008	6.89346e-11	0.5	10.724	-0.008	0.000535343	0.531	10.622	-0.008	1.16689e-06	0.541	Not in sex-specific list	No	Yes
221482_s_at	ARPP19	12.237	-0.011	3.43171e-08	0.397	12.32	-0.011	0.000706505	0.519	12.228	-0.012	6.76168e-05	0.39	Not in sex-specific list	No	Yes
221547_at	PRPF18	7.338	-0.005	0.000371725	0.194	7.339	-0.004	0.109484	0.176	7.358	-0.006	0.00439489	0.23	Not in sex-specific list	No	Yes
221556_at	CDC14B	6.869	0.006	0.0145659	0.106	6.91	0.003	0.516295	0.047	6.769	0.009	0.00784313	0.206	Not in sex-specific list	No	Yes
221696_s_at	STYK1	6.606	-0.01	4.21642e-07	0.344	6.712	-0.01	0.00614746	0.387	6.594	-0.011	5.05022e-05	0.401	Not in sex-specific list	No	Yes
221702_s_at	TM2D3	10.696	-0.004	0.000534884	0.186	10.639	-0.002	0.194869	0.13	10.764	-0.006	0.00161364	0.271	Not in sex-specific list	No	Yes
221725_at	WASF2	6.514	0.007	1.19981e-05	0.273	6.382	0.008	0.00505297	0.401	6.586	0.006	0.00651863	0.214	Not in sex-specific list	No	Yes
221727_at	SUB1	10.743	-0.007	3.17217e-05	0.251	10.843	-0.006	0.0136052	0.332	10.728	-0.008	0.00084597	0.296	Not in sex-specific list	No	Yes
221737_at	GNA12	5.838	0.004	0.00169755	0.159	5.752	0.004	0.0522858	0.233	5.848	0.005	0.00772449	0.206	Not in sex-specific list	No	Yes
221747_at	TNS1	6.232	0.007	7.09677e-06	0.285	6.265	0.005	0.0165085	0.319	6.178	0.008	0.000530248	0.314	Not in sex-specific list	No	Yes
221774_x_at	SUPT20H	6.144	0.004	0.00235548	0.151	6.157	0.002	0.353493	0.08	6.089	0.006	0.00106805	0.287	Not in sex-specific list	No	Yes
221803_s_at	NRBF2	7.266	-0.009	8.39709e-06	0.281	7.34	-0.01	0.0137566	0.331	7.228	-0.009	0.00246201	0.254	Not in sex-specific list	No	Yes
221805_at	NEFL	12.93	-0.008	0.0028383	0.147	12.793	-0.004	0.493892	0.051	13.09	-0.012	0.0015347	0.273	Not in sex-specific list	No	Yes
221828_s_at	MVB12B	6.106	0.003	0.0668058	0.066	6.164	0	0.965283	0	5.992	0.007	0.0043729	0.23	Not in sex-specific list	No	Yes
221829_s_at	TNPO1	8.497	0.01	0.000476455	0.189	8.502	0.008	0.0799443	0.201	8.441	0.012	0.00646389	0.214	Not in sex-specific list	No	Yes
221891_x_at	HSPA8	12.89	-0.007	3.22489e-07	0.349	12.941	-0.007	0.00616086	0.387	12.879	-0.008	0.000158084	0.359	Not in sex-specific list	No	Yes
221893_s_at	ADCK2	7.745	-0.006	0.0021757	0.153	7.728	-0.004	0.25053	0.109	7.809	-0.008	0.0033977	0.24	Not in sex-specific list	No	Yes
221920_s_at	SLC25A37	5.134	0.007	0.0207705	0.097	5.202	0.004	0.434794	0.062	5.038	0.01	0.0317194	0.144	Not in sex-specific list	No	Yes
221922_at	GPSM2	6.538	0.006	0.00552347	0.13	6.651	0.003	0.462772	0.056	6.416	0.009	0.00605332	0.217	Not in sex-specific list	No	Yes
221934_s_at	DALRD3	7.76	-0.005	0.000146895	0.216	7.706	-0.003	0.102267	0.182	7.833	-0.007	0.000936699	0.292	Not in sex-specific list	No	Yes
221950_at	EMX2	6.808	0.013	0.00118915	0.167	6.819	0.011	0.135892	0.159	6.74	0.016	0.0101196	0.195	Not in sex-specific list	No	Yes
221960_s_at	RAB2A	6.524	-0.004	0.0467319	0.076	6.484	-0.002	0.780788	0.013	6.626	-0.008	0.00711098	0.21	Not in sex-specific list	No	Yes
222005_s_at	GNG3	12.049	-0.012	4.96243e-09	0.436	12.106	-0.011	0.00158585	0.475	12.065	-0.013	5.33964e-06	0.484	Not in sex-specific list	No	Yes
222095_s_at	FAM163A	6.042	-0.006	0.000166769	0.213	6.163	-0.006	0.0265659	0.284	6.013	-0.007	0.00186264	0.266	Not in sex-specific list	No	Yes
222380_s_at	PDCD6	5.563	0.01	0.000615367	0.183	5.394	0.01	0.04825	0.24	5.596	0.012	0.0067448	0.212	Not in sex-specific list	No	Yes
222393_s_at	NAA50	7.654	-0.009	8.12056e-06	0.282	7.604	-0.008	0.0476878	0.241	7.711	-0.011	0.000382755	0.327	Not in sex-specific list	No	Yes
222396_at	JPT1	9.458	-0.007	1.38768e-06	0.319	9.557	-0.007	0.00158585	0.475	9.429	-0.008	0.000715598	0.302	Not in sex-specific list	No	Yes
222407_s_at	ZNF106	8.603	0.005	0.0092063	0.118	8.815	0.001	0.885719	0.004	8.406	0.01	0.00212598	0.26	Not in sex-specific list	No	Yes
222408_s_at	YPEL5	9.827	-0.005	0.000609653	0.183	9.706	-0.003	0.352837	0.08	9.928	-0.007	0.00121459	0.282	Not in sex-specific list	No	Yes
222414_at	KMT2C	6.534	0.006	0.0194176	0.099	6.66	0.003	0.595652	0.035	6.394	0.01	0.0157964	0.176	Not in sex-specific list	No	Yes
222459_at	AKIRIN1	8.291	-0.005	0.00476146	0.134	8.25	-0.003	0.298147	0.095	8.364	-0.007	0.00819849	0.204	Not in sex-specific list	No	Yes
222465_at	RSL24D1	9.549	-0.006	2.81482e-05	0.254	9.584	-0.005	0.0272426	0.282	9.579	-0.008	0.000287422	0.337	Not in sex-specific list	No	Yes
222466_s_at	MRPL42	6.882	-0.003	0.0123038	0.11	6.897	-0.002	0.289201	0.097	6.919	-0.005	0.00896776	0.2	Not in sex-specific list	No	Yes
222479_s_at	DYNC1LI1	8.489	-0.007	2.35095e-06	0.308	8.456	-0.005	0.0272426	0.282	8.561	-0.01	4.5359e-05	0.405	Not in sex-specific list	No	Yes
222500_at	PPIL1	8.153	-0.007	1.9499e-05	0.262	8.301	-0.009	0.00117417	0.495	8.07	-0.006	0.018151	0.169	Not in sex-specific list	No	Yes
222502_s_at	UFM1	7.137	-0.008	4.70158e-05	0.242	7.134	-0.007	0.0268599	0.283	7.161	-0.009	0.00374167	0.236	Not in sex-specific list	No	Yes
222513_s_at	SORBS1	8.679	0.005	0.00149684	0.162	8.693	0.004	0.15516	0.149	8.64	0.006	0.00884306	0.201	Not in sex-specific list	No	Yes
222530_s_at	MKKS	8.161	-0.008	7.85858e-05	0.23	8.156	-0.007	0.0625579	0.22	8.208	-0.01	0.0014168	0.277	Not in sex-specific list	No	Yes
222558_at	RPRD1A	7.659	-0.009	4.12971e-06	0.296	7.71	-0.009	0.028974	0.277	7.647	-0.01	0.000301182	0.335	Not in sex-specific list	No	Yes
222589_at	NLK	11.089	-0.009	5.07147e-08	0.388	11.116	-0.008	0.00256634	0.442	11.112	-0.011	3.58066e-05	0.415	Not in sex-specific list	No	Yes
222590_s_at	NLK	8.892	-0.012	1.58781e-05	0.267	8.97	-0.012	0.0369062	0.259	8.873	-0.012	0.000781727	0.299	Not in sex-specific list	No	Yes
222594_s_at	SPATS2	6.951	-0.005	4.91934e-06	0.293	6.982	-0.005	0.0070933	0.377	6.957	-0.006	0.000761969	0.3	Not in sex-specific list	No	Yes
222613_at	C12orf4	8.153	-0.008	5.01849e-06	0.292	8.229	-0.007	0.0334231	0.267	8.143	-0.009	6.67266e-05	0.391	Not in sex-specific list	No	Yes
222632_s_at	LZTFL1	7.469	-0.011	6.05368e-08	0.384	7.552	-0.012	0.00155342	0.477	7.444	-0.012	0.000179184	0.354	Not in sex-specific list	No	Yes
222646_s_at	ERO1A	6.105	-0.004	0.0145027	0.106	6.024	-0.002	0.665496	0.026	6.191	-0.006	0.00323184	0.242	Not in sex-specific list	No	Yes
222651_s_at	TRPS1	6.971	0.006	0.00319971	0.144	7.056	0.003	0.285872	0.098	6.88	0.008	0.00929138	0.199	Not in sex-specific list	No	Yes
222735_at	TMEM38B	4.926	0.008	0.000802936	0.177	4.921	0.006	0.160975	0.146	4.866	0.01	0.0023901	0.255	Not in sex-specific list	No	Yes
222775_s_at	MRPL35	7.988	-0.005	1.78727e-05	0.264	7.981	-0.004	0.0330846	0.268	8.018	-0.006	0.000619863	0.308	Not in sex-specific list	No	Yes
222778_s_at	NSD2	7.9	-0.003	0.00107147	0.17	7.887	-0.002	0.225145	0.118	7.945	-0.005	0.00121562	0.282	Not in sex-specific list	No	Yes
222819_at	CTPS2	5.523	0.005	0.00111219	0.169	5.462	0.005	0.0998514	0.183	5.517	0.007	0.00527777	0.222	Not in sex-specific list	No	Yes
222826_at	BLOC1S6	8.649	-0.012	1.56277e-07	0.364	8.678	-0.012	0.0080713	0.368	8.664	-0.014	7.434e-05	0.387	Not in sex-specific list	No	Yes
222867_s_at	MED31	8.401	-0.005	0.000157364	0.215	8.458	-0.005	0.0162222	0.32	8.383	-0.005	0.0121358	0.187	Not in sex-specific list	No	Yes
222870_s_at	B3GNT2	7.791	-0.01	4.96243e-09	0.436	7.791	-0.009	0.00458146	0.407	7.822	-0.011	4.8557e-06	0.493	Not in sex-specific list	No	Yes
222880_at	AKT3	7.867	-0.011	0.00016544	0.213	7.959	-0.011	0.106573	0.178	7.87	-0.013	0.000782355	0.299	Not in sex-specific list	No	Yes
222894_x_at	NDUFAF5	7.916	-0.008	1.06283e-05	0.276	7.889	-0.006	0.041764	0.25	7.968	-0.009	0.000356628	0.329	Not in sex-specific list	No	Yes
222983_s_at	PAIP2	10.654	-0.005	0.00110032	0.169	10.599	-0.003	0.308127	0.092	10.725	-0.007	0.00173402	0.268	Not in sex-specific list	No	Yes
222990_at	UBQLN1	11.106	-0.008	1.57315e-06	0.316	11.102	-0.006	0.0415366	0.251	11.172	-0.011	8.3463e-06	0.467	Not in sex-specific list	No	Yes
223010_s_at	OCIAD1	11.581	-0.009	3.02002e-07	0.351	11.537	-0.006	0.0185968	0.311	11.671	-0.012	8.43968e-06	0.466	Not in sex-specific list	No	Yes
223021_x_at	VTA1	8.075	-0.011	4.96243e-09	0.435	8.194	-0.012	0.000932571	0.507	8.012	-0.011	5.26387e-05	0.398	Not in sex-specific list	No	Yes
223063_at	C1orf198	8.345	0.01	5.99597e-05	0.237	8.263	0.009	0.0306898	0.273	8.334	0.012	0.00133691	0.279	Not in sex-specific list	No	Yes
223090_x_at	VEZT	7.915	-0.004	0.000632095	0.182	7.84	-0.003	0.348062	0.081	7.984	-0.006	0.00081537	0.297	Not in sex-specific list	No	Yes
223134_at	BBX	6.6	0.01	1.2781e-05	0.272	6.6	0.008	0.0231031	0.294	6.543	0.012	0.000492566	0.317	Not in sex-specific list	No	Yes
223135_s_at	BBX	7.053	0.007	1.45077e-06	0.318	6.999	0.007	0.00627051	0.386	7.05	0.008	0.000248394	0.342	Not in sex-specific list	No	Yes
223140_s_at	DHX36	8.012	-0.004	0.018213	0.1	7.947	-0.001	0.739828	0.017	8.115	-0.007	0.00378415	0.236	Not in sex-specific list	No	Yes
223145_s_at	AKIRIN2	9.008	-0.007	2.57951e-05	0.256	9.08	-0.007	0.0306275	0.273	8.993	-0.007	0.000942357	0.292	Not in sex-specific list	No	Yes
223151_at	DCUN1D5	8.027	-0.006	8.36356e-09	0.425	8.094	-0.007	7.32141e-05	0.634	7.985	-0.006	0.000698055	0.303	Not in sex-specific list	No	Yes
223156_at	MRPS23	8.417	-0.007	1.49626e-06	0.317	8.487	-0.008	0.00277877	0.438	8.382	-0.007	0.0022683	0.257	Not in sex-specific list	No	Yes
223174_at	BTBD10	10.003	-0.006	9.47245e-06	0.278	10.016	-0.005	0.00942802	0.358	10.03	-0.007	0.000608045	0.309	Not in sex-specific list	No	Yes
223190_s_at	KMT2E	7.911	0.005	0.00312828	0.144	7.932	0.003	0.301345	0.094	7.846	0.007	0.00306587	0.245	Not in sex-specific list	No	Yes
223192_at	SLC25A28	7.792	0.005	8.69206e-06	0.28	7.737	0.005	0.0215831	0.299	7.793	0.006	0.000217382	0.347	Not in sex-specific list	No	Yes
223229_at	UBE2T	7.976	-0.008	3.61374e-05	0.248	8.033	-0.006	0.0247945	0.289	8.017	-0.011	0.000204623	0.35	Not in sex-specific list	No	Yes
223243_s_at	EDEM3	7.261	-0.004	0.0133351	0.108	7.267	-0.003	0.319878	0.088	7.297	-0.006	0.0235645	0.158	Not in sex-specific list	No	Yes
223247_at	MED10	8.178	-0.004	0.000313089	0.199	8.118	-0.003	0.121827	0.168	8.227	-0.005	0.00488866	0.226	Not in sex-specific list	No	Yes
223263_s_at	FGFR1OP2	8.783	-0.011	0.000128132	0.219	8.784	-0.009	0.0882806	0.193	8.857	-0.014	0.00100777	0.29	Not in sex-specific list	No	Yes
223328_at	ARMC10	9.038	-0.005	0.000248576	0.204	9.045	-0.004	0.0774196	0.203	9.058	-0.006	0.00374167	0.236	Not in sex-specific list	No	Yes
223334_at	TMEM126A	9.587	-0.005	1.44363e-05	0.269	9.649	-0.006	0.00985548	0.355	9.561	-0.005	0.0035045	0.239	Not in sex-specific list	No	Yes
223340_at	ATL1	11.414	-0.005	2.04944e-06	0.311	11.425	-0.005	0.00693935	0.379	11.432	-0.006	0.000393243	0.326	Not in sex-specific list	No	Yes
223349_s_at	BOK	6.647	0.007	0.00656892	0.126	6.728	0.004	0.530808	0.045	6.516	0.011	0.00237352	0.255	Not in sex-specific list	No	Yes
223374_s_at	B3GALNT1	8.758	-0.008	1.26718e-06	0.321	8.779	-0.007	0.0241071	0.292	8.796	-0.01	2.73546e-05	0.425	Not in sex-specific list	No	Yes
223461_at	TBC1D7	7.726	-0.007	0.000802936	0.177	7.671	-0.005	0.14762	0.153	7.818	-0.01	0.00359911	0.238	Not in sex-specific list	No	Yes
223519_at	MAP3K20	5	0.01	0.000103417	0.224	5.027	0.008	0.104166	0.18	4.939	0.012	0.00113288	0.285	Not in sex-specific list	No	Yes
223526_at	C18orf21	7.212	-0.004	0.000348793	0.196	7.195	-0.003	0.120612	0.169	7.24	-0.005	0.00362235	0.238	Not in sex-specific list	No	Yes
223527_s_at	CDADC1	6.19	-0.004	0.0170045	0.102	6.067	-0.001	0.785958	0.012	6.293	-0.006	0.00280451	0.248	Not in sex-specific list	No	Yes
223550_s_at	CA10	9.673	-0.013	7.14696e-12	0.536	9.77	-0.013	0.000252775	0.567	9.657	-0.014	4.0843e-07	0.584	Not in sex-specific list	No	Yes
223572_at	HHATL	7.916	0.011	0.0002107	0.208	8.015	0.009	0.081127	0.2	7.808	0.014	0.00384108	0.235	Not in sex-specific list	No	Yes
223650_s_at	NRBF2	7.126	-0.009	1.52749e-07	0.365	7.161	-0.01	0.00518382	0.4	7.106	-0.009	0.000301704	0.335	Not in sex-specific list	No	Yes
223664_x_at	BCL2L13	6.238	-0.004	0.0135345	0.108	6.241	-0.002	0.544845	0.042	6.295	-0.006	0.00226603	0.257	Not in sex-specific list	No	Yes
223672_at	SGIP1	8.484	-0.008	3.08139e-07	0.35	8.488	-0.007	0.012538	0.338	8.525	-0.01	2.8011e-05	0.424	Not in sex-specific list	No	Yes
223675_s_at	VEZT	6.846	-0.005	1.12675e-05	0.275	6.837	-0.004	0.0490253	0.239	6.868	-0.006	0.000406416	0.325	Not in sex-specific list	No	Yes
223708_at	C1QTNF4	9.415	-0.012	6.61394e-08	0.382	9.684	-0.015	0.00112236	0.498	9.252	-0.01	0.000403322	0.325	Not in sex-specific list	No	Yes
223721_s_at	DNAJC12	7.891	-0.006	0.000271647	0.202	7.939	-0.006	0.0309976	0.272	7.874	-0.006	0.0164493	0.174	Not in sex-specific list	No	Yes
223735_at	ARL6	6.315	-0.013	1.55057e-07	0.364	6.256	-0.011	0.0145853	0.327	6.376	-0.015	5.1244e-05	0.4	Not in sex-specific list	No	Yes
223741_s_at	TTYH2	8.031	0.012	8.08066e-05	0.23	8.005	0.01	0.0372933	0.259	7.974	0.015	0.00185701	0.266	Not in sex-specific list	No	Yes
223748_at	SLC4A11	4.933	0.005	0.00459485	0.135	5.034	0.002	0.599184	0.034	4.823	0.007	0.00174812	0.268	Not in sex-specific list	No	Yes
223821_s_at	SUSD4	7.172	-0.012	4.94798e-06	0.292	7.28	-0.012	0.0280877	0.279	7.147	-0.012	0.000187491	0.353	Not in sex-specific list	No	Yes
223894_s_at	AKTIP	9.286	-0.005	0.000372616	0.194	9.246	-0.003	0.164827	0.144	9.347	-0.007	0.00155609	0.273	Not in sex-specific list	No	Yes
223954_x_at	NECAB3	7.809	-0.004	0.00210583	0.154	7.826	-0.003	0.175152	0.139	7.837	-0.006	0.00524631	0.223	Not in sex-specific list	No	Yes
223960_s_at	CDIP1	9.368	0.005	5.00036e-06	0.292	9.344	0.005	0.0105357	0.351	9.376	0.005	0.00198596	0.263	Not in sex-specific list	No	Yes
223996_s_at	MRPL30	7.562	-0.007	4.70158e-05	0.242	7.638	-0.006	0.0167457	0.318	7.569	-0.009	0.000935159	0.292	Not in sex-specific list	No	Yes
224078_at	MFSD14C	7.177	-0.003	0.0173335	0.102	7.065	-0.001	0.867042	0.005	7.294	-0.006	0.00255744	0.252	Not in sex-specific list	No	Yes
224088_at	NMUR2	6.156	-0.005	0.0159635	0.104	6.117	-0.002	0.584758	0.037	6.263	-0.009	0.004672	0.227	Not in sex-specific list	No	Yes
224173_s_at	MRPL30	6.017	-0.008	0.000584805	0.184	6.093	-0.008	0.0948745	0.188	6.019	-0.01	0.00487338	0.226	Not in sex-specific list	No	Yes
224187_x_at	HSPA8	13.033	-0.008	1.32035e-07	0.368	13.094	-0.008	0.00432124	0.411	13.008	-0.008	0.000176316	0.355	Not in sex-specific list	No	Yes
224215_s_at	DLL1	5.329	0.01	5.47353e-05	0.239	5.327	0.008	0.0253289	0.287	5.276	0.012	0.00200554	0.262	Not in sex-specific list	No	Yes
224311_s_at	CAB39	7.749	-0.009	0.000710825	0.179	7.652	-0.006	0.305972	0.092	7.858	-0.012	0.00100171	0.29	Not in sex-specific list	No	Yes
224367_at	BEX2	11.444	-0.003	0.0183449	0.1	11.365	0	0.812925	0.01	11.535	-0.005	0.00508696	0.224	Not in sex-specific list	No	Yes
224368_s_at	NDRG3	10.386	-0.013	1.1971e-05	0.273	10.512	-0.012	0.0380792	0.257	10.387	-0.015	0.000117803	0.37	Not in sex-specific list	No	Yes
224377_s_at	RAB18	9.606	-0.004	0.000220351	0.207	9.542	-0.002	0.131294	0.162	9.673	-0.006	0.00149798	0.274	Not in sex-specific list	No	Yes
224395_s_at	RNF7	8.485	-0.003	0.000747635	0.178	8.415	-0.002	0.302904	0.093	8.557	-0.005	0.00146264	0.275	Not in sex-specific list	No	Yes
224408_at	MCHR2	7.336	-0.009	3.08139e-07	0.35	7.339	-0.007	0.00943506	0.358	7.403	-0.012	9.5378e-06	0.462	Not in sex-specific list	No	Yes
224409_s_at	TSSK6	4.942	0.003	0.136897	0.047	4.976	0	0.917795	0.002	4.833	0.007	0.00590436	0.218	Not in sex-specific list	No	Yes
224410_s_at	LMBR1	8.043	-0.012	1.5466e-07	0.364	8.05	-0.01	0.0191172	0.309	8.109	-0.015	5.50589e-06	0.483	Not in sex-specific list	No	Yes
224413_s_at	TM2D2	8.277	-0.007	5.01743e-08	0.389	8.285	-0.007	0.00411464	0.414	8.296	-0.008	4.31935e-05	0.408	Not in sex-specific list	No	Yes
224430_s_at	MTO1	6.894	-0.004	0.00133993	0.164	6.832	-0.003	0.30209	0.093	6.943	-0.005	0.00431589	0.231	Not in sex-specific list	No	Yes
224437_s_at	VTA1	8.743	-0.007	3.49558e-09	0.442	8.796	-0.007	0.000821286	0.512	8.738	-0.008	8.3463e-06	0.467	Not in sex-specific list	No	Yes
224522_s_at	DCAKD	7.14	0.005	0.0039172	0.139	7.163	0.003	0.381306	0.073	7.079	0.007	0.00282133	0.248	Not in sex-specific list	No	Yes
224562_at	WASF2	6.897	0.012	7.69308e-08	0.379	6.774	0.012	0.00168841	0.471	6.918	0.013	5.11783e-05	0.4	Not in sex-specific list	No	Yes
224575_at	BRK1	10.222	-0.005	3.42273e-08	0.398	10.234	-0.005	0.00526865	0.398	10.226	-0.005	3.28089e-05	0.419	Not in sex-specific list	No	Yes
224583_at	COTL1	6.657	0.012	7.96835e-08	0.378	6.575	0.012	0.00458146	0.407	6.664	0.014	4.32371e-05	0.408	Not in sex-specific list	No	Yes
224586_x_at	SUB1	11.046	-0.006	4.53367e-06	0.294	11.139	-0.007	0.00169982	0.471	11.015	-0.007	0.00212113	0.26	Not in sex-specific list	No	Yes
224587_at	SUB1	10.5	-0.012	3.44723e-09	0.443	10.657	-0.012	0.000234576	0.571	10.464	-0.013	5.02328e-06	0.488	Not in sex-specific list	No	Yes
224595_at	SLC44A1	7.192	0.011	0.000436652	0.191	6.999	0.011	0.00985548	0.355	7.248	0.012	0.0152667	0.177	Not in sex-specific list	No	Yes
224614_at	DYNC1LI2	8.146	0.006	0.00317621	0.144	8.176	0.003	0.361784	0.078	8.065	0.008	0.00226933	0.257	Not in sex-specific list	No	Yes
224624_at	LRRC8A	9.42	0.006	5.36199e-05	0.239	9.318	0.007	0.0332079	0.267	9.467	0.006	0.00259544	0.252	Not in sex-specific list	No	Yes
224641_at	FYTTD1	9.213	-0.005	2.28837e-06	0.309	9.273	-0.006	0.0019222	0.46	9.188	-0.005	0.00244222	0.254	Not in sex-specific list	No	Yes
224647_at	CCNY	8.899	-0.007	7.01878e-07	0.334	8.939	-0.007	0.00755588	0.373	8.908	-0.008	0.000123373	0.368	Not in sex-specific list	No	Yes
224649_x_at	CCNY	8.414	-0.011	7.79849e-08	0.378	8.526	-0.011	0.00179412	0.467	8.385	-0.012	9.60221e-05	0.377	Not in sex-specific list	No	Yes
224650_at	MAL2	10.647	-0.018	1.11852e-08	0.42	10.729	-0.015	0.000665089	0.522	10.704	-0.022	5.66926e-06	0.482	Not in sex-specific list	No	Yes
224659_at	SELENON	6.786	0.004	0.00346669	0.142	6.813	0.003	0.414592	0.066	6.728	0.006	0.00187196	0.265	Not in sex-specific list	No	Yes
224662_at	KIF5B	8.974	0.009	6.51395e-05	0.235	8.96	0.007	0.0425852	0.249	8.923	0.011	0.00101246	0.289	Not in sex-specific list	No	Yes
224681_at	GNA12	7.113	0.008	4.71026e-06	0.294	7.06	0.007	0.0214762	0.3	7.076	0.011	3.56467e-05	0.415	Not in sex-specific list	No	Yes
224704_at	TNRC6A	7.571	0.008	1.53715e-06	0.317	7.347	0.01	0.000433449	0.544	7.688	0.007	0.00288995	0.247	Not in sex-specific list	No	Yes
224736_at	CCAR1	7.792	0.008	5.77604e-05	0.238	7.691	0.007	0.0267458	0.283	7.806	0.009	0.00137068	0.278	Not in sex-specific list	No	Yes
224759_s_at	TMEM263	7.867	-0.004	4.12487e-05	0.245	7.828	-0.004	0.0824173	0.198	7.899	-0.005	0.00117609	0.283	Not in sex-specific list	No	Yes
224760_at	SP1	6.289	0.006	0.00408696	0.138	6.249	0.006	0.133878	0.161	6.278	0.008	0.0264044	0.153	Not in sex-specific list	No	Yes
224761_at	GNA13	8.438	0.01	0.000838915	0.176	8.367	0.009	0.118881	0.17	8.417	0.012	0.00509989	0.224	Not in sex-specific list	No	Yes
224782_at	ZMAT2	9.833	-0.007	1.5888e-07	0.363	9.88	-0.007	0.00157362	0.476	9.83	-0.008	0.000223205	0.346	Not in sex-specific list	No	Yes
224784_at	MLLT6	8.383	0.008	5.46171e-06	0.29	8.352	0.007	0.0215817	0.299	8.367	0.009	0.000342739	0.33	Not in sex-specific list	No	Yes
224787_s_at	RAB18	9.367	-0.003	0.00493138	0.133	9.262	-0.001	0.657188	0.027	9.461	-0.005	0.00281414	0.248	Not in sex-specific list	No	Yes
224794_s_at	CERCAM	6.881	0.012	1.29018e-05	0.272	6.835	0.011	0.0136385	0.332	6.848	0.014	0.000964253	0.291	Not in sex-specific list	No	Yes
224799_at	NDFIP2	8.59	-0.015	3.12183e-08	0.4	8.525	-0.012	0.0224419	0.297	8.705	-0.018	1.16689e-06	0.54	Not in sex-specific list	No	Yes
224802_at	NDFIP2	9.253	-0.011	1.18448e-07	0.37	9.205	-0.008	0.0126716	0.337	9.351	-0.014	7.19119e-06	0.472	Not in sex-specific list	No	Yes
224810_s_at	ANKRD13A	7.08	0.008	6.50858e-05	0.235	6.92	0.009	0.0086342	0.364	7.144	0.008	0.00659051	0.213	Not in sex-specific list	No	Yes
224832_at	DUSP16	6.672	0.005	0.00418873	0.137	6.745	0.002	0.53477	0.044	6.582	0.007	0.00146162	0.275	Not in sex-specific list	No	Yes
224862_at	GNAQ	9.601	-0.004	0.00336574	0.142	9.553	-0.003	0.116638	0.172	9.662	-0.006	0.0171389	0.172	Not in sex-specific list	No	Yes
224872_at	DIP2B	8.236	0.007	0.000105788	0.224	8.191	0.006	0.0495286	0.238	8.195	0.01	0.000503069	0.316	Not in sex-specific list	No	Yes
224881_at	VKORC1L1	8.315	-0.005	1.10784e-07	0.372	8.32	-0.005	0.0135267	0.333	8.319	-0.006	3.53002e-05	0.415	Not in sex-specific list	No	Yes
224900_at	ANKFY1	7.532	0.005	0.000471415	0.189	7.501	0.004	0.0354734	0.262	7.507	0.007	0.00380498	0.236	Not in sex-specific list	No	Yes
224909_s_at	PREX1	7.631	0.009	0.000248224	0.204	7.677	0.007	0.0461728	0.243	7.544	0.012	0.00367004	0.237	Not in sex-specific list	No	Yes
224925_at	PREX1	7.533	0.008	0.0002285	0.206	7.546	0.006	0.0797024	0.201	7.471	0.01	0.00221122	0.258	Not in sex-specific list	No	Yes
224951_at	CERS5	7.758	0.005	0.00011325	0.222	7.812	0.003	0.0852188	0.196	7.709	0.006	0.00240865	0.255	Not in sex-specific list	No	Yes
224953_at	YIPF5	8.895	-0.012	4.92056e-07	0.341	8.831	-0.009	0.0415366	0.251	9.01	-0.016	5.85479e-06	0.478	Not in sex-specific list	No	Yes
224955_at	TEAD1	6.744	0.011	0.000408042	0.192	6.699	0.009	0.0598764	0.223	6.718	0.012	0.00722987	0.209	Not in sex-specific list	No	Yes
224967_at	UGCG	9.172	-0.005	0.000619457	0.183	9.183	-0.004	0.179835	0.136	9.206	-0.007	0.00125158	0.281	Not in sex-specific list	No	Yes
224970_at	NFIA	7.624	0.01	9.08638e-06	0.279	7.663	0.007	0.0420873	0.25	7.531	0.013	0.000124964	0.367	Not in sex-specific list	No	Yes
224976_at	NFIA	7.304	0.007	0.000313258	0.199	7.251	0.007	0.0537298	0.231	7.303	0.008	0.00683348	0.212	Not in sex-specific list	No	Yes
224990_at	SMIM14	8.037	-0.004	0.00447553	0.136	8.01	-0.003	0.303172	0.093	8.092	-0.006	0.00742966	0.208	Not in sex-specific list	No	Yes
225023_at	GOPC	6.972	-0.004	0.0191491	0.099	6.898	-0.002	0.675144	0.025	7.062	-0.007	0.00618949	0.216	Not in sex-specific list	No	Yes
225048_at	PHF10	7.635	0.006	7.44477e-06	0.284	7.631	0.005	0.017302	0.316	7.605	0.008	0.000456447	0.32	Not in sex-specific list	No	Yes
225052_at	TMEM203	8.946	-0.007	4.21642e-07	0.344	8.987	-0.006	0.00654724	0.382	8.943	-0.007	0.000161477	0.358	Not in sex-specific list	No	Yes
225064_at	RABEP1	9.353	-0.008	1.32572e-07	0.368	9.422	-0.008	0.00234711	0.447	9.324	-0.008	0.000301704	0.335	Not in sex-specific list	No	Yes
225071_at	NUS1	7.204	-0.006	3.77453e-07	0.346	7.214	-0.005	0.0175622	0.315	7.217	-0.007	4.63286e-05	0.404	Not in sex-specific list	No	Yes
225077_at	CHD2	7.525	0.006	0.000393186	0.193	7.465	0.005	0.0280861	0.279	7.525	0.007	0.00812879	0.204	Not in sex-specific list	No	Yes
225085_at	USP40	5.781	0.006	0.000131576	0.219	5.778	0.005	0.0998408	0.184	5.743	0.008	0.000837304	0.296	Not in sex-specific list	No	Yes
225101_s_at	SNX14	8.122	-0.005	0.00304393	0.145	8.126	-0.004	0.129613	0.163	8.162	-0.007	0.0135587	0.182	Not in sex-specific list	No	Yes
225117_at	KANSL1	7.919	0.006	1.9499e-05	0.262	7.922	0.005	0.0304841	0.273	7.892	0.007	0.000955633	0.291	Not in sex-specific list	No	Yes
225150_s_at	RTKN	5.613	0.012	0.000292806	0.2	5.607	0.009	0.0935036	0.189	5.522	0.016	0.00162594	0.271	Not in sex-specific list	No	Yes
225186_at	RAPH1	7.095	-0.012	6.74777e-08	0.382	7.141	-0.011	0.0115319	0.343	7.11	-0.013	9.07931e-06	0.464	Not in sex-specific list	No	Yes
225219_at	SMAD5	6.694	0.01	0.000166769	0.213	6.624	0.009	0.0618979	0.221	6.69	0.011	0.00287227	0.247	Not in sex-specific list	No	Yes
225222_at	MFSD14A	8.873	-0.006	1.0638e-06	0.325	8.881	-0.006	0.00246257	0.445	8.856	-0.005	0.00387615	0.235	Not in sex-specific list	No	Yes
225259_at	RAB6B	9.645	-0.009	5.26646e-07	0.34	9.677	-0.008	0.0157297	0.322	9.675	-0.011	3.03786e-05	0.421	Not in sex-specific list	No	Yes
225270_at	NEO1	7.461	0.008	5.63939e-07	0.338	7.362	0.009	0.00290598	0.435	7.5	0.008	0.000517315	0.315	Not in sex-specific list	No	Yes
225273_at	WWC3	6.483	0.008	0.000336709	0.197	6.582	0.005	0.153579	0.15	6.346	0.012	0.00100171	0.29	Not in sex-specific list	No	Yes
225299_at	MYO5B	6.259	-0.003	0.088303	0.059	6.242	-0.001	0.863886	0.006	6.343	-0.006	0.0141186	0.181	Not in sex-specific list	No	Yes
225338_at	ZYG11B	10.037	-0.007	7.01966e-07	0.334	10.029	-0.006	0.0223798	0.297	10.061	-0.007	8.11294e-05	0.384	Not in sex-specific list	No	Yes
225391_at	LOC93622	8.414	-0.005	1.86538e-05	0.264	8.466	-0.005	0.0105457	0.35	8.401	-0.006	0.00282133	0.248	Not in sex-specific list	No	Yes
225442_at	DDR2	6.207	0.007	0.00144369	0.163	6.307	0.004	0.394547	0.07	6.087	0.01	0.00130037	0.28	Not in sex-specific list	No	Yes
225448_at	NAPG	9.187	-0.004	0.0101664	0.115	9.174	-0.003	0.437574	0.061	9.239	-0.006	0.00735941	0.209	Not in sex-specific list	No	Yes
225455_at	TADA1	7.853	-0.007	4.74615e-05	0.242	7.951	-0.007	0.0158746	0.322	7.817	-0.007	0.00401656	0.233	Not in sex-specific list	No	Yes
225474_at	MAGI1	8.703	-0.007	2.12681e-06	0.31	8.727	-0.006	0.00813554	0.368	8.736	-0.009	0.000106742	0.373	Not in sex-specific list	No	Yes
225490_at	ARID2	6.324	0.003	0.0399985	0.08	6.375	0.001	0.839926	0.007	6.242	0.006	0.00418488	0.232	Not in sex-specific list	No	Yes
225504_at	HMBOX1	7.924	0.006	2.69577e-05	0.255	7.843	0.006	0.0220557	0.298	7.935	0.007	0.000714616	0.303	Not in sex-specific list	No	Yes
225511_at	GPRC5B	8.002	0.011	0.000568301	0.185	7.986	0.01	0.105186	0.179	7.971	0.012	0.00748692	0.208	Not in sex-specific list	No	Yes
225522_at	AAK1	7.271	0.008	2.30679e-06	0.308	7.152	0.008	0.00581578	0.391	7.314	0.008	0.00058997	0.31	Not in sex-specific list	No	Yes
225545_at	EEF2K	6.717	0.006	3.3155e-05	0.25	6.681	0.007	0.0121232	0.34	6.755	0.006	0.0155946	0.176	Not in sex-specific list	No	Yes
225546_at	EEF2K	5.734	0.009	5.13125e-07	0.341	5.628	0.009	0.00535344	0.397	5.782	0.008	0.000344922	0.33	Not in sex-specific list	No	Yes
225558_at	GIT2	7.827	0.005	0.000158138	0.215	7.802	0.005	0.00695471	0.378	7.814	0.006	0.00769768	0.207	Not in sex-specific list	No	Yes
225627_s_at	CACHD1	6.996	0.007	0.00154243	0.161	7.006	0.005	0.260593	0.106	6.947	0.009	0.00288504	0.247	Not in sex-specific list	No	Yes
225660_at	SEMA6A	7.246	0.01	1.98723e-05	0.262	7.208	0.008	0.0367746	0.26	7.189	0.013	0.00013713	0.363	Not in sex-specific list	No	Yes
225665_at	MAP3K20	6.43	0.011	3.81122e-06	0.298	6.476	0.01	0.0445783	0.245	6.373	0.013	0.000187491	0.353	Not in sex-specific list	No	Yes
225689_at	POMGNT2	8.758	-0.006	3.00267e-05	0.252	8.787	-0.005	0.035154	0.263	8.764	-0.007	0.00133017	0.279	Not in sex-specific list	No	Yes
225717_at	LNPK	6.884	-0.009	0.000158697	0.214	6.828	-0.007	0.139642	0.157	6.97	-0.012	0.00101424	0.289	Not in sex-specific list	No	Yes
225726_s_at	PLEKHH1	7.591	0.018	9.08638e-06	0.279	7.468	0.017	0.0160562	0.321	7.579	0.021	0.000641665	0.307	Not in sex-specific list	No	Yes
225727_at	PLEKHH1	6.806	0.017	0.000127611	0.219	6.757	0.013	0.081119	0.2	6.718	0.021	0.00085104	0.296	Not in sex-specific list	No	Yes
225788_at	RRP36	7.854	-0.004	0.00187811	0.156	7.828	-0.003	0.237045	0.114	7.914	-0.006	0.00323869	0.242	Not in sex-specific list	No	Yes
225798_at	JAZF1	9.152	-0.009	3.73426e-08	0.395	9.186	-0.008	0.00627175	0.385	9.169	-0.01	9.5378e-06	0.462	Not in sex-specific list	No	Yes
225800_at	JAZF1	8.038	-0.013	2.40099e-08	0.405	8.055	-0.012	0.0135	0.333	8.082	-0.015	1.71418e-06	0.525	Not in sex-specific list	No	Yes
225810_at	MTMR10	7.514	0.007	0.00258512	0.149	7.497	0.006	0.142826	0.155	7.47	0.009	0.012487	0.186	Not in sex-specific list	No	Yes
225816_at	JADE1	6.276	0.007	2.55634e-05	0.256	6.272	0.007	0.0352552	0.263	6.266	0.008	0.00217902	0.259	Not in sex-specific list	No	Yes
225817_at	CGNL1	7.047	0.007	0.00980846	0.116	7.042	0.005	0.35069	0.08	6.979	0.01	0.0123246	0.187	Not in sex-specific list	No	Yes
225841_at	HENMT1	8.257	-0.007	3.09053e-05	0.252	8.273	-0.006	0.0385848	0.257	8.287	-0.009	0.000765438	0.3	Not in sex-specific list	No	Yes
225917_at	ATF7IP	7.213	0.005	0.000912365	0.174	7.129	0.005	0.081391	0.199	7.231	0.006	0.00802294	0.205	Not in sex-specific list	No	Yes
225921_at	NIN	7.64	0.006	0.000360096	0.195	7.515	0.007	0.0214762	0.3	7.687	0.006	0.013674	0.182	Not in sex-specific list	No	Yes
225930_at	NKIRAS1	9.832	-0.005	0.00312782	0.144	9.812	-0.003	0.233252	0.115	9.9	-0.008	0.0049373	0.225	Not in sex-specific list	No	Yes
225936_at	EID2	9.039	-0.006	0.00177568	0.158	9.046	-0.004	0.145289	0.154	9.085	-0.008	0.00660667	0.213	Not in sex-specific list	No	Yes
225959_s_at	ZNRF1	8.347	-0.008	1.2119e-07	0.37	8.497	-0.009	0.00112236	0.498	8.28	-0.008	0.00014933	0.361	Not in sex-specific list	No	Yes
226031_at	VPS50	9.359	-0.007	3.41141e-05	0.25	9.382	-0.005	0.0237682	0.293	9.386	-0.008	0.00100171	0.29	Not in sex-specific list	No	Yes
226046_at	MAPK8	7.316	-0.011	1.15934e-07	0.371	7.262	-0.008	0.0343718	0.265	7.42	-0.014	1.58214e-06	0.531	Not in sex-specific list	No	Yes
226047_at	IRAG1	7.973	0.011	0.000279853	0.201	7.865	0.011	0.0575892	0.227	8.02	0.011	0.00974893	0.197	Not in sex-specific list	No	Yes
226055_at	ARRDC2	6.925	0.005	0.000283002	0.201	6.912	0.003	0.0712682	0.21	6.885	0.007	0.000927892	0.293	Not in sex-specific list	No	Yes
226092_at	PALS1	8.191	0.005	0.000454309	0.19	8.192	0.003	0.140375	0.156	8.152	0.006	0.00158977	0.272	Not in sex-specific list	No	Yes
226114_at	ZNF436	7.37	-0.007	2.61983e-07	0.353	7.352	-0.006	0.0228155	0.296	7.395	-0.007	3.73557e-05	0.413	Not in sex-specific list	No	Yes
226167_at	SYT7	7.453	0.006	0.0019783	0.155	7.492	0.004	0.298676	0.094	7.369	0.009	0.00231509	0.256	Not in sex-specific list	No	Yes
226171_at	ZDHHC3	5.441	0.005	0.00137161	0.164	5.399	0.004	0.0669051	0.215	5.418	0.007	0.00729111	0.209	Not in sex-specific list	No	Yes
226184_at	FMNL2	9.84	0.008	0.00052553	0.186	9.94	0.005	0.154633	0.149	9.716	0.012	0.00259544	0.252	Not in sex-specific list	No	Yes
226250_at	ZBTB20	6.613	0.01	4.36509e-06	0.295	6.568	0.01	0.0135296	0.333	6.61	0.011	0.000808303	0.298	Not in sex-specific list	No	Yes
226252_at	ZBTB20	7.181	0.009	5.90459e-05	0.237	7.214	0.008	0.0272426	0.282	7.136	0.011	0.00438048	0.23	Not in sex-specific list	No	Yes
226255_at	ZBTB33	8.242	0.006	6.83602e-05	0.234	8.151	0.006	0.0348686	0.263	8.251	0.007	0.000585877	0.311	Not in sex-specific list	No	Yes
226265_at	QSER1	7.259	0.008	0.00156031	0.161	7.294	0.005	0.218734	0.121	7.175	0.011	0.00427611	0.231	Not in sex-specific list	No	Yes
226287_at	CCDC34	7.713	-0.007	7.19961e-05	0.233	7.798	-0.007	0.0216571	0.299	7.688	-0.008	0.00470899	0.227	Not in sex-specific list	No	Yes
226289_at	CAPRIN1	7.474	-0.009	8.16278e-05	0.23	7.562	-0.008	0.0526424	0.233	7.471	-0.01	0.00104175	0.288	Not in sex-specific list	No	Yes
226331_at	BBX	7.132	0.01	3.58358e-05	0.248	7.084	0.008	0.0151968	0.325	7.099	0.012	0.00127577	0.28	Not in sex-specific list	No	Yes
226339_at	TRUB1	8.607	-0.005	0.000200089	0.209	8.616	-0.004	0.0597825	0.223	8.635	-0.006	0.00224949	0.258	Not in sex-specific list	No	Yes
226341_at	OTUD6B-AS1	7.314	-0.006	0.0253951	0.092	7.205	-0.002	0.703021	0.021	7.466	-0.011	0.00966893	0.197	Not in sex-specific list	No	Yes
226374_at	CXADR	8.106	-0.008	1.56277e-07	0.364	8.149	-0.009	0.00145642	0.48	8.08	-0.008	0.000948548	0.292	Not in sex-specific list	No	Yes
226443_at	PABIR1	7.869	-0.006	6.49332e-07	0.336	7.914	-0.005	0.0068597	0.379	7.872	-0.006	6.76168e-05	0.39	Not in sex-specific list	No	Yes
226446_at	HES6	7.224	0.006	0.00161291	0.16	7.239	0.004	0.161646	0.146	7.185	0.007	0.0103699	0.194	Not in sex-specific list	No	Yes
226450_at	INSR	7.148	0.005	1.71817e-06	0.314	7.158	0.004	0.0437054	0.247	7.116	0.006	3.45472e-05	0.416	Not in sex-specific list	No	Yes
226490_at	NHSL1	5.565	0.012	0.000492496	0.188	5.659	0.008	0.174725	0.139	5.441	0.015	0.00263139	0.251	Not in sex-specific list	No	Yes
226547_at	KAT6A	8.079	0.007	0.000369402	0.195	8.004	0.006	0.0709164	0.21	8.071	0.009	0.00250414	0.253	Not in sex-specific list	No	Yes
226580_at	BRMS1L	9.495	-0.008	8.36356e-09	0.425	9.509	-0.007	0.0011845	0.494	9.517	-0.009	1.81294e-05	0.438	Not in sex-specific list	No	Yes
226586_at	ANKS6	6.322	0.005	1.16606e-05	0.274	6.312	0.004	0.0284972	0.278	6.305	0.006	0.000458591	0.32	Not in sex-specific list	No	Yes
226612_at	UBE2QL1	11.971	-0.006	3.8748e-05	0.247	12.007	-0.006	0.0137566	0.331	11.964	-0.007	0.00574355	0.219	Not in sex-specific list	No	Yes
226626_at	THOC2	6.79	0.006	0.00068439	0.18	6.688	0.006	0.0670891	0.214	6.801	0.008	0.00410021	0.233	Not in sex-specific list	No	Yes
226638_at	ARHGAP23	8.127	0.006	3.2559e-05	0.251	8.117	0.005	0.0224532	0.297	8.118	0.006	0.00322278	0.243	Not in sex-specific list	No	Yes
226651_at	HOMER1	9.094	-0.011	5.07147e-08	0.388	9.296	-0.012	0.00311268	0.431	8.999	-0.01	1.64614e-05	0.444	Not in sex-specific list	No	Yes
226656_at	CRTAP	7.527	0.006	1.91681e-06	0.312	7.541	0.004	0.0136385	0.332	7.484	0.007	0.000113029	0.371	Not in sex-specific list	No	Yes
226686_at	CISD2	7.141	-0.008	0.000222036	0.207	7.23	-0.008	0.0203933	0.304	7.125	-0.009	0.0088404	0.201	Not in sex-specific list	No	Yes
226692_at	SERF2	7.072	0.003	0.0661515	0.067	7.214	0	0.917964	0.002	6.932	0.006	0.0027856	0.249	Not in sex-specific list	No	Yes
226775_at	ENY2	7.473	-0.004	0.0132957	0.108	7.359	-0.001	0.816272	0.009	7.601	-0.007	0.00273977	0.249	Not in sex-specific list	No	Yes
226801_s_at	AIDA	9.156	0.009	2.40013e-05	0.258	9.065	0.008	0.0456877	0.244	9.154	0.011	0.000187094	0.353	Not in sex-specific list	No	Yes
226819_at	LSM11	6.378	-0.005	0.0142666	0.107	6.183	-0.001	0.924862	0.002	6.549	-0.008	0.000885742	0.294	Not in sex-specific list	No	Yes
226831_at	SLC25A46	9.684	-0.006	1.89161e-05	0.263	9.67	-0.005	0.0297817	0.275	9.717	-0.007	0.000917028	0.293	Not in sex-specific list	No	Yes
226881_at	GRPEL2	7.492	-0.004	0.051549	0.073	7.326	0	0.902353	0.003	7.66	-0.008	0.00467732	0.227	Not in sex-specific list	No	Yes
226907_at	PPP1R14C	8.679	-0.01	6.09981e-07	0.337	8.731	-0.009	0.00982757	0.356	8.709	-0.012	3.81641e-05	0.412	Not in sex-specific list	No	Yes
226913_s_at	SOX8	8.166	0.01	0.000830866	0.176	8.173	0.006	0.197218	0.129	8.052	0.014	0.000888074	0.294	Not in sex-specific list	No	Yes
226916_x_at	DPP9	6.414	0.003	0.0338046	0.084	6.496	0.001	0.888294	0.004	6.303	0.007	0.00462746	0.228	Not in sex-specific list	No	Yes
226927_at	C12orf73	7.311	-0.004	0.0143096	0.107	7.232	-0.001	0.659422	0.027	7.412	-0.007	0.0061411	0.216	Not in sex-specific list	No	Yes
226932_at	SSPN	6.311	0.012	0.00026306	0.203	6.403	0.009	0.142481	0.155	6.198	0.015	0.0022024	0.259	Not in sex-specific list	No	Yes
226963_at	BTF3L4	8.783	-0.009	1.56277e-07	0.364	8.705	-0.006	0.0428272	0.248	8.885	-0.012	2.56902e-06	0.513	Not in sex-specific list	No	Yes
226964_at	TTBK2	8.27	0.008	4.46514e-07	0.343	8.196	0.009	0.000334341	0.555	8.315	0.007	0.00347392	0.239	Not in sex-specific list	No	Yes
226981_at	KMT2A	7.641	0.01	2.44069e-07	0.355	7.494	0.011	0.00129435	0.488	7.708	0.01	0.000585877	0.31	Not in sex-specific list	No	Yes
227003_at	RAB28	8.226	0.004	0.0134481	0.108	8.314	0.001	0.723812	0.019	8.121	0.007	0.00368859	0.237	Not in sex-specific list	No	Yes
227004_at	CDKL5	9.77	-0.01	2.42367e-06	0.307	9.665	-0.007	0.0321363	0.269	9.903	-0.014	5.58951e-05	0.397	Not in sex-specific list	No	Yes
227012_at	SLC25A40	7.455	-0.006	0.0356637	0.083	7.299	-0.001	0.903197	0.003	7.638	-0.011	0.00375229	0.236	Not in sex-specific list	No	Yes
227018_at	DPP8	6.487	-0.005	0.00425659	0.137	6.311	-0.002	0.66445	0.026	6.637	-0.009	0.00171037	0.269	Not in sex-specific list	No	Yes
227068_at	PGK1	8.679	-0.006	0.00223713	0.152	8.628	-0.004	0.366637	0.076	8.779	-0.01	0.00155701	0.273	Not in sex-specific list	No	Yes
227082_at	ZBTB20	6.443	0.013	3.27553e-05	0.25	6.512	0.011	0.02589	0.286	6.347	0.016	0.00195426	0.263	Not in sex-specific list	No	Yes
227087_at	INPP4A	10.132	-0.005	3.07541e-06	0.302	10.17	-0.005	0.00438884	0.41	10.134	-0.006	0.00063536	0.307	Not in sex-specific list	No	Yes
227121_at	ZBTB20	7.34	0.011	7.62782e-05	0.231	7.319	0.011	0.0176123	0.315	7.325	0.012	0.00791489	0.205	Not in sex-specific list	No	Yes
227155_at	LMO4	9.261	-0.009	7.3484e-05	0.232	9.351	-0.008	0.039713	0.254	9.275	-0.011	0.000744649	0.301	Not in sex-specific list	No	Yes
227156_at	CASK	8.119	-0.007	5.07147e-08	0.388	8.143	-0.007	0.00225246	0.451	8.123	-0.008	0.000103711	0.374	Not in sex-specific list	No	Yes
227160_s_at	NDUFAF5	7.887	-0.007	7.93569e-05	0.23	7.931	-0.006	0.0253118	0.287	7.886	-0.008	0.00454906	0.228	Not in sex-specific list	No	Yes
227166_at	DNAJC18	6.913	-0.009	4.84905e-05	0.242	6.908	-0.008	0.0552656	0.23	6.952	-0.011	0.00146805	0.275	Not in sex-specific list	No	Yes
227176_at	SLC2A13	11.129	-0.007	1.40977e-07	0.367	11.234	-0.008	0.00127785	0.489	11.072	-0.006	0.000710793	0.303	Not in sex-specific list	No	Yes
227179_at	STAU2	8.392	-0.006	3.7009e-06	0.298	8.371	-0.005	0.0126716	0.337	8.441	-0.008	0.000245035	0.343	Not in sex-specific list	No	Yes
227180_at	ELOVL7	6.392	0.016	2.19346e-05	0.26	6.172	0.016	0.022179	0.298	6.449	0.018	0.000902846	0.293	Not in sex-specific list	No	Yes
227191_at	ITFG1	8.958	-0.008	0.000329745	0.197	8.984	-0.007	0.0250582	0.288	8.991	-0.01	0.00791232	0.206	Not in sex-specific list	No	Yes
227275_at	MEX3C	5.499	-0.003	0.156752	0.044	5.402	0.001	0.876871	0.005	5.631	-0.007	0.0191025	0.167	Not in sex-specific list	No	Yes
227334_at	USP54	7.843	0.01	3.02653e-06	0.302	7.78	0.008	0.0223673	0.297	7.811	0.012	4.16126e-05	0.409	Not in sex-specific list	No	Yes
227351_at	MOSMO	8.069	-0.005	0.00115963	0.168	8.019	-0.004	0.254567	0.108	8.13	-0.007	0.0035948	0.238	Not in sex-specific list	No	Yes
227461_at	STON2	7.176	0.013	0.00025258	0.204	7.122	0.012	0.109308	0.176	7.158	0.015	0.00235876	0.256	Not in sex-specific list	No	Yes
227528_s_at	KMT2D	5.939	0.008	2.44569e-05	0.257	5.901	0.008	0.0258039	0.286	5.937	0.009	0.00198431	0.263	Not in sex-specific list	No	Yes
227606_s_at	STAMBPL1	7.396	-0.006	0.00515613	0.132	7.445	-0.005	0.156447	0.148	7.413	-0.008	0.0210097	0.163	Not in sex-specific list	No	Yes
227658_s_at	PLEKHA3	6.917	-0.009	5.01743e-08	0.388	6.954	-0.009	0.00204281	0.457	6.909	-0.009	0.000162135	0.358	Not in sex-specific list	No	Yes
227669_at	MPC2	8.873	-0.007	5.34836e-06	0.291	8.895	-0.006	0.0191469	0.308	8.897	-0.009	0.000312422	0.334	Not in sex-specific list	No	Yes
227698_s_at	RAB40C	9.395	-0.007	3.3165e-06	0.3	9.461	-0.007	0.00518382	0.399	9.363	-0.007	0.00255296	0.252	Not in sex-specific list	No	Yes
227705_at	TCEAL7	10.845	-0.007	0.000834169	0.176	10.879	-0.006	0.144971	0.154	10.877	-0.009	0.00306587	0.245	Not in sex-specific list	No	Yes
227755_at	ERN1	4.778	0.004	0.0105227	0.114	4.742	0.003	0.292226	0.096	4.752	0.006	0.0127213	0.185	Not in sex-specific list	No	Yes
227771_at	LIFR	6.077	0.009	0.000596226	0.184	6.065	0.007	0.112086	0.174	6.04	0.01	0.00545422	0.221	Not in sex-specific list	No	Yes
227803_at	ENPP5	8.55	-0.007	0.0316361	0.086	8.522	-0.003	0.660169	0.027	8.663	-0.011	0.00766979	0.207	Not in sex-specific list	No	Yes
227824_at	PRKCB	8.934	-0.023	3.43171e-08	0.397	8.928	-0.019	0.00920512	0.36	9.062	-0.028	4.16629e-06	0.498	Not in sex-specific list	No	Yes
227830_at	GABRB3	9.893	-0.011	8.42202e-08	0.377	9.967	-0.011	0.00634426	0.385	9.895	-0.013	2.34144e-05	0.432	Not in sex-specific list	No	Yes
227960_s_at	FAHD1	7.945	-0.008	0.000122574	0.22	8.137	-0.009	0.0247457	0.289	7.871	-0.008	0.00278261	0.249	Not in sex-specific list	No	Yes
228019_s_at	MRPS18C	8.641	-0.004	0.00230038	0.152	8.588	-0.002	0.369281	0.076	8.719	-0.006	0.00207675	0.261	Not in sex-specific list	No	Yes
228109_at	RASGRF2	10.547	-0.016	4.08005e-07	0.345	10.511	-0.013	0.0128156	0.336	10.663	-0.02	3.19729e-05	0.42	Not in sex-specific list	No	Yes
228159_at	WDFY2	6.977	0.005	0.00321223	0.144	6.971	0.003	0.323427	0.087	6.94	0.006	0.00273977	0.249	Not in sex-specific list	No	Yes
228310_at	ENAH	7.756	0.007	1.82042e-05	0.264	7.758	0.005	0.0278991	0.28	7.716	0.008	0.000575333	0.311	Not in sex-specific list	No	Yes
228401_at	ATAD2	4.129	0.007	0.000248576	0.204	4.106	0.005	0.0395536	0.255	4.077	0.01	0.00151512	0.274	Not in sex-specific list	No	Yes
228488_at	TBC1D16	5.954	0.003	0.120305	0.051	6.057	-0.001	0.877256	0.005	5.808	0.007	0.00247135	0.254	Not in sex-specific list	No	Yes
228561_at	CDC37L1	7.583	-0.007	0.000118419	0.221	7.642	-0.007	0.0147442	0.326	7.552	-0.006	0.0184066	0.169	Not in sex-specific list	No	Yes
228598_at	DPP10	8.805	-0.008	2.49641e-06	0.307	8.907	-0.008	0.0102017	0.353	8.785	-0.009	0.000165508	0.357	Not in sex-specific list	No	Yes
228680_at	KIF3A	10.262	-0.004	0.00184708	0.157	10.252	-0.002	0.143754	0.155	10.31	-0.006	0.00411429	0.233	Not in sex-specific list	No	Yes
228695_at	VXN	9.317	-0.019	5.59912e-10	0.472	9.541	-0.021	0.000821286	0.512	9.207	-0.018	5.85479e-06	0.478	Not in sex-specific list	No	Yes
228701_at	VXN	7.746	-0.016	1.63964e-08	0.412	7.887	-0.017	0.00147204	0.48	7.686	-0.016	7.24075e-05	0.388	Not in sex-specific list	No	Yes
228709_at	TPR	6.195	-0.005	0.0032222	0.144	6.173	-0.003	0.303509	0.093	6.255	-0.007	0.00439489	0.23	Not in sex-specific list	No	Yes
228711_at	ZNF37A	5.819	0.005	0.0190965	0.099	5.909	0.002	0.730484	0.018	5.697	0.009	0.00328429	0.242	Not in sex-specific list	No	Yes
228745_at	SGTB	10.195	-0.006	0.000261504	0.203	10.139	-0.004	0.0802291	0.2	10.264	-0.008	0.00333372	0.241	Not in sex-specific list	No	Yes
228775_at	EMC3	8.342	-0.006	0.000165985	0.213	8.315	-0.005	0.0546977	0.23	8.405	-0.009	0.00187615	0.265	Not in sex-specific list	No	Yes
228795_at	PRKCB	9.721	-0.017	1.66099e-07	0.363	9.699	-0.014	0.0112162	0.346	9.827	-0.021	1.73257e-05	0.442	Not in sex-specific list	No	Yes
228851_s_at	ENSA	9.368	-0.017	3.08139e-07	0.35	9.618	-0.018	0.00498564	0.403	9.28	-0.018	8.13177e-05	0.383	Not in sex-specific list	No	Yes
228911_at	ADAMTS7	4.534	0.003	0.0604035	0.069	4.562	0.001	0.812402	0.01	4.451	0.006	0.0114002	0.19	Not in sex-specific list	No	Yes
228935_at	SLC4A8	7.133	-0.009	0.00256112	0.149	7.261	-0.007	0.188051	0.133	7.149	-0.012	0.00271224	0.25	Not in sex-specific list	No	Yes
229029_at	CAMK4	9.874	-0.014	4.96243e-09	0.435	9.94	-0.013	0.00166659	0.472	9.891	-0.016	5.85479e-06	0.478	Not in sex-specific list	No	Yes
229071_at	C17orf100	6.257	-0.005	0.0103538	0.115	6.309	-0.004	0.0917971	0.19	6.266	-0.006	0.0419722	0.131	Not in sex-specific list	No	Yes
229114_at	GAB1	5.654	0.014	2.0143e-05	0.262	5.583	0.013	0.0178088	0.314	5.615	0.017	0.000941743	0.292	Not in sex-specific list	No	Yes
229201_at	PAK3	9.991	-0.005	0.000139438	0.217	10.035	-0.005	0.0277655	0.28	9.994	-0.006	0.00392825	0.234	Not in sex-specific list	No	Yes
229256_at	PGM2L1	11.328	-0.007	3.44648e-08	0.397	11.339	-0.007	0.0011409	0.496	11.341	-0.008	0.000105872	0.374	Not in sex-specific list	No	Yes
229284_at	MAT2B	5.453	-0.003	0.164666	0.042	5.329	0.001	0.787122	0.012	5.596	-0.006	0.0114002	0.19	Not in sex-specific list	No	Yes
229300_at	RAB3C	10.853	-0.008	6.02578e-06	0.288	10.887	-0.007	0.0152666	0.324	10.865	-0.009	0.000620061	0.308	Not in sex-specific list	No	Yes
229342_at	NCBP3	5.168	0.006	0.0064816	0.126	5.286	0.003	0.548586	0.042	5.029	0.01	0.00379615	0.236	Not in sex-specific list	No	Yes
229355_at	UBE2D3	8.401	-0.007	1.12943e-05	0.275	8.428	-0.006	0.0216413	0.299	8.427	-0.008	0.000289986	0.337	Not in sex-specific list	No	Yes
229456_s_at	DDAH1	6.687	-0.004	0.0903163	0.058	6.57	0	0.968812	0	6.836	-0.008	0.0066737	0.213	Not in sex-specific list	No	Yes
229461_x_at	NEGR1	10.003	-0.01	6.4188e-05	0.235	10.134	-0.01	0.0141008	0.329	9.979	-0.011	0.0032538	0.242	Not in sex-specific list	No	Yes
229497_at	ANKDD1A	6.228	0.008	4.05927e-05	0.246	6.189	0.007	0.0276937	0.281	6.21	0.009	0.00146031	0.275	Not in sex-specific list	No	Yes
229499_at	CAPN13	6.643	-0.003	0.0623473	0.068	6.601	-0.001	0.863687	0.006	6.735	-0.006	0.00979053	0.196	Not in sex-specific list	No	Yes
229523_at	TMEM200C	7.398	-0.007	3.45068e-05	0.249	7.468	-0.007	0.00653977	0.383	7.376	-0.007	0.00618949	0.216	Not in sex-specific list	No	Yes
229526_at	AQP11	6.769	-0.005	0.00617734	0.128	6.806	-0.004	0.201703	0.127	6.791	-0.006	0.0142097	0.18	Not in sex-specific list	No	Yes
229574_at	TRA2A	5.854	0.01	0.00441762	0.136	5.844	0.008	0.149311	0.152	5.79	0.013	0.0202022	0.164	Not in sex-specific list	No	Yes
229664_at	MAPK8	8.483	-0.005	6.12789e-06	0.288	8.516	-0.005	0.0172441	0.316	8.484	-0.006	0.000592728	0.31	Not in sex-specific list	No	Yes
229676_at	MTPAP	7.257	-0.008	0.00430934	0.136	7.19	-0.004	0.300301	0.094	7.387	-0.012	0.00568472	0.219	Not in sex-specific list	No	Yes
229818_at	SVOP	9.783	-0.01	7.49475e-07	0.332	9.858	-0.01	0.00800437	0.369	9.78	-0.011	0.00014572	0.361	Not in sex-specific list	No	Yes
229849_at	WIPF3	8.759	0.008	5.34836e-06	0.291	8.664	0.009	0.00308114	0.432	8.805	0.008	0.00453046	0.229	Not in sex-specific list	No	Yes
230002_at	GPSM2	6.365	0.009	0.00183971	0.157	6.426	0.006	0.168662	0.142	6.262	0.012	0.00787352	0.206	Not in sex-specific list	No	Yes
230055_at	KHDC1	7.435	-0.005	0.00221044	0.152	7.431	-0.003	0.18931	0.132	7.491	-0.007	0.00306946	0.245	Not in sex-specific list	No	Yes
230091_at	SRPK2	6.74	-0.006	0.00460014	0.135	6.642	-0.003	0.553645	0.041	6.87	-0.01	0.00156608	0.273	Not in sex-specific list	No	Yes
230100_x_at	PAK1	9.869	-0.005	0.0127087	0.11	9.798	-0.002	0.617294	0.032	9.976	-0.008	0.0048073	0.226	Not in sex-specific list	No	Yes
230117_at	VSTM2A	9.723	-0.012	1.68304e-05	0.266	9.783	-0.011	0.0131427	0.334	9.736	-0.014	0.001879	0.265	Not in sex-specific list	No	Yes
230135_at	HHIP	6.609	0.016	2.84704e-05	0.254	6.538	0.014	0.0135887	0.332	6.582	0.018	0.00236978	0.255	Not in sex-specific list	No	Yes
230137_at	SMIM43	10.323	-0.012	1.14756e-05	0.274	10.259	-0.009	0.0272426	0.282	10.438	-0.016	0.000348125	0.33	Not in sex-specific list	No	Yes
230217_at	CLVS1	6.59	-0.009	1.40336e-06	0.319	6.673	-0.008	0.00830381	0.366	6.581	-0.01	0.00015805	0.359	Not in sex-specific list	No	Yes
230231_at	FGF14	8.154	-0.007	6.16597e-06	0.287	8.163	-0.005	0.0187981	0.31	8.196	-0.008	0.000133253	0.364	Not in sex-specific list	No	Yes
230258_at	GLIS3	4.949	0.007	0.000355381	0.195	5.004	0.005	0.11983	0.169	4.89	0.008	0.00464868	0.228	Not in sex-specific list	No	Yes
230263_s_at	DOCK5	5.122	0.019	8.58319e-06	0.281	5.031	0.018	0.00857472	0.364	5.123	0.021	0.00211734	0.26	Not in sex-specific list	No	Yes
230352_at	PRPS2	7.277	-0.011	0.00476146	0.134	7.18	-0.006	0.513407	0.048	7.468	-0.017	0.00120259	0.283	Not in sex-specific list	No	Yes
230389_at	FNBP1	6.025	0.011	0.000377564	0.194	5.911	0.011	0.0164808	0.319	6.048	0.012	0.0167241	0.173	Not in sex-specific list	No	Yes
230417_at	GALNT16	6.385	0.006	0.000275044	0.202	6.371	0.005	0.0117513	0.341	6.367	0.007	0.012246	0.187	Not in sex-specific list	No	Yes
230418_s_at	GALNT16	7.269	0.01	3.63787e-06	0.299	7.174	0.01	0.00232654	0.448	7.3	0.01	0.00236802	0.255	Not in sex-specific list	No	Yes
230447_at	FAXC	7.576	-0.007	0.000221206	0.207	7.512	-0.005	0.115882	0.172	7.656	-0.009	0.00203337	0.262	Not in sex-specific list	No	Yes
230495_at	LINC01102	6.377	-0.008	8.42873e-06	0.281	6.386	-0.007	0.0187956	0.31	6.392	-0.009	0.00127416	0.28	Not in sex-specific list	No	Yes
230629_s_at	EP400	5.211	0.006	0.0190659	0.099	5.265	0.002	0.699559	0.021	5.07	0.011	0.00262343	0.251	Not in sex-specific list	No	Yes
230640_at	FMNL3	5.191	0.004	0.00255535	0.149	5.171	0.003	0.193113	0.131	5.16	0.006	0.00414158	0.232	Not in sex-specific list	No	Yes
230773_at	ZNF385D	8.283	-0.008	2.49487e-05	0.257	8.404	-0.008	0.00275323	0.438	8.25	-0.008	0.00340992	0.24	Not in sex-specific list	No	Yes
230882_at	DLX6-AS1	7.034	-0.009	0.000170521	0.213	7.189	-0.009	0.00803046	0.369	6.996	-0.01	0.00649662	0.214	Not in sex-specific list	No	Yes
230883_at	NXPH2	6.629	-0.011	4.79444e-06	0.293	6.794	-0.012	0.0112175	0.346	6.562	-0.011	0.000713136	0.303	Not in sex-specific list	No	Yes
230968_at	HDAC9	7.912	-0.009	2.01065e-06	0.311	7.938	-0.008	0.0254055	0.287	7.932	-0.01	0.000115979	0.37	Not in sex-specific list	No	Yes
231045_x_at	SELENOH	9.619	-0.003	0.0196892	0.098	9.584	-0.001	0.624154	0.031	9.685	-0.005	0.00720459	0.21	Not in sex-specific list	No	Yes
231046_at	LINC01023	5.022	0.004	0.00732656	0.123	5.005	0.003	0.413302	0.066	4.974	0.007	0.00224119	0.258	Not in sex-specific list	No	Yes
231118_at	ANKRD35	6.826	0.005	0.000467679	0.189	6.844	0.004	0.212427	0.123	6.792	0.006	0.00123831	0.281	Not in sex-specific list	No	Yes
231249_at	SZT2	4.613	0.002	0.120108	0.051	4.676	0	0.915733	0.002	4.51	0.006	0.0077001	0.207	Not in sex-specific list	No	Yes
231438_x_at	CDH8	5.948	-0.008	8.30016e-06	0.281	5.986	-0.008	0.0353669	0.263	5.953	-0.009	0.000352133	0.329	Not in sex-specific list	No	Yes
231489_x_at	CREG2	11.639	-0.007	0.0118037	0.112	11.506	-0.002	0.771761	0.014	11.839	-0.013	0.00123897	0.281	Not in sex-specific list	No	Yes
231897_at	PTGR1	8.324	-0.008	0.00215519	0.153	8.327	-0.006	0.179564	0.137	8.385	-0.01	0.0068439	0.212	Not in sex-specific list	No	Yes
231918_s_at	GFM2	7.023	-0.011	6.6665e-07	0.335	7.118	-0.011	0.00819131	0.367	6.982	-0.011	0.00034737	0.33	Not in sex-specific list	No	Yes
231929_at	IKZF2	4.582	0.007	0.00129809	0.165	4.538	0.005	0.133974	0.16	4.534	0.01	0.00294133	0.246	Not in sex-specific list	No	Yes
231930_at	ELMOD1	11.459	-0.01	2.73121e-06	0.304	11.461	-0.007	0.0436462	0.247	11.53	-0.013	1.72268e-05	0.442	Not in sex-specific list	No	Yes
231967_at	PHF20L1	7.539	-0.006	1.548e-05	0.268	7.538	-0.005	0.0111475	0.347	7.558	-0.007	0.00236237	0.256	Not in sex-specific list	No	Yes
231980_at	DOK6	9.509	-0.012	8.15686e-09	0.426	9.67	-0.012	0.000172703	0.587	9.445	-0.012	6.69189e-05	0.39	Not in sex-specific list	No	Yes
231982_at	SMIM24	6.268	-0.005	0.0146262	0.106	6.471	-0.005	0.0676341	0.214	6.22	-0.006	0.0162266	0.174	Not in sex-specific list	No	Yes
232043_at	GNG7	5.237	0.004	0.0102755	0.115	5.269	0.001	0.590038	0.036	5.142	0.007	0.0011709	0.284	Not in sex-specific list	No	Yes
232053_x_at	RHBDD2	9.868	-0.01	6.49332e-07	0.335	9.966	-0.01	0.007769	0.371	9.833	-0.01	0.000222337	0.347	Not in sex-specific list	No	Yes
232067_at	FAXC	8	-0.007	0.00114738	0.168	7.848	-0.003	0.413079	0.066	8.141	-0.01	0.00148673	0.275	Not in sex-specific list	No	Yes
232082_x_at	SPRR3	5.136	-0.003	0.0669204	0.066	5.089	0	0.936975	0.001	5.233	-0.006	0.00751645	0.208	Not in sex-specific list	No	Yes
232129_s_at	LZTS2	5.703	0.002	0.28076	0.028	5.775	-0.001	0.684424	0.023	5.578	0.006	0.00391107	0.234	Not in sex-specific list	No	Yes
232269_x_at	METRN	8.363	0.006	8.9085e-05	0.228	8.314	0.006	0.0388706	0.256	8.354	0.007	0.00167996	0.27	Not in sex-specific list	No	Yes
232275_s_at	HS6ST3	8.236	-0.019	9.29346e-08	0.375	8.445	-0.02	0.00554635	0.394	8.171	-0.02	3.12621e-05	0.42	Not in sex-specific list	No	Yes
232349_x_at	DCAF6	8.492	-0.007	1.58651e-05	0.267	8.508	-0.006	0.0255052	0.286	8.536	-0.009	0.000239676	0.344	Not in sex-specific list	No	Yes
232353_s_at	STYXL1	7.054	0.003	0.0372117	0.082	7.115	0.001	0.709687	0.02	6.981	0.005	0.0178301	0.17	Not in sex-specific list	No	Yes
232390_at	NCAM2	4.744	-0.007	1.73078e-05	0.265	4.806	-0.008	0.0312132	0.271	4.707	-0.007	0.00172635	0.268	Not in sex-specific list	No	Yes
232553_at	PCYT1B	6.781	0.004	0.00223288	0.152	6.762	0.003	0.152653	0.15	6.755	0.006	0.00750224	0.208	Not in sex-specific list	No	Yes
232706_s_at	TRABD	7.266	0.005	0.00707637	0.124	7.179	0.004	0.28269	0.099	7.264	0.007	0.0044845	0.229	Not in sex-specific list	No	Yes
232785_at	RTL9	5.675	-0.004	0.0513589	0.073	5.618	-0.002	0.625636	0.031	5.772	-0.007	0.0346081	0.14	Not in sex-specific list	No	Yes
232806_s_at	FAM131A	7.965	-0.014	2.52023e-07	0.354	8.076	-0.014	0.0214293	0.3	7.948	-0.015	6.13939e-06	0.477	Not in sex-specific list	No	Yes
232811_x_at	PRICKLE1	6.178	-0.003	0.095333	0.057	6.063	0	0.954098	0.001	6.308	-0.006	0.00705373	0.21	Not in sex-specific list	No	Yes
233002_at	PPP4R4	8.602	-0.017	1.41609e-07	0.366	8.631	-0.015	0.0117798	0.341	8.64	-0.019	3.03786e-05	0.421	Not in sex-specific list	No	Yes
233059_at	KCNJ3	9.825	-0.004	0.0283514	0.089	9.771	-0.002	0.582479	0.037	9.912	-0.007	0.0182212	0.169	Not in sex-specific list	No	Yes
233117_at	MAPT	5.124	0.004	0.00448943	0.135	5.144	0.002	0.412296	0.067	5.072	0.006	0.00270081	0.25	Not in sex-specific list	No	Yes
233135_at	LINC01007	8.532	-0.014	5.12967e-08	0.387	8.598	-0.013	0.00526865	0.398	8.555	-0.017	1.54124e-05	0.446	Not in sex-specific list	No	Yes
233140_s_at	VIPAS39	6.754	-0.006	2.75295e-05	0.255	6.79	-0.005	0.0336409	0.266	6.758	-0.006	0.000929108	0.292	Not in sex-specific list	No	Yes
233220_at	GRIN3A	7.513	-0.008	1.02811e-05	0.277	7.538	-0.007	0.0287029	0.278	7.538	-0.009	0.000381315	0.327	Not in sex-specific list	No	Yes
233234_at	KCTD16	8.166	-0.014	1.17633e-07	0.371	8.132	-0.011	0.0214762	0.3	8.265	-0.018	5.02328e-06	0.489	Not in sex-specific list	No	Yes
233310_at	SSTR2	7.071	-0.006	0.000476612	0.189	7.033	-0.004	0.228671	0.117	7.132	-0.008	0.00110856	0.286	Not in sex-specific list	No	Yes
233344_x_at	WDR97	4.083	0.003	0.0545766	0.072	4.079	0.001	0.759201	0.015	4.017	0.006	0.00689982	0.211	Not in sex-specific list	No	Yes
233487_s_at	LRRC8A	6.914	0.006	5.34025e-05	0.239	6.906	0.006	0.0460391	0.243	6.897	0.007	0.00207388	0.261	Not in sex-specific list	No	Yes
233547_x_at	PDE1A	7.753	-0.014	2.60417e-06	0.305	7.692	-0.011	0.0433579	0.248	7.845	-0.017	9.14461e-05	0.379	Not in sex-specific list	No	Yes
233647_s_at	CDADC1	7.142	-0.004	0.00744672	0.123	7.047	-0.002	0.489626	0.051	7.23	-0.006	0.00992783	0.196	Not in sex-specific list	No	Yes
233813_at	PPP1R16B	5.473	0.007	0.000353066	0.196	5.414	0.007	0.0288994	0.277	5.466	0.009	0.00805786	0.205	Not in sex-specific list	No	Yes
233924_s_at	EXOC6	7.326	-0.011	3.21579e-08	0.399	7.316	-0.009	0.0144887	0.327	7.39	-0.014	1.79343e-06	0.523	Not in sex-specific list	No	Yes
233992_x_at	ZNF445	6.893	-0.003	0.145417	0.046	6.787	0.001	0.796151	0.011	7.028	-0.006	0.00514446	0.223	Not in sex-specific list	No	Yes
234024_at	CBLN4	9.275	-0.021	4.30808e-08	0.392	9.363	-0.018	0.011191	0.346	9.33	-0.025	2.34749e-06	0.516	Not in sex-specific list	No	Yes
234393_at	HDAC9	5.777	-0.006	0.000321459	0.198	5.925	-0.007	0.0253289	0.287	5.736	-0.007	0.00362235	0.238	Not in sex-specific list	No	Yes
234584_s_at	ATE1	6.555	-0.003	0.0551405	0.071	6.464	0	0.937508	0.001	6.672	-0.007	0.00977789	0.196	Not in sex-specific list	No	Yes
234660_s_at	DIS3	6.315	-0.004	0.011934	0.111	6.2	-0.002	0.621109	0.032	6.426	-0.007	0.00910021	0.2	Not in sex-specific list	No	Yes
234672_s_at	NDC1	7.917	-0.005	4.32949e-05	0.244	7.899	-0.003	0.0311334	0.272	7.973	-0.007	0.000203293	0.35	Not in sex-specific list	No	Yes
234716_at	ZIC1	5.085	0.002	0.389515	0.019	5.165	-0.002	0.496605	0.05	4.964	0.005	0.0271817	0.151	Not in sex-specific list	No	Yes
234773_x_at	LINC02504	5.652	-0.001	0.550239	0.01	5.487	0.003	0.239315	0.113	5.825	-0.006	0.0142291	0.18	Not in sex-specific list	No	Yes
234799_at	ADARB1	4.809	-0.002	0.354019	0.021	4.71	0.002	0.442624	0.06	4.948	-0.006	0.0240515	0.157	Not in sex-specific list	No	Yes
234915_s_at	DENR	6.853	-0.009	2.9217e-06	0.303	6.872	-0.009	0.0278294	0.28	6.863	-0.01	0.000265018	0.34	Not in sex-specific list	No	Yes
234942_s_at	DNTTIP1	7.174	-0.004	0.0256731	0.092	7.118	-0.002	0.591221	0.036	7.248	-0.006	0.019372	0.166	Not in sex-specific list	No	Yes
234953_x_at	ZNF19	5.447	-0.004	0.000764719	0.178	5.483	-0.004	0.148892	0.152	5.463	-0.006	0.00162668	0.271	Not in sex-specific list	No	Yes
235006_at	CDKN2AIPNL	6.762	-0.011	1.19604e-06	0.322	6.906	-0.013	0.00567448	0.392	6.685	-0.011	0.00107846	0.287	Not in sex-specific list	No	Yes
235018_at	CSRNP3	7.993	-0.007	0.0036859	0.14	7.827	-0.003	0.578744	0.037	8.149	-0.011	0.00154592	0.273	Not in sex-specific list	No	Yes
235121_at	ZNF542P	6.657	-0.006	8.367e-05	0.229	6.684	-0.006	0.0426145	0.249	6.661	-0.007	0.00339445	0.241	Not in sex-specific list	No	Yes
235191_at	LINC00662	6.842	-0.006	0.000594053	0.184	6.779	-0.004	0.114447	0.173	6.911	-0.008	0.00622594	0.216	Not in sex-specific list	No	Yes
235295_at	PANX1	7.54	-0.012	6.25938e-08	0.383	7.511	-0.01	0.0179482	0.314	7.616	-0.015	5.02328e-06	0.489	Not in sex-specific list	No	Yes
235308_at	ZBTB20	7.429	0.009	0.000223715	0.207	7.506	0.007	0.0771445	0.204	7.35	0.011	0.00489833	0.226	Not in sex-specific list	No	Yes
235320_at	ARL6	8.625	-0.009	4.86165e-08	0.39	8.628	-0.008	0.00564568	0.392	8.674	-0.011	8.40705e-06	0.466	Not in sex-specific list	No	Yes
235344_at	PPM1A	7.729	-0.008	0.000792931	0.177	7.7	-0.005	0.239441	0.113	7.815	-0.011	0.00120056	0.283	Not in sex-specific list	No	Yes
[truncated: 41,137 more rows]
