# Supplementary material for: Genome-wide transcriptome profiling and development of age prediction models in the human brain
Source: Aging (Albany NY). 2024 Feb 28;16(5):4075–94. doi: 10.18632/aging.205609 (PMC10968712; doi:10.18632/aging.205609)
Supplement: Supplementary Table 7 [file aging-16-205609-s008.xlsx]

## Sheet: Sheet1
Supplementary Table 7. Summary of differentially regulated genes comparing females and males within each age category, related to Figure 2.
Overlaps across all age categories
Probe set	Symbol	Chr. Loc.	Up or down among males (ref: females)
214218_s_at	XIST	chrX:73821657-73821724	Downregul. among males
221728_x_at	XIST	chrX:73821657-73821724	Downregul. among males
224588_at	XIST	chrX:73821657-73821724	Downregul. among males
224589_at	XIST	chrX:73821657-73821724	Downregul. among males
224590_at	XIST	chrX:73821657-73821724	Downregul. among males
227671_at	XIST	chrX:73821657-73821724	Downregul. among males
201909_at	RPS4Y1	chrY:2841602-2932000	Upregul. among males
204409_s_at	EIF1AY	chrY:20575776-20593154	Upregul. among males
205000_at	DDX3Y	chrY:12904108-12920478	Upregul. among males
206624_at	USP9Y	chrY:12537650-12860839	Upregul. among males
206700_s_at	KDM5D	chrY:19703865-19744939	Upregul. among males
207703_at	NLGN4Y	chrY:14522573-14845654	Upregul. among males
211149_at	UTY	chrY:13234577-13480673	Upregul. among males
214983_at	TTTY15	chrY:12537650-12860839	Upregul. among males
228492_at	USP9Y	chrY:12537650-12860839	Upregul. among males
230760_at	ZFY	chrY:2935281-2982506	Upregul. among males
Age 21-39 category
Probe set	Symbol	Chr. Loc.	logFC (ref: females)	P.Value	FDR adj.P.Val
1570360_s_at	DDX3Y	chrY:12904108-12920478	0.533993	1.44556e-06	0.00283428
201028_s_at	CD99	chrX:2691187-2741309	0.807122	6.66239e-06	0.0110532
201029_s_at	CD99	chrX:2691187-2741309	0.735419	2.28287e-05	0.0351685
201909_at	RPS4Y1	chrY:2841602-2932000	3.83205	2.25621e-17	9.73214e-13
203974_at	PUDP	chrX:6667865-7148158	-0.354194	5.59564e-06	0.00965471
204409_s_at	EIF1AY	chrY:20575776-20593154	2.73872	1.26912e-16	2.73718e-12
204410_at	EIF1AY	chrY:20575776-20593154	1.36935	4.90046e-12	2.34868e-08
205000_at	DDX3Y	chrY:12904108-12920478	3.63042	3.72211e-16	5.35178e-12
205001_s_at	DDX3Y	chrY:12904108-12920478	1.32464	6.60874e-11	2.0362e-07
206624_at	USP9Y	chrY:12537650-12860839	2.50784	2.32244e-13	1.43112e-09
206700_s_at	KDM5D	chrY:19703865-19744939	2.26471	1.24976e-13	8.98472e-10
207063_at	TTTY14	chrY:18772706-19077416	0.637704	3.79222e-07	0.000817886
207246_at	ZFY	chrY:2935281-2982506	0.288626	3.14901e-06	0.00590576
207703_at	NLGN4Y	chrY:14522573-14845654	1.78277	9.72055e-15	8.38592e-11
211149_at	UTY	chrY:13234577-13480673	0.525775	4.80269e-06	0.00863183
214218_s_at	XIST	chrX:73821657-73821724	-4.2108	9.50494e-12	4.09996e-08
214983_at	TTTY15	chrY:12537650-12860839	1.31486	1.73552e-11	6.80562e-08
221728_x_at	XIST	chrX:73821657-73821724	-4.16749	3.75876e-11	1.24719e-07
224588_at	XIST	chrX:73820649-73852723	-5.18744	2.2104e-11	7.94545e-08
224589_at	XIST	chrX:73820649-73852723	-2.73147	2.06198e-12	1.11179e-08
224590_at	XIST	chrX:73821657-73821724	-3.33269	2.45231e-10	6.61128e-07
227671_at	XIST	chrX:73820649-73852723	-4.10105	1.48512e-10	4.27071e-07
228492_at	USP9Y	chrY:12537650-12860839	2.99963	6.80591e-16	7.33932e-12
229022_at	ZFX	chrX:24149173-24216255	-0.562154	2.5349e-07	0.00057549
230760_at	ZFY	chrY:2935281-2982506	0.958756	2.24785e-09	5.38672e-06
232463_at	LINC00685	chrX:320990-321851	0.300661	3.31038e-05	0.0492391
232618_at	TXLNGY	chrY:19567313-19606274	0.830208	4.69992e-07	0.000965385
236694_at	TXLNGY	chrY:19567313-19606274	1.07219	5.4083e-10	1.37228e-06
36553_at	ASMTL	chrX:1403139-1453762	0.541053	8.08195e-06	0.0129117
Age 40-64 category
Probe set	Symbol	Chr. Loc.	logFC (ref: females)	P.Value	FDR adj.P.Val
1570360_s_at	DDX3Y	chrY:12904108-12920478	0.538756	1.78068e-06	0.00349134
201909_at	RPS4Y1	chrY:2841602-2932000	3.52958	2.52715e-15	3.60027e-11
203314_at	GTPBP6	chrX:304529-318796	0.366268	1.5086e-05	0.0260295
204409_s_at	EIF1AY	chrY:20575776-20593154	2.59865	3.33861e-15	3.60027e-11
204410_at	EIF1AY	chrY:20575776-20593154	1.34098	2.06973e-11	6.73366e-08
205000_at	DDX3Y	chrY:12904108-12920478	3.69992	3.7032e-16	1.59737e-11
205001_s_at	DDX3Y	chrY:12904108-12920478	1.22834	1.38252e-09	3.13868e-06
206624_at	USP9Y	chrY:12537650-12860839	2.66966	3.85119e-14	2.76868e-10
206700_s_at	KDM5D	chrY:19703865-19744939	2.19548	9.12605e-13	4.92065e-09
207063_at	TTTY14	chrY:18772706-19077416	0.886577	5.52883e-11	1.58991e-07
207703_at	NLGN4Y	chrY:14522573-14845654	1.77715	2.49964e-14	2.15644e-10
210322_x_at	UTY	chrY:13234577-13480673	0.376997	2.12363e-05	0.0352319
211149_at	UTY	chrY:13234577-13480673	0.719038	4.18056e-09	9.01641e-06
214218_s_at	XIST	chrX:73821657-73821724	-4.23995	1.46237e-11	5.25663e-08
214983_at	TTTY15	chrY:12537650-12860839	1.54728	6.77621e-14	4.1756e-10
221728_x_at	XIST	chrX:73821657-73821724	-4.41829	9.21086e-12	3.61191e-08
223646_s_at	TXLNGY	chrY:19567313-19606274	0.845321	3.27074e-06	0.00613405
224588_at	XIST	chrX:73820649-73852723	-5.28786	2.18549e-11	6.73366e-08
224589_at	XIST	chrX:73820649-73852723	-2.70976	5.62643e-12	2.69662e-08
224590_at	XIST	chrX:73821657-73821724	-3.75653	7.53876e-12	3.25185e-08
227671_at	XIST	chrX:73820649-73852723	-4.27774	6.78343e-11	1.7212e-07
228492_at	USP9Y	chrY:12537650-12860839	2.99181	1.80239e-15	3.60027e-11
230760_at	ZFY	chrY:2935281-2982506	1.09399	6.04329e-11	1.62923e-07
231592_at	TSIX	chrX:73792205-73829231	-0.532466	9.87894e-06	0.0177553
232618_at	TXLNGY	chrY:19567313-19606274	0.920069	6.24602e-08	0.000128296
236694_at	TXLNGY	chrY:19567313-19606274	1.08851	6.08464e-10	1.45812e-06
Age 65-84 category
Probe set	Symbol	Chr. Loc.	logFC (ref: females)	P.Value	FDR adj.P.Val
201909_at	RPS4Y1	chrY:2841602-2932000	4.68092	5.70711e-14	2.46176e-09
203314_at	GTPBP6	chrX:304529-318796	0.649923	1.60551e-07	0.00031479
203974_at	PUDP	chrX:6667865-7148158	-0.536882	2.42365e-06	0.00418177
204409_s_at	EIF1AY	chrY:20575776-20593154	3.02634	1.13539e-11	9.79504e-08
204410_at	EIF1AY	chrY:20575776-20593154	1.50372	3.33063e-08	8.45098e-05
205000_at	DDX3Y	chrY:12904108-12920478	4.49291	3.69823e-13	6.53419e-09
205001_s_at	DDX3Y	chrY:12904108-12920478	1.50941	8.44549e-08	0.000191735
206624_at	USP9Y	chrY:12537650-12860839	2.91746	6.51912e-10	2.34335e-06
206700_s_at	KDM5D	chrY:19703865-19744939	2.73254	1.2213e-10	4.78916e-07
207063_at	TTTY14	chrY:18772706-19077416	1.0566	1.38241e-08	3.97535e-05
207703_at	NLGN4Y	chrY:14522573-14845654	1.82048	3.39522e-09	1.12656e-05
211149_at	UTY	chrY:13234577-13480673	0.972502	1.82972e-08	4.93282e-05
214218_s_at	XIST	chrX:73821657-73821724	-6.01362	1.75423e-11	1.02688e-07
214983_at	TTTY15	chrY:12537650-12860839	1.55929	1.06712e-08	3.28786e-05
216975_x_at	NPAS1	chr19:47019837-47045775	0.586519	3.02247e-05	0.0482868
221728_x_at	XIST	chrX:73821657-73821724	-6.17247	1.90449e-11	1.02688e-07
224588_at	XIST	chrX:73820649-73852723	-7.35205	5.22446e-11	2.25357e-07
224589_at	XIST	chrX:73820649-73852723	-4.09592	6.05929e-13	6.53419e-09
224590_at	XIST	chrX:73821657-73821724	-5.2373	1.68378e-11	1.02688e-07
224936_at	EIF2S3	chrX:24054946-24078810	-0.433136	4.67137e-07	0.000876086
227671_at	XIST	chrX:73820649-73852723	-6.1469	5.1688e-11	2.25357e-07
228492_at	USP9Y	chrY:12537650-12860839	3.72256	5.56418e-13	6.53419e-09
230760_at	ZFY	chrY:2935281-2982506	1.19575	1.38979e-07	0.00028547
231592_at	TSIX	chrX:73792205-73829231	-0.939698	1.02823e-07	0.000221765
232618_at	TXLNGY	chrY:19567313-19606274	1.14356	1.50122e-06	0.00269814
234952_s_at	PHRF1	chr11:576501-612474	0.526573	5.02903e-06	0.00834336
236694_at	TXLNGY	chrY:19567313-19606274	1.31861	6.19808e-08	0.00014853
Age 85-105 category
Probe set	Symbol	Chr. Loc.	logFC (ref: females)	P.Value	FDR adj.P.Val
1552302_at	TMEM106A	chr17:43211835-43220041	0.263756	0.00131375	0.0318542
1552314_a_at	EYA3	chr1:27970344-28088637	0.278493	0.00223869	0.041281
1552415_a_at	WFDC9	chr20:45607939-45631284	-0.321012	0.0012448	0.0309479
1552419_s_at	TTLL10	chr1:1173880-1197936	-0.389323	4.50517e-05	0.00758745
1552432_at	MFSD6L	chr17:8797110-8799365	-0.409338	3.29428e-05	0.006898
1552439_s_at	MEGF11	chr15:65895079-66253756	0.949195	0.000118287	0.0109897
1552497_a_at	SLAMF6	chr1:160485030-160523262	-0.807151	0.000870308	0.0263359
1552499_a_at	ZSCAN20	chr1:33472645-33501643	-0.375525	5.45862e-05	0.00814733
1552526_at	FAM71C	chr12:99647753-99650114	-0.290342	0.00103589	0.0285332
1552579_a_at	ADAM21	chr14:70417107-70460427	-0.360255	0.00151463	0.0339553
1552580_at	TRIML2	chr4:188091272-188109603	0.404952	0.000309042	0.0169169
1552629_a_at	JMJD6	chr17:76712832-76726799	-0.368238	0.000302511	0.0168371
1552663_a_at	ERC1	chr12:990509-1495933	-0.549989	0.00201798	0.039104
1552714_at	CREG2	chr2:101345550-101387503	-0.981225	0.00301569	0.0479653
1552721_a_at	FGF1	chr5:142592178-142698070	1.32526	4.70547e-05	0.00777664
1552754_a_at	CADM2	chr3:84958989-86074429	-0.626112	0.000416814	0.0188435
1552777_a_at	RAET1E	chr6:149817937-149896011	-0.288197	0.00132621	0.031923
1552800_at	ABHD11	chr7:73736094-73738852	-0.588735	0.00160118	0.0349274
1552836_at	ZNF619	chr3:40477113-40491053	-0.515343	0.000699485	0.023756
1552919_at	C4orf36	chr4:86876205-86892422	0.31211	0.000592359	0.0222573
1552935_at	RTL3	chrX:78656068-78659328	-0.399688	0.000457569	0.0197373
1552946_at	ZNF114	chr19:48270081-48287608	0.360698	0.00122726	0.0307063
1552964_at	CFAP46	chr10:132808392-132942823	-0.367496	0.00251033	0.0439997
1552977_a_at	CNPY3	chr6:42929480-42939294	0.646554	0.000201142	0.0142354
1553047_at	PIP4K2B	chr17:38765691-38800126	-0.444566	0.000514107	0.021
1553081_at	WFDC12	chr20:45123425-45124465	-0.648038	0.000930433	0.0271303
1553088_a_at	BCL2L11	chr2:111119378-111168445	-0.530277	0.00304607	0.048235
1553093_a_at	DEFB119	chr20:31377164-31390590	-0.329069	0.000963107	0.0275123
1553114_a_at	PTK6	chr20:63528001-63537376	-0.379784	0.00158312	0.0347697
1553136_at	KCTD18	chr2:200488958-200519784	-0.468414	0.000888069	0.0265575
1553151_at	ATP6V0D2	chr8:85987323-86154225	-0.308929	0.000127406	0.011308
1553153_at	ATP6V0D2	chr8:85987323-86154225	-0.629677	0.000552373	0.0217333
1553155_x_at	ATP6V0D2	chr8:85987323-86154225	-0.392248	0.00232723	0.0421232
1553163_at	ADPRHL1	chr13:113399611-113453488	-0.383397	0.000796331	0.0253689
1553181_at	DDX31	chr9:132592997-132670401	-0.515277	0.000776521	0.0249964
1553208_s_at	ARL10	chr5:175792504-175800503	-0.322219	0.00209622	0.0398872
1553213_a_at	KRT78	chr12:52837804-52849092	-0.37775	0.000814108	0.0254427
1553218_a_at	ZNF512	chr2:27582969-27623217	-0.515545	6.20029e-05	0.00850936
1553246_a_at	POMK	chr8:43093498-43131180	-0.541177	2.08584e-05	0.00612059
1553272_at	SLC36A1	chr5:151437046-151492379	-0.521302	0.000367492	0.0181796
1553279_at	BTNL9	chr5:181040225-181061521	-0.528906	0.000666526	0.023261
1553314_a_at	KIF19	chr17:74326210-74355820	0.321306	0.00284588	0.0467427
1553318_at	RIBC1	chrX:53422690-53431120	-0.489802	0.0026693	0.0455789
1553351_at	OTUD7A	chr15:31475398-31870789	0.560471	0.000768981	0.0249292
1553376_a_at	AXDND1	chr1:179365720-179554735	0.267189	0.00325325	0.0499792
1553422_s_at	RBFOX1	chr16:5239802-7713340	-0.665963	0.000292619	0.0166879
1553464_at	FLJ40288	chr7:132648794-132728769	-0.515938	0.00251179	0.0440073
1553467_at	DCAF8L2	chrX:27590344-27749942	-0.490586	0.000246526	0.0155517
1553512_at	HOXC12	chr12:53954903-53958956	0.407967	0.00209785	0.0398872
1553526_at	NLRP8	chr19:55947832-55988629	-0.558698	8.13836e-05	0.00948778
1553540_a_at	SLC29A2	chr11:66362521-66372214	-0.389809	0.00033155	0.0173561
1553550_at	VN1R5	chr1:247255972-247257210	-0.32878	0.000906662	0.0268053
1553558_at	TAS2R41	chr7:143477873-143478796	-0.376439	3.24899e-05	0.006898
1553587_a_at	POLE4	chr2:74958643-74970128	0.678613	3.06362e-06	0.00249338
1553592_x_at	BCRP3	chr22:22994680-22996550	-0.279438	0.00144344	0.03312
1553602_at	MUCL1	chr12:54830518-54896008	-0.493847	0.00269728	0.045698
1553647_at	CDYL2	chr16:80597907-80804598	-0.633475	1.7612e-05	0.00575525
1553706_at	HTRA4	chr8:38974228-38988663	-0.328577	0.000732015	0.0242792
1553708_at	LINC00525	chr7:47761476-47766772	-0.401535	1.73379e-06	0.00202127
1553721_at	RNF152	chr18:61808067-61894247	0.309864	0.00204132	0.0393442
1553729_s_at	LRRC43	chr12:122167738-122203471	0.335432	0.00258951	0.0448229
1553797_a_at	SILC1	chr2:5932543-6003510	0.822439	0.00237701	0.0426107
1553863_at	WDFY4	chr10:48684873-48982956	-0.422791	1.26737e-05	0.00506185
1554010_at	NDST1	chr5:149900593-149919334	-0.446919	0.00108157	0.029073
1554034_a_at	FRMD4A	chr10:13643706-14462142	0.335629	0.00234547	0.0423314
1554039_at	DGLUCY	chr14:91060333-91225632	-0.533465	0.00302694	0.0480379
1554059_at	SETMAR	chr3:4303332-4317265	-0.659988	0.000118568	0.0109897
1554065_at	MVB12B	chr9:126326829-126507041	-0.331349	0.00248915	0.0437801
1554076_s_at	TLCD5	chr11:120325296-120333686	-0.495946	0.00013254	0.0115723
1554091_a_at	TIRAP	chr11:126282497-126298845	-0.542542	0.00206174	0.0395963
1554099_a_at	SPIN3	chrX:56818298-56995827	-0.482979	0.00017823	0.0134877
1554161_at	SLC25A27	chr6:46652915-46678190	-0.805927	0.000533077	0.0214699
1554167_a_at	GOLGA7	chr8:41488200-41511095	0.511069	0.00043582	0.0191953
1554170_a_at	MBLAC1	chr7:100126785-100128495	-0.455116	0.00203092	0.0392138
1554202_x_at	CABP4	chr11:67452406-67461752	-0.545436	0.00124336	0.0309375
1554231_a_at	ZNF396	chr18:35366694-35377337	-0.287477	0.00204955	0.0394852
1554248_at	ZNF638	chr2:71558884-71607696	-0.371027	0.00107367	0.0289894
1554280_a_at	C9orf43	chr9:113410054-113429690	0.372704	0.000247327	0.0155517
1554312_at	RNF170	chr8:42849637-42897290	-0.603488	6.55783e-05	0.00873062
1554342_s_at	HELQ	chr4:83407343-83455855	-0.31639	0.000561132	0.0217333
1554367_at	CALHM1	chr10:103453240-103458900	-0.334642	0.00268716	0.0456341
1554376_s_at	HACD1	chr10:17589032-17617374	0.673611	0.00155226	0.0343676
1554396_at	UEVLD	chr11:18529609-18588747	-0.371552	0.00232402	0.0421232
1554417_s_at	APH1A	chr1:150265399-150269580	-0.452606	0.00214627	0.0404988
1554424_at	FIP1L1	chr4:53377839-54295272	0.399801	0.00129042	0.0315189
1554480_a_at	ARMC10	chr7:103086630-103099764	0.412308	0.00182663	0.0370993
1554483_at	TMEM37	chr2:119429901-119438504	-0.699911	3.00848e-05	0.00686097
1554501_at	TSC22D4	chr7:100463359-100479232	0.422381	0.00161061	0.0349994
1554583_a_at	ETFBKMT	chr12:31647160-31673114	-0.380347	0.00128643	0.0314391
1554600_s_at	LMNA	chr1:156082573-156140081	0.446476	0.000977493	0.0277198
1554697_at	ADAMTS9	chr3:64515654-64688000	0.694299	0.00110859	0.0294634
1554719_at	NDUFA10	chr2:239892450-240025743	-0.273491	0.00232332	0.0421232
1554730_at	MCTP1	chr5:94703690-95285094	-0.32076	0.00118901	0.0303119
1554737_at	FBN2	chr5:128257909-128659185	-0.274449	0.000872762	0.0263359
1554801_at	FNDC9	chr5:157341596-157460100	-0.842275	0.000239662	0.0152908
1554818_s_at	DZANK1	chr20:18383367-18467281	-0.331651	0.000874056	0.0263359
1554830_a_at	STEAP3	chr2:119223831-119265652	0.472196	2.71622e-07	0.000881315
1554833_at	MCTP2	chr15:94231538-94483952	-0.403128	0.000250816	0.015644
1554857_at	ELMO2	chr20:46366050-46432985	-0.402314	0.001796	0.0368782
1554911_at	ABCC11	chr16:48165773-48247568	-0.536353	0.00272051	0.0458754
1554931_at	CYP4A11	chr1:46929177-46941484	-0.298501	0.000351868	0.0178665
1554950_at	ACAN	chr15:88803436-88875353	-0.552471	0.000674181	0.0232957
1554984_a_at	HLA-DOB	chr6:32784267-32784774	-0.382193	7.65118e-05	0.00942954
1555001_at	IQCF1	chr3:51842522-51937384	-0.403836	0.000401907	0.0186037
1555049_at	TSPEAR	chr21:44497893-44711572	0.402256	5.90245e-05	0.00843053
1555086_at	STAT5B	chr17:42199176-42288633	-0.846915	1.40259e-05	0.00525057
1555088_x_at	STAT5B	chr17:42199176-42288633	-0.889264	1.69144e-05	0.00560971
1555092_at	VASH2	chr1:212950520-212992037	-0.680787	0.0003083	0.0168977
1555201_a_at	RMND1	chr6:151398898-151452158	-0.442591	0.000672386	0.0232957
1555213_a_at	CLEC7A	chr12:10116777-10130258	0.418141	0.00137373	0.0324916
1555214_a_at	CLEC7A	chr12:10116777-10130258	0.3333	0.00305807	0.0483187
1555219_at	RGR	chr10:84230666-84259960	-0.368485	0.000988588	0.0278874
1555252_a_at	TRPM3	chr9:70529060-71446904	-0.448384	0.000508279	0.0209204
1555264_a_at	LINC00598	chr13:40079106-40535807	-0.371571	0.00146633	0.0333598
1555300_a_at	MED12L	chr3:151085286-151437072	-0.349853	0.00144568	0.0331347
1555401_at	SOHLH2	chr13:36168217-36214588	-0.448075	0.00139675	0.0325845
1555403_a_at	CDH19	chr18:66501083-66604138	0.412602	0.000327381	0.017288
1555412_at	FBXL21P	chr5:135930317-135951591	0.29781	0.000277904	0.0163762
1555465_at	MCOLN2	chr1:84925583-84997113	-0.408264	0.000822054	0.0255287
1555495_a_at	CWC27	chr5:64766368-65102412	0.556239	0.000292351	0.0166879
1555497_a_at	CYP4B1	chr1:46757838-46819413	-0.446992	0.000384335	0.0182161
1555514_a_at	PIAS2	chr18:46803218-46920160	-0.554237	0.00296328	0.0476494
1555516_at	FOXP2	chr7:114086327-114693772	-0.284202	0.00181303	0.0369938
1555529_at	RNH1	chr11:494512-507300	-0.335972	0.000284236	0.0165459
1555546_a_at	POFUT2	chr21:45263928-45287898	-0.56216	0.000477554	0.0201415
1555661_at	OR8D1	chr11:124302831-124315099	-0.379484	4.17954e-06	0.00269081
1555695_a_at	CLRN1	chr3:150882997-150941743	-0.460081	1.40766e-05	0.00525057
1555697_at	KLK4	chr19:50906351-50911395	-0.609358	0.000863283	0.0262522
1555760_a_at	RBM15	chr1:110338506-110346681	-0.454967	0.00253233	0.0441699
1555779_a_at	CD79A	chr19:41877279-41881372	-0.380069	0.0029201	0.0472857
1555786_s_at	LINC00520	chr14:55781132-55796731	-0.855064	0.00271334	0.0458083
1555811_at	ARHGDIB	chr12:15095302-15103658	-0.514247	0.00232696	0.0421232
1555823_at	PACS2	chr14:105300563-105398147	-0.619139	0.000961705	0.0274979
1555831_s_at	LRRC41	chr1:46261196-46303616	-0.400142	0.00189267	0.0378315
1555834_at	UCHL1	chr4:41267836-41270446	-0.805324	0.000133335	0.0115723
1555843_at	HNRNPM	chr19:8444767-8489114	-0.614397	5.05178e-05	0.00786294
1555860_x_at	THUMPD3-AS1	chr3:9349689-9398579	-0.483493	0.00295744	0.0476183
1555932_at	TSGA10	chr2:98997261-99154964	0.408071	1.59828e-05	0.00551534
1555980_a_at	LINC02593	chr1:916865-921016	-0.389386	0.000429052	0.0190808
1555990_at	C22orf42	chr22:32149006-32159322	-0.469512	0.00131618	0.0318604
1555995_a_at	DIAPH3-AS1	chr13:60012734-60044357	-0.381561	0.00275685	0.04612
1556001_at	MAPK8IP2	chr22:50600793-50613981	-0.49523	0.000114213	0.0109172
1556047_s_at	MAGEE1	chrX:76427710-76431342	-0.563048	1.22755e-05	0.00500199
1556122_at	RAB11B-AS1	chr19:8374372-8390685	0.339898	2.73083e-05	0.00675632
1556129_at	ZNF778	chr16:89217703-89237141	-0.447877	0.00132087	0.0319013
1556200_a_at	C10orf90	chr10:126424997-126798708	0.581561	0.00195572	0.0383977
1556269_at	MYT1	chr20:64155437-64245898	0.352742	0.000702187	0.023756
1556312_at	PCARE	chr2:29060976-29074523	-0.405944	9.47593e-05	0.01026
1556406_at	LINC00879	chr3:94942032-95168351	-0.39705	0.00149584	0.0337735
1556460_a_at	ARHGAP22-IT1	chr10:48510525-48511589	-0.481396	9.33089e-05	0.0101896
1556472_s_at	SCML4	chr6:107702154-107824317	0.267389	0.00319899	0.0495827
1556721_at	C20orf203	chr20:31220660-31239680	-0.827063	4.77284e-05	0.00778644
1556747_a_at	LOC101928343	chr17:74599820-74607246	-0.466759	0.00151377	0.0339553
1556797_at	GRASLND	chr2:6911754-6918734	-0.730252	0.00244792	0.0433411
1556874_a_at	MEX3C	chr18:51174550-51218333	-0.305056	0.0029238	0.0473061
1556886_a_at	LAYN	chr11:111409831-111412452	-0.28612	0.000338796	0.0176072
1556894_at	NT5DC2	chr3:52567983-52570268	0.628404	0.00014262	0.0119574
1556914_at	LINC01838	chr19:34905315-34908188	-0.520391	0.00291619	0.0472538
1556919_at	LEPR	chr1:66094459-66096057	-0.622712	6.14275e-05	0.00850936
1556921_at	PTPRT-AS1	chr20:42968743-42971492	0.278897	0.00118271	0.030281
1556987_s_at	OR2H1	chr6:29456962-29464109	-0.563782	0.000949884	0.0274227
1557021_s_at	LOC100507250	chr12:68674371-68687755	0.263598	0.00115442	0.0299435
1557059_at	NIFK-AS1	chr2:121649320-121728563	-0.430457	0.0027728	0.0461794
1557060_at	OVAAL	chr1:180509380-180566523	-0.350617	0.00152133	0.0339732
1557064_s_at	HGSNAT	chr8:43140464-43202855	-0.501478	0.000196272	0.0140552
1557165_s_at	KLHL18	chr3:47282917-47346816	-0.392376	0.0028028	0.0463066
1557194_a_at	RAD54L2	chr3:51538719-51668667	-0.442178	0.000805922	0.0253737
1557258_a_at	BCL10	chr1:85740069-85742280	-0.554881	0.000120776	0.0110844
1557380_at	AGAP11	chr10:86970741-87010126	0.326359	0.000623856	0.0227545
1557382_x_at	AGAP11	chr10:86970741-87010126	0.342993	0.00137393	0.0324916
1557388_at	RTTN	chr18:70003031-70205726	-0.772786	1.51822e-05	0.00529072
1557410_at	LOC100506606	chr12:29277955-29317848	-0.264635	0.00104231	0.0286371
1557444_at	TREML3P	chr6:41209634-41217947	-0.267796	0.00106334	0.028907
1557521_a_at	BLCAP	chr20:37492472-37527931	-0.433838	4.80166e-05	0.00778644
1557531_a_at	C10orf55	chr10:73909969-73922777	0.416501	6.76162e-07	0.00121526
1557540_at	LOC100507403	chr8:37326575-37331991	-0.481772	8.40812e-05	0.00962027
1557565_a_at	ALKBH3-AS1	chr11:43909289-43920944	-0.321267	0.000537659	0.0215082
1557570_a_at	LINC01305	chr2:174326027-174330643	-0.315227	0.000389563	0.0183048
1557584_at	LERFS	chr2:10690344-10692099	-0.350872	0.00243163	0.0431549
1557605_a_at	LOC401312	chr7:22419444-22727613	-0.447927	0.00228054	0.041727
1557633_at	POM121L8P	chr22:18846811-18861049	-0.425475	2.94229e-05	0.00686097
1557666_s_at	AK8	chr9:135751698-135753674	-0.739517	0.000122176	0.0111867
1557693_at	SMC5-DT	chr9:70193997-70258866	-0.263564	0.00266266	0.045577
1557700_at	POLH	chr6:43576185-43620523	-0.464349	0.000993992	0.0279179
1557759_at	DMAC2	chr19:41431318-41440717	0.376526	0.00224707	0.0413584
1557823_s_at	LINC02232	chr4:64885649-65024485	0.287729	0.000376726	0.0181859
1557888_at	ZNF787	chr19:56087366-56121295	-0.479957	0.000109887	0.0108292
1557985_s_at	CEP78	chr9:78236062-78279690	0.287999	0.00201133	0.0390317
1557986_s_at	SMCR8	chr17:18315293-18328056	-0.416217	0.000240211	0.0152908
1557991_at	METTL6	chr3:15381275-15440566	0.385232	0.00165566	0.0354201
1558081_at	SNORA65	chr9:130210293-130211262	-0.472966	0.00149105	0.0337443
1558113_at	FAM78B	chr1:166057426-166167001	-0.416453	0.000883065	0.0264889
1558120_at	DDX3X	chrX:41193414-41197878	-0.405982	0.000729697	0.0242679
1558154_at	LLGL2	chr17:73561358-73563545	0.602529	3.18628e-06	0.00249891
1558177_at	TMEM229B	chr14:67447084-67533739	-0.431066	0.00220393	0.040977
1558195_at	LINC00592	chr12:52164115-52223813	-0.41253	0.00269479	0.0456738
1558230_at	SF3B2	chr11:66050729-66069308	-0.534369	0.00023662	0.0152456
1558289_at	RFT1	chr3:53088483-53130453	-0.420103	0.000246391	0.0155517
1558306_at	THADA	chr2:43230851-43596038	-0.389242	3.11466e-05	0.00686097
1558336_at	LOC100130268	chr12:75234740-75298508	-0.431782	0.000399189	0.018575
1558398_at	ANKRD24	chr19:4182689-4224814	0.31844	0.0011684	0.0301068
1558407_at	PLEKHG2	chr19:39412669-39428415	-0.370573	0.000478263	0.0201415
1558423_at	LINC00265	chr7:39733430-39793092	-0.640351	3.7051e-05	0.00746279
1558425_x_at	LINC00265	chr7:39733430-39793092	-0.501505	0.000106018	0.0106379
1558438_a_at	IGHE	chr14:105722565-105723298	-0.50304	0.00124699	0.0309845
1558484_s_at	LRRC27	chr10:132332154-132381508	-0.45313	7.99217e-05	0.00943864
1558487_a_at	TMED4	chr7:44577894-44582287	0.702777	0.000884543	0.0265148
1558577_at	ACTG1P25	chr1:202861754-202875241	-0.363088	3.90781e-05	0.00748132
1558688_at	STX17-DT	chr9:99397024-99906605	-0.892922	0.00020708	0.0142463
1558758_s_at	SPRING1	chr12:116710171-116738070	-0.500904	0.00187751	0.0377385
1558762_a_at	ZNF789	chr7:99472890-99503650	-0.395227	0.00317061	0.0493022
1558802_at	TM2D1	chr1:61681046-61725423	0.499631	0.000379659	0.0181859
1558820_a_at	CCDC178	chr18:32937402-33441101	-0.574408	0.000639924	0.0230303
1558839_at	MAPKBP1	chr15:41774434-41827855	-0.536158	9.99011e-05	0.0105103
1558855_at	FARP2	chr2:242421372-242423364	-0.361967	0.000583811	0.0221062
1558920_at	SLC8A1-AS1	chr2:39786453-40255209	-0.295909	0.00300476	0.0478649
1559031_at	EXOSC10	chr1:11128527-11133154	-0.703578	3.05798e-06	0.00249338
1559034_at	SIRPB2	chr20:1470741-1491587	0.363342	0.00182752	0.0370993
1559048_at	BAHCC1	chr17:81395457-81466331	-0.81073	1.58292e-06	0.00198339
1559052_s_at	PAK2	chr3:196739857-196832647	0.62278	0.000356474	0.0180476
1559145_at	GRASLND	chr2:6911754-6918734	-0.384411	0.00210549	0.0399783
1559167_x_at	MPV17L	chr16:15480860-15498390	-0.686027	0.00285218	0.0467789
1559205_s_at	LINC02273	chr4:152090459-152110157	-0.455864	0.00304578	0.048235
1559220_at	TWF2-DT	chr3:52239256-52241104	-0.638737	0.000478266	0.0201415
1559224_at	LCE1E	chr1:152786214-152788426	-0.771065	0.000300048	0.0167867
1559226_x_at	LCE1E	chr1:152786214-152788426	-0.771153	0.000180827	0.0136194
1559261_a_at	PKD1L2	chr16:81100875-81220370	-0.482836	6.75264e-05	0.00877335
1559268_at	ADAM23	chr2:207479359-207482677	-0.338671	0.00153888	0.0342096
1559321_at	LOC101928858	chr5:67379378-67806600	-0.324502	0.00294935	0.0475594
1559340_at	TTLL11	chr9:121815674-122093606	-0.309424	0.00139984	0.0326141
1559348_a_at	LINC01852	chr15:38068812-38072990	-0.280218	0.000346305	0.0177341
1559413_at	TCP11L2	chr12:106301929-106347003	0.39635	0.00073918	0.0244139
1559489_a_at	LINC01366	chr5:170307722-170335508	-0.300032	0.00160098	0.0349274
1559585_at	DDX60L	chr4:168356735-168537786	-0.34494	0.000478181	0.0201415
1559600_at	HIC2	chr22:21791858-21794246	-0.559915	0.00296965	0.0476572
1559648_at	LINC00892	chrX:136639535-136642433	-0.293886	0.000907639	0.0268158
1559670_at	LOC100506489	chr7:115679345-115682618	0.304489	6.46558e-05	0.00865097
1559674_at	ZNF333	chr19:14689801-14733746	-0.497045	2.40907e-05	0.006493
1559678_s_at	GS1-24F4.2	chr8:6835529-6885235	0.343379	0.000459674	0.0197885
1559682_at	TRIM16L	chr17:15524284-15587602	-0.64757	0.000535899	0.0215082
1559714_at	RGR	chr10:84230666-84259960	-0.387039	0.000928482	0.0271303
1559716_at	INO80C	chr18:35452230-35497979	-0.588173	0.000193744	0.0140169
1559731_x_at	MACROD1	chr11:63998558-64166113	0.418477	0.00164688	0.03536
1559787_at	LINC01800	chr2:64846130-64863626	-0.360728	0.00168876	0.0357782
1559862_at	COPA	chr1:160294267-160295397	0.309888	2.42128e-05	0.006493
1559920_a_at	HDHD5-AS1	chr22:17159351-17165447	0.364852	0.00043327	0.0191336
1559939_at	LOC105369167	chr2:65953719-65982045	-0.603974	0.000370912	0.0181859
1559960_x_at	SYCE1L	chr16:77246171-77246900	0.577818	0.000152398	0.0122877
1559987_at	MSI2	chr17:55562312-55566020	-0.417255	0.00193484	0.0381267
1559989_at	TPM4	chr19:16074292-16077395	-0.449958	0.00133143	0.0319595
1560081_at	RAD51-AS1	chr15:40686183-40695107	0.444996	0.000100484	0.010513
1560097_at	FHAD1	chr1:15236521-15400283	-0.574239	6.14432e-06	0.00363062
1560136_at	ARL5C	chr17:39156894-39167484	-0.274402	0.00249005	0.0437801
1560175_at	PPP4R1L	chr20:58228940-58309494	0.408765	3.8359e-07	0.000973304
1560180_at	GALNT14	chr2:30910467-31155202	-0.415886	2.36698e-05	0.006493
1560181_at	LDLRAD4-AS1	chr18:13419421-13427480	-0.303871	0.000366717	0.0181796
1560213_at	HCP5B	chr6:29871895-29873783	-0.366188	7.19286e-05	0.00907205
1560255_at	CELF2-AS1	chr10:11316833-11319884	-0.62256	3.01028e-05	0.00686097
1560257_at	LOC101928988	chr15:63928274-63935953	-0.326196	0.00175228	0.0365536
1560369_at	ANKH	chr5:14846865-14871717	-0.293879	0.00121947	0.0306494
1560399_a_at	OTUD7A	chr15:31475398-31870789	0.430693	0.000918834	0.0269875
1560404_a_at	DPH6	chr15:35217345-35546193	0.270831	0.000667807	0.0232841
1560426_at	CFAP54	chr12:96489571-96875555	0.330722	0.000494027	0.02051
1560495_at	METTL14-DT	chr4:118664087-118685343	-0.327624	0.000602139	0.0224877
1560496_at	MRGPRF-AS1	chr11:69012283-69018447	-0.638093	0.000209588	0.0143729
1560589_a_at	LINC02683	chr11:13921450-13924863	-0.500012	0.000853026	0.026059
1560610_at	LOC101929621	chr4:109481045-109481547	-0.304842	0.00315133	0.0491263
1560631_at	CALCOCO2	chr17:48831018-48866522	-0.565867	0.00175975	0.0365815
1560656_at	LINC01921	chr2:217735163-217738655	-0.316131	0.00128308	0.031411
1560665_at	SCPEP1	chr17:56978129-57006768	-0.357319	0.00185276	0.0374502
1560673_at	KIZ-AS1	chr20:21148741-21162890	0.287003	0.000536238	0.0215082
1560750_at	LINC01854	chr2:129242173-129273848	-0.316962	6.61064e-05	0.0087618
1560752_at	FBXW2	chr9:120751978-120793416	0.306714	0.00275283	0.04612
1560757_at	TOP1MT	chr8:143304384-143359979	-0.397203	0.000145962	0.0121204
1560785_at	DYRK3	chr1:206635536-206684419	-0.316677	5.1884e-05	0.00793623
1560812_at	LOC101928708	chr16:87212122-87226430	-0.310354	0.000469196	0.0199821
1560826_at	LOC101929398	chr8:56494309-56559823	-0.401817	0.00319132	0.0494993
1560883_s_at	TLX1NB	chr10:102874458-102874945	-0.39993	0.000375354	0.0181859
1560922_s_at	ZNF169	chr9:94259298-94301829	-0.357596	0.00190408	0.0379068
1560937_at	RSU1	chr10:16721352-16748377	0.308891	0.00055596	0.0217333
1561060_at	LOC101929752	chr2:11721619-11724222	-0.677928	3.03864e-06	0.00249338
1561075_at	LOC101060553	chr13:111148196-111153171	-0.449204	0.000757276	0.0247275
1561085_at	LOC153910	chr6:142526455-142637889	-0.388941	0.00208657	0.0398248
1561093_at	SLC22A25	chr11:63158437-63243599	-0.637117	0.000756701	0.0247275
1561104_at	ADGRF5-AS1	chr6:46903471-46909078	-0.364702	0.00281039	0.0463345
1561226_at	XCR1	chr3:46016990-46085825	-0.387198	0.000469732	0.0199821
1561233_at	LOC283387	chr12:57869834-57896482	-0.354694	0.00243238	0.0431549
1561294_a_at	LINC02347	chr12:126438837-126472790	-0.325731	0.00183456	0.0371695
1561306_s_at	STRC	chr15:43599563-43618800	-0.493716	1.49082e-05	0.00529072
1561335_at	CYMP-AS1	chr1:110487680-110490258	-0.548875	0.000939882	0.0272642
1561360_at	ADGB-DT	chr6:146594516-146598931	-0.388356	0.00231882	0.0421147
1561386_at	LOC102723701	chr8:37734761-37737426	-0.422961	1.39065e-05	0.00525057
1561391_at	STAU2-AS1	chr8:73420004-73441526	-0.673572	0.00174875	0.0365113
1561427_at	GRM8-AS1	chr7:127215127-127229927	-0.378009	1.88582e-05	0.00584844
1561473_at	LINC02060	chr5:88408982-88439090	0.291996	0.00179228	0.0368493
1561557_at	LOC105378419	chr10:89213569-89414557	-0.497391	6.45136e-05	0.00865097
1561572_at	LINC02199	chr5:8839699-8898052	-0.44734	0.000326872	0.017288
1561573_at	LINC02620	chr10:104474939-104480274	-0.307218	0.000146644	0.0121264
1561616_a_at	DNAH6	chr2:84516455-84819589	-0.320519	0.00165259	0.0354201
1561673_at	LINC02204	chr15:70570958-70586606	-0.388653	6.6312e-05	0.0087618
1561679_at	LOC105373223	chr1:239247808-239250818	-0.284442	0.0026531	0.0454673
1561723_at	LINC02029	chr3:157081738-157088547	-0.264176	0.00212606	0.0402536
1561997_at	TRIM64EP	chr11:89777155-89782582	0.299405	2.64154e-05	0.00669109
1562019_at	NT5DC4	chr2:112721020-112742879	0.3864	2.92656e-07	0.000881315
1562038_at	LIPC-AS1	chr15:58434890-58498735	0.272931	0.00231046	0.0420104
1562073_at	LOC101927815	chr8:2544294-2607662	-0.347875	0.000329598	0.0173488
1562239_at	SGSM1	chr22:24806169-24927578	-0.475834	0.00186353	0.0375623
1562254_at	STK35	chr20:2124632-2129196	-0.428232	0.00201228	0.0390317
1562256_at	NLRP1	chr17:5499415-5619424	-0.722398	0.00277163	0.0461794
1562267_s_at	ZNF709	chr19:12461184-12513854	-0.607001	0.00011447	0.0109172
1562326_at	LINC01122	chr2:58427738-59063766	-0.310025	0.00199991	0.038908
1562336_at	CASC2	chr10:118046279-118210158	-0.331233	2.76843e-05	0.00675632
1562372_at	SV2C	chr5:76083383-76353939	-0.328331	0.000650902	0.0231067
1562378_s_at	PROM2	chr2:95274449-95291308	-0.445522	0.00217494	0.0407541
1562408_at	LOC101926984	chr17:28263630-28275974	-0.266788	0.00270503	0.0457395
1562409_s_at	LOC101926984	chr17:28263630-28275974	-0.625052	0.000830591	0.0257131
1562411_at	MYLK3	chr16:46702282-46790407	-0.400917	0.000878282	0.0264189
1562460_at	CNDP2	chr18:74495816-74523454	-0.550089	0.000142587	0.0119574
1562462_at	DNAH10	chr12:123826687-123935766	-0.435889	0.0018493	0.0373978
1562488_at	PIEZO2	chr18:10759584-10759649	-0.467386	7.89935e-05	0.00943758
1562492_at	LOC340090	chr5:73195314-73201973	0.429879	9.55906e-08	0.000552563
1562520_at	LOC101929473	chr11:127021736-127172363	-0.266711	0.0019506	0.0383672
1562590_at	PRTG	chr15:55611544-55743152	-0.528245	6.11156e-05	0.00850936
1562598_at	DLG5-AS1	chr10:77927372-77929824	-0.310634	0.00183098	0.0371492
1562633_at	RMST	chr12:97532691-97532958	-0.430081	0.000115243	0.0109253
1562634_at	LINC01689	chr21:24304546-24321377	-0.298578	0.000451016	0.0195131
1562655_at	SCUBE1-AS1	chr22:43275955-43283830	0.374547	0.000122409	0.0111867
1562664_at	LOC102724434	chr7:116275606-116286734	-0.472702	0.000416728	0.0188435
1562674_at	LINC02806	chr1:148295180-148297556	-0.507903	1.9172e-06	0.00202858
1562682_at	RORA-AS1	chr15:60479152-60630637	-0.347105	4.24423e-05	0.00758745
1562695_at	FOXN4	chr12:109277978-109309284	-0.415559	0.000690057	0.0235861
1562712_at	LRRC8C	chr1:89633072-89769903	0.32735	0.00011487	0.0109172
1562717_at	LINC00299	chr2:7988683-8488284	-0.265186	0.00179204	0.0368493
1562733_at	LINC00092	chr9:96019724-96027993	-0.412221	7.43629e-05	0.00924527
1562753_at	ST6GALNAC5	chr1:77508228-77509886	-0.296591	0.000143974	0.0120123
1562778_at	FAM166A	chr9:137243584-137247770	-0.469744	0.000381973	0.0181859
1562790_at	NCALD	chr8:102961418-103032520	0.386122	0.00103802	0.0285554
1562829_at	LINC01734	chr20:39213777-39224748	-0.335647	0.00079504	0.0253557
1562864_at	PACRG-AS2	chr6:163042557-163054161	0.29411	0.000357595	0.0180619
1562906_at	FAM170A	chr5:119629558-119635822	-0.393484	3.0976e-05	0.00686097
1562939_at	CARMIL1	chr6:25279078-25620530	-0.439466	0.000132253	0.0115715
1563022_at	CCDC160	chrX:134237047-134246842	0.281278	0.00120839	0.0304599
1563083_s_at	LINC00486	chr2:32927085-32946149	0.308447	0.00196965	0.0385311
1563090_at	CCDC33	chr15:74610251-74611180	-0.430442	0.00288351	0.0469912
1563117_at	LINC01904	chr18:926083-927993	-0.519763	0.000485378	0.0203731
1563209_a_at	MACROD2	chr20:13995369-16053197	0.50293	0.00200293	0.0389174
1563222_at	TMBIM4	chr12:66135846-66170027	0.40113	0.00080883	0.0253737
1563241_at	LOC101927018	chr17:28926275-28944749	0.270028	0.000174817	0.013447
1563250_at	LINC01875	chr2:545805-546667	-0.494709	0.00016112	0.0126823
1563346_at	C21orf91-OT1	chr21:17763315-17792523	-0.308081	0.00323483	0.0498693
1563391_at	LINC01737	chr1:230592660-230595583	-0.437166	8.45371e-06	0.00424013
1563404_at	LINC01775	chr19:2458935-2462185	0.346447	0.00109517	0.0292509
1563484_at	LINC01847	chr5:159698586-159937766	-0.29155	0.000798317	0.0253689
1563513_at	SYTL4	chrX:100671783-100732123	-0.30592	0.000637383	0.0230075
1563521_at	MOB3B	chr9:27374230-27378942	-0.488148	0.00262794	0.045234
1563528_at	RAPGEF4-AS1	chr2:172677141-172736206	-0.354199	0.00299338	0.0478575
1563586_at	LOC401324	chr7:35353465-35416086	-0.379038	1.84103e-06	0.00202858
1563674_at	FCRL2	chr1:157745733-157777132	-0.341165	0.00118465	0.030281
1563707_at	RPAP3-DT	chr12:47706058-47742294	-0.475011	7.56975e-05	0.0093559
1563728_at	LINC00032	chr9:27245680-27278503	-0.303416	0.00138456	0.0325719
1563805_a_at	FAM83C	chr20:35285731-35292425	0.444703	0.000388838	0.0183048
1563849_at	SH2D4B	chr10:80537902-80646560	-0.310243	0.00136849	0.0323983
1563872_at	VSTM2B-DT	chr19:29287011-29525752	-0.518353	0.000117392	0.0109897
1563874_at	WDR72	chr15:53513741-53762878	-0.525968	0.000230882	0.0150852
1563945_at	YWHAEP7	chr17:37832458-37888896	-0.437721	0.000510939	0.0209499
1563993_at	LOC101929268	chr8:48551567-48698510	-0.398194	0.000411542	0.018799
1563997_at	CEP41	chr7:130393771-130442433	-0.379674	0.000943992	0.0273466
1564012_at	LINC01512	chr6:43891045-43938212	-0.447819	0.00126019	0.0311275
1564060_at	LINC00934	chr12:119283825-119303380	-0.398448	0.00258546	0.0447762
1564112_at	FAM71A	chr1:212624284-212626771	-0.37826	0.000805827	0.0253737
1564129_a_at	QPRT	chr16:29707117-29709316	-0.600037	0.000378167	0.0181859
1564203_at	LOC147004	chr17:33565764-33624122	-0.511833	0.000908448	0.0268213
1564281_at	LINC00491	chr5:102604220-102671765	-1.10547	0.000343881	0.0177341
1564300_at	IQCF5-AS1	chr3:51873596-51875767	-0.320572	0.00296614	0.0476508
1564319_at	FAM71E2	chr19:55352301-55359516	0.377067	0.000223009	0.0147992
1564352_at	CECR3	chr22:17256859-17266733	-0.328418	0.00115652	0.0299665
1564362_x_at	ZNF843	chr16:31432593-31443160	-0.539583	0.000713945	0.0239664
1564373_a_at	LINC02175	chr16:25066937-25088618	-0.403446	0.00281434	0.0463345
1564392_at	LINC00320	chr21:20651450-20803816	0.702995	0.000331446	0.0173561
1564399_a_at	ARMCX4	chrX:101418287-101533459	-0.554335	0.00213245	0.0403081
1564413_at	LINC01356	chr1:112820170-112850643	-0.402229	0.000534736	0.0214966
1564414_a_at	PNLDC1	chr6:159800249-159820704	-0.396401	0.0015492	0.0343539
1564435_a_at	KRT72	chr12:52585589-52601538	0.291369	9.06083e-05	0.0100992
1564439_a_at	MRGPRG-AS1	chr11:3218332-3223131	-0.349369	0.00132786	0.0319368
1564684_at	BTN2A2	chr6:26383096-26394874	-0.382357	0.000371021	0.0181859
1564787_at	ELMOD1	chr11:107591091-107666779	-0.375515	0.00100474	0.0280332
1564883_a_at	TAS1R1	chr1:6555307-6579755	-0.393283	0.00261381	0.0450626
1564921_at	KRTAP13-1	chr21:30396031-30396822	-0.386302	0.00248037	0.0437046
1565130_at	MAP3K2	chr2:128100640-128101048	0.443732	5.29066e-05	0.0079923
1565544_at	RNF141	chr11:10536657-10538268	0.450777	0.000234538	0.0152456
1565559_at	MAGIX	chrX:49021913-49022561	-0.418952	0.00134456	0.0320783
1565588_at	SP140L	chr2:230203110-230313215	-0.306725	0.00142936	0.0329247
1565610_at	LOC100287290	chr3:158453664-158455694	-0.264533	0.00252485	0.0440928
1565638_at	PMP22	chr17:15143743-15147713	0.363438	8.95098e-07	0.0015444
1565836_at	MAP3K9-DT	chr14:71276913-71280446	-0.34228	0.000415461	0.0188435
1565906_at	NADSYN1	chr11:71453109-71524107	-0.414541	1.85408e-05	0.00583765
1565925_at	SLC17A4	chr6:25768066-25768632	-0.268665	0.000610451	0.0225864
1566102_at	TTLL5	chr14:76326201-76330254	-0.272361	0.00202275	0.0391613
1566140_at	HOPX	chr4:56647988-56681899	0.421815	1.02387e-05	0.0046793
1566505_at	ERVK13-1	chr16:2633897-2682418	-0.315651	0.0031269	0.0489402
1566647_s_at	LDC1P	chr1:31500085-31509648	-0.567331	9.7249e-05	0.010403
1566824_at	ARHGAP24	chr4:86597523-86599212	-0.605307	0.000658934	0.0232391
1566956_at	OR7E104P	chr13:63828840-63844125	-0.6035	0.00135421	0.0321569
1566991_at	ARID1B	chr6:156776020-157210779	0.588887	5.79188e-07	0.00118689
1567030_at	SH3GL1P2	chr17:30624413-30625494	0.540932	3.65925e-05	0.00746279
1567069_at	OR4D1	chr17:58148384-58159585	-0.447183	0.000525615	0.0212575
1567081_x_at	CLN6	chr15:68499832-68500202	-0.386919	0.000191851	0.0140169
1567257_at	OR1J2	chr9:122510802-122511743	-0.572712	0.000398707	0.018575
1567286_at	OR5L2	chr11:55827219-55828154	-0.420477	0.00160697	0.0349608
1567297_at	OR13C4	chr9:104526253-104527209	0.363043	0.000238537	0.015266
1567853_at	ZNF28	chr19:53304287-53304455	0.263068	0.000263487	0.0159355
1567862_at	DNAH14	chr1:224896262-225399292	0.310059	0.00114155	0.0298843
1568126_at	ANXA2	chr15:60689456-60690185	0.392192	8.85052e-06	0.00433826
1568675_at	CHRNA10	chr11:3687234-3688805	0.270112	0.000886839	0.0265575
1568717_a_at	FKBP15	chr9:113161006-113221458	-0.321359	0.0010123	0.0281232
1568739_at	LINC02112	chr5:9641305-9903852	0.381541	0.00233905	0.0422863
1568796_at	CCDC157	chr22:30356635-30378673	-0.4662	0.00202533	0.0391761
1568802_at	NADSYN1	chr11:71453109-71524107	0.270372	0.00110235	0.0294062
1568804_at	LOC101928371	chr2:88538720-88575610	-0.423339	3.26569e-05	0.006898
1568879_a_at	LAMA3	chr18:23689453-23956222	-0.355527	0.000624839	0.0227639
1568896_at	STXBP5L	chr3:120908072-121424761	0.295214	0.00217228	0.0407221
1568919_at	LINC01492	chr9:103140523-103325034	0.330527	0.00055817	0.0217333
1569004_at	CARD8-AS1	chr19:48255675-48258199	0.356084	4.79211e-05	0.00778644
1569020_at	NEDD9	chr6:11183298-11382348	-0.450272	0.000102928	0.0105962
1569061_at	IQGAP3	chr1:156525405-156572604	0.367673	0.000703685	0.023788
1569097_at	TP53BP1	chr15:43403061-43510728	0.524798	2.54504e-06	0.00229722
1569139_s_at	FAM53A	chr4:1617915-1684313	0.469384	4.38304e-05	0.00758745
1569206_at	TCP11L2	chr12:106301929-106347003	-0.426016	0.000847604	0.0259485
1569250_at	ZNF333	chr19:14689801-14733746	-0.441556	0.000172429	0.0133292
1569270_at	LOC100134368	chr16:382097-392960	-0.37918	0.00099035	0.0278903
1569337_at	SLC5A9	chr1:48227888-48229561	-0.272033	0.00105344	0.0287777
1569368_at	ACTG1P17	chr15:82725873-82738904	-0.301691	0.00121176	0.0305133
1569421_at	CLDN4	chr7:73799542-73832690	-0.471777	0.000645997	0.0230514
1569431_at	PAFAH1B2	chr11:117144284-117176894	0.293224	0.00269224	0.0456642
1569464_at	PPFIBP1	chr12:27523431-27695564	-0.43981	0.00156909	0.034585
1569470_a_at	FRMD5	chr15:43870761-44195271	-0.343636	0.00235397	0.0424058
1569594_a_at	NEMF	chr14:49782083-49852821	0.758128	0.000377098	0.0181859
1569604_at	LINC01134	chr1:3900347-3917225	-0.275934	0.00200155	0.038908
1569642_at	F2R	chr5:76716126-76735770	-0.407062	0.0013825	0.0325719
1569679_at	CDH22	chr20:46173739-46308498	-0.470018	0.00113913	0.0298777
1569688_at	FMO5	chr1:147175351-147243050	-0.344376	0.000933966	0.0271473
1569696_at	CSMD2-AS1	chr1:33868953-33893726	-0.528558	0.00108819	0.0291185
1569739_at	LOC221946	chr7:5553263-5651932	-0.378059	0.00180701	0.0369409
1569745_at	OSER1-DT	chr20:44210907-44226027	-0.391583	0.000646235	0.0230514
1569756_at	LINC02395	chr12:49900311-49932764	0.326665	0.00085173	0.0260563
1569765_at	LOC105376292	chr9:129575117-129584556	-0.561143	0.00224759	0.0413584
1569775_at	RNF157	chr17:76142465-76240493	-0.552425	0.00158682	0.0347978
1569788_at	ST8SIA1	chr12:22063773-22437041	0.483832	0.000116709	0.0109897
1569791_at	STK4	chr20:44966494-45080021	-0.267669	0.00182343	0.0370993
1569817_at	LINC01505	chr9:109378340-109379842	-0.394906	0.000487651	0.0204109
1569847_at	CGNL1	chr15:57375967-57550717	-0.387063	0.000249081	0.0155802
1569855_at	LOC101928306	chr4:4922534-4990390	-0.376555	4.43079e-05	0.00758745
1569894_at	PPP2R3C	chr14:35086035-35088059	0.371004	0.00227694	0.041727
1569935_at	ZNF664	chr12:124085761-124088598	-0.817013	0.000371855	0.0181859
1569949_at	GRK5	chr19:55132698-55149206	-0.521411	0.00164089	0.0353341
1569961_at	LOC101928844	chr19:5847467-5858239	-0.33977	0.00171765	0.0362136
1569987_at	DLEU7-AS1	chr13:50082169-50906856	-0.491579	0.000176633	0.013447
1570007_at	LRRC8C	chr1:89633072-89769903	-0.664523	0.00210589	0.0399783
1570025_at	TACC2	chr10:121989163-122254545	-0.307457	0.00118755	0.0302928
1570064_at	LOC100419741	chr4:174523701-174540344	-0.546066	0.000398647	0.018575
1570065_at	MIR3667HG	chr22:49414524-49657542	-0.498745	0.00032559	0.017288
1570070_at	CCM2L	chr20:32005671-32031591	-0.577375	0.00078216	0.0250664
1570156_s_at	FMN1	chr15:32765544-33194714	-0.604562	0.000101818	0.0105575
1570219_at	LOXL4	chr10:98252023-98256575	-0.598657	0.000250971	0.015644
1570315_at	HCCAT5	chr16:73092349-73099337	-0.370885	0.00189584	0.0378772
1570479_at	ART1	chr11:3666357-4408992	-0.401244	0.00105525	0.0287907
1570486_at	SOX6	chr11:15966449-16739591	0.28788	0.000855914	0.0261102
1570505_at	ABCB4	chr7:87401696-87480435	-0.310666	0.00114593	0.0299055
1570511_at	ARHGEF10L	chr1:17953461-17954529	-0.373889	6.73397e-05	0.00877335
1570516_s_at	OR51B5	chr11:5303444-5505652	-0.346442	0.000347757	0.0177341
1570650_at	KYAT1	chr9:131643362-131644311	0.324339	0.000556038	0.0217333
1861_at	BAD	chr11:64269830-64284704	0.553039	0.000876969	0.0263978
200019_s_at	FAU	chr11:65120630-65122177	0.344931	0.00305738	0.0483187
200049_at	KAT7	chr17:49788624-49835026	-0.375675	0.00139017	0.0325719
200097_s_at	HNRNPK	chr9:83969748-83969857	-0.349926	0.00287037	0.0469469
200603_at	PRKAR1A	chr17:68511780-68551319	-0.433231	0.00152309	0.0339732
200626_s_at	MATR3	chr5:139293674-139331677	-0.3043	0.00243312	0.0431549
200658_s_at	PHB	chr17:49404049-49414905	0.517358	3.8125e-05	0.00747511
200748_s_at	FTH1	chr11:61959718-61967634	0.265424	0.000789124	0.0252514
200805_at	LMAN2	chr5:177315805-177351840	0.356476	0.000958441	0.0274677
200811_at	CIRBP	chr19:1259384-1274880	-0.657998	0.00264007	0.0453357
200816_s_at	PAFAH1B1	chr17:2593210-2685615	-0.387626	0.00279535	0.0463066
200836_s_at	MAP4	chr3:47850690-48089272	0.390686	0.00119643	0.0304183
200858_s_at	RPS8	chr5:33162179-33162807	0.395471	0.00197183	0.0385387
200998_s_at	CKAP4	chr12:106237881-106304279	-0.49899	0.000126102	0.011308
201028_s_at	CD99	chrX:2691187-2741309	0.98452	0.000296817	0.0167116
201029_s_at	CD99	chrX:2691187-2741309	0.996587	0.000183112	0.0137366
201089_at	ATP6V1B2	chr8:20197381-20226819	-0.565937	0.00176206	0.0365946
201108_s_at	THBS1	chr15:39581079-39599466	-0.42392	0.00190954	0.0379068
201114_x_at	PSMA7	chr20:62136733-62143440	0.453954	0.000478565	0.0201415
201115_at	POLD2	chr7:44114631-44124358	0.304583	0.000753201	0.0247275
201133_s_at	PJA2	chr5:109334713-109409974	-0.474489	0.000304039	0.0168371
201210_at	DDX3X	chrX:41333348-41364472	-0.445265	0.000127274	0.011308
201282_at	OGDH	chr7:44606572-44709066	0.349496	0.00270927	0.0457573
201287_s_at	SDC1	chr2:20200797-20225433	-0.39653	0.00045009	0.0195
201297_s_at	MOB1A	chr2:74152528-74178898	0.56435	0.00305281	0.0483063
201306_s_at	ANP32B	chr9:97983341-98015943	0.65896	0.00141841	0.0328698
201338_x_at	GTF3A	chr13:27424619-27435823	0.43161	0.000445127	0.0193749
201356_at	SF3A1	chr22:30331988-30356919	-0.365982	0.0016441	0.0353355
201362_at	IVNS1ABP	chr1:185296388-185317273	0.600016	0.000118922	0.0109897
201363_s_at	IVNS1ABP	chr1:185296388-185317273	0.460584	0.00137511	0.0325016
201367_s_at	ZFP36L2	chr2:43222402-43226606	0.612737	0.0014044	0.0326219
201376_s_at	HNRNPF	chr10:43385617-43409186	0.474791	0.000404681	0.0186491
201379_s_at	TPD52L2	chr20:63865228-63891545	0.442778	0.000716838	0.0240255
201396_s_at	SGTA	chr19:2754715-2783362	0.395586	0.000177269	0.013447
201404_x_at	PSMB2	chr1:35599541-35641526	-0.618433	0.00251913	0.0440751
201408_at	PPP1CB	chr2:28751640-28802940	-0.497905	6.3223e-05	0.00861333
201431_s_at	DPYSL3	chr5:147390808-147510068	0.555455	4.95878e-05	0.00786294
201440_at	DDX23	chr12:48829756-48852842	0.315085	0.000338226	0.0175988
201455_s_at	NPEPPS	chr17:47522942-47624665	-0.424656	0.00117467	0.0302143
201461_s_at	MAPKAPK2	chr1:206684905-206734281	0.406793	0.000405449	0.0186491
201463_s_at	TALDO1	chr11:747415-765012	0.44743	0.00270737	0.0457432
201467_s_at	NQO1	chr16:69706996-69726668	0.623664	0.00295418	0.0475834
201489_at	PPIF	chr10:79347469-79355334	0.425501	0.000111326	0.0108292
201584_s_at	DDX39A	chr19:14408798-14419383	0.463793	0.000769804	0.0249292
201598_s_at	INPPL1	chr11:72223701-72239147	0.347154	0.000558596	0.0217333
201607_at	PWP1	chr12:107685799-107713162	-0.434317	0.000365002	0.0181796
201641_at	BST2	chr19:17402939-17405630	0.687279	0.00302462	0.0480188
201696_at	SRSF4	chr1:29147743-29181900	0.280471	0.00206927	0.0396395
201712_s_at	RANBP2	chr2:108719482-108785810	-0.521029	9.28556e-05	0.0101658
201736_s_at	MARCHF6	chr5:10353695-10440388	-0.576271	0.00290182	0.0470741
201782_s_at	AIP	chr11:67490245-67490315	0.31579	0.000609225	0.0225864
201791_s_at	DHCR7	chr11:71428193-71452868	0.46968	0.000587891	0.0221473
201799_s_at	OSBP	chr11:59574398-59615774	-0.478664	6.09975e-05	0.00850936
201820_at	KRT5	chr12:52514575-52520530	-0.464306	0.00260705	0.0450281
201840_at	NEDD8	chr14:24216856-24232366	-0.299937	0.00190741	0.0379068
201848_s_at	BNIP3	chr14:28264390-28265974	-0.400517	0.00255669	0.0444689
201851_at	SH3GL1	chr19:4360370-4400547	0.296	0.00240434	0.0428914
201884_at	CEACAM5	chr19:41708585-41730433	-0.356035	0.00267097	0.0455789
201889_at	FAM3C	chr7:121348878-121396364	-0.690911	0.000369976	0.0181859
201905_s_at	CTDSPL	chr3:37861880-37984469	-0.2685	0.00174853	0.0365113
201907_x_at	DVL3	chr3:183873306-183888661	0.333115	0.000466746	0.0199535
201909_at	RPS4Y1	chrY:2841602-2932000	3.08832	3.06473e-07	0.000881315
201920_at	SLC20A1	chr2:112645939-112663825	-0.434143	0.00220178	0.040977
201927_s_at	PKP4	chr2:158456952-158682879	0.697098	0.00229536	0.0418825
201967_at	RBM6	chr3:49940007-50100045	0.486216	0.00036822	0.0181859
202009_at	TWF2	chr3:52228612-52246788	0.499139	4.55994e-05	0.00758745
202035_s_at	SFRP1	chr8:41261962-41309473	0.465195	0.000186167	0.0138308
202073_at	OPTN	chr10:13099449-13138308	-0.461596	0.00138751	0.0325719
202080_s_at	TRAK1	chr3:42013802-42225890	-0.339441	4.35182e-05	0.00758745
202085_at	TJP2	chr9:69035747-69255187	1.2409	0.000997948	0.0279395
202094_at	BIRC5	chr17:78214186-78225636	-0.388506	0.0020981	0.0398872
202098_s_at	PRMT2	chr21:46635595-46665124	0.398965	0.000133754	0.0115853
202107_s_at	MCM2	chr3:127598410-127622436	-0.346022	0.000415739	0.0188435
202132_at	WWTR1	chr3:149517235-149736714	0.430744	0.000847334	0.0259485
202142_at	COPS8	chr2:237085882-237100474	-0.470606	0.000402393	0.0186037
202158_s_at	CELF2	chr10:10798397-11336675	-0.586411	0.00071761	0.0240327
202161_at	PKN1	chr19:14433053-14471867	0.450378	0.00148996	0.0337443
202165_at	PPP1R2	chr5:156850295-156852528	-0.499424	0.00229703	0.0418924
202170_s_at	AASDHPPT	chr11:106075501-106098699	-0.668819	0.00266882	0.0455789
202199_s_at	SRPK1	chr6:35832966-35921342	-0.681927	2.98251e-05	0.00686097
202207_at	ARL4C	chr2:234493041-234497081	-0.701836	0.000284013	0.0165459
202225_at	CRK	chr17:1420689-1463162	0.314831	0.00272998	0.0459478
202228_s_at	NPTN	chr15:73560014-73634134	-0.33724	0.0015243	0.0339779
202237_at	NNMT	chr11:114257787-114313536	-0.630999	0.0013784	0.032526
202238_s_at	NNMT	chr11:114257787-114313536	-0.443519	0.000711182	0.0239476
202242_at	TSPAN7	chrX:38561542-38688920	-0.36694	0.00113728	0.0298777
202262_x_at	DDAH2	chr6:31714445-31718024	0.563421	0.000437315	0.0191953
202284_s_at	CDKN1A	chr6:36676460-36687337	0.834447	0.000643549	0.0230464
202285_s_at	TACSTD2	chr1:59040642-59043445	0.420786	0.000582428	0.0220959
202329_at	CSK	chr15:74782080-74803197	0.32664	0.00216042	0.0405878
202343_x_at	COX5B	chr2:97646062-97648383	0.300598	0.000858575	0.0261385
202344_at	HSF1	chr8:144291591-144314720	0.369372	0.000865113	0.0262608
202345_s_at	FABP5	chr22:16595089-16595485	0.96323	2.98609e-05	0.00686097
202353_s_at	PSMD12	chr17:67337916-67366605	-0.396532	0.000864219	0.0262522
202354_s_at	GTF2F1	chr19:6379572-6393981	0.397405	0.00154954	0.0343539
202374_s_at	RAB3GAP2	chr1:220148293-220272529	-0.504453	0.00152182	0.0339732
202406_s_at	TIAL1	chr10:119571802-119597029	0.279917	0.00257935	0.0447547
202429_s_at	PPP3CA	chr4:101023409-101348278	-0.428872	0.00140411	0.0326219
202457_s_at	PPP3CA	chr4:101023409-101348278	-0.337628	0.00130037	0.03169
202462_s_at	DDX46	chr5:134758771-134855133	-0.406973	0.00177302	0.0367158
202485_s_at	MBD2	chr18:54151606-54224669	-0.432998	0.00292146	0.047286
202490_at	ELP1	chr9:108866898-108934328	0.333997	0.00251974	0.0440751
202496_at	EDC4	chr16:67873052-67884499	0.34042	2.57346e-05	0.00669109
202555_s_at	MYLK	chr3:123610049-123884332	0.608119	0.001336	0.0319954
202568_s_at	MARK3	chr14:103385377-103503831	0.398272	4.53581e-05	0.00758745
202574_s_at	CSNK1G2	chr19:1941172-1981338	0.517567	7.87679e-05	0.00943758
202586_at	POLR2L	chr11:837356-842529	0.35006	0.00276271	0.046136
202597_at	IRF6	chr1:209785617-209806175	-0.621807	0.000898072	0.0266887
202659_at	PSMB10	chr16:67929614-67936017	0.603928	1.18761e-05	0.00496638
202661_at	ITPR2	chr12:26335864-26336950	0.706704	0.00192119	0.0379966
202663_at	WIPF1	chr2:174559572-174682916	0.75152	2.26669e-05	0.00639267
202744_at	SLC20A2	chr8:42416475-42541926	-0.537599	8.27647e-05	0.00954561
202815_s_at	HEXIM1	chr17:45148475-45152099	-0.475823	0.000228468	0.0149545
202830_s_at	SLC37A4	chr11:119024112-119030905	-0.355107	0.00123326	0.0308029
202855_s_at	SLC16A3	chr17:82217934-82261129	0.563829	0.000598459	0.022389
202862_at	FAH	chr15:80152490-80186946	0.578697	0.000686175	0.0235279
202885_s_at	PPP2R1B	chr11:111726908-111766389	-0.34109	2.66806e-05	0.00669109
202922_at	GCLC	chr6:53497341-53616970	-0.390383	0.0026422	0.0453527
202931_x_at	BIN1	chr2:127048027-127107288	0.549723	0.000181234	0.0136194
202949_s_at	FHL2	chr2:105357712-105438513	-0.630966	0.00160803	0.0349608
202960_s_at	MMUT	chr6:49430360-49463253	0.494328	0.0005631	0.0217841
202964_s_at	RFX5	chr1:151340640-151347326	-0.442461	0.000633566	0.0229654
202997_s_at	LOXL2	chr8:23296897-23425328	0.383937	0.00048075	0.0202116
203017_s_at	SSX2IP	chr1:84643706-84690803	-0.713993	0.000832714	0.0257131
203018_s_at	SSX2IP	chr1:84643706-84690803	-0.773562	0.000571457	0.0218817
203019_x_at	SSX2IP	chr1:84643706-84690803	-0.588745	0.000159086	0.0126143
203021_at	SLPI	chr20:45252239-45254564	-1.66284	1.28004e-05	0.00506555
203071_at	SEMA3B	chr3:50267558-50277546	0.599142	0.000258284	0.0158067
203072_at	MYO1E	chr15:59132434-59372871	0.452505	0.00107942	0.029073
203085_s_at	TGFB1	chr19:41301587-41353922	0.878551	0.00142316	0.0328698
203094_at	MAD2L1BP	chr6:43629540-43640941	-0.470292	0.000380507	0.0181859
203096_s_at	RAPGEF2	chr4:159103013-159360174	-1.14902	0.00260972	0.0450281
203101_s_at	MGAT2	chr14:49620799-49623481	0.427161	0.00228465	0.0417671
203113_s_at	EEF1D	chr8:143579697-143597744	0.577087	0.000470504	0.0199953
203148_s_at	TRIM14	chr9:98069275-98119222	0.565767	0.000202014	0.0142354
203157_s_at	GLS	chr2:190880821-190965552	-0.752472	0.00103675	0.0285387
203185_at	RASSF2	chr20:4780023-4823608	0.798939	0.001755	0.0365747
203204_s_at	KDM4A	chr1:43650149-43931014	-0.414367	0.00302014	0.0480158
203230_at	DVL1	chr1:1335276-1349418	0.360269	0.00251411	0.0440122
203236_s_at	LGALS9	chr17:27629798-27649560	0.373609	0.00126908	0.0312275
203252_at	CDK2AP2	chr11:67506497-67508649	0.635453	0.000538032	0.0215082
203264_s_at	ARHGEF9	chrX:63634967-63809274	-0.322395	0.00268638	0.0456341
203299_s_at	AP1S2	chrX:15825806-15854931	-0.431071	0.00172013	0.0362193
203314_at	GTPBP6	chrX:304529-318796	0.600751	3.8495e-06	0.0025998
203339_at	SLC25A12	chr2:171783405-171999859	-0.561574	0.00287221	0.0469469
203341_at	CEBPZ	chr2:37201612-37231596	0.512655	0.00021209	0.0144249
203363_s_at	ATG13	chr11:46617527-46674818	-0.652152	1.06437e-05	0.00478244
203376_at	CDC40	chr6:110180141-110254275	-0.379662	0.000871321	0.0263359
203379_at	RPS6KA1	chr1:26529761-26575030	0.537668	5.84183e-05	0.00837167
203419_at	KMT2B	chr19:35717973-35738880	0.347471	0.00240888	0.0429499
203482_at	SLF2	chr10:100912963-100965134	0.660462	0.00210758	0.0399783
203485_at	RTN1	chr14:59595976-59870776	-0.264871	0.00218833	0.0408631
203498_at	RCAN2	chr6:46220736-46491972	-0.584045	0.00106786	0.0289699
203602_s_at	ZBTB17	chr1:15941869-15976132	0.276989	0.00142566	0.0328857
203626_s_at	SKP2	chr5:36151989-36196849	-0.394835	0.0008123	0.0254141
203644_s_at	MON1B	chr16:77190835-77202398	0.44225	0.000289137	0.0166299
203661_s_at	TMOD1	chr9:97501180-97601743	-0.575183	0.00123713	0.0308282
203759_at	ST3GAL4	chr11:126355640-126440344	0.421956	0.00152094	0.0339732
203784_s_at	DDX28	chr16:68020916-68023232	0.466019	0.00014731	0.0121264
203797_at	VSNL1	chr2:17539126-17657018	-0.406739	0.00132869	0.0319368
203817_at	GUCY1B1	chr4:155758992-155807811	-0.375837	0.00313617	0.0489785
203846_at	TRIM32	chr9:116687305-116701300	-0.643987	2.30812e-06	0.00226274
203853_s_at	GAB2	chr11:78215293-78418348	0.519466	0.00053976	0.0215082
203885_at	RAB21	chr12:71754863-71800286	0.341473	0.00270182	0.0457031
203891_s_at	DAPK3	chr19:3958453-3971123	0.461494	0.00286907	0.0469469
203897_at	LYRM1	chr16:20899868-20925006	0.304535	0.00201798	0.039104
203900_at	SZT2	chr1:43389882-43454247	0.409509	0.000646159	0.0230514
203905_at	PARN	chr16:14435701-14632727	-0.397177	0.000224812	0.0148731
204019_s_at	SH3YL1	chr2:217730-266398	0.377361	0.000936677	0.0271895
204036_at	LPAR1	chr9:110873263-111038470	1.20718	0.00122305	0.0306671
204037_at	LPAR1	chr9:110873263-111038470	0.955605	0.000222198	0.0147682
204045_at	TCEAL1	chrX:103628704-103630953	-0.446944	5.32028e-05	0.00799617
204099_at	SMARCD3	chr7:151238764-151277896	0.606236	0.000211138	0.0144249
204104_at	SNAPC2	chr19:7920338-7923250	0.444333	0.000376997	0.0181859
204106_at	TESK1	chr9:35605262-35610041	0.356193	0.0022349	0.0412504
204114_at	NID2	chr14:52004809-52069059	-0.396627	0.00261271	0.0450616
204163_at	EMILIN1	chr2:27078615-27086403	0.540798	0.000366356	0.0181796
204164_at	SIPA1	chr11:65638101-65650918	0.500925	0.000267135	0.0160231
204192_at	CD37	chr19:49335171-49343335	0.639044	0.00107088	0.0289789
204224_s_at	GCH1	chr14:54842008-54902826	1.01665	4.33368e-05	0.00758745
204234_s_at	ZNF195	chr11:3339261-3379222	0.478261	0.00232506	0.0421232
204236_at	FLI1	chr11:128686535-128813267	0.928363	0.000697085	0.0237463
204238_s_at	DNPH1	chr6:43225629-43229481	0.497416	0.00179196	0.0368493
204292_x_at	STK11	chr19:1177558-1228431	0.457186	0.000523991	0.0212229
204339_s_at	RGS4	chr1:163068775-163076802	-0.977941	0.00314436	0.0490467
204350_s_at	MED7	chr5:157137424-157159019	-0.450838	0.000440882	0.0193081
204370_at	CLP1	chr11:57648188-57661865	-0.386468	0.000644115	0.0230464
204393_s_at	ACP3	chr3:132317369-132368302	-0.32875	0.000280483	0.0164686
204409_s_at	EIF1AY	chrY:20575776-20593154	2.30121	2.68039e-07	0.000881315
204428_s_at	LCAT	chr16:67939750-67944131	0.497342	0.000383358	0.0182116
204465_s_at	INA	chr10:103277138-103290346	-0.479568	0.000595252	0.0223077
204522_at	DXO	chr6:32046253-32048735	0.319332	0.00182063	0.0370963
204559_s_at	LSM7	chr19:2321520-2328611	0.429313	0.00232122	0.0421232
204581_at	CD22	chr19:35319261-35347361	0.55235	1.3128e-05	0.0051016
204591_at	CHL1	chr3:196763-409417	-0.485683	0.000931492	0.0271303
204631_at	MYH2	chr17:10521148-10549700	-0.326418	0.000978073	0.0277198
204653_at	TFAP2A	chr6:10393186-10419659	-0.507278	2.55631e-06	0.00229722
204687_at	PARM1	chr4:74933095-75050115	-0.664784	0.000256113	0.0157595
204698_at	ISG20	chr15:88635670-88656483	0.540701	0.00152157	0.0339732
204703_at	IFT88	chr13:20567138-20691444	0.378218	0.00190794	0.0379068
204714_s_at	F5	chr1:169511951-169586588	0.40339	0.000574245	0.0218817
204726_at	CDH13	chr16:82660632-83830197	-0.577485	0.00085866	0.0261385
204736_s_at	CSPG4	chr15:75674322-75712848	0.549837	0.00056096	0.0217333
204749_at	NAP1L3	chrX:93670930-93673578	-0.460241	1.80347e-06	0.00202858
204754_at	HLF	chr17:55264960-55325187	-0.575602	0.000111073	0.0108292
204755_x_at	HLF	chr17:55264960-55325187	-0.74025	0.00104708	0.0287132
204757_s_at	C2CD2L	chr11:119102198-119118544	-0.397691	0.00166391	0.035461
204765_at	ARHGEF5	chr7:144450317-144475530	-0.39345	0.00135239	0.0321569
204779_s_at	HOXB7	chr17:48607232-48633572	-0.288321	0.000463928	0.0198967
204813_at	MAPK10	chr4:86937631-87275800	-0.425711	0.000550887	0.0217333
204858_s_at	TYMP	chr22:50523568-50526461	0.635042	0.000240363	0.0152908
204862_s_at	NME3	chr16:1770320-1771561	0.310754	0.00184656	0.0373775
204866_at	JADE3	chrX:46912276-47061242	0.550308	0.000591894	0.0222573
204943_at	ADAM12	chr10:126012381-126388477	-0.449176	0.00221563	0.0410883
204979_s_at	SH3BGR	chr21:39380332-39515506	0.47732	0.00013195	0.0115684
204992_s_at	PFN2	chr3:149964904-150050788	-0.320988	0.000361414	0.0181064
204998_s_at	ATF5	chr19:49933064-49933137	0.497279	7.10417e-05	0.00903991
204999_s_at	ATF5	chr19:49933064-49933137	0.442779	0.000377358	0.0181859
205000_at	DDX3Y	chrY:12904108-12920478	3.21467	1.32412e-07	0.000571159
205016_at	TGFA	chr2:70447284-70554193	0.65785	0.00300494	0.0478649
205083_at	AOX1	chr2:200586014-200677064	-0.558601	9.98646e-06	0.00463189
205093_at	PLEKHA6	chr1:204218853-204377665	-0.383499	0.000678238	0.0233486
205099_s_at	CCR1	chr3:46201711-46208313	0.681113	0.000919709	0.0269875
205107_s_at	EFNA4	chr1:155063737-155069553	0.449549	2.45897e-05	0.00654737
205111_s_at	PLCE1	chr10:93993931-94332823	0.696522	0.000488041	0.0204109
205117_at	FGF1	chr5:142592178-142698070	1.17463	1.52092e-05	0.00529072
205127_at	PTGS1	chr9:122370530-122395703	-0.344678	0.00185418	0.0374564
205131_x_at	CLEC11A	chr19:50723364-50725708	0.417248	0.00320114	0.0495981
205162_at	ERCC8	chr5:60866454-60945073	-0.334564	0.000644143	0.0230464
205178_s_at	RBBP6	chr16:24537693-24572863	0.536837	0.0015176	0.0339707
205202_at	PCMT1	chr6:149749444-149811420	-0.396057	0.00324527	0.0499261
205206_at	ANOS1	chrX:8528874-8732137	0.712866	0.00223591	0.0412515
205212_s_at	ACAP1	chr17:7339566-7354514	0.594206	0.00107872	0.029073
205227_at	IL1RAP	chr3:190514051-190659750	0.344347	0.000271	0.0161236
205242_at	CXCL13	chr4:77511753-77611834	-0.308024	0.00123907	0.0308588
205268_s_at	ADD2	chr2:70607618-70768225	-0.557777	0.00273416	0.0459943
205269_at	LCP2	chr5:170246233-170297815	0.773123	0.00125306	0.0310101
205275_at	GTPBP1	chr22:39101727-39127364	0.321724	0.00235325	0.0424058
205281_s_at	PIGA	chrX:15319452-15335554	0.56516	0.00239262	0.0427707
205284_at	URB2	chr1:229626247-229660200	-0.336308	0.000610566	0.0225864
205290_s_at	BMP2	chr20:6767686-6780246	0.505598	0.000458858	0.0197731
205291_at	IL2RB	chr22:37118666-37175118	-0.357123	0.00257039	0.0446351
205296_at	RBL1	chr20:36996349-37095997	0.423994	2.25843e-05	0.00639267
205301_s_at	OGG1	chr3:9749944-9788219	0.458865	0.000138581	0.011837
205311_at	DDC	chr7:50458436-50565405	-0.285682	0.00270651	0.0457432
205312_at	SPI1	chr11:47354860-47378547	0.698847	1.22919e-05	0.00500199
205314_x_at	SNTB2	chr16:69221049-69335107	0.612721	3.69794e-05	0.00746279
205327_s_at	ACVR2A	chr2:147844517-147930826	-0.456255	0.000900095	0.0266887
205342_s_at	SULT1C2	chr2:108288639-108309915	-0.412243	0.000160154	0.0126293
205354_at	GAMT	chr19:1397026-1401570	0.431501	0.00102733	0.0283911
205433_at	BCHE	chr3:165772904-165837462	0.937465	0.000183821	0.013742
205437_at	ZNF211	chr19:57630395-57644041	-0.275456	0.00135567	0.0321569
205438_at	PTPN21	chr14:88465778-88555007	0.364213	5.22618e-05	0.00793772
205447_s_at	MAP3K12	chr12:53479669-53500063	-0.448599	0.000559116	0.0217333
205456_at	CD3E	chr11:118304730-118316175	-0.402665	0.000566691	0.0218057
205460_at	NPAS2	chr2:100820139-100996829	0.451514	0.000552425	0.0217333
205509_at	CPB1	chr3:148791102-148860187	-0.461445	0.00300372	0.0478649
205528_s_at	RUNX1T1	chr8:91954972-92103286	0.532224	0.00132064	0.0319013
205559_s_at	PCSK5	chr9:75890644-76362975	0.695265	0.000366647	0.0181796
205560_at	PCSK5	chr9:75890644-76362975	0.34238	0.00311694	0.0488889
205581_s_at	NOS3	chr7:150991017-151014588	0.562247	0.000231165	0.0150852
205602_x_at	PSG7	chr19:42924132-42937207	-0.401718	0.00309079	0.0486573
205620_at	F10	chr13:113122799-113149529	0.538564	6.18545e-05	0.00850936
205621_at	ALKBH1	chr14:77672404-77708023	-0.510352	2.71611e-05	0.00675632
205623_at	ALDH3A1	chr17:19737984-19748943	0.461648	0.000381319	0.0181859
205650_s_at	FGA	chr4:154583126-154590742	-0.463646	0.000999435	0.0279395
205654_at	C4BPA	chr1:207104233-207144972	-0.337562	0.00316907	0.0492961
205657_at	HAAO	chr2:42767089-42792593	0.311117	0.00141274	0.0327979
205670_at	GAL3ST1	chr22:30554635-30574665	0.525161	5.1166e-05	0.00789199
205682_x_at	APOM	chr6:31643159-31648952	-0.441491	0.00292787	0.0473342
205693_at	TNNT3	chr11:1898024-1917031	0.359642	0.00123691	0.0308282
205702_at	PHTF1	chr1:113696831-113759489	-0.487753	1.9236e-05	0.00588473
205707_at	IL17RA	chr22:17084954-17115693	0.392504	0.000953488	0.0274557
205749_at	CYP1A1	chr15:74719542-74725536	-0.591824	5.06757e-05	0.00786294
205754_at	F2	chr11:46719196-46739506	0.378962	0.000114904	0.0109172
205762_s_at	DUS4L	chr7:107563617-107578656	0.36023	0.000648541	0.0230815
205804_s_at	TRAF3IP3	chr1:209756032-209782320	0.317911	0.000369849	0.0181859
205806_at	ROM1	chr11:62611722-62615116	0.512788	0.000280431	0.0164686
205816_at	ITGB8	chr7:20330702-20415754	0.331932	0.00055521	0.0217333
205831_at	CD2	chr1:116754430-116769229	-0.602346	0.000179064	0.013527
205832_at	CPA4	chr7:129933013-129964017	-0.528763	0.000590054	0.0222094
205847_at	PRSS22	chr16:2852743-2858163	0.383953	0.00045026	0.0195
205879_x_at	RET	chr10:43077064-43130351	-0.438179	0.00196099	0.0384129
205892_s_at	FABP1	chr2:88122982-88128062	0.356683	0.00135605	0.0321569
205939_at	CYP3A7	chr7:99705036-99735196	-0.323219	3.48804e-06	0.00250991
205945_at	IL6R	chr1:154405193-154469450	0.700085	0.000213833	0.0144249
205995_x_at	IQCB1	chr3:121769761-121835079	-0.399201	0.00260096	0.044967
206011_at	CASP1	chr11:105025397-105035250	0.576294	9.69027e-05	0.010403
206038_s_at	NR2C2	chr3:14947583-15053600	-0.446017	0.000735212	0.024315
206049_at	SELP	chr1:169588849-169630193	-0.491276	0.00199693	0.0389058
206057_x_at	SPN	chr16:29662979-29670876	-0.44834	0.000781345	0.0250664
206100_at	CPM	chr12:68842197-68971570	1.07192	0.00113376	0.0298563
206119_at	BHMT	chr5:79111809-79132288	-0.712279	0.00236238	0.042512
206167_s_at	ARHGAP6	chrX:11117651-11665920	0.68809	0.00250984	0.0439997
206181_at	SLAMF1	chr1:160608106-160647044	-0.350863	0.000811095	0.0254078
206207_at	CLC	chr19:39731255-39738029	-0.385752	0.00188151	0.0377554
206214_at	PLA2G7	chr6:46704201-46735693	0.565229	0.000441354	0.0193081
206215_at	OPCML	chr11:132414977-133532501	-0.445633	0.00131616	0.0318604
206225_at	ZNF507	chr19:32345594-32387667	-0.547166	0.000833953	0.0257131
206236_at	GPR4	chr19:45589764-45602212	0.523495	0.00104561	0.0287093
206248_at	PRKCE	chr2:45651345-46187990	-0.576805	0.000460945	0.019804
206254_at	EGF	chr4:109912883-110013766	0.399967	4.53466e-05	0.00758745
206259_at	PROC	chr2:127418427-127429242	0.514026	1.82602e-05	0.005795
206298_at	ARHGAP22	chr10:48446036-48656265	0.494025	7.27504e-05	0.00909591
206319_s_at	EPPIN	chr20:45540626-45547752	-0.455638	0.000523207	0.0212229
206370_at	PIK3CG	chr7:106865278-106908980	0.30484	0.000322554	0.0172756
206427_s_at	MLANA	chr9:5890889-5910606	-0.407244	0.000105212	0.0106349
206468_s_at	METTL13	chr1:171781660-171814023	-0.409988	0.0003261	0.017288
206473_at	MBTPS2	chrX:21839617-21885423	-0.404286	0.00148271	0.0336791
206478_at	FAM30A	chr14:105918750-105933413	-0.483705	0.00101313	0.0281232
206481_s_at	LDB2	chr4:16501541-16898678	-0.484301	0.00214629	0.0404988
206498_at	OCA2	chr15:27754875-28099315	-0.493022	0.0011839	0.030281
206503_x_at	PML	chr15:73994673-74047827	0.377635	0.00165968	0.0354232
206534_at	GRIN2A	chr16:9753404-10182928	-0.974404	0.000664173	0.023261
206542_s_at	SMARCA2	chr9:1980290-2193624	-0.32973	0.00151688	0.0339707
206561_s_at	AKR1B10	chr7:134527567-134541412	-0.406332	0.000220196	0.0147379
206566_at	SLC7A1	chr13:29509414-29595688	-0.353333	0.0029672	0.0476508
206571_s_at	MAP4K4	chr2:101696850-101894690	0.588624	0.000423446	0.0189462
206579_at	ZKSCAN8	chr6:28141883-28159460	-0.287799	0.000931462	0.0271303
206624_at	USP9Y	chrY:12537650-12860839	1.62469	0.000476309	0.0201415
206629_at	ADAMTSL2	chr9:133532164-133575519	0.424384	0.00126506	0.031164
206631_at	PTGER2	chr14:52314305-52328598	0.375734	0.000203559	0.0142354
206653_at	POLR3G	chr5:90471748-90514557	0.733691	0.000157132	0.0125285
206660_at	IGLL1	chr22:23573125-23580302	0.380685	0.000213941	0.0144249
206663_at	SP4	chr7:21428043-21514822	-0.448435	0.00014001	0.0119119
206668_s_at	SCAMP1	chr5:78360611-78480739	-1.00006	0.000624055	0.0227545
206672_at	AQP2	chr12:49950737-49958878	-0.41813	0.000114537	0.0109172
206686_at	PDK1	chr2:172555373-172608669	-0.440871	0.00206975	0.0396395
206699_x_at	NPAS1	chr19:47019837-47045775	0.408057	0.000700761	0.023756
206700_s_at	KDM5D	chrY:19703865-19744939	1.75509	2.97571e-05	0.00686097
206709_x_at	GPT	chr8:144502973-144507174	0.377381	9.92684e-05	0.0104693
206732_at	SLITRK3	chr3:165186720-165197109	-0.453138	0.000126765	0.011308
206745_at	HOXC11	chr12:53973126-53977643	-0.53587	0.000276238	0.0163227
206755_at	CYP2B6	chr19:40991282-41018398	-0.476632	5.40766e-05	0.00809929
206766_at	ITGA10	chr1:145891208-145910111	-0.320777	0.00152501	0.0339779
206811_at	ADCY8	chr8:130780301-131040909	0.429093	0.00128382	0.031411
206823_at	L3MBTL1	chr20:43489442-43550954	0.325495	0.000372718	0.0181859
206858_s_at	HOXC6	chr12:53990624-54030823	-0.329724	0.000832134	0.0257131
206866_at	CDH4	chr20:61894910-61940574	0.451182	0.000867213	0.0262979
206896_s_at	GNG7	chr19:2511219-2702694	0.323317	0.00286588	0.0469324
206898_at	CDH19	chr18:66501083-66604138	0.98558	0.00158264	0.0347697
206938_at	SRD5A2	chr2:31522480-31580938	0.305618	0.000195631	0.0140409
206942_s_at	PMCH	chr12:102196459-102197833	-0.308008	0.00289921	0.0470741
206945_at	LCT	chr2:135787850-135837184	-0.351682	0.00190357	0.0379068
206980_s_at	FLT3LG	chr19:49474207-49486231	0.365345	0.00106932	0.0289789
206986_at	FGF18	chr5:170846666-170884192	0.58455	0.00195525	0.0383977
207021_at	ZPBP	chr7:49850421-50121329	-0.328089	0.000213549	0.0144249
207025_at	GJC2	chr1:228149930-228159826	0.29099	0.00269249	0.0456642
207027_at	HGFAC	chr4:3441968-3449486	0.38085	0.000754761	0.0247275
207032_s_at	CRISP1	chr6:49834257-49877096	-0.318621	0.00215448	0.0405878
207035_at	SLC30A3	chr2:27253684-27275817	-0.622817	0.000379744	0.0181859
207039_at	CDKN2A	chr9:21967752-21995301	0.268407	0.000982234	0.027801
207044_at	THRB	chr3:24117153-24495756	-0.516583	0.000593537	0.0222822
207077_at	CELA2B	chr1:15465909-15491395	0.452844	0.000234901	0.0152456
207082_at	CSF1	chr1:109910242-109930992	-0.368183	0.00182448	0.0370993
207085_x_at	CSF2RA	chrX:1268800-1310381	0.571066	4.24193e-05	0.00758745
207094_at	CXCR1	chr2:218162841-218166962	-0.402741	0.000994996	0.0279179
207132_x_at	PFDN5	chr12:53268299-53293638	0.361072	0.00170482	0.0360125
207137_at	TONSL	chr8:145661992-145668562	0.414307	0.0017344	0.0363531
207176_s_at	CD80	chr3:119524293-119559614	-0.519044	0.000660073	0.0232391
207192_at	DNASE1L2	chr16:2235816-2238711	0.332667	0.00215585	0.0405878
207197_at	ZIC3	chrX:137566127-137577691	-0.342133	0.00157568	0.0346771
207204_at	FSCN2	chr17:81528377-81537130	0.57513	6.91517e-06	0.00382418
207214_at	SPINK4	chr9:33218365-33248567	-0.398135	0.00206377	0.0396021
207222_at	PLA2G10	chr16:14672547-14694674	-0.344197	0.00198429	0.0387296
207230_at	CDON	chr11:125955796-126063335	-0.430281	0.00187752	0.0377385
207251_at	MEP1B	chr18:32185069-32220404	-0.581491	2.21861e-05	0.00637999
207256_at	MBL2	chr10:52765380-52772784	-0.352586	2.10151e-05	0.00612489
207265_s_at	KDELR3	chr22:38468078-38483447	-0.510861	0.000348073	0.0177341
207274_at	CHRNE	chr17:4897771-4934438	0.426292	0.000224723	0.0148731
207281_x_at	VCX2	chrX:8169944-8171267	0.43298	0.00135134	0.0321569
207291_at	PRRG4	chr11:32829927-32858120	0.28611	0.000493881	0.02051
207321_s_at	ABCB9	chr12:122920951-122981649	-0.362977	0.00131622	0.0318604
207333_at	NMBR	chr6:142058330-142147122	-0.357404	0.000560641	0.0217333
207382_at	TP63	chr3:189631389-189897276	-0.359767	0.00218793	0.0408631
207395_at	BTN1A1	chr6:26500303-26510425	-0.442449	0.00229881	0.0418924
207462_at	GLRA2	chrX:14529298-14731812	-0.55003	0.00110448	0.0294265
207505_at	PRKG2	chr4:81087370-81215222	-0.459731	0.000575467	0.021903
207530_s_at	CDKN2B	chr9:22002903-22009305	0.556989	0.000100658	0.010513
207533_at	CCL1	chr17:34360328-34363233	-0.340754	0.00221178	0.0410344
207535_s_at	NFKB2	chr10:102394110-102402524	0.312881	0.000395869	0.0185003
207559_s_at	ZMYM3	chrX:71239624-71255146	-0.41287	0.000102659	0.0105962
207566_at	MR1	chr1:181033374-181061938	0.295168	0.00164822	0.0353711
207567_at	SLC13A2	chr17:28473293-28497781	0.34039	0.000264145	0.0159355
207630_s_at	CREM	chr10:35210416-35210750	0.546045	0.000173753	0.0134076
207640_x_at	NTN3	chr16:2471297-2474145	0.480714	7.72745e-05	0.00943758
207648_at	DRP2	chrX:101219769-101264502	-0.509903	0.00202189	0.0391613
207660_at	DMD	chrX:31097677-33339609	-0.54183	0.000557562	0.0217333
207666_x_at	SSX3	chrX:48346427-48356707	-0.348663	3.81644e-05	0.00747511
207671_s_at	BEST1	chr11:61950063-61965515	0.490871	2.19747e-05	0.0063616
207677_s_at	NCF4	chr22:36860995-36880544	0.480191	0.00105835	0.0288572
207687_at	INHBC	chr12:57434784-57452062	-0.444525	9.92588e-05	0.0104693
207703_at	NLGN4Y	chrY:14522573-14845654	1.23835	6.47795e-05	0.00865097
207722_s_at	BTBD2	chr19:1985438-2034881	0.348081	0.00145751	0.0332645
207723_s_at	KLRC3	chr12:10412312-10436001	0.661066	0.00267669	0.0455789
207738_s_at	NCKAP1	chr2:182909115-183038858	-0.614092	0.000682356	0.0234342
207780_at	CYLC2	chr9:102995311-103018488	-0.364901	7.12546e-05	0.00903991
207813_s_at	FDXR	chr17:74862497-74873031	0.503568	0.000125215	0.0112759
207817_at	IFNW1	chr9:21140632-21141832	0.348292	5.22228e-05	0.00793772
207832_at	BAIAP2	chr17:81035122-81117434	0.339202	0.00215546	0.0405878
207834_at	FBLN1	chr22:45502238-45601135	-0.466834	0.00241553	0.0429665
207835_at	FBLN1	chr22:45502238-45601135	-0.362635	0.000998685	0.0279395
207842_s_at	CASC3	chr17:40140318-40172171	0.396597	0.00107308	0.0289894
207850_at	CXCL3	chr4:74036589-74038807	0.410171	4.72975e-05	0.00778644
207857_at	LILRA2	chr19:54504943-54519583	0.526146	0.000107702	0.0107045
207860_at	NCR1	chr19:54911759-54918698	0.363889	0.00103007	0.0283911
207865_s_at	BMP8B	chr1:39757182-39788865	0.445342	1.39142e-06	0.00198019
207908_at	KRT2	chr12:52644558-52652211	-0.545464	0.000795323	0.0253557
207946_at	MAML3	chr4:140810078-140811710	0.30771	0.000296589	0.0167116
207952_at	IL5	chr5:132541445-132556838	0.315117	6.64219e-05	0.0087618
207968_s_at	MEF2C	chr5:88717117-88904257	-1.02768	0.000707519	0.0238801
207973_x_at	ACRV1	chr11:125671522-125680874	-0.432245	0.00145706	0.0332645
207980_s_at	CITED2	chr6:139371807-139374648	-1.00567	0.00206121	0.0395963
208023_at	TNFRSF4	chr1:1146871-1149512	0.343459	0.00036323	0.018162
208025_s_at	HMGA2	chr12:65824460-65966291	-0.440419	0.00130922	0.031798
208035_at	GRM6	chr5:178977587-178996206	-0.685033	3.29007e-07	0.000886981
208044_s_at	PPARD	chr6:35342558-35428191	0.343311	0.00211404	0.0400655
208048_at	TACR1	chr2:75046463-75199520	0.320931	0.00310911	0.0488211
208106_x_at	PSG6	chr19:42902086-42919563	-0.580233	0.000890383	0.026579
208113_x_at	PABPC3	chr13:25096136-25099254	0.581675	0.000776015	0.0249964
208132_x_at	PRRC2A	chr6:31602891-31619942	0.351565	0.00188936	0.0378315
208142_at	EDDM3A	chr14:20745887-20748380	0.329559	5.82425e-05	0.00837167
208182_x_at	IFNA14	chr9:21216373-21217311	-0.394677	0.0019293	0.038087
208203_x_at	KIR2DS5	chr19:98134-113011	-0.61087	0.00011898	0.0109897
208240_s_at	FGF1	chr5:142592178-142698070	0.897211	4.41372e-05	0.00758745
208253_at	SIGLEC8	chr19:51450847-51458456	0.464132	0.000359692	0.0180831
208262_x_at	MEFV	chr16:3242027-3256633	-0.44685	0.00128548	0.0314339
208265_at	C2orf83	chr2:227610090-227642365	0.323861	0.000177129	0.013447
208288_at	ABCB11	chr2:168939927-168953422	0.295218	0.00177189	0.0367158
208300_at	PTPRH	chr19:55181247-55209506	0.39667	0.000176682	0.013447
208317_at	XYLB	chr3:38388239-38442777	0.311206	0.000302431	0.0168371
208333_at	LHX5	chr12:113462033-113472280	0.411109	0.000586691	0.0221408
208379_x_at	NPY2R	chr4:156129018-156137082	-0.443118	0.000863629	0.0262522
208384_s_at	MID2	chrX:107825755-107931637	-0.520009	0.000305602	0.016888
208426_x_at	KIR2DL4	chr19:54803610-54814517	-0.377434	0.00113912	0.0298777
208427_s_at	ELAVL2	chr9:23690104-23826337	-1.05906	3.82983e-05	0.00747511
208436_s_at	IRF7	chr11:612805-616257	0.628109	0.00108756	0.0291185
208450_at	LGALS2	chr22:37570248-37582616	0.382025	0.00151534	0.0339553
208461_at	HIC1	chr17:2054154-2063241	0.472788	0.00057582	0.021903
208474_at	CLDN6	chr16:3014712-3020071	0.585079	4.48033e-05	0.00758745
208492_at	RFXAP	chr13:36819222-36829104	0.479594	0.000204195	0.0142354
208524_at	GPR15	chr3:98531978-98534681	-0.414212	0.000417629	0.0188435
208530_s_at	RARB	chr3:24687887-25597932	-0.77014	0.00129202	0.03154
208532_x_at	KRTAP5-8	chr11:71538025-71539209	-0.468875	0.00232808	0.0421232
208545_x_at	TAF4	chr20:61950345-62005079	0.392448	0.000415113	0.0188435
208547_at	H2BC3	chr6:26043227-26043713	0.275367	0.000879206	0.0264278
208564_at	KCNA2	chr1:110519837-110631474	-0.347785	0.00111799	0.0296474
208573_s_at	OR2H2	chr6:29587257-29588840	-0.476649	0.00175555	0.0365747
208595_s_at	MBD1	chr18:50266882-50281774	-0.388062	0.00220943	0.0410215
208605_s_at	NTRK1	chr1:156815636-156881850	0.424387	0.00145886	0.0332776
208616_s_at	PTP4A2	chr1:31906421-31944856	0.562014	0.000294617	0.0167116
208627_s_at	YBX1	chr14:66012830-66013789	0.562576	0.00157705	0.0346896
208628_s_at	YBX1	chr14:66012830-66013789	0.562584	0.00195002	0.0383672
208703_s_at	APLP2	chr11:130068147-130144811	-0.366052	0.000214025	0.0144249
208761_s_at	SUMO1	chr2:202206182-202238599	-0.370109	0.00111826	0.0296474
208795_s_at	MCM7	chr7:100092728-100101940	0.482682	0.000225934	0.0149017
208841_s_at	G3BP2	chr4:75641849-75724589	-0.503344	0.0013382	0.0319974
208846_s_at	VDAC3	chr8:42391624-42405937	-0.383726	0.00191039	0.0379068
208887_at	EIF3G	chr19:10115014-10119918	0.394658	0.000622641	0.0227414
208915_s_at	GGA2	chr16:23463542-23521995	-0.477737	3.24775e-05	0.006898
208947_s_at	UPF1	chr19:18831959-18868230	0.367949	0.000271602	0.0161371
208957_at	ERP44	chr9:99979185-100099052	-0.303354	0.00113667	0.0298777
209057_x_at	CDC5L	chr6:44387706-44450425	-0.611353	0.00158623	0.0347978
209062_x_at	NCOA3	chr20:47501887-47656877	-0.373184	0.00294995	0.0475594
209097_s_at	JAG1	chr20:10637684-10673999	0.437125	0.000140458	0.0119265
209110_s_at	RGL2	chr6:33269579-33277249	0.433249	0.00223112	0.0412095
209113_s_at	HMG20B	chr19:3572777-3579088	0.37022	0.00225993	0.0414993
209114_at	TSPAN1	chr1:46175073-46185962	-0.430819	0.000561282	0.0217333
209119_x_at	NR2F2	chr15:96325938-96340263	0.699429	0.000289534	0.0166299
209123_at	QDPR	chr4:17460261-17512206	0.563196	0.00218774	0.0408631
209146_at	MSMO1	chr4:165327667-165343164	0.703519	0.000550329	0.0217333
209152_s_at	TCF3	chr19:1609291-1652615	0.376582	2.05549e-05	0.00607283
209153_s_at	TCF3	chr19:1609291-1652615	0.474271	0.000705215	0.023821
209160_at	AKR1C3	chr10:5035354-5107686	0.932559	0.00216029	0.0405878
209171_at	ITPA	chr20:3208868-3223870	-0.621541	1.39199e-05	0.00525057
209193_at	PIM1	chr6:37170152-37175428	0.437386	0.0015059	0.0339005
209213_at	CBR1	chr21:36069941-36073166	0.673335	0.000618399	0.022644
209238_at	STX3	chr11:59713456-59805882	-0.430859	0.000108348	0.0107193
209266_s_at	SLC39A8	chr4:102251080-102431258	0.642726	0.00173562	0.0363531
209281_s_at	ATP2B1	chr12:89588049-89709366	-0.749315	0.00104858	0.0287361
209282_at	PRKD2	chr19:46674275-46717127	0.461265	0.00146255	0.0333266
209283_at	CRYAB	chr11:111908564-111923722	1.04426	0.00133409	0.0319954
209295_at	TNFRSF10B	chr8:23020133-23069031	0.643938	0.00166357	0.035461
209309_at	AZGP1	chr7:99966720-99976042	0.792217	0.00302308	0.0480158
209327_s_at	NOP16	chr5:175815757-175816769	0.299827	0.00281412	0.0463345
209357_at	CITED2	chr6:139371807-139374648	-1.10231	7.48978e-05	0.00928367
209385_s_at	PLPBP	chr8:37762595-37779768	0.371824	0.000965932	0.0275565
209398_at	H1-2	chr6:26055740-26056470	0.822418	0.00182766	0.0370993
209407_s_at	DEAF1	chr11:646472-677067	0.459342	0.00150682	0.0339005
209417_s_at	IFI35	chr17:43006740-43014456	0.557867	0.00109471	0.0292509
209448_at	HTATIP2	chr11:20363685-20383782	0.613366	0.000769807	0.0249292
209449_at	LSM2	chr6:31784754-31794345	0.463748	0.000420863	0.0189301
209474_s_at	ENTPD1	chr10:95711779-95877266	0.418417	0.0030006	0.0478591
209528_s_at	TELO2	chr16:1493344-1510457	0.370089	0.00105326	0.0287777
209569_x_at	NSG1	chr4:4348140-4419058	-0.785258	0.00324962	0.0499723
209586_s_at	PRUNE1	chr1:151008420-151035713	-0.333799	0.00177808	0.0367208
209587_at	PITX1	chr5:135027734-135034813	0.372905	0.000879803	0.0264278
209594_x_at	PSG9	chr19:43211791-43269530	-0.582988	0.00244897	0.0433411
209598_at	PNMA2	chr8:26504701-26514092	-0.266235	0.00165008	0.0353934
209604_s_at	GATA3	chr10:8045378-8075198	-0.400327	0.000310572	0.0169791
209636_at	NFKB2	chr10:102394110-102402524	0.71507	3.85735e-06	0.0025998
209661_at	KIFC3	chr16:57758217-57863053	0.435107	0.000961966	0.0274979
209697_at	PPP3CC	chr8:22298594-22398638	0.549549	0.00143881	0.0330649
209729_at	GAS2L1	chr22:29306618-29312787	0.374646	0.00247325	0.0436325
209742_s_at	MYL2	chr12:110910819-110921443	0.331476	0.000656588	0.0231957
209755_at	NMNAT2	chr1:183248237-183418380	-0.666378	0.000672182	0.0232957
209757_s_at	MYCN	chr2:15940550-15947007	0.295069	0.00224125	0.0412971
209768_s_at	SEPT5-GP1BB	chr22:19714503-19724224	0.44684	0.00215787	0.0405878
209775_x_at	SLC19A1	chr21:45493572-45573365	0.565756	2.26748e-05	0.00639267
209851_at	ZC3H13	chr13:45954465-46052759	-0.599519	7.61713e-06	0.0040123
209854_s_at	KLK2	chr19:50861568-50880567	0.37132	8.92506e-05	0.00998828
209861_s_at	METAP2	chr12:95473520-95515839	0.286325	0.000930124	0.0271303
209882_at	RIT1	chr1:155897808-155911404	0.598685	0.000897995	0.0266887
209915_s_at	NRXN1	chr2:49918503-51225575	-0.7862	0.000266278	0.0159971
209942_x_at	MAGEA3	chrX:152698767-152702347	-0.325351	0.00205593	0.039555
209992_at	PFKFB2	chr1:207034366-207081024	-0.466602	0.000357375	0.0180619
210016_at	MYT1L	chr2:1789113-2331664	-0.447099	0.000641248	0.023031
210030_at	DOHH	chr19:3490821-3500621	0.393877	0.000728519	0.0242647
210064_s_at	UPK1B	chr3:119173517-119205143	-0.522665	0.00318349	0.0494533
210065_s_at	UPK1B	chr3:119173517-119205143	-0.458958	0.000990563	0.0278903
210124_x_at	SEMA4F	chr2:74654228-74683853	-0.386539	0.000277603	0.0163762
210125_s_at	BANF1	chr11:66002228-66004149	0.369447	0.000532251	0.0214567
210144_at	TBC1D22A	chr22:46762617-47175699	0.337497	0.00150657	0.0339005
210146_x_at	LILRB2	chr19:54274450-54281944	0.348722	0.000268622	0.0160231
210152_at	LILRB4	chr19:54594151-54602395	0.357954	0.00318431	0.0494533
210155_at	MYOC	chr1:171635417-171652688	-0.485556	0.00122196	0.0306626
210158_at	ERCC4	chr16:13920138-13952348	-0.449524	0.00198963	0.0387987
210176_at	TLR1	chr4:38790677-38856817	0.913963	3.49124e-06	0.00250991
210189_at	HSPA1L	chr6:31796990-31802435	-0.468993	0.00292511	0.0473096
210201_x_at	BIN1	chr2:127048027-127107288	0.492892	0.000767952	0.0249252
210202_s_at	BIN1	chr2:127048027-127107288	0.494297	0.0010547	0.0287907
210216_x_at	RAD1	chr5:34905260-34918989	-0.327022	0.00259224	0.0448521
210270_at	RGS6	chr14:71932429-72566530	-0.505023	0.000585026	0.0221062
210297_s_at	MSMB	chr10:46033307-46048180	0.34629	3.32081e-06	0.00250991
210312_s_at	IFT20	chr17:28328325-28335489	0.481761	0.000664995	0.023261
210331_at	HECW1	chr7:43112629-43566001	-0.62639	0.00202626	0.0391765
210344_at	OSBPL7	chr17:47807372-47821834	0.396391	0.00034551	0.0177341
210356_x_at	MS4A1	chr11:60455846-60470752	-0.469114	0.000610822	0.0225864
210362_x_at	PML	chr15:73994673-74047827	0.315899	0.00183908	0.0372436
210388_at	PLCB2	chr15:40278176-40307935	-0.287406	0.0028098	0.0463345
210430_x_at	RHD	chr1:25272393-25330445	-0.390206	0.00069923	0.023756
210441_at	CDC14A	chr1:100345001-100520277	-0.34699	0.00277836	0.0461993
210442_at	IL1RL1	chr2:102311502-102352037	-0.507247	0.00208215	0.0397581
210444_at	NPY6R	chr5:137801193-137810755	-0.422535	0.00261487	0.0450629
210463_x_at	TRMT1	chr19:13104902-13117567	0.362127	0.0011977	0.0304183
210467_x_at	MAGEA12	chrX:152733757-152737669	-0.269201	0.00160548	0.0349584
210537_s_at	TADA2A	chr17:37411498-37484368	0.555228	4.3321e-05	0.00758745
210547_x_at	ICA1	chr7:8113184-8262687	-0.396162	0.000998911	0.0279395
210548_at	CCL23	chr17:36013092-36018001	-0.276056	0.0029912	0.047855
210549_s_at	CCL23	chr17:36013092-36018001	0.327544	6.46605e-05	0.00865097
210559_s_at	CDK1	chr10:60778331-60794852	-0.380893	0.000694253	0.0236919
210616_s_at	SEC31A	chr4:82818509-82901166	0.310995	0.0030814	0.0485627
210654_at	TNFRSF10D	chr8:23135588-23164027	0.365377	0.000263813	0.0159355
210657_s_at	SEPTIN4	chr17:58520250-58544368	0.81272	0.00203378	0.0392514
210683_at	NRTN	chr19:5805067-5828324	0.324405	0.000252676	0.0156698
210727_at	CALCA	chr11:14966622-14972354	-0.317016	0.000216123	0.0145437
210728_s_at	CALCA	chr11:14966622-14972354	0.290455	0.00112792	0.029783
210772_at	FPR2	chr19:51752026-51770531	0.311604	0.00264016	0.0453357
210796_x_at	SIGLEC6	chr19:51517819-51531856	-0.5447	0.000693536	0.0236862
210808_s_at	NOX1	chrX:100843324-100874359	0.301773	0.00290059	0.0470741
210811_s_at	DDX49	chr19:18919705-18929189	0.503762	0.00106353	0.028907
210826_x_at	RAD17	chr5:69369307-69415042	-0.494442	8.60125e-05	0.00973805
210836_x_at	PDE4D	chr5:58969038-60522120	-0.431909	0.00145472	0.033236
210846_x_at	TRIM14	chr9:98069275-98119222	0.316805	0.0016591	0.0354232
210853_at	SCN11A	chr3:38845764-39052157	-0.366984	1.42417e-05	0.00525057
210871_x_at	SSX2IP	chr1:84643706-84690803	-0.731222	5.61067e-05	0.00823603
210876_at	ANXA2P1	chr4:153307792-153308717	0.338052	0.00289656	0.0470741
210908_s_at	PFDN5	chr12:53268299-53293638	0.352585	0.00314508	0.0490467
210912_x_at	GSTM4	chr1:109656099-109665496	-0.524873	8.7684e-06	0.00433826
210938_at	PDX1	chr13:27920000-27926313	0.324503	0.00167433	0.0355775
210963_s_at	GYG2	chrX:2828822-2882820	-0.410264	0.000411849	0.018799
210971_s_at	ARNTL	chr11:13276652-13387266	-0.750738	0.00107063	0.0289789
210983_s_at	MCM7	chr7:100092728-100101940	0.536619	0.00163003	0.0351992
210987_x_at	TPM1	chr15:63042632-63071915	-0.602404	0.000203113	0.0142354
210989_at	LAMA4	chr6:112107931-112254939	-0.314196	0.000348226	0.0177341
210998_s_at	HGF	chr7:81699010-81770438	0.769688	2.3533e-08	0.000338365
211001_at	TRIM29	chr11:120111286-120185529	-0.335149	0.00180062	0.0368782
211002_s_at	TRIM29	chr11:120111286-120185529	0.290138	0.000969369	0.0275634
211009_s_at	ZNF271P	chr18:35290276-35328390	0.616161	0.00180223	0.0368782
211025_x_at	COX5B	chr2:97646062-97648383	0.322872	0.000817196	0.0254511
211031_s_at	CLIP2	chr7:74289407-74405935	0.516521	0.00108167	0.029073
211033_s_at	PEX7	chr6:136822564-136913934	-0.420224	0.00252426	0.0440928
211037_s_at	MBOAT7	chr19:54173853-54190413	-0.355854	0.00322183	0.04973
211049_at	TLX2	chr2:74513463-74517148	0.366821	0.00143397	0.0329891
211109_at	JAK3	chr19:17824780-17848071	0.382275	0.00031132	0.0169985
211111_at	HGC6.3	chr6:167975924-167979776	0.516769	9.31075e-06	0.00440423
211114_x_at	GEMIN2	chr14:39114285-39136973	-0.431052	0.00101327	0.0281232
211141_s_at	CNOT3	chr19:54138182-54156191	0.449506	0.00135564	0.0321569
211145_x_at	IFNA21	chr9:21165637-21166660	-0.414462	0.00228516	0.0417671
211149_at	UTY	chrY:13234577-13480673	0.682124	0.000100198	0.010513
211175_at	GPR45	chr2:105241743-105243467	0.336907	8.55432e-05	0.0097359
211191_at	CD84	chr1:160541095-160579516	0.34678	0.00105273	0.0287777
211205_x_at	PIP5K1A	chr1:151197949-151249536	-0.500886	0.000827568	0.0256445
211226_at	GALR2	chr17:76074781-76077537	0.379763	0.00267211	0.0455789
211228_s_at	RAD17	chr5:69369307-69415042	-0.469455	4.5734e-05	0.00758745
211259_s_at	BMP7	chr20:57168753-57266641	0.415889	0.000295808	0.0167116
211285_s_at	UBE3A	chr15:25333728-25439051	0.577242	0.000176237	0.013447
211304_x_at	KCNJ5	chr11:128761358-128787872	-0.40329	9.32281e-06	0.00440423
211319_at	RAE1	chr20:55926311-55953311	0.538283	5.29917e-05	0.0079923
211337_s_at	TUBGCP4	chr15:43369221-43409771	-0.694403	0.000525833	0.0212575
211356_x_at	LEPR	chr1:65420652-65641559	-0.76871	0.00189959	0.0379068
211367_s_at	CASP1	chr11:105025397-105035250	0.763862	0.000156104	0.0124927
211368_s_at	CASP1	chr11:105025397-105035250	0.687023	0.00230862	0.0420104
211397_x_at	KIR2DL2	chr19:21928-36334	-0.474611	0.00279784	0.0463066
211405_x_at	IFNA17	chr9:21206181-21207143	-0.634133	0.000142762	0.0119574
211438_at	TRHR	chr8:109086585-109121565	-0.481119	0.000383048	0.0182116
211444_at	SUMO2	chr17:75165586-75182959	-0.289708	0.00244965	0.0433411
211446_at	RGSL1	chr1:182409192-182560599	-0.343432	0.000402378	0.0186037
211512_s_at	OGFR	chr20:62804835-62814000	0.441719	0.000759064	0.0247672
211513_s_at	OGFR	chr20:62804835-62814000	0.665204	1.26284e-06	0.00187837
211532_x_at	KIR2DS2	chr19:54832676-54848569	-0.453358	0.00161512	0.0350517
211553_x_at	APAF1	chr12:98645290-98735433	-0.303766	0.00169089	0.0357883
211571_s_at	VCAN	chr5:83471618-83582303	0.751388	0.00187429	0.0377088
211605_s_at	RARA	chr17:40309180-40357643	0.498108	2.43687e-06	0.00229722
211610_at	KLF6	chr10:3775996-3785281	-0.428861	0.000948237	0.0274143
211627_x_at	ESR1	chr6:152128807-152183865	0.364156	4.40121e-05	0.00758745
211682_x_at	UGT2B28	chr4:69408828-69423164	-0.386564	0.000616438	0.0226384
211697_x_at	PNO1	chr2:68157888-68176238	-0.620697	0.0011779	0.0302792
211698_at	EID1	chr15:48878134-48880173	-0.476308	0.00196191	0.0384129
211705_s_at	SORBS1	chr10:95311771-95561414	0.362825	0.00295313	0.0475834
211773_s_at	ZKSCAN3	chr6:28349947-28369172	-0.527997	0.000369651	0.0181859
211794_at	FYB1	chr5:39105252-39274528	0.378793	0.00148666	0.0337333
211795_s_at	FYB1	chr5:39105252-39274528	0.73383	0.000156473	0.012499
211800_s_at	USP4	chr3:49277144-49340712	0.360052	0.00165625	0.0354201
211806_s_at	KCNJ15	chr21:38155549-38307357	-0.54579	2.41759e-05	0.006493
211831_s_at	THPO	chr3:184371935-184381968	-0.440939	0.00289406	0.0470741
211832_s_at	MDM2	chr12:68808177-68845544	0.277881	0.00122885	0.0307284
211877_s_at	PCDHGA11	chr5:141421047-141512975	0.389513	0.000206285	0.0142369
211918_x_at	PAPPA2	chr1:176463171-176845601	-0.524256	0.00137947	0.0325333
211920_at	CFB	chr6:31938304-31944738	0.429082	0.00142865	0.0329247
211926_s_at	MYH9	chr22:36281280-36388010	0.454824	0.00018937	0.0139547
211948_x_at	PRRC2C	chr1:171485530-171593511	0.635532	0.00279694	0.0463066
211965_at	ZFP36L1	chr14:68787660-68796253	0.762147	0.00172049	0.0362193
211974_x_at	RBPJ	chr4:26163455-26435131	0.372409	0.00279005	0.0462938
211988_at	SMARCE1	chr17:40627356-40665141	0.412307	0.00133738	0.0319954
211994_at	WNK1	chr12:752579-911452	0.471451	0.00125236	0.0310101
212006_at	UBXN4	chr2:135741734-135785056	0.505909	0.000957081	0.0274677
212008_at	UBXN4	chr2:135741734-135785056	0.586082	0.00289797	0.0470741
212024_x_at	FLII	chr17:18244815-18258738	0.391966	3.08222e-05	0.00686097
212096_s_at	MTUS1	chr8:17643795-17801094	0.697937	0.00303893	0.048175
212134_at	PHLDB1	chr11:118606440-118658031	0.375547	0.00100793	0.0280678
212147_at	SMG5	chr1:156249224-156282825	0.388785	0.000958998	0.0274677
212213_x_at	OPA1	chr3:193593144-193697811	-0.37311	0.000253565	0.0156698
212215_at	PREPL	chr2:44316281-44361862	-0.272561	0.00115816	0.0299665
212235_at	PLXND1	chr3:129555214-129606676	0.382149	0.00243605	0.0431742
212255_s_at	ATP2C1	chr3:130850595-131016712	0.491474	0.00280346	0.0463066
212256_at	GALNT10	chr5:154190730-154420984	0.539402	0.000443415	0.019359
212278_x_at	UBE3A	chr15:25333728-25439051	0.653441	3.12658e-05	0.00686097
212301_at	RTF1	chr15:41408408-41483563	-0.415203	9.86689e-05	0.0104693
212310_at	MIA3	chr1:222618097-222668007	-0.464014	0.00142965	0.0329247
212315_s_at	NUP210	chr3:13316235-13420322	0.410618	0.000190597	0.0140058
212318_at	TNPO3	chr7:128954180-129055173	0.305925	0.0029731	0.0476746
212338_at	MYO1D	chr17:32492522-32877177	0.76814	0.00125836	0.0311235
212395_s_at	EMC1	chr1:19215660-19251552	-0.316408	0.00196269	0.0384129
212417_at	SCAMP1	chr5:78360611-78480739	-0.731866	0.00175719	0.0365812
212418_at	ELF1	chr13:40931924-41061440	0.716868	0.00110765	0.0294566
212419_at	ZCCHC24	chr10:79382325-79445624	0.732708	0.00274664	0.0460686
212423_at	ZCCHC24	chr10:79382325-79445624	0.716009	0.00198284	0.0387187
212437_at	CENPB	chr20:3783851-3786740	0.487371	0.00265161	0.0454673
212444_at	GPRC5A	chr12:12891559-12917937	-0.479947	5.55073e-05	0.00819968
212512_s_at	CARM1	chr19:10871553-10923075	0.784933	2.47958e-05	0.00656177
212515_s_at	DDX3X	chr8:27063996-27065278	-0.558084	0.00122402	0.0306671
212517_at	ATRN	chr20:3471018-3651118	-0.569226	4.97963e-06	0.0030253
212561_at	DENND5A	chr11:9138825-9265959	0.391549	0.0013116	0.03182
212566_at	MAP4	chr3:47850690-48089272	0.5244	0.00172236	0.036241
212572_at	STK38L	chr12:27243968-27325959	-0.531158	0.000511483	0.0209524
212594_at	PDCD4	chr10:110871795-110900006	0.5388	0.0016183	0.0350957
212596_s_at	HMGXB4	chr22:35257452-35295807	0.407469	0.0026686	0.0455789
212607_at	AKT3	chr1:243488233-243855434	-0.429137	0.000772799	0.0249515
212624_s_at	CHN1	chr2:174798809-175005381	-0.339732	0.000186078	0.0138308
212626_x_at	HNRNPC	chr2:189923336-189924216	0.350697	0.00109452	0.0292509
212662_at	PVR	chr19:44643798-44666162	0.433018	0.000812475	0.0254141
212673_at	METAP1	chr4:98995659-99062809	-0.360006	0.000606666	0.0225864
212680_x_at	PPP1R14B	chr11:64244479-64246943	0.478883	0.000114575	0.0109172
212722_s_at	JMJD6	chr17:76712832-76726799	0.612472	8.00868e-05	0.00943864
212723_at	JMJD6	chr17:76712832-76726799	0.78627	0.00021926	0.0147089
212727_at	DLG3	chrX:70444835-70505490	-0.520086	7.75618e-05	0.00943758
212757_s_at	CAMK2G	chr10:73812501-73874591	-0.489719	5.02761e-05	0.00786294
212778_at	PACS2	chr14:105300563-105398147	0.559831	0.000135834	0.0117184
212799_at	STX6	chr1:180972712-181023121	-0.310996	0.000204282	0.0142354
212809_at	NFATC2IP	chr16:28950807-28967092	-0.345981	0.00114333	0.0299055
212829_at	PIP4K2A	chr10:22534854-22714578	0.757559	0.00131792	0.0318709
212837_at	ABRAXAS2	chr10:124801819-124836667	-0.355072	0.00194017	0.0382143
212879_x_at	PIAS4	chr19:4007736-4039386	0.316749	0.00126044	0.0311275
212881_at	PIAS4	chr19:4007736-4039386	0.438598	0.00321342	0.04973
212887_at	SEC23A	chr14:39031919-39109646	-0.591227	0.00108391	0.0290813
212909_at	LYPD1	chr2:132643286-132671579	0.633087	0.00118236	0.030281
212915_at	PDZRN3	chr3:73382431-73624941	-0.545958	0.00269274	0.0456642
212938_at	COL6A1	chr21:45981770-46005050	0.340202	0.00151093	0.0339376
212942_s_at	CEMIP	chr15:80779343-80951776	-1.05504	0.000756481	0.0247275
212949_at	NCAPH	chr2:96335766-96377091	-0.394015	0.000177381	0.013447
212962_at	SYDE1	chr19:15107401-15114985	0.43301	2.6351e-05	0.00669109
212972_x_at	APBB2	chr4:40810027-41216714	-0.445765	0.00120804	0.0304599
212985_at	APBB2	chr4:40810027-41216714	0.494681	0.000802974	0.0253737
213006_at	CEBPD	chr8:48648641-48650235	0.721168	0.000951934	0.0274293
213050_at	COBL	chr7:51016212-51316818	0.384776	0.000563676	0.0217869
213052_at	PRKAR2A	chr3:48744597-48847874	-0.4185	0.00230977	0.0420104
213071_at	DPT	chr1:168695468-168729206	0.297083	0.00119989	0.030426
213072_at	CYHR1	chr8:144449582-144462871	0.462399	0.000321434	0.0172756
213138_at	ARID5A	chr2:96536743-96552634	0.416125	0.0024131	0.0429499
213182_x_at	CDKN1C	chr11:2883205-2885904	0.998689	6.74416e-05	0.00877335
213197_at	ASTN1	chr1:176857302-177164973	-0.285799	0.000436811	0.0191953
213256_at	MARCHF3	chr5:126867714-127030558	0.610429	0.000131333	0.0115378
213268_at	CAMTA1	chr1:6785454-7769706	-0.563028	0.000871475	0.0263359
213285_at	TMEM30B	chr14:61277370-61281761	-0.749565	0.0010234	0.0283341
213290_at	COL6A2	chr21:46098112-46132848	0.337011	0.00170236	0.0359782
213319_s_at	YBX3	chr12:10851687-10871743	0.395245	0.0021345	0.0403293
213329_at	SRGAP2	chr1:206203346-206464436	0.52474	7.89877e-05	0.00943758
213334_x_at	HAUS7	chrX:153444473-153470587	0.451252	0.000805445	0.0253737
213354_s_at	NR2F6	chr19:17343192-17346865	0.282103	0.000995425	0.0279179
213375_s_at	N4BP2L1	chr13:32400723-32428311	-0.432368	0.00076159	0.0247837
213404_s_at	RHEB	chr10:47706203-47706802	-0.3794	0.00209377	0.0398872
213407_at	PHLPP2	chr16:71637835-71724701	-0.397625	0.000814567	0.0254427
213414_s_at	RPS19	chr19:41860255-41872925	0.442412	0.00309791	0.0487162
213426_s_at	CAV2	chr7:116139813-116146986	0.358336	0.00113461	0.0298605
213474_at	KCTD7	chr7:66628881-66649067	0.329874	0.00287503	0.0469574
213475_s_at	ITGAL	chr16:30472658-30523567	0.368851	0.000698399	0.023756
213488_at	SNED1	chr2:240998618-241095568	-0.631098	5.14118e-05	0.00789199
213527_s_at	ZNF688	chr16:30569672-30572734	0.433942	0.000376573	0.0181859
213533_at	NSG1	chr4:4348140-4419058	-0.708187	0.000824924	0.0255993
213568_at	OSR2	chr8:98944403-98952104	0.34126	0.00225877	0.0414957
213571_s_at	EIF4E2	chr2:232550659-232583644	0.512981	0.000520729	0.0211597
213654_at	TAF5L	chr1:229593134-229626122	-0.268346	0.00192218	0.0379987
213680_at	KRT6B	chr12:52446651-52452146	-0.388096	0.00212676	0.0402536
213681_at	CYHR1	chr8:144449582-144462871	0.386482	6.21409e-05	0.00850936
213683_at	ACSL6	chr5:131949973-132012243	-0.569573	0.00184828	0.0373948
213724_s_at	PDK2	chr17:50094737-50112152	-0.46336	0.000713963	0.0239664
213740_s_at	TMEM262	chr11:65084979-65089375	0.538841	0.000295064	0.0167116
213745_at	ATRNL1	chr10:115093365-115948999	-0.775696	0.00131814	0.0318709
213760_s_at	ZNF330	chr4:141220887-141234697	-0.370779	0.00104158	0.0286351
213790_at	ADAM12	chr10:126012381-126388477	0.377392	0.000293252	0.0166879
213798_s_at	CAP1	chr1:40040233-40072649	0.567416	0.00100647	0.0280453
213817_at	IRAK3	chr12:66189195-66254622	0.61255	0.000363366	0.018162
213819_s_at	FLOT1	chr6:30698462-30709077	-0.610743	1.46902e-06	0.00198019
213830_at	YME1L1	chr14:22918116-22935569	-0.407463	0.000805912	0.0253737
213841_at	TNR	chr1:175315194-175743616	0.49446	0.00325354	0.0499792
213844_at	HOXA5	chr7:27141052-27143681	-0.357361	0.000983693	0.027824
213895_at	EMP1	chr12:13196723-13219941	0.366208	4.48078e-05	0.00758745
213907_at	EEF1E1	chr6:8080081-8102748	-0.354861	0.00171685	0.0362136
213928_s_at	AGFG1	chr2:228337041-228388515	0.507424	0.000346145	0.0177341
213960_at	NTRK3	chr15:87859751-88256791	-0.433558	0.00089011	0.026579
213973_at	RRBP1	chr20:17600313-17602345	-0.278179	0.00294122	0.0474811
214008_at	TWF1	chr12:44190872-44200060	-0.352108	2.92032e-05	0.00686097
214036_at	EFNA5	chr5:107376894-107670937	-0.498188	7.96881e-05	0.00943864
214037_s_at	CCDC22	chrX:49235470-49250520	0.384822	0.00192038	0.0379966
214044_at	RYR2	chr1:237042184-237833988	-0.795246	0.000289067	0.0166299
214062_x_at	NFKBIB	chr19:38899736-38908929	0.355642	0.00044488	0.0193749
214075_at	NENF	chr1:212432920-212446379	0.318381	0.00201244	0.0390317
214098_at	BTBD8	chr1:92080305-92184725	-0.862576	0.000106046	0.0106379
214144_at	POLR2D	chr2:127843553-127858155	0.450669	0.00314424	0.0490467
214192_at	NUP88	chr17:5359668-5420164	-0.567662	0.000372057	0.0181859
214218_s_at	XIST	chrX:73821657-73821724	-4.62815	2.68586e-07	0.000881315
214220_s_at	ALMS1	chr2:73385758-73625166	0.445276	0.000262469	0.0159355
214234_s_at	CYP3A5	chr7:99648194-99679998	-0.478393	0.00113044	0.0298053
214256_at	ATP10A	chr15:25677273-25865184	-0.413284	0.00278341	0.046249
214276_at	KLF12	chr13:73686089-74134404	-0.275426	0.00132498	0.0319186
214283_at	TMEM97	chr17:28319200-28328685	-0.374222	0.00306062	0.0483412
214296_x_at	IZUMO4	chr19:2096429-2099593	0.447455	0.000247034	0.0155517
214312_at	FOXA2	chr20:22562134-22563036	0.321455	0.00207464	0.0396707
214322_at	CAMK2G	chr10:73812501-73874591	-0.587363	3.28104e-05	0.006898
214352_s_at	KRAS	chr12:25205246-25250936	-0.528691	0.0026589	0.0455487
214370_at	S100A8	chr1:153362507-153363034	0.349763	0.00115206	0.0299318
214393_at	RND2	chr17:43025231-43032041	0.553913	5.13647e-05	0.00789199
214420_s_at	CYP2C9	chr10:96707539-96749039	0.305549	0.000833637	0.0257131
214438_at	HLX	chr1:220786990-220884503	0.405444	0.000423285	0.0189462
214439_x_at	BIN1	chr2:127048027-127107288	0.553449	0.000565096	0.0218057
214451_at	TFAP2B	chr6:50818723-50847619	0.37347	0.000833412	0.0257131
214497_s_at	NHLH2	chr1:115836377-115843917	0.470871	6.77667e-05	0.00877813
214531_s_at	SNX1	chr15:64094123-64146090	0.491551	0.00247421	0.0436325
214569_at	IFNA5	chr9:21304326-21305313	-0.272596	0.00323074	0.0498241
214571_at	FGF3	chr11:69809968-69819416	0.298835	0.00163041	0.0351992
214596_at	CHRM3	chr1:239386565-239915452	-0.7812	0.000142502	0.0119574
214616_at	H3C6	chr6:26224199-26227473	-0.437484	0.000960198	0.0274838
214631_at	ZBTB33	chrX:120250752-120258398	0.331153	0.000360253	0.0180903
214632_at	NRP2	chr2:205681990-205798133	0.432382	0.000358673	0.0180831
214634_at	H4C9	chr6:27107065-27108081	0.414975	0.000194637	0.0140169
214641_at	COL4A3	chr2:227164624-227314792	-0.407255	0.00105121	0.0287714
214646_at	H3C12	chr6:27890315-27893106	-0.440377	0.00121522	0.0305646
214678_x_at	ZFX	chrX:24149173-24216255	-0.480024	0.000486666	0.0204007
214699_x_at	WIPI2	chr7:5190196-5233840	-0.37283	0.000485534	0.0203731
214737_x_at	HNRNPC	chr2:189923336-189924216	0.34751	0.00192395	0.0380128
214754_at	TET3	chr2:73984910-74108176	-0.371053	0.00155725	0.0344118
214808_at	TRIM56	chr7:101085481-101097967	0.426468	0.0014208	0.0328698
214838_at	SFT2D2	chr1:168225938-168253021	-0.439429	0.000942111	0.0273105
214842_s_at	ALB	chr4:74270005-74286782	-0.28381	0.00313572	0.0489785
214856_at	SPTBN1	chr2:54661011-54680045	0.317192	0.00158632	0.0347978
214859_at	FSTL4	chr5:133196455-133612541	-0.447576	4.28795e-05	0.00758745
214868_at	PIWIL1	chr12:130337887-130372618	0.325873	0.000643153	0.0230464
214906_x_at	N4BP2L1	chr13:32400723-32428311	-0.577699	1.51035e-05	0.00529072
214909_s_at	DDAH2	chr6:31714445-31718024	0.558814	8.10598e-05	0.00947698
214915_at	ZNF362	chr1:33256492-33300719	0.334092	0.000918344	0.0269875
214923_at	ATP6V1D	chr14:67294371-67360265	-0.37554	0.000417458	0.0188435
214927_at	ITGBL1	chr13:101452593-101720856	-0.421934	0.000919565	0.0269875
214981_at	POSTN	chr13:37562583-37598844	0.316037	1.89818e-05	0.00584844
214983_at	TTTY15	chrY:12537650-12860839	0.868064	0.00138871	0.0325719
215015_at	BICDL1	chr12:119989236-120094494	-0.351338	0.00238446	0.0426956
215019_x_at	ZNF528	chr19:52397849-52418412	-0.465945	0.00120194	0.030426
215023_s_at	PEX1	chr7:92487020-92528520	-0.432034	0.000774855	0.024993
215030_at	GRSF1	chr4:70815783-70839897	0.359626	0.00215341	0.0405878
215053_at	SRCAP	chr16:30698209-30741409	-0.370161	0.000297208	0.0167116
215065_at	PHF8	chrX:53936676-54048958	-0.419597	0.0011252	0.0297764
215091_s_at	GTF3A	chr13:27424619-27435823	0.480386	3.86388e-05	0.00748132
215101_s_at	CXCL5	chr4:73995642-73998677	0.26437	0.00313286	0.0489785
215120_s_at	SAMD4A	chr14:54566117-54793315	0.507889	4.3048e-05	0.00758745
215157_x_at	PABPC1	chr8:100685816-100722809	0.855921	1.88917e-05	0.00584844
215161_at	CAMK1G	chr1:209583714-209613939	-0.571718	0.00237211	0.0425806
215178_x_at	NAAA	chr4:76841061-76861284	-0.452619	0.0013905	0.0325719
215199_at	CALD1	chr7:134744252-134970729	-0.32366	0.00188957	0.0378315
215228_at	NHLH2	chr1:115836377-115843917	0.482333	0.000874303	0.0263359
215270_at	LFNG	chr7:2512529-2529177	0.49517	0.000617781	0.0226406
215303_at	DCLK1	chr13:35768652-36131382	-1.14779	8.36323e-05	0.00959436
215320_at	SPATA31C2	chr9:88129305-88138475	0.277998	0.00223942	0.041281
215334_at	EFR3B	chr2:25042076-25159135	-0.390216	0.000280616	0.0164686
215394_at	PIK3C3	chr18:41955234-42087830	-0.436634	0.00269317	0.0456642
215427_s_at	ZCCHC14	chr16:87406246-87493024	0.561003	7.1775e-05	0.00907205
215489_x_at	HOMER3	chr19:18929201-18941261	0.434002	0.000989167	0.0278874
215511_at	TCF20	chr22:42557055-42608067	-0.60898	0.000204227	0.0142354
215527_at	KHDRBS2	chr6:61630233-61681049	-0.563698	0.00276514	0.0461524
215537_x_at	DDAH2	chr6:31714445-31718024	0.609667	0.000306825	0.016888
215543_s_at	LARGE1	chr22:33162226-33922841	-0.368877	0.00298615	0.0477998
215550_at	SRGAP3	chr3:8980591-9363053	-0.490683	0.000123423	0.0112168
215590_x_at	ACVR2B-AS1	chr3:38451027-38454820	-0.3451	0.000660511	0.0232391
215618_at	RSU1	chr10:16733310-16736356	0.306091	0.00195833	0.0384129
215641_at	SEC24D	chr4:118722823-118838683	0.311	0.00215441	0.0405878
215685_s_at	DLX2	chr2:172099438-172102900	-0.522228	0.00180906	0.0369479
215716_s_at	ATP2B1	chr12:89588049-89709366	-0.787923	1.6453e-05	0.00558345
215738_at	LINC00563	chr13:46296445-46297844	-0.469339	2.03426e-05	0.00607283
215787_at	ACTA2	chr10:90706032-90707729	-0.3317	0.00083385	0.0257131
215842_s_at	ATP11A	chr13:112690038-112887168	0.463417	3.76955e-05	0.00747511
215844_at	TNPO2	chr19:12699201-12724011	0.464245	0.00246238	0.0434977
215873_x_at	ABCC10	chr6:43427366-43450427	-0.377076	6.13419e-05	0.00850936
215933_s_at	HHEX	chr10:92689955-92695647	0.502985	0.00160413	0.0349466
215966_x_at	GK3P	chrX:101778969-101780538	0.446903	0.000315409	0.0170818
216058_s_at	CYP2C19	chr10:94762681-94855547	-0.361793	0.000489275	0.0204109
216063_at	HBBP1	chr11:5242120-5243537	-0.347407	0.000379261	0.0181859
216076_at	L3MBTL1	chr20:43489442-43550954	0.413941	0.00113134	0.029811
216096_s_at	NRXN1	chr2:49918503-51225575	-0.911092	0.00127351	0.0312474
216127_at	PDIA2	chr16:334151-337208	0.5343	6.84389e-06	0.00382418
216137_s_at	MAPK8IP3	chr16:1815960-1818825	0.35102	0.000318343	0.0172077
216153_x_at	RECK	chr9:36087179-36110137	-0.584885	0.00279292	0.0463046
216182_at	SYNJ2	chr6:158447947-158450438	0.322818	0.00160783	0.0349608
216192_at	FABP7	chr6:122779716-122784074	-0.39122	0.000111979	0.0108292
216196_at	HERC2P8	chr16:33098808-33109465	-0.376182	0.000130008	0.0114447
216203_at	SPTLC2	chr14:77505997-77616637	-0.38643	2.01206e-05	0.00606925
216326_s_at	HDAC3	chr5:141620876-141636849	-0.284207	0.00213215	0.0403081
216328_at	SIGLEC8	chr19:51450847-51458456	0.274384	0.00102786	0.0283911
216341_s_at	GNRHR	chr4:67737118-67754388	-0.38482	0.00194674	0.0383261
216355_at	PCDHB17P	chr5:140535579-140537990	-0.418028	0.00249485	0.0438314
216439_at	TNK2	chr3:195863364-195911945	0.357642	0.00020184	0.0142354
216483_s_at	MYDGF	chr19:4641374-4670362	0.373644	0.000184318	0.0137553
216506_x_at	MLLT10	chr10:21524646-21743630	-0.402657	0.00106549	0.0289238
216507_at	TAPT1	chr4:16191961-16228072	-0.498953	0.000123113	0.0112168
216533_at	PCCA	chr13:101166959-101171290	0.29176	0.000186292	0.0138308
216661_x_at	CYP2C9	chr10:94938658-94990091	-0.332399	0.00277227	0.0461794
216663_s_at	ZMYND10	chr3:50341110-50345732	-0.286877	0.00269943	0.0457008
216676_x_at	KIR3DL3	chr19:54726054-54736537	-0.496873	0.00232596	0.0421232
216701_at	C1orf68	chr1:152692385-152692801	0.423658	0.000297656	0.0167116
216705_s_at	ADA	chr20:44584896-44652252	0.463759	0.000201998	0.0142354
216788_at	ZNF443	chr19:12537720-12539934	0.280092	0.000741718	0.0244416
216794_at	LOC100289518	chr11:85994953-85996077	-0.444056	0.00157405	0.0346589
216832_at	RUNX1T1	chr8:91954972-92103286	-0.395386	0.00167575	0.0355901
216871_at	ZDHHC17	chr12:77158023-77216312	-0.375596	0.0016904	0.0357883
216894_x_at	CDKN1C	chr11:2883205-2885904	0.779172	0.000520841	0.0211597
216901_s_at	IKZF1	chr7:50304068-50405101	0.369997	0.000810766	0.0254078
216905_s_at	ST14	chr11:130159782-130210362	0.404895	0.00077281	0.0249515
216915_s_at	PTPN12	chr7:77537295-77640069	0.895925	0.000115796	0.0109536
216928_at	TAL1	chr1:47684359-47689748	0.376826	6.99583e-05	0.00900791
216930_at	HNF1A	chr12:120978543-121002512	-0.371849	0.000436395	0.0191953
216940_x_at	YBX1	chr1:43148236-43148462	0.597214	0.000232521	0.0151508
216944_s_at	ITPR1	chr3:4493345-4847506	-0.690995	0.00166881	0.0355435
216955_at	TAF1	chrX:70587348-70644088	-0.427338	2.61544e-05	0.00669109
216961_s_at	RPAIN	chr17:5336100-5342381	0.342224	0.000151933	0.0122877
216965_x_at	SPART	chr13:36301638-36370180	-0.416927	0.00107388	0.0289894
216969_s_at	KIF22	chr16:29790727-29805385	0.417763	0.00130256	0.0317076
216980_s_at	SPN	chr16:29674299-29676837	0.38102	0.00123645	0.0308282
216988_s_at	PTP4A2	chr1:31906421-31944856	0.541291	0.000441825	0.0193091
217037_at	SLC1A2	chr11:35413086-35441512	0.380585	1.51708e-05	0.00529072
217062_at	DMPK	chr19:46273213-46274623	0.391875	0.00121272	0.0305196
217071_s_at	MTHFR	chr1:11785723-11806455	0.393328	0.00161258	0.0350245
217087_at	C1orf68	chr1:152719522-152720470	-0.363871	0.000381858	0.0181859
217099_s_at	GEMIN4	chr17:744421-753999	-0.411604	0.00192465	0.0380128
217124_at	IQCE	chr7:2558972-2614733	0.398131	0.000628168	0.0228466
217170_at	TRAV8-6	chr14:21978459-21979120	-0.47287	0.00220378	0.040977
217230_at	EZR	chr6:159191821-159204658	-0.444734	5.77384e-05	0.00835754
217237_at	ADAM3B	chr16:49551686-49552263	0.376673	0.000293986	0.0167076
217254_s_at	EPO	chr7:100720468-100723700	0.422746	0.00104677	0.0287132
217274_x_at	MYL4	chr17:45286473-45301036	-0.314187	0.00325225	0.0499792
217296_at	KIR2DS4	chr19:118595-120713	-0.295767	0.000264964	0.0159626
217335_at	LINC01949	chr5:86534631-86535962	-0.393748	0.00134156	0.03206
217374_x_at	TRGV5	chr7:38345030-38345499	-0.405599	0.0019106	0.0379068
217418_x_at	MS4A1	chr11:60455846-60470752	-0.514912	2.66327e-05	0.00669109
217430_x_at	COL1A1	chr17:50184101-50201632	-0.556646	0.000333396	0.0174315
217475_s_at	LIMK2	chr22:31212239-31280080	0.498561	0.00111578	0.029618
217485_x_at	PMS2P1	chr7:100328836-100335860	-0.471469	0.0011607	0.0299981
217496_s_at	IDE	chr10:92451684-92574096	-0.399544	0.000968187	0.0275634
217510_at	CRX	chr19:47819779-47843330	0.336369	0.000689551	0.0235861
217513_at	MILR1	chr17:64449037-64468643	0.318083	0.00238729	0.0427268
217528_at	CLCA2	chr1:86424171-86456553	0.286857	0.000249225	0.0155802
217541_x_at	ZNF816	chr19:52949379-52962911	-0.390125	0.00031541	0.0170818
217545_at	MYH14	chr19:50188186-50310542	0.499857	0.000726937	0.024256
217637_at	KCNB1	chr20:49293394-49484297	-0.700036	0.00076109	0.0247837
217663_at	ZNF234	chr19:44141554-44160313	0.276065	0.000670371	0.0232957
217711_at	TEK	chr9:27109141-27230174	-0.608827	0.0026654	0.0455789
217800_s_at	NDFIP1	chr5:142108779-142154440	-0.383052	0.00251282	0.0440075
217808_s_at	MAPKAP1	chr9:125437393-125707234	0.459448	6.04018e-05	0.00850936
217812_at	YTHDF2	chr14:39215065-39216335	-0.382226	0.00130732	0.031782
217819_at	GOLGA7	chr8:41488200-41511095	0.461451	0.000612083	0.0225864
217834_s_at	SYNCRIP	chr6:85607779-85644063	0.770724	0.00134859	0.0321211
217865_at	RNF130	chr5:179911651-180072113	0.693516	0.00122719	0.0307063
217880_at	CDC27	chr17:47117703-47189422	-0.323369	9.16896e-05	0.0101658
217887_s_at	EPS15	chr1:51354263-51519328	-0.371176	0.00166277	0.035461
217893_s_at	AKIRIN1	chr1:38991276-39006059	0.387985	0.00102716	0.0283911
217901_at	DSG2	chr18:31498177-31549008	-0.380077	0.000674541	0.0232957
217964_at	TTC19	chr17:15999784-16045015	-0.562801	0.0029698	0.0476572
217985_s_at	BAZ1A	chr14:34752731-34875647	0.6914	0.000798261	0.0253689
217986_s_at	BAZ1A	chr14:34752731-34875647	0.727491	0.000488754	0.0204109
217993_s_at	MAT2B	chr5:163503114-163519558	-0.400116	0.00026894	0.0160231
218004_at	BSDC1	chr1:32364633-32394731	0.30619	0.00183271	0.0371497
218006_s_at	ZNF22	chr10:45000923-45005326	0.527138	0.000261878	0.0159355
218007_s_at	RPS27L	chr15:63125872-63158021	0.676728	0.000374222	0.0181859
218063_s_at	CDC42EP4	chr17:73283624-73312005	0.48584	0.0025374	0.0442226
218074_at	CIAO2B	chr16:66932065-66934423	0.282325	0.00226466	0.0415685
218165_at	MEAF6	chr1:37489993-37514766	-0.307802	0.00111348	0.029575
218167_at	AMZ2	chr17:68205481-68257712	-0.272187	0.00306647	0.0484159
218181_s_at	MAP4K4	chr2:101696850-101894690	0.811414	0.00021363	0.0144249
218183_at	CDIP1	chr16:4512634-4526261	0.407521	0.00288108	0.0469912
218188_s_at	TIMM13	chr19:2425625-2427586	0.518579	0.000110346	0.0108292
218215_s_at	NR1H2	chr19:50329653-50383388	0.514886	9.39351e-06	0.00440423
218273_s_at	PDP1	chr8:93857807-93926068	-0.938999	0.000433371	0.0191336
218289_s_at	UBA5	chr3:132654446-132679794	-0.400702	0.00250417	0.0439631
218292_s_at	PRKAG2	chr7:151556124-151877125	-0.455094	0.00180124	0.0368782
218293_x_at	NUP50	chr22:45163925-45188017	0.479597	1.19741e-05	0.00496638
218329_at	PRDM4	chr12:107732871-107761272	-0.315644	0.000385141	0.0182161
218333_at	DERL2	chr17:5471254-5486811	0.467066	8.82993e-05	0.00994462
218355_at	KIF4A	chrX:70290104-70420886	-0.342824	0.00149612	0.0337735
218392_x_at	SFXN1	chr5:175477062-175529742	0.457094	1.10304e-05	0.00490513
218399_s_at	CDCA4	chr14:105009573-105021083	-0.30532	0.000431072	0.0191336
218438_s_at	MED28	chr4:17614641-17634105	0.371644	0.00210688	0.0399783
218463_s_at	MUS81	chr11:65857126-65867653	0.345307	9.25678e-05	0.0101658
218508_at	DCP1A	chr3:53283429-53347586	-0.325434	0.000847149	0.0259485
218524_at	E4F1	chr16:2223580-2235742	0.498368	0.000126974	0.011308
218533_s_at	UCKL1	chr20:63939829-63956416	0.506837	0.000150539	0.0122409
218539_at	FBXO34	chr14:55271344-55370053	-0.44729	0.000205933	0.0142354
218564_at	RFWD3	chr16:74621399-74666877	-0.399205	0.00116555	0.0300513
218583_s_at	DCUN1D1	chr3:182938074-182985953	-0.326215	0.000683995	0.0234719
218590_at	TWNK	chr10:100987367-100994403	0.391138	0.000888431	0.0265575
218617_at	TRIT1	chr1:39838110-39883511	-0.374404	0.0014999	0.0338025
218638_s_at	SPON2	chr4:1166932-1208962	-0.639407	0.00240048	0.0428401
218644_at	PLEK2	chr14:67386984-67412167	-0.543116	0.000724828	0.0242368
218661_at	NAA60	chr16:3443649-3486953	0.354294	0.000573939	0.0218817
218681_s_at	SDF2L1	chr22:21642302-21644299	0.459664	0.000739756	0.0244142
218729_at	LXN	chr3:158645822-158672648	0.673079	0.000715545	0.0240008
218752_at	ZMAT5	chr22:29730956-29767011	0.383626	0.000856774	0.026118
218767_at	REXO4	chr9:133406207-133418244	0.349973	0.00114846	0.0299055
218778_x_at	EPS8L1	chr19:55072020-55087923	0.369274	0.00300125	0.0478591
218785_s_at	IFT22	chr7:101310914-101321823	-0.374943	0.00274692	0.0460686
218787_x_at	CWF19L1	chr10:100232298-100267680	-0.403708	0.000986295	0.0278465
218824_at	PNMA8A	chr19:46466491-46471563	-0.434918	0.00127977	0.0313832
218840_s_at	NADSYN1	chr11:71453109-71524107	0.64749	0.000164731	0.0128959
218865_at	MTARC1	chr1:220786352-220819659	-0.563989	0.00053797	0.0215082
218867_s_at	SPRING1	chr12:116710171-116738070	-0.484152	0.00203079	0.0392138
218882_s_at	WDR3	chr1:117929720-117966543	0.426653	6.48405e-06	0.00377959
218892_at	DCHS1	chr11:6621330-6655809	0.312523	0.00280127	0.0463066
218894_s_at	MAGOHB	chr12:10604193-10613609	0.359464	0.00193265	0.038101
218921_at	SIGIRR	chr11:405716-417455	0.601228	0.00142142	0.0328698
218937_at	ZSCAN32	chr16:3382081-3401065	-0.340159	0.00324546	0.0499261
218938_at	FBXL15	chr10:102419189-102423136	0.410728	0.00159505	0.0348898
218959_at	HOXC10	chr12:53985065-53990279	-0.314288	0.00307138	0.0484579
218966_at	MYO5C	chr15:52192322-52295804	-0.545576	0.000731032	0.0242792
218968_s_at	ZFP64	chr20:52051663-52204308	-0.371199	0.00265283	0.0454673
218996_at	TFPT	chr19:54107066-54115801	0.473243	0.000253273	0.0156698
219002_at	FASTKD1	chr2:169528508-169573875	0.504422	0.00289336	0.0470741
219011_at	PLEKHA4	chr19:48837092-48868617	0.530936	6.73952e-05	0.00877335
219028_at	HIPK2	chr7:139561570-139777998	0.733162	0.00285461	0.0467832
219046_s_at	PKNOX2	chr11:125164687-125433389	-0.479964	0.00033784	0.0175988
219054_at	NPR3	chr5:32689070-32791724	-0.361802	0.000380587	0.0181859
219057_at	RABEP2	chr16:28904421-28936526	0.354667	0.00290096	0.0470741
219075_at	YIPF2	chr19:10922185-10928681	0.498411	0.000753897	0.0247275
219150_s_at	ADAP1	chr7:898778-975549	0.417341	0.0010814	0.029073
219186_at	ZBTB7A	chr19:4043303-4066899	0.513983	0.000845676	0.0259485
219229_at	SLCO3A1	chr15:91853708-92172435	0.814216	6.67135e-06	0.00382418
219236_at	PAQR6	chr1:156243320-156248117	0.776316	0.00132384	0.0319186
219250_s_at	FLRT3	chr20:14322985-14337614	-0.889327	0.00061065	0.0225864
219280_at	BRWD1	chr21:39184176-39321559	0.477376	0.000808251	0.0253737
219295_s_at	PCOLCE2	chr3:142815922-142889206	0.397253	0.000973336	0.0276398
219304_s_at	PDGFD	chr11:103907189-104164379	-0.804901	0.00241088	0.0429499
219324_at	NOL12	chr22:37681673-37693476	0.425141	0.00219455	0.0408731
219332_at	MICALL2	chr7:1428465-1459470	0.449454	0.00302332	0.0480158
219339_s_at	EHMT1	chr9:137618992-137870016	0.404901	0.00021192	0.0144249
219341_at	CLN8	chr8:1755340-1786132	0.596205	0.000126228	0.011308
219368_at	NAP1L2	chrX:73212299-73214851	-0.678474	7.83947e-05	0.00943758
219375_at	CEPT1	chr1:111139479-111185104	0.725448	4.23977e-05	0.00758745
219386_s_at	SLAMF8	chr1:159826811-159837492	0.56057	0.00249565	0.0438314
219424_at	EBI3	chr19:4229523-4237528	0.428774	0.000253551	0.0156698
219437_s_at	ANKRD11	chr16:89267630-89490561	0.843187	0.000365619	0.0181796
219444_at	BCORL1	chrX:129981107-130058071	-0.397447	0.000791988	0.0253242
219457_s_at	RIN3	chr14:92513781-92688994	0.576615	3.87002e-05	0.00748132
219488_at	A4GALT	chr22:42692121-42721298	0.45393	0.000452164	0.0195422
219496_at	SOWAHC	chr2:109614364-109618990	0.645591	0.000727051	0.024256
219498_s_at	BCL11A	chr2:60450520-60554467	-0.75794	3.10517e-05	0.00686097
219534_x_at	CDKN1C	chr11:2883205-2885904	1.04429	7.22994e-05	0.00909223
219544_at	BORA	chr13:72727749-72756198	-0.386308	0.000149336	0.0122081
219561_at	COPZ2	chr17:48026167-48038030	-0.45235	0.000837555	0.0258057
219563_at	SYNE3	chr14:95407266-95516650	0.704983	0.00126069	0.0311275
219568_x_at	SOX18	chr20:64047582-64049639	0.426611	0.000408779	0.0187382
219569_s_at	SLC35G2	chr3:136818647-136855888	-0.502775	0.000192737	0.0140169
219586_at	WDR59	chr16:74871362-75000173	0.410522	0.00235451	0.0424058
219593_at	SLC15A3	chr11:60937060-60952653	0.457866	8.72903e-05	0.00985672
219619_at	DIRAS2	chr9:90609832-90642862	-0.619579	0.00316882	0.0492961
219634_at	CHST11	chr12:104455295-104762014	0.642599	3.07196e-05	0.00686097
219726_at	NLGN3	chrX:71144821-71175255	0.419262	0.000402245	0.0186037
219728_at	MYOT	chr5:137867858-137887851	0.69414	0.00282093	0.0464253
219812_at	PVRIG	chr7:100177563-100221488	-0.457877	6.11315e-05	0.00850936
219816_s_at	RBM23	chr14:22893204-22919182	-0.437118	0.000330797	0.0173561
219822_at	MTRF1	chr13:41216369-41263577	0.404882	0.000754192	0.0247275
219828_at	RABL6	chr9:136807943-136841187	-0.517571	6.01039e-05	0.00850936
219831_at	CDKL3	chr5:134286350-134371047	-0.327124	0.00165322	0.0354201
219837_s_at	CYTL1	chr4:5014586-5019458	0.663514	0.000157456	0.0125312
219845_at	BARX1	chr9:93951627-93955355	0.33311	0.00266108	0.045568
219866_at	CLIC5	chr6:45880827-46080348	-0.413043	0.000638165	0.0230161
219881_s_at	CTC-338M12.4	chr5:181246466-181272167	-0.265996	0.00258188	0.0447762
219890_at	CLEC5A	chr7:141927357-141947007	0.594321	7.0698e-05	0.00903991
219895_at	TMEM255A	chrX:120258650-120311556	0.75489	0.0016547	0.0354201
219930_at	KLF8	chrX:56232356-56291531	-0.353008	8.17378e-06	0.00416217
219932_at	SLC27A6	chr5:128538013-129033642	0.335946	0.0017177	0.0362136
219937_at	TRHDE	chr12:72087266-72670758	-0.687635	0.000819759	0.0254941
219960_s_at	UCHL5	chr1:193012250-193060080	-0.639828	0.000384033	0.0182161
220008_at	PEAK1	chr15:77100656-77420144	-0.678977	0.000557982	0.0217333
220017_x_at	CYP2C9	chr10:94938658-94990091	-0.546747	0.000365046	0.0181796
220023_at	APOBR	chr16:28494643-28498964	0.331144	0.000612571	0.0225864
220025_at	TBR1	chr2:161416297-161425870	-0.838183	0.000673397	0.0232957
220027_s_at	RASIP1	chr19:48720585-48740610	0.353118	0.00180097	0.0368782
220040_x_at	ZC4H2	chrX:64915802-65034713	-0.354433	0.00115282	0.0299318
220069_at	TUBA8	chr22:18110100-18146683	0.335758	0.00224467	0.0413423
220072_at	CSPP1	chr8:67062417-67196778	0.529368	0.000543192	0.0215751
220076_at	ANKH	chr5:14704800-14871778	-0.588708	0.000225911	0.0149017
220092_s_at	ANTXR1	chr2:69013176-69249327	0.287732	0.000117995	0.0109897
220118_at	ZBTB32	chr19:35704558-35717038	0.481391	5.71895e-05	0.00830595
220153_at	ENTPD7	chr10:99659509-99711241	-0.384328	0.000239533	0.0152908
220161_s_at	EPB41L4B	chr9:109171974-109321059	-0.361987	0.000287671	0.0166299
220162_s_at	CARD9	chr9:136363956-136373681	0.490192	0.000112093	0.0108292
220204_s_at	BMP8A	chr1:39491636-39529869	0.390177	0.00167364	0.0355775
220247_at	KNL1	chr15:40594020-40664342	0.335881	4.67612e-06	0.00288149
220259_at	PLEKHH3	chr17:42667914-42676994	0.339156	0.00224842	0.0413584
220262_s_at	DLK2	chr6:43450352-43456632	-0.344649	0.00138971	0.0325719
220282_at	RIC3	chr11:8106056-8169055	-0.487906	0.00123698	0.0308282
220283_at	HHIPL2	chr1:222522258-222548104	-0.305739	0.00321802	0.04973
220284_at	DKKL1	chr19:49361783-49375116	0.40325	0.000970952	0.0275903
220289_s_at	CRYBG2	chr1:26321698-26360080	0.477014	3.01445e-06	0.00249338
220295_x_at	DEPDC1	chr1:68474152-68497221	-0.401106	0.000925324	0.0270911
220320_at	DOK3	chr5:177501904-177511274	0.457677	0.000150687	0.0122409
220322_at	IL36G	chr2:112973203-112985658	-0.264849	0.00275747	0.04612
220332_at	CLDN16	chr3:190322541-190412138	-0.416115	0.00253718	0.0442226
220333_at	PAQR5	chr15:69298912-69407780	0.299904	0.00102991	0.0283911
220379_at	FSCN3	chr7:127591409-127602144	-0.457745	0.00242394	0.0430983
220398_at	GNPTAB	chr12:101745499-101830959	-0.3365	0.000151813	0.0122877
220408_x_at	SUPT20H	chr13:37009312-37059713	0.383212	0.000956171	0.0274677
220414_at	CALML5	chr10:5498697-5499570	0.686496	8.61563e-09	0.000187531
220416_at	ATP8B4	chr15:49858238-50182817	0.34449	0.00275696	0.04612
220418_at	UBASH3A	chr21:42403447-42447684	0.404889	0.000322672	0.0172756
220422_at	UBQLN3	chr11:5507300-5509958	-0.331315	0.000255441	0.0157407
220428_at	CD207	chr2:70830211-70835816	-0.483883	8.19461e-05	0.009502
220430_at	FAM110D	chr1:26159079-26163962	0.373622	0.00173595	0.0363531
220463_at	TRPM3	chr9:73406666-73483964	-0.495548	0.00012999	0.0114447
220542_s_at	BPIFA1	chr20:33235995-33243311	-0.568583	0.00078253	0.0250664
220563_s_at	SHANK1	chr19:50659255-50719802	0.506434	0.000806616	0.0253737
220581_at	CCDC170	chr6:151494017-151621193	-0.281359	0.000967993	0.0275634
220624_s_at	ELF5	chr11:34478791-34525193	-0.377221	0.000159965	0.0126293
220627_at	CST8	chr20:23491101-23496010	-0.281764	0.00288364	0.0469912
220635_at	PSORS1C2	chr6:31130046-31131862	-0.577984	7.73505e-05	0.00943758
220647_s_at	COA4	chr11:73872667-73876901	0.490332	1.92818e-06	0.00202858
220652_at	KIF24	chr9:34252380-34329268	0.270424	0.00143365	0.0329891
220665_at	LUZP4	chrX:115289715-115307563	-0.500589	0.00044692	0.0194138
220678_at	FLJ20712	chr7:33725981-33728456	0.317772	0.00118043	0.030281
220685_at	FAM120C	chrX:54068324-54183281	0.389027	0.000247019	0.0155517
220709_at	ZNF556	chr19:2867335-2883445	0.309837	0.000696246	0.0237412
220714_at	PRDM14	chr8:70051651-70071693	-0.456287	0.00229856	0.0418924
220722_s_at	SLC5A7	chr2:107986523-108013994	-0.343284	0.00301217	0.0479446
220725_x_at	DNAH3	chr16:20933111-21159459	-0.523345	0.00267802	0.0455789
220738_s_at	RPS6KA6	chrX:84058346-84206356	-0.339599	0.00234888	0.0423751
220746_s_at	UIMC1	chr5:176905005-177022633	0.324879	0.00175602	0.0365747
220812_s_at	HHLA2	chr3:108296529-108378285	0.54786	1.15696e-07	0.000554505
220813_at	CYSLTR2	chr13:48653711-48711226	-0.456764	0.000145562	0.0121204
220825_s_at	KIRREL1	chr1:157993273-158100262	-0.338625	0.0012213	0.0306626
220853_at	GTDC1	chr2:144992638-144995074	-0.444526	0.00168637	0.0357452
220869_at	UBA6	chr4:68545275-68547962	-0.370366	2.42349e-05	0.006493
220874_at	EPB41	chr1:29394642-29395626	-0.46388	0.000647218	0.0230535
220887_at	CCDC177	chr14:69569799-69574871	-0.449653	0.000781988	0.0250664
220928_s_at	PRDM16	chr1:3069168-3438621	0.340303	0.00241296	0.0429499
220948_s_at	ATP1A1	chr1:116372668-116410261	-0.42894	0.0020813	0.0397581
220951_s_at	A1CF	chr10:50799409-50885675	-0.506174	0.00165539	0.0354201
220999_s_at	CYFIP2	chr5:157266079-157395595	-0.275921	0.00312823	0.0489431
221010_s_at	SIRT5	chr6:13574227-13615158	-0.431769	0.000304065	0.0168371
221012_s_at	TRIM8	chr10:102644479-102658318	0.510811	0.000630628	0.0228854
221040_at	CAPN10	chr2:240586734-240617705	0.263436	0.000268829	0.0160231
221042_s_at	CLMN	chr14:95181940-95319908	0.558896	0.000304072	0.0168371
221047_s_at	MARK1	chr1:220528136-220664461	-0.778462	0.000235629	0.0152456
221058_s_at	CKLF	chr16:66552563-66566251	0.435955	0.000125036	0.0112759
221068_at	KANK2	chr19:11164270-11197791	0.831702	9.92305e-07	0.0015853
221112_at	IL1RAPL2	chrX:104566199-105767829	-0.644856	0.000118293	0.0109897
221114_at	AMBN	chr4:70592256-70607288	-0.493607	0.00246554	0.043533
221173_at	USH1C	chr11:17536363-17537941	-0.445201	0.00169371	0.0358154
221197_s_at	CHAT	chr10:49609095-49667942	-0.372672	4.56811e-05	0.00758745
221215_s_at	RIPK4	chr21:41739369-41767089	-0.444582	0.000416066	0.0188435
221265_s_at	INTS14	chr15:65578753-65611289	-0.403263	0.000838869	0.0258277
221278_at	HOXB8	chr17:48611377-48615292	0.414316	0.000126528	0.011308
221281_at	SRC	chr20:36012550-36031782	0.42503	0.000169546	0.0131772
221293_s_at	DEF6	chr6:35297818-35321771	0.326758	0.00299539	0.0478591
221300_at	NPAP1	chr15:24675775-24683393	-0.472026	0.00135471	0.0321569
221304_at	UGT1A8	chr2:234526353-234527285	-0.335837	0.00010371	0.0106259
221313_at	GPR52	chr1:174447964-174449545	-0.506582	0.000417315	0.0188435
221319_at	PCDHB8	chr5:141177790-141180539	0.344296	0.00068132	0.0234342
221388_at	OR1A1	chr17:3207539-3218896	-0.39689	0.00206388	0.0396021
221392_at	TAS2R4	chr7:141776674-141781691	-0.463843	0.000143685	0.0120113
221393_at	TAAR3P	chr6:132608252-132609276	-0.486738	0.000346271	0.0177341
221398_at	TAS2R8	chr12:10806051-10807293	-0.497648	5.04511e-08	0.000435242
221409_at	OR2S2	chr9:35957108-35958154	-0.348182	0.001329	0.0319368
221443_x_at	PRLH	chr2:237566574-237567175	0.521719	0.000319237	0.0172154
221444_at	TAS2R16	chr7:122994704-122995700	-0.42453	0.000735622	0.024315
221447_s_at	GLT8D2	chr12:103988987-104064183	-0.490502	0.000566624	0.0218057
221453_at	G6PC2	chr2:168918229-168926984	-0.404354	6.34132e-05	0.00861333
221465_at	OR6A2	chr11:6815955-6816939	-0.509076	8.10712e-05	0.00947698
221478_at	BNIP3L	chr8:26383054-26505636	-0.353205	0.000493439	0.02051
221518_s_at	USP47	chr11:11841423-11961887	0.493725	0.000149718	0.0122081
221519_at	FBXW4	chr10:101610664-101695295	0.402569	0.000765014	0.0248486
221520_s_at	CDCA8	chr1:37692481-37709719	-0.433593	0.000169943	0.0131795
221545_x_at	MED16	chr19:868013-881626	0.400658	0.000288869	0.0166299
221551_x_at	ST6GALNAC4	chr9:127907886-127917041	0.40945	0.000194268	0.0140169
221580_s_at	TAF1D	chr11:93729948-93784391	0.43519	0.000510475	0.0209499
221602_s_at	FCMR	chr1:206903317-206923247	-0.472906	0.00257638	0.0447212
221685_s_at	SPDL1	chr5:169583636-169604778	-0.300236	0.0018716	0.0376721
221699_s_at	DDX50	chr10:68901286-68946847	-0.315172	0.00178451	0.0367935
221704_s_at	VPS37B	chr12:122865330-122896127	0.442515	0.00282555	0.0464523
221707_s_at	VPS53	chr17:470782-683831	-0.481558	0.000236333	0.0152456
221728_x_at	XIST	chrX:73821657-73821724	-4.59525	6.05347e-07	0.00118689
221755_at	EHBP1L1	chr11:65576046-65592650	0.501507	0.000751372	0.0247219
221758_at	ARMC6	chr19:19033575-19060311	0.397439	0.00081906	0.0254907
221784_at	WIZ	chr19:15419978-15449956	0.297522	0.000669159	0.0232948
221801_x_at	NEFL	chr8:24950955-24956721	-0.630128	0.00085404	0.0260715
221802_s_at	SHTN1	chr10:116881477-117126586	0.55668	0.00154985	0.0343539
221809_at	RANBP10	chr16:67723070-67806560	-0.276047	0.00250622	0.0439763
221812_at	FBXO42	chr1:16246840-16352480	-0.445003	0.00125044	0.0310101
221813_at	FBXO42	chr1:16246840-16352480	-0.336563	0.000873907	0.0263359
221828_s_at	MVB12B	chr9:126326829-126507041	0.519182	0.000666461	0.023261
221831_at	LUZP1	chr1:23084030-23177808	-0.426101	0.000607431	0.0225864
221862_at	MIER2	chr19:301443-336173	-0.333727	0.000244587	0.0154923
221868_at	PAIP2B	chr2:71182738-71227103	0.819939	0.00153863	0.0342096
221885_at	DENND2A	chr7:140518420-140673993	0.548101	0.000825801	0.0256082
221886_at	DENND2A	chr7:140216369-140302243	0.90571	4.41159e-06	0.00279844
221916_at	NEFL	chr8:24950955-24956721	-0.490562	0.000577826	0.0219406
221968_s_at	ZNF771	chr16:30429523-30429915	0.651687	1.63306e-06	0.00198339
221975_s_at	CFAP410	chr21:45751771-45759086	0.271417	0.000951068	0.0274227
221996_s_at	CLTB	chr5:175819776-175843295	0.309606	0.00130474	0.0317427
222003_s_at	DOCK6	chr19:11199295-11262524	0.344107	0.00248225	0.0437046
222024_s_at	AKAP13	chr15:85380571-85749358	0.593715	0.000764981	0.0248486
222025_s_at	OPLAH	chr8:144051266-144063965	0.505885	0.000272972	0.016179
222030_at	SIVA1	chr14:104753147-104768494	-0.371891	0.000992306	0.0279179
222053_at	TAF6L	chr11:62553794-62554305	-0.356179	0.0027256	0.0459356
222092_at	PTPN21	chr14:88983555-89021077	0.453949	0.000306851	0.016888
222093_s_at	INO80B	chr2:74455087-74457944	-0.507008	0.00129806	0.0316516
222119_s_at	FBXO11	chr2:47789316-47906498	-0.315243	0.00094897	0.0274172
222120_at	ZNF764	chr16:30553764-30558374	-0.358406	0.000558999	0.0217333
222183_x_at	MBD3	chr19:1573596-1592865	-0.618111	0.000903762	0.0267378
222189_at	AMBRA1	chr11:46417963-46615571	-0.306273	0.00125215	0.0310101
222222_s_at	HOMER3	chr19:18907013-18934397	0.489722	0.000616404	0.0226384
222258_s_at	SH3BP4	chr2:234952017-235055714	0.685847	0.00275263	0.04612
222289_at	KCNC2	chr12:75444972-75601470	0.438879	0.000296932	0.0167116
222293_at	CADM4	chr19:44128983-44129336	0.530949	0.0017784	0.0367208
222346_at	LAMA1	chr18:6958925-6959394	0.36185	0.000295277	0.0167116
222379_at	KCNE4	chr2:223052190-223198399	0.420815	0.00231525	0.0420675
222423_at	NDFIP1	chr5:142108779-142154440	-0.307504	0.00138811	0.0325719
222440_s_at	THRAP3	chr1:36224432-36305357	-0.473114	8.23516e-05	0.00952342
222443_s_at	RBM8A	chr14:60397757-60398281	0.346683	0.00221929	0.0411207
222515_x_at	TMEM165	chr4:55395957-55453397	0.647484	2.04341e-05	0.00607283
222531_s_at	AP5M1	chr14:57268924-57298742	-0.412597	0.00267862	0.0455789
222537_s_at	CDC42SE1	chr1:151050971-151070325	0.466546	0.000351774	0.0178665
222553_x_at	OXR1	chr8:106270144-106752694	-0.579824	0.00130162	0.0317027
222554_s_at	NOL6	chr9:33461353-33473930	-0.452654	0.000471365	0.0200122
222567_s_at	MEX3C	chr18:51174550-51218333	-0.398814	0.000421351	0.0189323
222572_at	PDP1	chr8:93857807-93926068	-0.626797	0.00164158	0.0353341
222625_s_at	NDE1	chr16:15728421-15811507	0.414806	0.000136567	0.0117306
222661_at	AGGF1	chr5:77029251-77065234	-0.359662	0.00068975	0.0235861
222720_x_at	ODR4	chr1:186375838-186421378	0.356881	0.00277784	0.0461993
222749_at	SUFU	chr10:102503972-102633535	0.477709	2.34243e-05	0.006493
222754_at	TRNT1	chr3:3126933-3153435	0.757588	1.1943e-05	0.00496638
222760_at	ZNF703	chr8:37695782-37700019	0.468464	0.00102329	0.0283341
222788_s_at	RSBN1	chr1:113761832-113812476	0.558573	0.000541144	0.0215334
222789_at	RSBN1	chr1:113761832-113812476	-0.832928	0.00030683	0.016888
222813_at	ZNF668	chr16:31060843-31074240	0.327123	0.000205747	0.0142354
222818_at	OSBPL10	chr3:31702317-32023362	0.38102	0.000352484	0.0178665
222824_at	NUDT5	chr10:12165330-12196144	0.704878	0.000123841	0.0112168
222827_s_at	KLHL41	chr2:169509702-169526258	-0.486085	0.000147101	0.0121264
222831_at	SAP30L	chr5:153825516-153835707	0.83296	0.000236143	0.0152456
222852_at	C10orf88	chr10:122930901-122954311	-0.380157	0.00188186	0.0377554
222853_at	FLRT3	chr20:14322985-14337614	-0.615384	0.00112205	0.0297113
222856_at	APLN	chrX:129645259-129654956	0.365221	0.000916477	0.0269845
222872_x_at	NABP1	chr2:191678068-191741097	0.502642	0.000751319	0.0247219
222877_at	NRP2	chr2:205681990-205798133	0.565528	0.00288619	0.0469973
222884_at	ZNF346	chr5:177022696-177081189	-0.284827	0.00268405	0.0456341
222886_at	NSUN3	chr3:94062980-94131832	0.268664	0.00215961	0.0405878
222895_s_at	BCL11B	chr14:99169287-99272197	0.624042	0.00289747	0.0470741
222905_s_at	TMEM143	chr19:48332356-48364059	-0.338533	0.00305216	0.0483063
223035_s_at	FARSB	chr2:222566899-222656092	-0.44703	0.00152879	0.0340446
223039_at	GUCD1	chr22:24540423-24555935	0.397539	0.000407074	0.0186799
223095_at	MARVELD1	chr10:97713173-97718150	-0.458935	7.25727e-05	0.00909591
223125_s_at	C1orf21	chr1:184387029-184629019	0.390186	0.000504691	0.0207998
223142_s_at	UCK1	chr9:131523801-131531264	0.361388	0.00063975	0.0230303
223147_s_at	WDR33	chr2:127701027-127811187	0.413503	0.00323974	0.0499094
223186_at	PEDS1	chr20:50118254-50153734	0.554547	7.62742e-06	0.0040123
223226_x_at	SSBP4	chr19:18418864-18434562	0.38584	0.000993585	0.0279179
223232_s_at	CGN	chr1:151510510-151538692	0.391132	0.000123692	0.0112168
223235_s_at	SMOC2	chr6:168441151-168673445	0.737162	0.000551405	0.0217333
223267_at	TRMT10C	chr3:101561868-101566446	-0.278065	0.00241184	0.0429499
223285_s_at	ST6GALNAC4	chr9:127907886-127917041	0.345562	0.00168561	0.0357452
223302_s_at	ZNF655	chr7:99558406-99576453	-0.364608	0.000888409	0.0265575
223303_at	FERMT3	chr11:64205926-64223896	0.458449	0.00177244	0.0367158
223317_at	ALKBH7	chr19:6372643-6375040	0.447515	0.000668268	0.0232841
223356_s_at	MTIF3	chr13:27435643-27450591	0.293259	0.00299957	0.0478591
223364_s_at	DHX37	chr12:124946825-124989131	0.522139	0.000543905	0.0215836
223372_at	NUDT22	chr11:64225941-64230686	0.511288	0.000852809	0.026059
223373_s_at	PLA2G12A	chr4:109709989-109730070	-0.473166	0.00207452	0.0396707
223393_s_at	TSHZ3	chr19:31149979-31349436	-0.590052	2.65818e-05	0.00669109
223413_s_at	LYAR	chr4:4267701-4290154	0.768132	4.75553e-07	0.00110165
223441_at	SLC17A5	chr6:73593379-73653992	-0.421172	0.00119705	0.0304183
223451_s_at	CKLF	chr16:66552563-66566251	0.487249	0.00061496	0.0226334
223469_at	PGPEP1	chr19:18340598-18369950	0.505306	0.000133212	0.0115723
223589_at	ZNF416	chr19:57571566-57578911	-0.331353	0.00139323	0.0325845
223603_at	RNF112	chr17:19411125-19417276	-0.348434	0.00190522	0.0379068
223604_at	GARNL3	chr9:127224265-127393660	-0.315427	0.00126393	0.031164
223610_at	SEMA5B	chr3:122909082-123028605	-0.51198	0.000794311	0.0253557
223628_at	TMEM191A	chr22:21466423-21471269	0.474933	0.00195262	0.0383893
223659_at	TMPRSS13	chr11:117900641-117929459	-0.397106	6.20019e-05	0.00850936
223666_at	SNX5	chr20:17941597-17968980	0.32469	0.00152322	0.0339732
223688_s_at	LY6K	chr8:142700111-142705127	0.273315	0.00173107	0.0363531
223728_at	CENPBD1P	chr16:89969791-89972534	-0.453628	0.000523989	0.0212229
223774_at	SNHG12	chr1:28580920-28581054	0.493347	0.00321154	0.0497236
223786_at	CHST6	chr16:75472052-75495445	0.694136	0.000192047	0.0140169
223792_at	ZNF2	chr2:95165432-95184317	-0.496682	0.000170186	0.0131795
223801_s_at	APOL4	chr22:36189124-36204840	0.385133	0.000344425	0.0177341
223810_at	KLHL1	chr13:69700594-70108493	0.454399	0.000413978	0.0188435
223832_s_at	CAPNS2	chr16:55566684-55567687	-0.314215	0.00281115	0.0463345
223837_at	GULP1	chr2:188291669-188595931	-0.302464	0.002345	0.0423314
223852_s_at	STK40	chr1:36339624-36385924	0.523109	4.94012e-05	0.00786294
223856_at	AKR1E2	chr10:4786629-4848062	-0.459179	0.00155277	0.0343676
223893_at	ENAM	chr4:70628744-70646824	-0.427494	0.00218997	0.0408731
223934_at	SP140L	chr2:230327184-230403732	0.297989	0.00250696	0.0439763
223943_s_at	GNG2	chr14:52434420-52436513	0.287276	0.000870547	0.0263359
223994_s_at	SLC12A9	chr7:100826820-100867010	0.381833	8.48708e-05	0.00968493
223997_at	FNIP1	chr5:131641714-131797017	-0.337969	0.0023712	0.0425806
224016_at	HIPK2	chr7:139296707-139299340	-0.607645	9.4905e-05	0.01026
224039_at	FAM186B	chr12:49582885-49605639	-0.676784	8.93816e-05	0.00998828
224051_at	PFKFB2	chr1:207221125-207222613	-0.379736	0.000653982	0.0231415
224057_s_at	THAP4	chr2:241584405-241637158	0.308362	0.00119331	0.0304038
224088_at	NMUR2	chr5:152391546-152433368	-0.595245	0.00173928	0.0363739
224110_at	PRO1804	chr17:69232963-69235012	0.37157	0.000432324	0.0191336
224111_x_at	KLF16	chr19:1852399-1863579	0.391064	0.00132237	0.0319186
224118_at	UBE2B	chr5:133707258-133707797	0.529453	9.02284e-08	0.000552563
224159_x_at	TRIM4	chr7:99876958-99919531	-0.821109	0.000460953	0.019804
224180_x_at	WDPCP	chr2:63119559-63827843	-0.46092	4.09959e-05	0.00758745
224245_at	INGX	chrX:71491682-71492928	0.464697	9.14023e-06	0.00440423
224320_s_at	MCM8	chr20:5950652-5998977	0.48957	0.00108457	0.0290813
224337_s_at	FZD4	chr11:86945679-86955395	0.38768	4.34209e-05	0.00758745
224404_s_at	FCRL5	chr1:157513377-157552515	-0.303574	0.00274131	0.0460282
224409_s_at	TSSK6	chr19:19512418-19515548	0.62822	2.83029e-05	0.00682036
224425_x_at	ACTR3BP2	chrY:11395699-11397076	-0.459268	0.000135231	0.0116898
224449_at	DDI2	chr1:15617458-15669044	-0.326891	0.00288216	0.0469912
224478_s_at	C7orf50	chr7:996986-1138260	0.453206	0.000324086	0.017288
224496_s_at	TMEM107	chr17:8172457-8176399	0.754758	0.000542851	0.0215751
224520_s_at	BEST3	chr12:69643360-69699476	0.367019	0.000490744	0.0204327
224588_at	XIST	chrX:73820649-73852723	-5.68959	4.85254e-07	0.00110165
224589_at	XIST	chrX:73820649-73852723	-3.11532	3.87649e-08	0.000418031
224590_at	XIST	chrX:73821657-73821724	-4.60032	8.69507e-09	0.000187531
224616_at	DYNC1LI2	chr16:66720893-66751609	0.415624	5.61352e-05	0.00823603
224622_at	TBC1D14	chr4:6909242-7033118	0.4951	1.50012e-05	0.00529072
224630_at	ERLEC1	chr2:53787009-53833038	-0.543677	0.00247074	0.0436069
224637_at	OST4	chr2:27070472-27071654	0.497118	0.00233522	0.0422348
224650_at	MAL2	chr8:119165034-119245673	-0.797435	0.00122427	0.0306671
224681_at	GNA12	chr7:2728105-2844308	0.548232	0.000548946	0.0217237
224703_at	DCAF5	chr14:69050881-69153150	0.435125	0.00284911	0.0467643
224708_at	KIAA2013	chr1:11919591-11926428	-0.354361	0.000301883	0.0168371
224733_at	CMTM3	chr16:66603874-66613892	0.621714	7.06326e-05	0.00903991
224770_s_at	NAV1	chr1:201539127-201826969	0.476683	0.00312082	0.0488992
224780_at	RBM17	chr10:6089034-6117457	0.395122	0.0027932	0.0463046
224785_at	UBALD2	chr17:76265348-76271298	0.443221	7.12337e-05	0.00903991
224801_at	NDFIP2	chr13:79481155-79556077	-0.563641	0.000183631	0.013742
224807_at	GRAMD1A	chr19:34994784-35026471	0.41419	0.000782762	0.0250664
224830_at	NUDT21	chr16:56429133-56452199	-0.30235	0.00220806	0.0410215
224847_at	CDK6	chr7:92604921-92836573	0.592306	0.00057172	0.0218817
224912_at	TTC7A	chr2:46915869-47076137	0.310518	0.000572912	0.0218817
224924_at	TTC7A	chr2:46915869-47076137	0.644552	3.66004e-06	0.00254638
224936_at	EIF2S3	chrX:24054946-24078810	-0.300612	0.000637297	0.0230075
225015_s_at	STK40	chr1:36339624-36385924	0.287604	0.00211587	0.0400826
225042_s_at	CSRNP2	chr12:51061205-51083664	-0.426796	0.000265542	0.0159751
225050_at	ZNF512	chr2:27582969-27623217	-0.339394	0.000193896	0.0140169
225076_s_at	ZNFX1	chr20:49237946-49278426	-0.323802	0.00292993	0.0473342
225094_at	KMT5A	chr2:91747940-91748986	0.341989	0.000700792	0.023756
225097_at	HIPK2	chr7:139561570-139777998	0.853261	0.000912068	0.026873
225104_at	ZNF598	chr16:1997654-2009821	0.390028	0.000292642	0.0166879
225129_at	CPNE2	chr16:57092583-57148369	0.844852	4.43527e-05	0.00758745
225151_at	RTKN	chr2:74425835-74442422	0.46052	0.00149029	0.0337443
225283_at	ARRDC4	chr15:97960703-97973833	0.646328	0.00295954	0.0476342
225299_at	MYO5B	chr18:49822789-50195164	-0.485474	0.00190877	0.0379068
225305_at	SLC25A29	chr14:100279959-100291456	0.369537	0.000753192	0.0247275
225306_s_at	SLC25A29	chr14:100291116-100306547	0.424364	0.000258373	0.0158067
225313_at	FAM217B	chr20:59933764-59948680	-0.407314	0.00120782	0.0304599
225327_at	FAM214A	chr15:52581317-52709817	-0.586735	0.000236831	0.0152456
225360_at	TRABD	chr22:50185913-50199598	0.368549	0.000152404	0.0122877
225387_at	TSPAN5	chr4:98470367-98658611	-0.382626	0.0026321	0.0452693
225388_at	TSPAN5	chr4:98470367-98658611	-0.685222	0.000252823	0.0156698
225396_at	RBBP4	chr1:32651142-32686211	-0.390891	0.0003464	0.0177341
225419_at	MPLKIP	chr7:40126027-40134622	0.388504	0.00111932	0.0296571
225425_s_at	MRPL41	chr9:137551879-137552555	0.515757	0.000188105	0.0139381
225518_x_at	MTHFD1L	chr6:151186684-151423023	0.319323	0.000712449	0.0239528
225532_at	CABLES1	chr18:23134564-23260470	-0.57556	0.00164314	0.0353355
225533_at	PHF19	chr9:120855651-120894896	0.349635	0.00199994	0.038908
225537_at	TRAPPC6B	chr14:39147811-39170532	-0.56041	0.001628	0.0351992
225566_at	NRP2	chr2:205681990-205798133	0.457802	0.00020518	0.0142354
225591_at	FBXO25	chr8:406428-477967	-0.374184	0.000781253	0.0250664
225605_at	TP53I13	chr17:29566052-29573157	0.514081	2.79217e-05	0.00676631
225618_at	ARHGAP27	chr17:45393920-45434353	0.441748	3.81743e-05	0.00747511
225641_at	MEF2D	chr1:156463727-156500779	-0.458153	7.85502e-05	0.00943758
225655_at	UHRF1	chr12:20551590-20553012	0.652148	3.08156e-05	0.00686097
225667_s_at	LRATD1	chr2:14632700-14650814	-0.727238	0.00127257	0.0312421
225685_at	CDC42EP3	chr2:37641882-37738468	-0.6121	0.000203591	0.0142354
225701_at	AKNA	chr9:114334156-114394405	0.372462	0.00114087	0.0298843
225710_at	GNB4	chr3:179396088-179451476	0.754553	0.000468768	0.0199821
225721_at	SYNPO2	chr4:118850688-119061247	-0.506322	0.00303416	0.0481171
225747_at	COQ10A	chr12:56266890-56270966	-0.356155	0.000538995	0.0215082
225757_s_at	CLMN	chr14:95181940-95319908	0.422894	0.000237542	0.0152456
225802_at	TOP1MT	chr8:143304384-143359979	0.403715	0.00181242	0.0369938
225826_at	MMAB	chr12:109553715-109573580	0.481324	4.8579e-05	0.00784815
225838_at	EPC2	chr2:148644440-148787569	-0.361319	0.00308754	0.0486417
225844_at	POLE4	chr2:74958643-74970128	0.355018	0.00135414	0.0321569
225852_at	ANKRD17	chr4:73073376-73258798	0.479096	0.000110878	0.0108292
225877_at	TYSND1	chr10:70137981-70146700	0.300771	0.000709174	0.0239138
225879_at	TSEN54	chr17:75515944-75524735	-0.325673	0.000892736	0.0266308
225881_at	SLC35B4	chr7:134289332-134316930	-0.402346	0.000530919	0.021423
225987_at	STEAP4	chr7:88270892-88306894	-0.734823	0.00202464	0.0391761
226001_at	KLHL5	chr4:39045039-39126857	0.639806	0.000671733	0.0232957
226018_at	MTURN	chr7:30134986-30162762	0.556712	0.000401734	0.0186037
226030_at	ACADSB	chr10:123008979-123058290	-0.502026	0.000196483	0.0140552
226036_x_at	CASP2	chr7:143288215-143307696	-0.434421	0.000616672	0.0226384
226040_at	TRIM56	chr7:101085481-101097967	0.723088	0.000367512	0.0181796
226049_at	ERC1	chr12:990509-1495933	0.276732	0.00205838	0.0395846
226063_at	VAV2	chr9:133761894-133992604	0.489601	3.71856e-05	0.00746279
226066_at	MITF	chr3:69739456-69968336	0.549503	0.000718533	0.0240449
226068_at	SYK	chr9:90801787-90898549	0.577025	0.00289654	0.0470741
226086_at	SYT13	chr11:45240302-45286341	-0.513004	0.000313591	0.0170792
226104_at	RNF170	chr8:42849637-42897290	-0.286887	0.000288141	0.0166299
226116_at	DFFA	chr1:10456522-10472529	0.507047	0.000111454	0.0108292
226121_at	DHRS13	chr17:28897781-28903079	0.389328	0.0015946	0.0348898
226147_s_at	PIGR	chr1:206928522-206946466	-0.451425	5.0056e-05	0.00786294
226172_at	USP42	chr7:6179756-6368824	-0.286825	0.00311796	0.0488889
226183_at	GSK3B	chr3:119821321-120094994	-0.369332	0.00167662	0.035591
226185_at	CDS1	chr4:84583127-84651334	-0.408701	0.00321603	0.04973
226187_at	CDS1	chr4:84583127-84651334	-0.446636	0.0003891	0.0183048
226195_at	IFT43	chr14:75902136-76084585	0.329379	0.00139068	0.0325719
226202_at	ZNF398	chr7:149126416-149183042	-0.423399	0.00223128	0.0412095
226224_at	FOXK2	chr17:82519713-82644662	-0.347817	0.000341421	0.0176797
226241_s_at	MRPL52	chr14:22829879-22835037	0.418361	0.00293794	0.0474459
226248_s_at	ELAPOR1	chr1:109113679-109206781	-0.37541	0.00279914	0.0463066
226308_at	HAUS8	chr19:17049729-17075625	0.441883	5.81155e-05	0.00837167
226319_s_at	ALYREF	chr17:81887835-81891586	1.25571	1.29199e-05	0.00506635
226320_at	ALYREF	chr17:81887835-81891586	0.692221	0.000136791	0.0117306
226359_at	GTPBP1	chr22:38705742-38738299	0.370516	0.0019623	0.0384129
226391_at	BRAF	chr7:140719327-140924929	-0.448556	0.00017732	0.013447
226393_at	CYP2U1	chr4:107931549-107953461	-0.39785	0.0020877	0.0398289
226408_at	TEAD2	chr19:49340595-49362457	0.291676	0.000329803	0.0173488
226417_at	RHOB	chr2:20647432-20648154	0.376131	0.00297112	0.0476606
226437_at	YIF1B	chr19:38303558-38317273	0.591671	0.000772734	0.0249515
226463_at	ATP6V1C1	chr8:103021063-103073051	-0.48441	0.00053824	0.0215082
226507_at	PAK1	chr11:77322017-77474635	-0.546637	0.00120893	0.0304599
226512_at	ZMYM2	chr13:19958677-20091829	-0.528225	4.02465e-05	0.00758093
226559_at	IER5L	chr9:129175552-129178261	0.594201	0.000391454	0.0183537
226633_at	RAB8B	chr15:63189560-63267776	0.466777	0.00139478	0.0325845
226676_at	ZNF521	chr18:25061924-25352190	0.527271	0.00139168	0.0325719
226722_at	FAM20C	chr7:192571-260772	0.554548	0.000220377	0.0147379
226746_s_at	UBE4B	chr1:10240074-10240720	-0.426415	0.000510475	0.0209499
226772_s_at	SAP30L	chr5:153826104-153835748	-0.279208	0.00300118	0.0478591
226803_at	CHMP4C	chr8:81732448-81759515	-0.327046	4.91973e-05	0.00786294
226824_at	CPXM2	chr10:123706207-123940267	-0.421813	0.00173038	0.0363531
226855_at	PDP2	chr16:66878589-66895754	-0.439775	7.83991e-05	0.00943758
226881_at	GRPEL2	chr5:149345430-149354583	-0.523182	0.00122001	0.0306494
226899_at	UNC5B	chr10:71212570-71302864	0.583424	0.000163638	0.0128337
226902_at	USP13	chr3:179653032-179804366	-0.375196	0.00222503	0.041185
226913_s_at	SOX8	chr16:981770-986979	0.782174	0.00274003	0.0460246
226922_at	RANBP2	chr2:108719482-108785810	-0.418747	0.000640272	0.0230303
226948_at	RHBDD1	chr2:226835581-226999215	0.356824	0.00275515	0.04612
226974_at	NEDD4L	chr18:58044226-58401540	-0.593392	0.000636699	0.0230075
227004_at	CDKL5	chrX:18425583-18653629	-0.635049	0.00133735	0.0319954
227007_at	TMCO4	chr1:19682240-19799945	-0.273214	0.00298139	0.047772
227049_at	ZADH2	chr18:75195113-75209139	-0.381825	0.00136474	0.0323273
227057_at	ARHGAP27	chr17:45393920-45434353	0.506974	0.00039571	0.0185003
227058_at	MEDAG	chr13:30906271-30925572	-0.629443	0.0008446	0.0259485
227064_at	ANKRD40	chr17:50693198-50707914	0.632696	0.000339908	0.0176437
227080_at	ZNF697	chr1:119619377-119648266	-0.674304	0.000612637	0.0225864
227117_at	XPOT	chr12:64404392-64451125	0.331853	0.00320922	0.0497054
227171_at	CCT4	chr2:61878940-61881353	-0.36801	0.00191989	0.0379966
227190_at	TMEM37	chr2:119429901-119438504	-0.523561	0.000398863	0.018575
227209_at	CNTN1	chr12:40692439-41072415	-0.525693	0.00198813	0.0387869
227240_at	NGEF	chr2:232878701-233013256	-0.738077	0.000235934	0.0152456
227258_at	CACUL1	chr10:118674167-118755249	0.582457	0.000478614	0.0201415
227266_s_at	FYB1	chr5:39105252-39274528	1.00902	0.00267543	0.0455789
227275_at	MEX3C	chr18:48703120-48723051	-0.523527	0.00145008	0.0331826
227332_at	PXN-AS1	chr12:120201274-120213233	0.427858	0.00120773	0.0304599
227333_at	DCUN1D3	chr16:20854925-20900358	-0.472788	0.00176207	0.0365946
227352_at	SWSAP1	chr19:11374666-11376951	0.285681	0.00144427	0.03312
227382_at	CYB5B	chr16:69463844-69466264	-0.761272	0.00118552	0.030281
227425_at	REPS2	chrX:16946658-17153272	-0.522648	0.00139655	0.0325845
227449_at	EPHA4	chr2:221418027-221574202	-0.770438	6.34992e-05	0.00861333
227474_at	PAX8-AS1	chr2:113211421-113276581	0.494152	0.00116364	0.0300432
227478_at	SETBP1	chr18:44680173-45068510	-0.604542	0.00156771	0.0345722
227521_at	FBXO33	chr14:39397684-39432466	-0.496057	0.000816565	0.0254511
227541_at	WDR20	chr14:102139503-102224847	0.556006	0.000801585	0.0253737
227557_at	SCARF2	chr22:20424584-20437826	0.475565	9.2764e-05	0.0101658
227596_at	FLJ37453	chr1:16160572-16161394	0.304468	0.000268448	0.0160231
227628_at	GPX8	chr5:55160167-55167297	-0.402735	0.00236489	0.0425217
227636_at	THAP5	chr7:108554543-108569750	-0.574075	0.000405537	0.0186491
227664_at	FLJ37453	chr1:15834474-15848147	0.611023	1.65532e-06	0.00198339
227666_at	DCLK2	chr4:150078445-150257438	0.446453	9.74339e-05	0.010403
[truncated: 755 more rows]
