# Supplementary material for: Genome-wide transcriptome profiling and development of age prediction models in the human brain
Source: Aging (Albany NY). 2024 Feb 28;16(5):4075–94. doi: 10.18632/aging.205609 (PMC10968712; doi:10.18632/aging.205609)
Supplement: Supplementary Table 8 [file aging-16-205609-s009.xlsx]

## Sheet: Sheet1
Supplementary Table 8. Results from machine learning prediction model development, related to Figure 3.
Lasso
Probeset	Gene Symbol	Coefficient estimates
(Intercept)	---	969.573
1553102_a_at	CCDC69	8.32214
1553865_a_at	GPR26	-3.24146
200077_s_at	OAZ1	-15.6366
201253_s_at	CDIPT	-15.8353
204062_s_at	ULK2	-4.95219
205626_s_at	CALB1	-0.68671
207671_s_at	BEST1	5.88714
209869_at	ADRA2A	-3.62901
216592_at	MAGEC3	11.9629
217786_at	PRMT5	-2.91003
217860_at	NDUFA10	-7.14434
218214_at	ATG101	-2.82126
218888_s_at	NETO2	-2.59824
220331_at	CYP46A1	-3.37212
222976_s_at	TPM3	-16.1032
223550_s_at	CA10	-1.66165
224575_at	BRK1	-6.1325
224896_s_at	TTL	-5.64619
226114_at	ZNF436	-5.37006
226374_at	CXADR	-3.98176
228135_at	C1orf52	-4.75257
230765_at	NWD2	-3.08025
EN
Probeset	Gene Symbol	Coefficient estimates
(Intercept)	---	899.417
1552722_at	ARPP21	-0.0300084
1553102_a_at	CCDC69	0.679631
1553864_at	GPR26	-0.13412
1553865_a_at	GPR26	-0.330138
1554016_a_at	USB1	0.972658
1554501_at	TSC22D4	0.409751
1554887_at	EMSLR	1.87042
1555199_at	GOSR1	1.16835
1555591_at	PIF1	-0.987072
1561432_at	SMIM14-DT	-2.29601
1563920_at	DENND10	1.40862
1568618_a_at	GALNT1	-0.732677
1569728_at	LINC00423	-1.09187
200052_s_at	ILF2	-0.480403
200077_s_at	OAZ1	-2.63223
200078_s_at	ATP6V0B	-0.191986
200757_s_at	CALU	-1.32969
200776_s_at	BZW1	-0.259563
200941_at	HSBP1	-1.11263
200942_s_at	HSBP1	-1.20058
201056_at	GOLGB1	0.337256
201237_at	CAPZA2	-0.225932
201238_s_at	CAPZA2	-0.26161
201253_s_at	CDIPT	-2.51203
201310_s_at	NREP	-0.335752
201353_s_at	BAZ2A	0.743546
201373_at	PLEC	0.301241
201400_at	PSMB3	-1.12698
201573_s_at	ETF1	-0.35962
201574_at	ETF1	-1.08735
201671_x_at	USP14	-0.670208
201722_s_at	GALNT1	-1.21172
201751_at	JOSD1	-1.34267
201863_at	FAM32A	-1.02634
201877_s_at	PPP2R5C	-0.77342
202112_at	VWF	0.188282
202128_at	AREL1	-0.562985
202144_s_at	ADSL	-0.761038
202200_s_at	SRPK1	-0.706716
202501_at	MAPRE2	-0.38219
202732_at	PKIG	-0.999462
202769_at	CCNG2	-0.677518
202893_at	UNC13B	-1.5009
203038_at	PTPRK	0.537677
203182_s_at	SRPK2	-0.876497
203376_at	CDC40	-0.359228
203414_at	MMD	-0.563391
203484_at	SEC61G	-0.556563
203487_s_at	ARMC8	-0.794697
203599_s_at	WBP4	1.16644
203648_at	TATDN2	-0.700099
203917_at	CXADR	-0.256035
204062_s_at	ULK2	-0.635996
204288_s_at	SORBS2	-0.755521
204301_at	KBTBD11	0.789621
204331_s_at	MRPS12	-0.14373
204703_at	IFT88	0.441291
204874_x_at	BAIAP3	0.736002
204995_at	CDK5R1	-0.762525
204996_s_at	CDK5R1	-0.196213
205625_s_at	CALB1	-0.0910182
205626_s_at	CALB1	-0.101964
206290_s_at	RGS7	-0.362502
207243_s_at	CALM2	-3.64957
207308_at	SLCO1A2	0.280271
207362_at	SLC30A4	-1.07093
207671_s_at	BEST1	0.502122
208598_s_at	HUWE1	1.02311
208675_s_at	DDOST	-0.535272
208731_at	RAB2A	-0.60165
208781_x_at	SNX3	-0.380991
208799_at	PSMB5	-1.08042
208870_x_at	ATP5F1C	-0.602679
208873_s_at	REEP5	-0.923127
209054_s_at	NSD2	1.28402
209364_at	BAD	-0.955552
209393_s_at	EIF4E2	-0.296532
209439_s_at	PHKA2	1.23164
209806_at	H2BC12	-0.417789
209869_at	ADRA2A	-0.530728
210355_at	PTHLH	-0.445895
210542_s_at	SLCO3A1	0.86195
210648_x_at	SNX3	-0.605637
210675_s_at	PTPRR	-0.160232
210721_s_at	PAK5	-0.342577
210819_x_at	DIO2	-0.982547
211296_x_at	UBC	-1.87599
211625_s_at	DRD3	-1.01608
211725_s_at	BID	-0.381828
211963_s_at	ARPC5	-0.650206
211986_at	AHNAK	0.197233
212085_at	SLC25A6	-1.05148
212114_at	ATXN7L3B	-1.97455
212365_at	MYO1B	-0.339555
212449_s_at	LYPLA1	-0.431247
212502_at	ADO	-0.572208
212661_x_at	PPIA	-2.0604
212691_at	NUP188	0.991084
212946_at	VWA8	0.383202
213305_s_at	PPP2R5C	-0.26161
213325_at	NECTIN3	-0.18646
213327_s_at	USP12	-0.655689
213366_x_at	ATP5F1C	-0.899654
213447_at	IPW	0.58347
213496_at	PLPPR4	-0.373411
213518_at	PRKCI	-0.805154
213564_x_at	LDHB	-2.84663
213675_at	PARVA	0.275966
213793_s_at	HOMER1	-0.305393
214393_at	RND2	0.420231
214455_at	H2BC4	0.828734
215119_at	MYO16	-1.11141
216356_x_at	BAIAP3	0.622201
216389_s_at	DCAF11	-0.511805
216592_at	MAGEC3	2.22051
216834_at	RGS1	0.123021
217309_s_at	VPS26C	-0.395376
217733_s_at	TMSB10	-1.99221
217781_s_at	ZNF106	0.333763
217786_at	PRMT5	-0.399046
217854_s_at	POLR2E	-0.654542
217860_at	NDUFA10	-0.926159
217883_at	MMADHC	-0.549411
217945_at	BTBD1	-0.647711
217955_at	BCL2L13	0.807522
218178_s_at	CHMP1B	-0.466204
218214_at	ATG101	-0.409037
218546_at	C1orf115	-0.927023
218592_s_at	HDHD5	-1.82901
218694_at	ARMCX1	-0.814467
218888_s_at	NETO2	-0.242876
219160_s_at	PAPOLG	-1.28228
219204_s_at	SRR	-0.645514
219293_s_at	OLA1	-1.22563
219372_at	IFT81	0.872676
219402_s_at	DERL1	-0.289085
219521_at	B3GAT1	-1.17323
219639_x_at	PARP6	-1.49244
219758_at	TTC26	-1.05855
220331_at	CYP46A1	-0.567004
220359_s_at	ARPP21	-0.305968
220703_at	IDI2-AS1	0.577554
221127_s_at	DKK3	0.419771
221135_s_at	ASTE1	0.599943
221325_at	KCNK13	-1.45277
221423_s_at	YIPF5	-0.123061
221471_at	SERINC3	-0.247246
221483_s_at	ARPP19	-1.19256
221614_s_at	RPH3AL	1.29349
221687_s_at	MVB12B	0.849117
221764_at	R3HDM4	-1.25891
221772_s_at	PPP2R2D	-0.673328
221918_at	CDK17	-1.02793
222035_s_at	PAPOLA	-0.371241
222231_s_at	LRRC59	-0.571172
222774_s_at	NETO2	-0.0872706
222870_s_at	B3GNT2	-0.258083
222976_s_at	TPM3	-1.86339
223022_s_at	VTA1	-0.397006
223059_s_at	FAM107B	0.136297
223122_s_at	SFRP2	0.163964
223151_at	DCUN1D5	-0.358895
223226_x_at	SSBP4	-1.2019
223382_s_at	ZNRF1	-0.731988
223524_s_at	TMEM108	-1.30339
223550_s_at	CA10	-0.212434
223675_s_at	VEZT	-0.455153
224407_s_at	STK26	-0.750354
224575_at	BRK1	-1.05236
224598_at	MGAT4B	-0.49084
224738_x_at	RPL7L1	-1.76686
224782_at	ZMAT2	-0.235
224794_s_at	CERCAM	0.158479
224840_at	FKBP5	0.0595819
224856_at	FKBP5	0.0927433
224896_s_at	TTL	-0.519671
224908_s_at	TTL	-0.159857
225048_at	PHF10	0.336964
225071_at	NUS1	-0.370513
225222_at	MFSD14A	-0.463318
225235_at	TSPAN17	-0.755456
225329_at	MCRIP1	-0.999639
225355_at	NEURL1B	-0.642249
225439_at	NUDCD1	-0.471892
225665_at	MAP3K20	0.272517
225666_at	TMTC4	0.330657
225728_at	SORBS2	-0.942222
225749_at	C16orf91	-0.398868
226113_at	ZNF436	-0.988726
226114_at	ZNF436	-0.579737
226250_at	ZBTB20	0.187986
226267_at	JDP2	0.430046
226374_at	CXADR	-0.634975
226400_at	CDC42	-0.366106
226651_at	HOMER1	-0.283647
226899_at	UNC5B	0.41474
227014_at	ASPHD2	-0.435239
227108_at	STARD9	0.589333
227138_at	CRTAP	0.407371
227176_at	SLC2A13	-0.440854
227298_at	TRAM2-AS1	0.967781
227347_x_at	HES4	-0.644346
227363_s_at	EMC8	-1.30928
227382_at	CYB5B	-0.112964
227388_at	TUSC1	-1.30144
227420_at	TNFAIP8L1	-0.695121
227871_at	CHM	-0.483991
227880_s_at	TMEM185A	-0.428697
228135_at	C1orf52	-0.762819
228151_at	ARL15	-1.15788
228436_at	KCNC4	0.638606
228461_at	SH3RF3	-0.963221
229029_at	CAMK4	-0.155344
229228_at	CREB5	0.173009
229256_at	PGM2L1	-0.394005
229303_at	SF3B1	1.01834
229347_at	MIR4458HG	-0.702833
229538_s_at	IQGAP3	0.922341
229664_at	MAPK8	-0.791644
229849_at	WIPF3	0.300523
230150_at	BCAP29	1.03827
230197_s_at	TPPP	0.832642
230359_at	KNDC1	0.654493
230418_s_at	GALNT16	0.403296
230695_s_at	RSPH9	-0.690526
230765_at	NWD2	-0.366459
231688_at	MMP8	0.846224
231872_at	LRRCC1	1.03803
231935_at	ARPP21	-0.213647
231980_at	DOK6	-0.261419
232027_at	SYNE1	-0.417629
232166_at	CEP126	-0.219879
232252_at	STYXL2	-0.918045
233150_at	GALNTL5	-0.327571
233354_at	ZNF426	0.91682
233467_s_at	TSPAN32	1.00168
234842_at	TRAV8-1	1.16645
234950_s_at	COP1	-1.04733
235461_at	TET2	0.784997
236211_at	RAB40B	-0.572984
236290_at	DOK6	-0.363199
236361_at	GALNT15	0.225278
236377_at	TMEM132D	-0.155398
236902_at	LINC00643	-0.298509
236915_at	C4orf47	0.816919
238679_at	MESD	-1.24875
238815_at	LRRTM1	-0.327381
239461_at	GALNT15	0.401822
241362_at	SOGA1	1.0298
241395_at	NIT1	0.960237
34726_at	CACNB3	-0.329989
823_at	CX3CL1	-0.472301
XGBoost
Probeset	Gene Symbol	Mean SHAP score
213325_at	NECTIN3	4.43908
222774_s_at	NETO2	2.77429
236377_at	TMEM132D	2.60124
217781_s_at	ZNF106	1.75064
223550_s_at	CA10	1.60349
1553865_a_at	GPR26	1.21845
226114_at	ZNF436	1.12961
200630_x_at	SET	1.03863
226113_at	ZNF436	0.793609
220342_x_at	EDEM3	0.698348
1553864_at	GPR26	0.624104
202250_s_at	DCAF8	0.617131
213447_at	IPW	0.555265
227014_at	ASPHD2	0.553655
231875_at	KIF21A	0.481151
204849_at	TCFL5	0.412684
204062_s_at	ULK2	0.386341
229269_x_at	SSBP4	0.377264
213518_at	PRKCI	0.376395
238815_at	LRRTM1	0.30432
212075_s_at	CSNK2A1	0.281022
224224_s_at	PDE11A	0.277818
216592_at	MAGEC3	0.277713
208858_s_at	ESYT1	0.270303
242352_at	NIPBL	0.255449
213904_at	FRRS1L	0.25397
219204_s_at	SRR	0.249613
227420_at	TNFAIP8L1	0.23841
211447_s_at	PDE4A	0.236841
204811_s_at	CACNA2D2	0.235707
201341_at	ENC1	0.23221
230831_at	FRMD5	0.226789
223573_s_at	PPP2R2C	0.211685
218888_s_at	NETO2	0.209133
227870_at	IGDCC4	0.206859
1553348_a_at	NFX1	0.202787
201207_at	TNFAIP1	0.201007
228791_at	ARPIN	0.190568
214323_s_at	UPF3A	0.18866
202144_s_at	ADSL	0.186084
204301_at	KBTBD11	0.181768
208598_s_at	HUWE1	0.180094
202854_at	HPRT1	0.17875
203917_at	CXADR	0.172708
221483_s_at	ARPP19	0.168641
228151_at	ARL15	0.166271
211696_x_at	HBB	0.166188
230765_at	NWD2	0.160117
202693_s_at	STK17A	0.159467
212449_s_at	LYPLA1	0.154012
240228_at	CSMD3	0.153799
200685_at	SRSF11	0.152218
217827_s_at	SPG21	0.135311
227001_at	NIPAL2	0.130708
218105_s_at	MRPL4	0.129595
223852_s_at	STK40	0.127593
216623_x_at	TOX3	0.125716
201609_x_at	ICMT	0.125265
208994_s_at	PPIG	0.124049
210996_s_at	YWHAE	0.119195
213640_s_at	LOX	0.117216
1561573_at	LINC02620	0.116225
1569009_s_at	LOC100132249	0.115327
242631_x_at	DLC1	0.10704
224321_at	TMEFF2	0.102583
243779_at	GALNT13	0.0954542
209364_at	BAD	0.0936443
212947_at	SLC9A8	0.0920751
227871_at	CHM	0.0919178
218764_at	PRKCH	0.0832018
233354_at	ZNF426	0.0791924
226412_at	PNISR	0.0768884
1554586_a_at	RHOBTB2	0.0758957
1559072_a_at	ELFN2	0.0752683
225291_at	PNPT1	0.075128
232081_at	ABCG1	0.074205
213476_x_at	TUBB3	0.0728135
1559546_s_at	SNRPN	0.0721355
230359_at	KNDC1	0.07008
215548_s_at	SCFD1	0.070029
212026_s_at	EXOC7	0.0677157
226397_s_at	PHACTR1	0.0667752
1554334_a_at	DNAJA4	0.066669
203630_s_at	COG5	0.0656332
238964_at	FIGN	0.0622115
241672_at	SERTM1	0.0618978
226400_at	CDC42	0.0616971
222458_s_at	AKIRIN1	0.0611196
224284_x_at	FKSG49	0.0594942
212230_at	PLPP3	0.0593701
214920_at	THSD7A	0.059248
1570253_a_at	RHEBL1	0.0588163
241781_at	CARNMT1	0.0570099
238692_at	BTBD11	0.0558133
219393_s_at	AKT3	0.0551596
210679_x_at	MORN3	0.0505743
227138_at	CRTAP	0.0501811
229246_at	SRSF1	0.0495729
233059_at	KCNJ3	0.0492859
222104_x_at	GTF2H3	0.0484759
231411_at	LHFPL6	0.047782
228570_at	BTBD11	0.0470974
219032_x_at	OPN3	0.046894
219056_at	RNASEH2B	0.0455428
223420_at	DNAJC14	0.0444308
221918_at	CDK17	0.0442334
230968_at	HDAC9	0.0438371
224377_s_at	RAB18	0.0436864
205027_s_at	MAP3K8	0.0434403
227400_at	NFIX	0.0417031
211838_x_at	PCDHA5	0.041504
221698_s_at	CLEC7A	0.0407304
202939_at	ZMPSTE24	0.0383475
1554351_a_at	TIPRL	0.0373581
220235_s_at	LRIF1	0.037316
201417_at	SOX4	0.0371717
208784_s_at	KLHDC3	0.0367292
1563022_at	CCDC160	0.0363476
1555304_a_at	KCNH5	0.0363333
206825_at	OXTR	0.0357277
224460_s_at	L2HGDH	0.0356019
221750_at	HMGCS1	0.0354888
209542_x_at	IGF1	0.03466
211612_s_at	IL13RA1	0.0344353
225641_at	MEF2D	0.0328814
221041_s_at	SLC17A5	0.0328422
235010_at	ZBED5-AS1	0.0328092
1564381_s_at	CEBPZOS	0.0325228
201934_at	WDR82	0.0324485
206068_s_at	ACADL	0.0317469
202498_s_at	SLC2A3	0.0317433
1569783_at	LRRD1	0.0315536
229125_at	KANK4	0.0311059
1555185_x_at	TERF2	0.0310035
231186_at	LINC00643	0.0297298
208695_s_at	RPL39	0.0293799
242608_x_at	FAM161B	0.0292557
206565_x_at	GUSBP14	0.0291583
1567628_at	CD74	0.0287741
201815_s_at	TBC1D5	0.0287737
210542_s_at	SLCO3A1	0.0279689
1563003_at	ITGAX	0.0278349
237706_at	STXBP4	0.0277908
218226_s_at	NDUFB4	0.0275336
229233_at	NRG3	0.0271644
236902_at	LINC00643	0.0263458
222878_s_at	OTUB2	0.0260734
1569430_at	PTRH1	0.0245399
226689_at	CISD2	0.0245091
200091_s_at	RPS25	0.0240866
232370_at	GATA2-AS1	0.0236383
209240_at	OGT	0.0225897
1556798_a_at	GRASLND	0.0225655
217991_x_at	SSBP3	0.0219881
218072_at	COMMD9	0.0217919
1562321_at	PDK4	0.0215717
218541_s_at	TCIM	0.0215025
206059_at	ZNF91	0.0214491
1555591_at	PIF1	0.0214176
226982_at	ELL2	0.0207166
1554016_a_at	USB1	0.0202397
203200_s_at	MTRR	0.0202397
215228_at	NHLH2	0.0198376
1555820_a_at	MKS1	0.0196034
218057_x_at	EMC8	0.0190793
204944_at	PTPRG	0.0176745
35776_at	ITSN1	0.0175424
213763_at	HIPK2	0.0173045
235127_at	PMP2	0.0170914
214749_s_at	ARMCX6	0.016993
231807_at	KIAA1217	0.0167488
213096_at	TMCC2	0.016681
201013_s_at	PAICS	0.0165581
237011_at	LINC01128	0.0165308
213722_at	SOX2	0.016051
1552745_at	SLCO6A1	0.0159997
221788_at	PGM3	0.0159566
1553756_at	GLIS3-AS1	0.0157373
227955_s_at	EFNA5	0.0156427
1560128_x_at	IRF1-AS1	0.0152554
204387_x_at	MRPL57	0.0151919
200818_at	ATP5PO	0.015165
200785_s_at	LRP1	0.0151357
232662_x_at	PRXL2A	0.0144193
225092_at	RABEP1	0.0140078
227437_at	NRAV	0.0137363
202545_at	PRKCD	0.0131658
223184_s_at	AGPAT3	0.0128904
201672_s_at	USP14	0.0128344
202444_s_at	ERLIN1	0.0127261
225039_at	RPE	0.0126815
203151_at	MAP1A	0.0123605
217964_at	TTC19	0.0122489
220547_s_at	SHLD2	0.0119478
200966_x_at	ALDOA	0.0115457
204709_s_at	KIF23	0.0113563
1563920_at	DENND10	0.0111883
209049_s_at	ZMYND8	0.0111748
212860_at	ZDHHC18	0.0109678
232950_s_at	PITPNM2	0.0107862
209389_x_at	DBI	0.0107213
219319_at	HIF3A	0.0106029
223231_at	TATDN1	0.0105341
238057_at	USP45	0.010186
226583_at	C12orf76	0.0101843
231380_at	C8orf34	0.0101316
219619_at	DIRAS2	0.00994836
224598_at	MGAT4B	0.00955275
203968_s_at	CDC6	0.00953948
208124_s_at	SEMA4F	0.00947534
241185_at	SAE1	0.00939885
205705_at	ANKRD26	0.0093307
235120_at	SEC22C	0.00914788
212975_at	DENND3	0.00902895
233775_x_at	LOC100289333	0.00891955
226697_at	FAM114A1	0.00884234
1562139_a_at	FOXP2	0.00872281
218202_x_at	MRPL44	0.00864432
202893_at	UNC13B	0.008503
203839_s_at	TNK2	0.008464
201219_at	CTBP2	0.00842162
203457_at	STX7	0.00841715
232520_s_at	NSFL1C	0.00833366
201042_at	TGM2	0.00831179
242872_at	CIT	0.0082267
200657_at	SLC25A5	0.00807016
213799_s_at	PTPRA	0.00799915
1552569_a_at	RTP3	0.00786725
243166_at	SLC30A5	0.00777036
216693_x_at	HDGFL3	0.00755528
213807_x_at	MET	0.0074696
218517_at	JADE1	0.00743103
244677_at	PER1	0.00705127
204744_s_at	IARS1	0.00697605
202641_at	ARL3	0.00687736
228340_at	TLE3	0.00668529
236910_at	MRPL39	0.00663964
220081_x_at	HSD17B7	0.00655954
203309_s_at	HPS1	0.00655544
210186_s_at	FKBP1A	0.00632135
202991_at	STARD3	0.00630397
210663_s_at	KYNU	0.00628553
1569688_at	FMO5	0.00618502
201183_s_at	CHD4	0.00617634
215895_x_at	PLIN2	0.00611199
227511_at	SAMD4B	0.00594743
213566_at	RNASE6	0.00573882
212119_at	RHOQ	0.00572796
242880_at	NALCN	0.00571152
224667_x_at	ANAPC16	0.00565022
1553220_at	FAM117B	0.00560369
1555358_a_at	ENTPD4	0.00557934
210622_x_at	CDK10	0.00550386
203927_at	NFKBIE	0.0054833
226693_at	SDHAP1	0.00546203
218731_s_at	VWA1	0.00545222
201912_s_at	GSPT1	0.00533074
226377_at	NFIC	0.00529518
229666_s_at	CSTF3	0.00526139
202988_s_at	RGS1	0.00512358
210671_x_at	MAPK8	0.00511645
238885_at	KIAA1549	0.00487261
218703_at	SEC22A	0.00486503
1562953_s_at	WDFY3-AS2	0.0048258
226358_at	APH1B	0.00478545
202868_s_at	POP4	0.00473282
232305_at	HMGCLL1	0.00466454
1560827_at	LOC101928725	0.00466271
233056_x_at	DLGAP4	0.00458419
LightGBM
Probeset	Gene Symbol	Mean SHAP score
213325_at	NECTIN3	4.41603
222774_s_at	NETO2	4.04607
223550_s_at	CA10	3.17695
226113_at	ZNF436	1.594
218214_at	ATG101	1.56096
236377_at	TMEM132D	1.16814
214913_at	ADAMTS3	1.00462
212540_at	CDC34	0.972068
217781_s_at	ZNF106	0.912618
201207_at	TNFAIP1	0.885695
226114_at	ZNF436	0.672991
225048_at	PHF10	0.651564
224896_s_at	TTL	0.635376
1569009_s_at	LOC100132249	0.591882
204134_at	PDE2A	0.551458
203798_s_at	VSNL1	0.525033
218860_at	NOC4L	0.506333
238481_at	MGP	0.503926
236211_at	RAB40B	0.494875
224224_s_at	PDE11A	0.469768
226397_s_at	PHACTR1	0.45954
201877_s_at	PPP2R5C	0.444463
212805_at	PRUNE2	0.434238
218682_s_at	SLC4A1AP	0.411377
213670_x_at	NSUN5P1	0.388738
218839_at	HEY1	0.378544
222123_s_at	HIF3A	0.374894
203839_s_at	TNK2	0.372882
1553864_at	GPR26	0.348656
227124_at	SMIM13	0.324173
219277_s_at	OGDHL	0.309735
236563_at	RD3	0.307628
228626_at	URM1	0.2983
219758_at	TTC26	0.291375
227208_at	CENATAC	0.277289
218694_at	ARMCX1	0.272534
203889_at	SCG5	0.267922
212935_at	MCF2L	0.250831
212075_s_at	CSNK2A1	0.238675
211114_x_at	GEMIN2	0.229806
227657_at	RNF150	0.226123
200089_s_at	RPL4	0.224105
227176_at	SLC2A13	0.222722
210010_s_at	SLC25A1	0.212051
213447_at	IPW	0.211746
203802_x_at	NSUN5	0.206691
227047_x_at	ZBTB4	0.196767
1553865_a_at	GPR26	0.19583
203608_at	ALDH5A1	0.194925
223185_s_at	BHLHE41	0.19193
203648_at	TATDN2	0.190612
220520_s_at	NUP62CL	0.187542
209158_s_at	CYTH2	0.187048
210105_s_at	FYN	0.181752
221325_at	KCNK13	0.180511
200801_x_at	ACTB	0.179756
210056_at	RND1	0.179151
226053_at	MAP2K7	0.178293
203549_s_at	LPL	0.173493
219521_at	B3GAT1	0.171327
205572_at	ANGPT2	0.166922
237719_x_at	RGS7BP	0.164785
204995_at	CDK5R1	0.160898
212946_at	VWA8	0.160308
1556151_at	ITFG1	0.155668
231411_at	LHFPL6	0.155089
218546_at	C1orf115	0.152915
236915_at	C4orf47	0.146325
220343_at	PDE7B	0.145255
200842_s_at	EPRS1	0.142756
210602_s_at	CDH6	0.141878
227215_at	GOPC	0.137586
220953_s_at	MTMR12	0.133734
217294_s_at	ENO1	0.133434
208123_at	KCNB2	0.132458
212336_at	EPB41L1	0.132078
242385_at	RORB	0.127872
204019_s_at	SH3YL1	0.124245
216206_x_at	MAP2K7	0.118466
234989_at	NEAT1	0.115705
222985_at	YWHAG	0.115118
201955_at	CCNC	0.114974
223108_s_at	ZCCHC17	0.113254
204666_s_at	SIKE1	0.109931
202960_s_at	MMUT	0.108071
206258_at	ST8SIA5	0.106115
224367_at	BEX2	0.10531
1554789_a_at	PDE8B	0.104388
213699_s_at	YWHAQ	0.103344
228774_at	CEP78	0.100831
218731_s_at	VWA1	0.0996116
204301_at	KBTBD11	0.0994632
204604_at	CDK14	0.098572
201872_s_at	ABCE1	0.095435
209575_at	IL10RB	0.088548
201032_at	BLCAP	0.0879319
213394_at	MAPKBP1	0.0874836
210691_s_at	CACYBP	0.0859333
201835_s_at	PRKAB1	0.0851842
203543_s_at	KLF9	0.0837749
229123_at	ZNF224	0.0814773
209484_s_at	NSL1	0.0814584
218478_s_at	ZCCHC8	0.0805571
210772_at	FPR2	0.0802071
201993_x_at	HNRNPDL	0.0801995
225446_at	BRWD1	0.0780111
203582_s_at	RAB4A	0.0769361
228168_at	ATP5MC3	0.0762392
211628_x_at	FTH1P5	0.0755347
235819_at	BTF3L4	0.0752419
242400_at	ZFP90	0.0742402
238823_at	FMNL3	0.0706122
202550_s_at	VAPB	0.0695585
208865_at	CSNK1A1	0.0695458
229062_at	ARL9	0.0685957
218494_s_at	SLC2A4RG	0.0684285
237974_at	ABHD12B	0.0682408
200919_at	PHC2	0.0675802
1558201_s_at	SLC4A1AP	0.0669672
242584_at	FAM161A	0.066598
222844_s_at	SRR	0.0658345
207667_s_at	MAP2K3	0.0649626
218957_s_at	PAAF1	0.0640626
229497_at	ANKDD1A	0.0625518
1561894_at	CYREN	0.0620598
221894_at	ADCK2	0.0619156
1566670_at	PDXK	0.0610593
219714_s_at	CACNA2D3	0.061005
227041_at	SESTD1	0.0593712
211948_x_at	PRRC2C	0.0591606
216594_x_at	AKR1C1	0.0582772
213352_at	TMCC1	0.0575585
214920_at	THSD7A	0.057445
1553214_a_at	CCDC7	0.0548458
1555945_s_at	FAM120A	0.054649
226186_at	TMOD2	0.053796
229742_at	C15orf61	0.0528505
49306_at	RASSF4	0.0526923
202250_s_at	DCAF8	0.0520223
236265_at	SP4	0.0503186
213419_at	APBB2	0.0499757
213707_s_at	DLX5	0.049929
208703_s_at	APLP2	0.0491589
225641_at	MEF2D	0.0488151
212152_x_at	ARID1A	0.0482537
236024_at	GPM6A	0.0480955
203720_s_at	ERCC1	0.0479107
222003_s_at	DOCK6	0.047481
207147_at	DLX2	0.0462965
202128_at	AREL1	0.0454503
215803_at	RADX	0.0453287
228145_s_at	ZNF398	0.0447327
219966_x_at	BANP	0.0439448
237597_at	LOC105375547	0.0438767
235764_at	PRDM5	0.0435827
204992_s_at	PFN2	0.0423198
222754_at	TRNT1	0.0414654
1566513_a_at	GNG4	0.0408763
229961_x_at	YJEFN3	0.0402429
1552745_at	SLCO6A1	0.0390893
226043_at	GPSM1	0.0384396
202282_at	HSD17B10	0.0381543
223321_s_at	FGFRL1	0.0379851
210933_s_at	FSCN1	0.0376296
219515_at	PRDM10	0.0373982
223411_at	MIF4GD	0.0372636
239185_at	ABCA9	0.0366167
219639_x_at	PARP6	0.0360784
242408_at	STYX	0.0355913
229267_at	ANAPC1	0.0353269
1557301_a_at	LRRC3C	0.0351528
201754_at	COX6C	0.0346924
209167_at	GPM6B	0.034496
213548_s_at	CDV3	0.0339313
1553428_at	LY86-AS1	0.0336643
202519_at	MLXIP	0.0328286
221984_s_at	RETREG2	0.03277
219090_at	SLC24A3	0.032748
204672_s_at	ANKRD6	0.0325037
38340_at	HIP1R	0.0315987
212934_at	UBXN2B	0.0315413
203476_at	TPBG	0.030637
223117_s_at	USP47	0.0304553
213744_at	ATRNL1	0.0301985
207880_at	ADAM11	0.0300774
205293_x_at	BAIAP2	0.0291257
204361_s_at	SKAP2	0.0282812
232168_x_at	MACF1	0.0279785
241789_at	RBMS3	0.0278747
220046_s_at	CCNL1	0.0275302
231625_at	SLC22A9	0.0264705
1562906_at	FAM170A	0.0262782
214657_s_at	NEAT1	0.0260414
210950_s_at	FDFT1	0.0259644
206616_s_at	ADAM22	0.0258528
222758_s_at	TMEM132A	0.0255254
213698_at	TMEM35B	0.0254713
1569348_at	TPTEP1	0.0253215
225214_at	LOC100129034	0.0251995
214055_x_at	PRRC2C	0.025141
209506_s_at	NR2F1	0.0249889
203954_x_at	CLDN3	0.0246419
201400_at	PSMB3	0.0245615
204581_at	CD22	0.0244475
215286_s_at	PHTF2	0.0240583
1560316_s_at	GLCCI1	0.0238631
234967_at	IL6ST	0.0234827
204967_at	SHROOM2	0.0234068
221764_at	R3HDM4	0.0226227
214774_x_at	TOX3	0.0212784
209297_at	ITSN1	0.0211633
239575_at	OPALIN	0.0205579
215989_at	CBX2	0.0205078
214001_x_at	RPS10	0.0202908
209460_at	ABAT	0.0197693
223299_at	SEC11C	0.0195355
1569076_a_at	ZNF836	0.0191742
206819_at	POM121L9P	0.0189499
217991_x_at	SSBP3	0.0187445
208763_s_at	TSC22D3	0.018445
1556551_s_at	SLC39A6	0.0181437
213609_s_at	SEZ6L	0.0181172
202356_s_at	GTF2F1	0.0180857
234725_s_at	SEMA4B	0.0179401
209852_x_at	PSME3	0.0179267
212026_s_at	EXOC7	0.0179176
201325_s_at	EMP1	0.0178553
1569594_a_at	NEMF	0.0178341
210967_x_at	CACNB1	0.017742
227611_at	TARS3	0.0175353
212284_x_at	TPT1	0.0174642
229846_s_at	MAPKAP1	0.0174545
205493_s_at	DPYSL4	0.0173623
211961_s_at	RAB7A	0.0172758
201681_s_at	DLG5	0.0170037
1553418_a_at	CNTNAP5	0.0168748
229953_x_at	LCA5	0.016763
44120_at	ADCK2	0.01629
208226_x_at	ADAM22	0.0162378
201630_s_at	ACP1	0.015975
230737_s_at	SVIL-AS1	0.0155908
221711_s_at	BABAM1	0.0154153
230361_at	MROH1	0.0153003
217869_at	HSD17B12	0.0151661
223352_s_at	C17orf80	0.0150092
212323_s_at	VPS13D	0.0144935
228807_at	ASPA	0.0142013
227978_s_at	ZADH2	0.0141926
1552439_s_at	MEGF11	0.0136316
210248_at	WNT7A	0.0134694
228835_at	TMEM59	0.0134501
202192_s_at	GAS7	0.0133434
224758_at	STMP1	0.0132217
1553959_a_at	B3GALT6	0.0129755
208899_x_at	ATP6V1D	0.0128743
225039_at	RPE	0.0124775
224110_at	PRO1804	0.0121364
219288_at	C3orf14	0.0120445
225302_at	TMX3	0.0119379
207266_x_at	RBMS1	0.0118771
221139_s_at	CSAD	0.0117485
211200_s_at	EFCAB2	0.0117144
238605_at	NOL4	0.0116837
225221_at	ZKSCAN1	0.0115748
40472_at	LPCAT4	0.0114078
228283_at	CMC1	0.0112378
211423_s_at	SC5D	0.0110916
204916_at	RAMP1	0.0110308
228822_s_at	USP16	0.0107537
213799_s_at	PTPRA	0.0106892
213326_at	VAMP1	0.0106276
230748_at	SLC16A6	0.0103064
218200_s_at	NDUFB2	0.0102407
200067_x_at	SNX3	0.00997366
214448_x_at	NFKBIB	0.00996152
243727_at	CPNE8	0.00995254
223020_at	CLPTM1L	0.00986961
202244_at	PSMB4	0.00967357
230029_x_at	UBR3	0.00934048
211625_s_at	DRD3	0.00927232
218291_at	LAMTOR2	0.00911588
215548_s_at	SCFD1	0.00908967
213233_s_at	KLHL9	0.00872001
228249_at	IFTAP	0.00871326
220305_at	MAVS	0.00844436
212078_s_at	KMT2A	0.008418
228381_at	ATF7IP2	0.00837577
1565844_at	BRPF3	0.0083614
208113_x_at	PABPC3	0.0083081
221507_at	TNPO2	0.00828469
214484_s_at	SIGMAR1	0.00821232
219928_s_at	CABYR	0.00789271
1560554_a_at	OBSCN-AS1	0.00772614
229256_at	PGM2L1	0.00770897
221998_s_at	VRK3	0.00770042
203646_at	FDX1	0.00761236
209975_at	CYP2E1	0.00759959
203309_s_at	HPS1	0.00749179
200639_s_at	YWHAZ	0.00738281
222614_at	RWDD2B	0.00731837
203093_s_at	TIMM44	0.00731166
222449_at	PMEPA1	0.0072725
1552924_a_at	PITPNM2	0.00725654
214661_s_at	NOP14	0.00721178
223226_x_at	SSBP4	0.00717775
226614_s_at	FAM167A	0.0070049
233680_at	LINC02149	0.00656368
206070_s_at	EPHA3	0.00656248
224980_at	LEMD2	0.006484
201293_x_at	PPIA	0.0063615
1560136_at	ARL5C	0.00634364
238935_at	RPS27L	0.00629309
1569791_at	STK4	0.00628092
203756_at	ARHGEF17	0.00621792
219881_s_at	CTC-338M12.4	0.00616657
200605_s_at	PRKAR1A	0.00612434
222243_s_at	TOB2	0.00609911
243066_at	NPL	0.00604496
1555889_a_at	CRTAP	0.00600418
213742_at	SRSF11	0.00597965
209293_x_at	ID4	0.00591804
227955_s_at	EFNA5	0.00590348
206850_at	RASL10A	0.0057325
226400_at	CDC42	0.00564765
201195_s_at	SLC7A5	0.00563254
230497_at	CELF5	0.0053324
217584_at	NPC1	0.0052923
209069_s_at	H3-3B	0.00517968
219056_at	RNASEH2B	0.00517886
203968_s_at	CDC6	0.00512504
228753_at	CBLL1-AS1	0.00507009
222531_s_at	AP5M1	0.00502084
214298_x_at	SEPTIN6	0.00501294
202775_s_at	SFSWAP	0.00495285
200717_x_at	RPL7	0.00472414
226969_at	MTR	0.00463562
243409_at	FOXL1	0.00462875
207054_at	IMPG1	0.00450913
212453_at	KIFBP	0.00442344
203535_at	S100A9	0.00434047
1552569_a_at	RTP3	0.00426674
210638_s_at	FBXO9	0.00423676
212355_at	KHNYN	0.00396754
225882_at	SLC35B4	0.00396442
200845_s_at	PRDX6	0.00394851
231579_s_at	TIMP2	0.00393816
201194_at	SELENOW	0.00378022
222551_s_at	C8orf33	0.00376052
204593_s_at	MIEF1	0.00375738
1562633_at	RMST	0.00374747
227014_at	ASPHD2	0.00371387
1861_at	BAD	0.00369819
241233_x_at	ANKRD20A11P	0.00369449
236880_at	RAD52	0.00358522
237867_s_at	PID1	0.00347256
1553793_a_at	KIAA1109	0.00346168
1556435_at	LOC400622	0.00344712
231822_at	CTTNBP2NL	0.0032641
201540_at	FHL1	0.00325706
217528_at	CLCA2	0.00301598
209196_at	WDR46	0.00293726
209859_at	TRIM9	0.0029306
224352_s_at	CFL2	0.00287323
225781_at	MAPK9	0.00278979
213647_at	DNA2	0.0027848
213104_at	TSR3	0.00266068
215892_at	ZNF440	0.00263263
205187_at	SMAD5	0.00257936
201484_at	SUPT4H1	0.00255618
217456_x_at	HLA-E	0.00254108
205330_at	MN1	0.00251868
221236_s_at	STMN4	0.0024874
210977_s_at	HSF4	0.00229025
211765_x_at	PPIA	0.00227014
216073_at	ANKRD34C	0.00223569
202202_s_at	LAMA4	0.00221939
218423_x_at	VPS54	0.00221237
212741_at	MAOA	0.00220039
221794_at	DOCK6	0.0021567
230628_at	EP400	0.00210326
219179_at	DACT1	0.00205247
218857_s_at	ASRGL1	0.00205026
217080_s_at	HOMER2	0.00203982
222975_s_at	CSDE1	0.0020065
241774_at	PSMA3-AS1	0.0019464
227902_at	ZFP41	0.00191759
203233_at	IL4R	0.00191436
229410_at	SLC35E1	0.00180673
1557211_a_at	FAM181A-AS1	0.00179312
229080_at	COL26A1	0.00178001
206199_at	CEACAM7	0.0017637
225438_at	NUDCD1	0.00176198
214312_at	FOXA2	0.00175607
218117_at	RBX1	0.00174209
1561055_at	LINC02192	0.00172453
218533_s_at	UCKL1	0.00168003
206137_at	RIMS2	0.00162444
222442_s_at	ARL8B	0.0016086
224562_at	WASF2	0.00159905
211020_at	GCNT2	0.00159409
212565_at	STK38L	0.00157719
200888_s_at	RPL23	0.00148919
243176_at	ARL5A	0.0014528
205097_at	SLC26A2	0.0013421
